# Supplementary material for: Interactive transcriptome analysis of malaria patients and infectingPlasmodium falciparum
Source: HighWire-hosted journal article supplement (doi:10.1101/gr.158980.113), 2014-08-04
Supplement: Supplemental_Legends.docx [file Supplemental_Legends.docx]

**Supplementary Table 1. Statistics of the tags found in Patients and Controls in the present study**.

Number of tags mapped to the human, Pf, and both genomes are shown in the third, fourth and fifth columns, respectively. For the last column, we separately counted and annotated the SNPs residing within a five-base-distance from the known exon junctions. Although we believe that many of them are true SNPs, they need further manual inspections. Information on the control samples which were collected from 25 healthy people and 28 patients having other infectious diseases are shown separately.

**Supplementary Table 2. Expression levels calculated for each gene for each sample.**

(A) Human (malaria patients, healthy controls and controls having other diseases) (B) Pf. Expression levels were normalized against that of the *GAPDH* in the respective organism. Genes with levels >1 rpkm in at least one sample were used for the analysis.

**Supplementary Table 3. Tags associated with the indicated gene categories**. (A) Human; (B) Pf. Tag counts are average of the 116 patients.

**Supplementary Table 4.** **Genes binned under each category in Figure 1D**

**Supplementary Tables 5-8 Lists of individual genes, GO terms, and KEGG pathways associated with clinical data in humans and parasites**

Genes: human (Supplementary Table 5), Pf (Supplementary Table 6); GO terms and KEGG pathways: human (Supplementary Table 7), Pf (Supplementary Table 8), which were enriched for the indicated category are shown. Statistical significance was calculated using the indicated method. For details, see the text. Only the cases with the most significant associations with the indicated clinical information are shown.

**Supplementary Table 9. Tags associated with immune-related genes**

(A) TLR pathway genes, (B) interleukins, (C) inflammatory cytokines, (D) type I IFN. Bean plots in column D are for patients with high %Pf tags and low %Pf tags. Data for from the healthy controls and the controls having other diseases are also shown. p-values less than 0.05 were emphasized by red characters. Column K represents the patters of expressions as appearing in Figure 4. The p-values were calculated between the indicated two populations.

**Supplementary Table 10. Genetic variations identified in the indicated genes**

(A) Pf CRT gene (B) Pf multidrug resistance protein, (C) Pf calcium-transporting ATPase. All three are thought to be involved in drug resistance in parasites (see text). In column 7, 1=known variation; 0=unknown variation

**Supplementary Table 11. Descriptions of the malarial and control subjects and their samples**

Data of malaria patients and control samples are shown separately. Statistics of the age and sex of the respective datasets are also shown.

**Supplementary Table 12. Real time RT-PCR validations**

Results of the real time RT-PCR (Ct values) and the RNA-seq analysis, both of which were normalized to those of the GAPDH gene, are shown for humans and parasites. Primers used for the validation are shown in the second worksheet.

**Supplementary Figure 1. Summary of the Samples used for the present study**

Statistics of the age/sex matched controls (upper panel). Middle and lower panels represent the sequence statistics of the healthy controls (n= 25) and the control patients having other infectious diseases (n= 28), respectively. Also note that essentially no Pf tags were identified from these controls. The RNA-seq tags were then mapped to the reference genomes of human (hg19, UCSC Genome Browser; <http://genome.ucsc.edu/>) and Pf (PlasmoDB Release 6.0; <http://plasmodb.org/plasmo/>), allowing two-base mismatches, using the BWA mapping software ([Li and Durbin 2009](#_ENREF_28)). Only the RNA-seq tags that mapped solely onto either of the genomes were selected. We further filtered tags for which the second best hits were within one-base mismatch distance from the best hits to ensure correct SNP calls at the later step (For details in the mapping ratio for each sample, Supplementary Table 1). Mapped tag sequences were assigned to the genes annotated in the overlapping regions in either Pf or human. Tag counts were normalized to read per million tags per kilobase mRNA (rpkm) and were used as the gene expression information. Relative expression levels between samples were calculated using the human and Pf GAPDH genes as the normalization standards.

**Supplementary Figure 2. Representation of the RNA-seq tags**

(A) Breakdown of the genomic regions to which the RNA-seq tags were mapped in humans (left) and parasites (Pf, right). Definitions of the coding regions, non-coding regions, or their proximal regions are as given in Material and Methods. (B) Distributions of the genes represented by the indicated tag counts (x-axis) in humans (left) and parasites (right).

**Supplementary Figure 3. Validation analysis using real-time RT-PCR for independent genes**Representative cases in humans (A) and parasites (B) are shown with the number of samples (n) and correlations between real-time RT-PCR (Ct) and RNA-seq (RPKM).

**Supplementary Figure 4. Variations in gene expression levels**

(A) Distributions of the gene expression levels identified by RNA-seq tag counts in humans (left) and parasites (Pf, right). Vertical bars represent standard deviations of the gene expression levels in 116 patients for each gene. X-axis: Genes are sorted in order of their average gene expressions. Y-axis: gene expression levels. (B) Distributions of the relative deviations of the gene expression levels in humans (left) and parasites (right). Relative deviation was calculated as standard deviation divided by average expression levels for each gene.

**Supplementary Figure 5. Expression levels of the human *CD163* and *CBLB***

(A) Gene expression levels of the ***CD163*** (y-axis) in the patients having the indicated %Pf tags (x-axis). Its expression levels in the healthy controls and controls having other diseases are also shown (the first and the second bars, respectively). Statistical significances in the differences for the indicated populations are shown in the margin. (B) Statistical significance in the differences between the indicated populations. Statistical significance was evaluated by Wilcoxon’s signed rank test. (C) Gene expression levels of the *CBLB* as measured by RNA-seq tag counts for malaria patients (left panel) and healthy controls (right panel). (D) Expression levels of the *CBLB* for the indicated sub-population in the malaria patients and the healthy controls. Statistical significance in the difference for each age range was evaluated by Wilcoxon’s singed rank test.

**Supplementary Figure 6. Permutation test for the correlation in gene expressions between humans and parasites**

(A) For permutation test, pairs of human tags and their corresponding parasite tags were randomly shuffled. Spearman’s correlations were calculated for each pair of human and parasite similarly with the case in Figure 5A. Such permutation test was repeated 1000 times and average distribution is shown. (B) Population belonging to the indicated groups. Note that distributions are clearly different between original and permutated datasets.

**Supplementary Figure 7. Construction of the Fullmal database**

Screenshot of the Fullmal database constructed for retrieving individual data presented in this study. (A) Gene viewer and (B) expression pattern viewer of the database are represented. Fullmal is accessible at <http://fullmal.hgc.jp/> (which will be open on request).
