# Supplementary material for: Interactive transcriptome analysis of malaria patients and infectingPlasmodium falciparum
Source: HighWire-hosted journal article supplement (doi:10.1101/gr.158980.113), 2014-08-04
Supplement: Supplemental_Table_1.xlsx [file Supplemental_Table_1.xlsx]

## Sheet: Patients
	All	Human_mapped	Pf_mapped	Both_mapped	Or_mapped	Human_Uniq_filtered	Human_NoMissmatch_filtered	Human_mapped_filtered_splice	Human_Non-splice+splice	Human_SNP	Human_Snp_splice_site	Human_cSNPs	Human_cSnps_splice_site	Pf_Uniq_filtered	Pf_NoMissmatch_filtered	Pf_mapped_filtered_splice	Pf_Non-splice+splice	Pf_SNP	Pf_Snp_splice_site	Pf_cSNPs	Pf_cSNP_splice_site
Total	3460203011	2794371292	244767495	22814871	3016323916	1602394228	1398863612	119777310	1518640922	4693385	21137	41878	305	189523593	168691464	4456144	173147608	278026	658	27313	46
% (against ALL)	1	0.81	0.07	0.007	0.87	0.57	0.87	0.08	0.44					0.77	0.89	0.03	0.05
Average	2.98293e+07	2.40894e+07	2.11006e+06	196680	2.60028e+07	1.38137e+07	1.20592e+07	1.03256e+06	13091732	40460.2	182.216	361.017	2.62931	1633824	1.45886e+06	38415	1492652	2396.78	5.67241	235.457	0.396552
Patient_ID	All	Human_mapped	Pf_mapped	Both_mapped	Or_mapped	Human_Uniq_filtered	Human_NoMissmatch_filtered	Human_mapped_filtered_splice	Human_Non-splice+splice	Human_SNP	Human_Snp_splice_site	Human_cSNPs	Human_cSnps_splice_site	Pf_Uniq_filtered	Pf_NoMissmatch_filtered	Pf_mapped_filtered_splice	Pf_Non-splice+splice	Pf_SNP	Pf_Snp_splice_site	Pf_cSNPs	Pf_cSNP_splice_site
4	21371236	18501145	555199	39286	19017058	8232232	7126495	560899	7687394	19551	119	122	0	464066	401047	16078	417125	1435	2	93	0
5	22709834	19547133	1095368	114040	20528461	13208506	11669647	1120767	12790414	52730	260	523	3	823232	736815	29008	765823	1709	4	140	0
6	23533867	20801086	577300	76224	21302162	13590875	12065484	1252216	13317700	44610	229	443	3	417752	373634	13984		935	2	73	0
7	20539282	17523051	19390	17905	17524536	9895621	8225793	824394	9050187	30983	180	380	1	936	34	0	34	33	0	1	0
8	18440647	15775932	149670	53813	15871789	7457571	6400121	558125	6958246	20097	122	142	2	80126	68699	2475	71174	355	0	23	0
9	25809451	23063824	99942	45081	23118685	13255344	11552174	1116988	12669162	45367	231	413	2	43045	35832	1368	37200	222	1	13	0
11	25470056	21995947	217889	132321	22081515	10571050	9285681	600292	9885973	21698	122	195	2	71967	57362	3150	60512	487	0	11	0
12	31887478	26375145	166064	139733	26401476	15985833	14028886	1182519	15211405	24543	180	210	3	13544	7919	396	8315	79	0	0	0
13	30545759	25277409	222916	161142	25339183	12357273	10960047	967938	11927985	23385	126	184	0	16649	148	6	154	334	0	4	0
14	29668537	25504621	606709	99121	26012209	13376418	11770214	1003780	12773994	38820	187	282	2	459862	407933	28185	436118	2155	4	77	0
15	27539386	20847616	132275	71813	20908078	8717438	7713414	535731	8249145	12491	83	114	1	44050	37992	3399	41391	185	0	6	0
16	28569096	24331309	1467713	173155	25625867	15217184	13479729	949213	14428942	33926	191	298	2	1029324	909203	39780	948983	2336	8	150	0
17	30104727	26647581	112180	64109	26695652	13822820	12557125	1486737	14043862	7430	53	62	1	33596	28502	2756	31258	190	2	6	0
18	31060684	25836649	1181106	125115	26892640	15889191	14305175	1217892	15523067	32728	193	314	3	864195	775334	33858	809192	1225	4	68	0
19	32865610	28779261	403700	115231	29067730	16581396	14614125	1334201	15948326	36845	210	366	5	224764	197651	7855	205506	724	0	41	0
20	32741049	28522199	367365	109113	28780451	13225526	11786938	1137798	12924736	16637	116	168	0	204248	181217	8938	190155	751	3	49	0
21	32659785	29114407	71480	65162	29120725	18947637	17172318	1612522	18784840	71446	355	744	4	2792	149	5	154	103	2	2	0
22	31985001	27827413	48571	41213	27834771	16989569	15365735	1380209	16745944	53868	278	542	3	4209	1918	56	1974	98	0	2	0
23	28833641	25453955	93610	56596	25490969	12795055	11304719	1039660	12344379	30274	174	319	1	27194	22701	929	23630	153	0	5	0
24	36486044	32467931	670363	111769	33026525	20064341	18060980	1466483	19527463	60339	279	557	7	463159	411949	7783	419732	1482	9	82	0
25	27980527	23635231	1442990	124339	24953882	14441120	12224592	1098539	13323131	42018	263	494	5	1010638	866190	40320	906510	1765	4	117	0
26	33718682	29636545	992703	142665	30486583	18145727	16134799	1540071	17674870	42722	232	453	5	627099	565027	26601	591628	1292	1	73	0
27	32962403	29072397	895248	117698	29849947	18164272	16033930	1448746	17482676	24418	182	300	2	616043	512934	21255	534189	625	1	27	0
28	28782749	25137619	182453	63997	25256075	10504182	9170238	791524	9961762	11236	85	128	2	97470	80152	3069	83221	199	1	12	0
29	38495676	34777470	200406	141597	34836279	21335438	18849330	1641070	20490400	35162	208	383	2	36615	29540	958	30498	84	0	2	0
30	32152387	27202857	1429077	318508	28313426	15706202	13703655	1359256	15062911	32583	203	409	2	869492	756918	29413	786331	1217	0	77	0
31	30166132	26832863	597312	115719	27314456	15580815	13788255	1303908	15092163	14086	88	148	1	422396	359899	11104	371003	376	0	15	0
32	27958368	24534891	123338	106074	24552155	14408378	12771053	1174372	13945425	23878	166	305	2	4869	1915	77	1992	76	0	1	0
33	16520759	14136285	1269683	218217	15187751	7231954	6224401	355415	6579816	14106	82	140	0	381396	313783	10835	324618	861	1	42	0
34	11993032	10350634	344781	42597	10652818	6872089	6082538	621205	6703743	24962	167	196	1	246353	218517	6593	225110	528	1	33	0
36	17603813	14251230	1834773	126503	15959500	9146801	7955939	793840	8749779	27054	166	258	1	1403335	1242273	57516	1299789	1688	7	115	1
37	19210280	12245881	5695613	325006	17616488	8105202	7218433	556038	7774471	15708	78	136	2	4279463	3769194	132947	3902141	3543	10	339	0
38	27092789	23185795	485590	373064	23298321	13155499	10640032	1337965	11977997	15922	62	116	1	66079	48201	963	49164	372	0	4	0
39	33195101	15667823	15883085	719780	30831128	9308509	7864887	568104	8432991	32782	129	181	1	12823055	11384616	331507	11716123	11290	29	991	3
40	28658541	22419586	3997793	570857	25846522	12830490	10908778	782199	11690977	34699	136	253	2	2583722	2275803	53040	2328843	4936	14	376	0
41	28650888	22303295	4167670	421890	26049075	13086964	11310793	764770	12075563	35469	146	228	1	3244390	2897765	70734	2968499	6163	12	489	2
42	26921340	23606789	270747	233951	23643585	13302861	11572599	1212308	12784907	36557	149	300	1	16439	9145	186	9331	210	1	2	0
43	31087281	17496184	11625610	395663	28726131	12150410	10666812	829408	11496220	42847	147	306	2	10261222	9337228	156432	9493660	9174	21	1430	3
44	30575391	25396595	1907385	186739	27117241	16405987	13079242	1313209	14392451	43583	208	372	5	1527096	1260143	29146	1289289	3177	7	353	0
45	31123279	25222101	3199620	182756	28238965	17499234	15325125	1358878	16684003	44603	197	369	6	2784139	2493610	35141	2528751	4691	12	30	0
46	33358253	28554402	1931390	196967	30288825	18823894	16507493	1605816	18113309	56803	229	456	3	1557504	1397491	24454	1421945	4201	6	397	0
47	31705168	27664271	1133800	162300	28635771	16692363	14539928	1327104	15867032	48925	217	429	4	863274	768920	22384	791304	2934	7	214	0
48	28960037	24284245	1599331	213665	25669911	11634877	9757948	998007	10755955	38774	172	290	0	1182564	1014099	31711	1045810	2917	8	202	0
49	32399363	28293138	686627	138985	28840780	13320453	11706813	1258269	12965082	23749	115	193	0	484015	433467	17842	451309	2100	7	103	0
50	28664866	24626238	1721740	252956	26095022	15513344	13564940	1324459	14889399	62867	247	509	3	1310248	1177726	36999	1214725	4424	7	239	0
51	28920748	25786796	243134	172875	25857055	14175142	12605758	1213254	13819012	31419	130	225	0	54651	43444	1301	44745	428	0	12	0
52	35177798	30729980	182511	113080	30799411	19509555	17518092	1592864	19110956	70350	253	585	4	8188	566	10	576	476	1	2	0
53	36116886	28630259	267675	164398	28733536	11560442	9524920	1121379	10646299	14954	74	130	1	81862	66512	2562	69074	383	2	17	0
54	28595590	12147668	12640110	536876	24250902	8263141	6755273	581446	7336719	35497	163	344	1	9876896	8521012	176098	8697110	8662	28	1228	4
55	28678553	22111408	646830	150404	22607834	10585937	9035700	922904	9958604	28265	127	272	2	433110	383571	8941	392512	1387	2	102	0
56	38167970	30728451	879162	191370	31416243	20368042	17075830	1789887	18865717	76455	318	741	5	583853	509036	13079	522115	1934	4	161	0
57	33488089	27777924	210665	180576	27808013	18353992	15486765	1547911	17034676	70509	302	737	6	12741	6765	138	6903	201	1	5	0
58	36922283	25842868	5387326	296904	30933290	15950070	13483240	1278575	14761815	53503	196	424	3	4601765	4081328	97426	4178754	5445	15	816	3
59	30964338	25404659	301624	141696	25564587	14569743	12370839	1156862	13527701	50688	210	539	2	124979	107097	2075	109172	644	1	22	0
60	32665559	24597153	2221160	301888	26516425	10785360	8941184	914254	9855438	22606	114	189	0	1636470	1448921	83197	1532118	4963	8	305	0
61	33005106	27032342	320203	161987	27190558	9205473	7768428	858213	8626641	6205	25	23	1	125893	105617	2848	108465	505	2	19	0
62	41644590	29792826	578152	483829	29887149	13944710	10174443	1109908	11284351	6314	20	48	0	30569	22646	865	23511	136	0	0	0
63	33441675	23475998	4243662	488362	27231298	14166315	11571162	925588	12496750	36410	159	301	2	3105578	2698503	69698	2768201	5185	13	581	1
64	35449832	25920215	4484318	219251	30185282	18372582	15382472	1277399	16659871	69663	274	585	4	3799045	3330979	80024	3411003	5999	15	800	2
65	26533428	19661474	2732441	180844	22213071	11864058	10033232	895510	10928742	48613	214	444	1	2212986	1967614	43841	2011455	4697	10	530	0
66	37906528	25451535	5855018	291945	31014608	13639529	11307782	954877	12262659	38062	153	282	3	4570856	4043403	84295	4127698	7185	16	1074	0
67	33054261	26258339	1284379	124972	27417746	13424161	11427780	1263618	12691398	31899	141	283	2	1028280	916723	14776	931499	3002	7	296	0
68	37398698	30950509	199628	148910	31001227	20410627	17221034	1280807	18501841	76479	289	656	6	37339	27831	1111	28942	308	2	4	0
69	35244077	25493051	1226231	138663	26580619	12008617	9888363	821123	10709486	30840	120	277	1	968896	840872	20883	861755	2574	5	236	1
70	34277841	28069219	283365	251137	28101447	13863728	11059911	1203123	12263034	5831	27	39	1	6163	3495	128	3623	40	0	0	0
71	23727024	19991031	776205	265250	20501986	11754123	10082722	865331	10948053	33596	155	301	2	326801	285423	8429	293852	1128	2	68	0
72	28053470	23722408	239784	210726	23751466	12925578	11234652	1226202	12460854	14510	66	121	1	8882	5693	116	5809	69	0	1	0
73	29961177	22477484	3839637	305693	26011428	14869142	12916345	993353	13909698	34006	150	271	2	2461610	2159007	76107	2235114	3998	10	293	2
74	30443069	25727549	581071	300044	26008576	14195849	12030943	958517	12989460	39133	191	342	3	174904	151114	5156	156270	669	4	32	0
75	28221983	24317671	445589	225652	24537608	15087638	12999866	1081337	14081203	44650	202	447	8	144072	123063	2148	125211	659	2	19	0
76	29064056	21165212	4337835	320319	25182728	13058909	11245594	895400	12140994	37292	173	316	5	3189659	2804160	80042	2884202	5401	11	487	0
77	23965008	20196712	740247	278047	20658912	12102908	10225773	922723	11148496	31633	145	296	4	293405	242173	6676	248849	953	3	55	0
78	24706631	19151543	2737315	261415	21627443	11895831	9915420	756681	10672101	36444	160	284	2	1746096	1476675	52119	1528794	3569	8	251	1
79	25748278	22269106	240806	172972	22336940	13385284	11337132	937434	12274566	41610	175	367	3	42561	34273	1100	35373	301	3	5	0
80	26744416	22936795	349382	176553	23109624	13929894	12023450	1044226	13067676	32320	146	270	6	119362	101256	3225	104481	611	3	23	0
81	26588914	10638481	11894747	554127	21979101	4175793	3464828	206662	3671490	8348	15	19	0	8961146	7911720	162361	8074081	10432	33	1035	3
82	29694331	22160806	1742252	134774	23768284	13030769	10663108	886120	11549228	41652	175	364	2	1366707	1155970	25887	1181857	2842	2	275	0
83	35786938	29007147	183091	113817	29076421	17546206	15068154	1355861	16424015	62406	254	624	3	54483	44398	862	45260	351	0	4	0
84	35694088	29400503	915746	168791	30147458	20565577	17684368	1590327	19274695	83576	318	734	7	658320	582665	13846	596511	1948	4	150	0
85	32209330	27071349	511614	126190	27456773	18463874	16100742	1492264	17593006	80850	327	749	3	334239	296150	8018	304168	1401	3	92	0
86	34578415	27805403	3351368	201497	30955274	9724976	8474595	2008	8476603	21118	95	174	0	2445838	2176192	36927	2213119	4074	7	549	1
87	32635761	28157925	1199884	112310	29245499	12205215	11061333	2019	11063352	21879	89	142	1	924549	841817	17990	859807	1811	7	177	0
88	31204769	23554607	5153654	230663	28477598	15093621	13122230	1187469	14309699	48097	197	478	4	4491173	4000309	86201	4086510	4747	8	610	0
89	28400463	25229800	366145	104433	25491512	11796104	10566216	911189	11477405	31547	138	298	3	201299	176878	4052	180930	1005	1	53	0
90	33424868	29833309	357031	97716	30092624	15603367	14063198	1398285	15461483	43476	188	409	3	227705	205394	7130	212524	1152	1	63	0
91	34728286	30978216	427998	173726	31232488	17937739	15994015	1574209	17568224	65072	281	673	5	205843	183380	4848	188228	1017	2	64	0
92	32614408	29148233	330587	126093	29352727	14133713	12659818	1230029	13889847	48629	203	406	5	157288	141088	3645	144733	791	3	37	0
93	39104068	12430711	24720554	352266	36798999	8074893	7103183	670811	7773994	43863	198	384	2	22297848	20370329	594745	20965074	11049	29	1656	2
94	26886651	23928885	118129	62865	23984149	2380600	7573292	698245	8271537	6573	41	58	0	39926	34899	2070	36969	242	0	10	0
95	29170721	25965466	326723	79101	26213088	13072486	11766074	1184122	12950196	32755	156	314	2	211536	192616	6343	198959	948	0	79	0
96	34695270	15823675	17060774	735712	32148737	10774740	9436340	742262	10178602	46624	156	339	2	15181159	13751697	364374	14116071	11674	25	1721	4
97	34404903	22961219	9076468	304132	31733555	15899824	14044245	1166830	15211075	79054	274	627	6	8025049	7277113	178798	7455911	7769	18	1134	4
98	33832854	30196254	370275	172498	30394031	17022026	15143306	1304953	16448259	57283	237	464	0	160864	141356	2197	143553	878	1	47	0
99	34199720	29560878	489751	180453	29870176	13330891	11820405	1313281	13133686	26657	128	187	0	277872	247321	14352	261673	1396	5	37	0
100	32526380	27832415	1083516	162910	28753021	11779681	10400219	1182389	11582608	25860	116	204	0	793943	712768	18422	731190	2114	4	163	0
101	31584882	26853615	1819101	191151	28481565	18818953	15956010	1443757	17399767	76997	324	744	2	1486480	1294841	33205	1328046	3743	10	360	0
102	26737917	22164925	1578092	125976	23617041	10429419	9263736	791994	10055730	33050	173	295	1	1175766	1053383	14585	1067968	3783	8	373	0
103	24307541	20474389	231135	154482	20551042	10885541	9629618	755814	10385432	37232	202	373	1	11907	907	16	923	433	1	5	0
104	28392052	19189856	357644	108531	19438969	11778166	10690167	997608	11687775	46322	219	487	1	28528	563	15	578	1447	2	16	0
105	28081542	20922750	4857894	143769	25636875	14388134	12850149	1078547	13928696	54586	245	515	5	4321262	3956782	125862	4082644	6343	17	801	3
106	28281354	24159114	1917009	136978	25939145	16813262	15071777	1210695	16282472	82633	341	691	7	1527815	1396132	41444	1437576	3966	15	397	1
107	26646926	23233413	1029036	85024	24177425	15112557	13645240	1063446	14708686	61966	254	577	5	813773	741871	22158	764029	2808	4	208	0
108	25416136	21615721	1389611	349511	22655821	12755747	11159836	789734	11949570	29612	134	236	2	678203	599957	17151	617108	2147	7	200	0
109	31599661	24043082	5164016	152263	29054835	16733686	14726069	1315177	16041246	78730	312	735	3	4488195	4049102	98558	4147660	4654	9	718	2
110	35027469	31424184	774244	118847	32079581	21619682	19378209	1564764	20942973	77399	303	671	5	558549	509160	13184	522344	2108	3	164	0
111	33502133	29540593	153836	110959	29583470	15364343	13739392	1180039	14919431	46016	191	406	5	5368	386	3	389	254	0	4	0
112	5947962	3121316	2198826	141563	5178579	2090231	1553183	97833	1651016	6386	28	24	0	2018728	1581295	21202	1602497	3091	5	134	0
113	3010844	2388358	202816	104910	2486264	1442585	1080811	306	1081117	4094	23	15	0	91421	67799	717	68516	192	0	1	0
114	32930245	27598322	944300	668646	27873976	12519831	10545533	928	10546461	7618	35	65	0	143024	121406	5617	127023	691	1	24	0
115	32883943	28277389	1819975	161548	29935816	18488794	16470491	8036	16478527	76032	292	597	7	1497140	1362264	44664	1406928	3944	9	393	0
116	30757858	22746148	5870229	196093	28420284	15513947	13806551	1025235	14831786	65162	275	539	5	4912446	4475998	122377	4598375	6960	18	872	3
117	34448150	29638109	1962331	183731	31416709	19165144	17018976	1333596	18352572	73753	304	605	2	1434974	1301860	32387	1334247	3400	6	336	0
118	29814503	25519797	1864225	202497	27181525	15755607	13977916	1068977	15046893	61396	261	508	5	1341229	1205269	17103	1222372	3644	10	326	0
119	29665510	26743429	379283	150821	26971891	16325838	14633815	1100436	15734251	60912	249	485	4	163058	144238	3072	147310	906	3	47	0
120	33575438	30446401	92445	75667	30463179	20568471	18596433	1737220	20333653	95285	384	957	11	7836	3893	80	3973	185	0	1	0
121	34162570	30038935	128100	96757	30070278	21437870	19168573	10283	19178856	89848	368	837	6	6006	931	26	957	340	1	4	0

## Sheet: Healthy_Control
	All	Human_mapped	Pf_mapped	Both_mapped	Or_mapped	Human_Uniq_filtered	Human_NoMissmatch_filtered	Human_mapped_filtered_splice	Human_Non-splice+splice	Pf_Uniq_filtered	Pf_NoMissmatch_filterrd
Total	880983050	792402155	3755419	3306240	792851334	482949981	394677686	26740230	421417916	78202	594
% (against ALL)	1	0.899452	0.00426276	0.0037529	0.899962	0.548194	0.447997	0.0303527	0.47835	8.87667e-05	6.74247e-07
Average	35239322	3.16961e+07	150217	132250	3.17141e+07	1.9318e+07	1.57871e+07	1.06961e+06	1.68567e+07	3128.08	23.76
Patient_ID	All	Human_mapped	Pf_mapped	Both_mapped	Or_mapped	Human_Uniq_filtered	Human_NoMissmatch_filtered	Human_mapped_filtered_splice	Human_Non-splice+splice	Pf_Uniq_filtered	Pf_NoMissmatch_filterrd
401	37144254	33624857	100206	88370	33636693	20578393	16758943	1128790	17887733	3181	33
402	34633787	31244890	205324	180677	31269537	21447150	17457608	1148874	18606482	4481	39
403	33785351	30642050	53875	48764	30647161	20750006	17042126	1211397	18253523	3675	23
404	27455881	24967055	93023	81931	24978147	16011355	13304707	887566	14192273	2591	20
405	40173667	36280071	83022	73793	36289300	22683530	18876974	1349145	20226119	3711	35
406	28262330	25540068	67348	60158	25547258	14365292	11845992	838990	12684982	1795	5
407	31960592	28619035	75060	67014	28627081	14291895	11680145	847735	12527880	1855	13
408	28741293	25955894	85057	75551	25965400	15523851	12809390	863696	13673086	2498	21
409	39451374	35816309	54139	48879	35821569	22495247	18602065	1238786	19840851	3392	43
410	33692947	30607007	64038	53941	30617104	19449163	15585266	1066011	16651277	3207	15
411	27379098	24419216	234253	206558	24446911	16337869	12839481	870697	13710178	3365	16
412	38791252	34803723	138774	123261	34819236	22226973	17795093	1259699	19054792	4034	19
413	45749487	41430680	109371	97698	41442353	25351448	21191058	1530334	22721392	3902	23
414	34563875	31426777	133481	117215	31443043	20499162	16971998	1132674	18104672	3665	37
415	33834559	30487261	118111	105064	30500308	19017533	15661911	1181778	16843689	3074	15
416	36749078	33352693	95631	85226	33363098	21578497	18006703	1231850	19238553	3707	20
417	36165677	32767752	150145	132280	32785617	21706651	17910546	1175447	19085993	3835	43
418	33098806	29856155	67178	59943	29863390	17904982	14749777	1036407	15786184	2913	26
419	37157616	32921961	234944	206869	32950036	15754771	12801764	789035	13590799	1949	14
420	43099658	38031251	340303	294115	38077439	19247296	15036051	979956	16016007	2087	9
421	40580751	36015450	252529	222818	36045161	19729353	15644310	980806	16625116	2147	19
422	33814980	29983494	333615	292970	30024139	18713827	15346550	969500	16316050	3183	32
423	28493750	24900630	374924	327431	24948123	13709467	11008553	683468	11692021	2353	12
424	43024717	38666428	122477	107932	38680973	22687792	18677039	1271674	19948713	3263	31
425	33178270	30041448	168591	147782	30062257	20888478	17073636	1065915	18139551	4339	31

## Sheet: Other_disease_Control
	All	Human_mapped	Pf_mapped	Both_mapped	Or_mapped	Human_Uniq_filtered	Human_NoMissmatch_filtered	Human_mapped_filtered_splice	Human_Non-splice+splice	Pf_Uniq_filtered	Pf_NoMissmatch_filterrd
Total	783725889	707442081	2735286	2430535	707746832	491808371	428137522	37186699	465324221	130832	643
% (against ALL)	1	0.902665	0.00349011	0.00310126	0.903054	0.627526	0.546285	0.0474486	0.593733	0.000166936	8.2044e-07
Average	2.79902e+07	25265789	97689	86805	25276673	17564585	1.52906e+07	1.3281e+06	16618722	4673	23
Patient_ID	All	Human_mapped	Pf_mapped	Both_mapped	Or_mapped	Human_Uniq_filtered	Human_NoMissmatch_filtered	Human_mapped_filtered_splice	Human_Non-splice+splice	Pf_Uniq_filtered	Pf_NoMissmatch_filterrd
301	40526783	33760505	292900	256178	33797227	23072998	19424590	1617222	21041812	5487	46
302	47187161	39482310	129150	114697	39496763	28620497	23996231	1981927	25978158	6331	40
303	27229069	24715989	151193	134153	24733029	17437124	15360900	1346879	16707779	5625	24
304	34302584	30674657	403447	353635	30724469	21787395	18951858	1483407	20435265	9407	42
305	37189775	34009271	117569	104635	34022205	24329906	21628889	1936035	23564924	7292	28
306	28882893	26437537	51497	46682	26442352	18134846	15178552	1341347	16519899	4007	20
307	24229973	22066025	59900	53900	22072025	15840658	13808368	1165656	14974024	3697	24
308	31068411	28227984	102436	91004	28239416	20424482	17915373	1528622	19443995	5713	24
309	29605285	26937463	95710	84762	26948411	19992650	17528485	1644704	19173189	5515	29
310	23023801	20703714	110813	98377	20716150	15028887	13170750	1176398	14347148	4379	22
311	23345239	21516047	62444	56314	21522177	14655893	12919991	1015931	13935922	3698	22
312	32636742	30022832	98009	87377	30033464	20255029	17864568	1495129	19359697	5467	22
313	16489908	15257283	43365	39131	15261517	10427536	9233641	792743	10026384	2595	7
314	20874995	18881530	47980	43062	18886448	11642871	10091429	936403	11027832	2513	12
315	25507228	23288896	40967	37444	23292419	15111771	13322268	1208845	14531113	3254	13
316	25298000	23075517	47806	43301	23080022	14543393	12778719	1132465	13911184	3499	28
317	24662976	22425704	56021	50274	22431451	15031147	13168992	1155823	14324815	3700	22
318	24314662	22103677	58981	52818	22109840	13710971	12137722	1137053	13274775	3274	16
319	21018829	19208443	63145	56599	19214989	13947882	12252497	1059421	13311918	3287	10
320	25378191	23184583	60194	54689	23190088	16786496	14814293	1213379	16027672	4461	20
321	28236141	25770554	71126	63841	25777839	18496390	16296082	1471603	17767685	4669	18
322	29611992	26917705	86786	77277	26927214	17564194	15138978	1390129	16529107	4497	32
323	32393373	29874458	56551	49984	29881025	20944316	18178072	1569596	19747668	4734	30
324	30446413	27803666	60906	55032	27809540	18214028	15684114	1334770	17018884	4750	26
325	31465894	28343916	210389	184045	28370260	19358288	16860930	1583649	18444579	6815	22
326	25577334	23342922	48233	43999	23347156	17122567	14887806	1324724	16212530	4495	18
327	17856334	16248953	45969	41829	16253093	11782502	10221157	907433	11128590	2993	11
328	25365903	23159940	61799	55496	23166243	17543654	15322267	1235406	16557673	4678	15
