# Supplementary material for: Interactive transcriptome analysis of malaria patients and infectingPlasmodium falciparum
Source: HighWire-hosted journal article supplement (doi:10.1101/gr.158980.113), 2014-08-04
Supplement: Supplemental_Table_2.xlsx [file Supplemental_Table_2.xlsx]

## Sheet: (A)Human
Symbol	Definition	Expressed at least one patient (yes=0)	Patient ID: 4	5	6	7	8	9	11	12	13	14	15	16	17	18	19	20	21	22	23	24	25	26	27	28	29	30	31	32	33	34	36	37	38	39	40	41	42	43	44	45	46	47	48	49	50	51	52
NM_018269	1,2-dihydroxy-3-keto-5-methylthiopentene	0	22.07	10.72	11.01	16.51	15.39	12.53	7.26	12.71	5.77	23.56	6.9	15.6	19.25	8.43	38.16	13.25	13.27	10.43	6.99	10.32	19.44	18.18	5.56	17.1	24.4	14.36	37.99	34.35	5.63	15.12	28.02	26.97	19.64	63.81	19.27	14.86	28.96	35.73	43.69	31.91	20.41	10.58	28.1	23.68	22.8	31.01	19.7
NM_001128915,NM_000782	1,25-dihydroxyvitamin D(3) 24-hydroxylase,	1	0	0.01	0	0	0	0	0.01	0	0	0.08	0	0	0	0	0	0	0.02	0	0	0	0	0	0	0	0	0	0	0	0	0	0	0	0.11	0.05	0	0	0	0	0	0.03	0.01	0	0.1	0	0	0	0.03
NM_000158	1,4-alpha-glucan-branching enzyme	0	0.82	2.08	1.17	1.71	1.7	1.02	0.16	1.6	1.89	2.73	0.27	3.18	0	0.82	3.59	2.45	1.67	1.04	1.1	1.17	1.17	2.48	0.13	0.33	0.37	1.32	8.56	1.11	0.13	1.18	1.41	2.91	5.02	6.71	1.69	2.26	3.61	23.3	7.38	7.04	1.79	1.09	2.86	3.62	2.6	3.77	6.69
NM_001040177	1,5-anhydro-D-fructose reductase	0	0.77	0.04	0.23	0	0.13	0.06	0.1	0.2	0	1.16	0.29	0.1	2.5	0.13	0.07	0	0.19	0.34	0.07	0.22	0.21	0.06	0.08	0	0.23	0.19	0.79	0	0	0.04	0.3	0.88	0.36	0.38	0.42	0.15	0.66	0.35	0.31	0.16	0.23	0	1.05	0.45	0.37	0.77	0.27
NM_020132,NM_001037553	1-acyl-sn-glycerol-3-phosphate acyltransferase	0	23.99	8.62	10.23	24.65	14.85	8.31	2.46	3.83	4.41	14.33	4.26	6.41	18.97	6.53	26.93	15.67	13.03	7.43	7.72	10.49	9.9	8.34	3.86	14.29	12.25	18.51	42.91	43.64	5.39	9.94	16.33	15.04	13.23	12.71	6.36	4.77	20.52	30.98	29.25	20.74	13.2	9.32	24.88	27.14	9.79	24.77	14.37
NM_032741,NM_006411	1-acyl-sn-glycerol-3-phosphate acyltransferase	0	3.76	0.77	1.3	2.94	0.98	0.67	0.09	0.33	0.16	1.05	0.25	0.62	0.83	0.43	2.03	1.19	1.74	0.48	0.61	0.98	0.81	0.58	0.54	0.76	0.6	1.47	1.07	2.29	0.28	0.69	0.83	1.05	0.14	0.33	0.33	0.61	1.55	1.33	1.61	0.95	0.56	0.48	2.17	1.88	0.89	1.36	1.77
NM_020133	1-acyl-sn-glycerol-3-phosphate acyltransferase	0	2.02	0.46	0.43	0.88	0.81	0.24	0.4	0.45	2.63	3.28	0.57	1.33	1.85	0.57	1.73	0.91	1.36	0.88	0.32	0.94	0.72	1.15	0.31	0.9	1.32	0.96	1.52	2.68	0.43	0.64	0.78	0.96	0.86	1.6	1.65	1.75	1.22	4.15	1.77	1.64	1.43	0.64	2.88	2.1	0.82	5.25	1.16
NM_018361	1-acyl-sn-glycerol-3-phosphate acyltransferase	0	2.34	0.7	0.37	1.22	0.59	0.28	0.11	0.88	6.2	7.92	0.17	0.92	1.2	0.41	2.01	0.14	2.06	0.71	0.31	0.27	1.1	1.04	0.14	0.09	0.52	0.39	3.79	1.03	0.04	0.75	1.16	0.94	0.61	7.35	2.23	4.68	3.19	4.5	2.82	1.25	0.54	0.45	3.24	1.81	1.63	2.18	2.15
NM_006412,NM_001012727	1-acyl-sn-glycerol-3-phosphate acyltransferase	0	26.72	16.15	24.83	49.94	26.03	20	24.1	15.59	12.29	9.08	18.74	23.86	51.55	29.85	96.7	43.93	24.16	17.54	28.24	29.55	39.7	54.79	21.06	50.56	54.38	37.71	55.13	132.96	31.87	27.78	53.66	54.7	29.97	15.44	16.33	20.38	28.09	35.45	49.23	38.68	16.04	24.65	16.88	43.51	6.29	24.14	34.26
NM_016006	1-acylglycerol-3-phosphate O-acyltransferase	0	3.64	2.56	5.43	7.01	5.61	3.26	0.63	2.32	2.92	3.78	0.47	5.53	4.44	2.09	22.65	10.38	3.48	2.47	3.13	4.14	4.23	8.67	0.67	1.95	3.55	1.64	8.49	8.7	1.22	2.76	4.07	15.96	16.88	15.2	3.23	10.05	7.69	24.57	25.47	16.1	5.63	3.12	4.08	8.06	3.87	10.21	24.24
NM_001031854	1-aminocyclopropane-1-carboxylate synthase-like	1	0	0	0.02	0	0	0.02	0	0	0	0	0	0	0	0	0.18	0	0.02	0.01	0	0.06	0	0	0	0	0	0	0	0	0.06	0.03	0	0	0	0	0.04	0	0	0	0	0.04	0	0	0	0	0	0	0.12
NM_001127219,NM_032592	1-aminocyclopropane-1-carboxylate synthase-like	0	6.62	0.36	0.6	3.05	1.21	2.27	4.75	0.23	1.3	2.46	6.39	1.35	43.41	1.06	1.96	5.06	8.61	1.88	0.74	1.59	1.08	1.9	0.58	6.31	1.81	1.36	4.17	2.6	3.12	1.84	1.66	0.97	8.28	1.92	1.73	1.3	4.4	1.01	1.34	0.54	6.21	0.93	3.73	12.07	1.02	26.07	2.98
NM_001178000,NM_015040,NM_152671	1-phosphatidylinositol-3-phosphate 5-kinase	0	4.05	0.97	0.21	1.23	0.98	0.22	0.19	0.41	3.37	5.41	0.22	2.14	1.67	0.51	2.22	0.7	1.58	0.8	0.49	1.4	0.78	1.36	0.09	0.29	0.57	0.42	2.59	0.74	0.04	0.94	0.77	1.01	2.51	4.54	3.14	11.39	4.37	13.44	6.3	6.19	2.31	1.47	4.54	4.92	1.36	3.12	4.33
NM_014638	1-phosphatidylinositol-4,5-bisphosphate	0	0.96	0.79	0.39	1.69	0.79	0.3	0.27	0.22	0.55	1.13	0.91	1	2.96	0.44	1.14	0.44	2.17	0.89	0.34	2.42	0.5	0.56	1.29	1.3	2.34	2.46	4.43	1.16	0.13	1.69	0.83	0.09	0.18	0.09	0.36	1.14	1.1	0.98	0.47	0.49	0.16	0.2	3.12	1.81	0.2	0.79	0.95
NM_016341,NM_001165979	1-phosphatidylinositol-4,5-bisphosphate	1	0	0.02	0.01	0	0	0	0.02	0	0.02	0.19	0.02	0.01	0	0.01	0.09	0.02	0.04	0.02	0	0.02	0.02	0.04	0	0	0.02	0	0.15	0.09	0	0	0.02	0	0	0.13	0.1	0.04	0.09	0	0.05	0	0.03	0.01	0.03	0	0.02	0.06	0.04
NM_000932,NM_001184883	1-phosphatidylinositol-4,5-bisphosphate	0	1.9	1.23	1.12	7.15	1.72	1.3	1.27	0.53	1.24	0.54	0.93	0.91	2.87	1.48	3.38	1.73	1.52	1.18	1.06	2.71	1.52	1.83	0.94	3.09	3.12	3.09	5.01	5.13	1.42	1.9	2.18	1.32	1.4	0.94	1.1	2.61	2.8	1.65	2.97	1.67	1.59	1.8	2.7	2.91	1.24	4.11	2.13
NM_033123	1-phosphatidylinositol-4,5-bisphosphate	1	0	0	0	0	0	0	0	0	0	0.06	0	0	0	0	0	0	0	0	0	0	0	0	0	0	0	0	0	0	0	0	0	0	0	0	0	0	0	0	0	0	0	0	0	0	0	0	0
NM_004573	1-phosphatidylinositol-4,5-bisphosphate	0	32.84	9.94	22.84	55.16	27.53	18.15	8.57	6.04	6.19	13.98	12.45	11.16	57.76	23.47	35.81	41.44	28.04	24.93	24.56	34.75	17.09	37.67	13.78	50.87	71.67	23.66	58.36	84.08	12.62	24.81	28.84	20.23	81.73	25.71	14.67	12.51	45.43	22.16	53.86	28.12	28.72	21.22	51.82	56.87	20.29	114.98	82.32
NM_002661	1-phosphatidylinositol-4,5-bisphosphate	0	15.9	18.18	20.76	32.01	14.49	25.94	2.45	5.04	7.71	16.09	3.23	16.55	17.12	7.58	23.96	17.61	16.19	6.54	9.57	12.3	15.04	20.92	4.57	9.09	17.69	20.29	44.22	41.42	2.08	6.08	11.99	51.43	39.39	32.91	11.26	11.28	22.22	20.74	36.92	14.25	8.71	6.39	48.55	24.85	15.2	55.06	32.25
NM_133373	1-phosphatidylinositol-4,5-bisphosphate	0	0.55	0.25	0.29	1.44	0.06	0.24	0.29	0.13	0.51	0.32	0.22	0.12	1.11	0.48	0.8	0.16	0.28	0.42	0.28	0.32	0.35	0.46	0.15	0.8	0.78	0.87	1.71	0.63	0.19	0.85	0.68	0.28	0.25	0.43	0.46	0.96	0.48	0.63	0.72	0.6	0.3	0.8	0.49	0.58	0.16	0.65	0.35
NM_032726	1-phosphatidylinositol-4,5-bisphosphate	0	0.6	0.47	0.57	1.04	0.27	0.36	0.09	0.13	0.29	0.89	0.03	0.4	0.65	0.21	0.8	0.19	0.51	0.38	0.28	0.42	0.45	0.45	0.12	0	0.7	0.83	0	1	0.19	0.04	0.2	0.31	0.29	1.05	0.5	0.08	1.25	0.54	0.81	0.43	0.3	0.42	1.13	0.71	0.76	1.67	0.74
NM_015192,NM_182734	1-phosphatidylinositol-4,5-bisphosphate	0	0.36	0.01	0.04	0.15	0.03	0.06	0.07	0	0.11	0.11	0.07	0.01	0.28	0.05	0.43	0.02	0.09	0.11	0.04	0.13	0.05	0.06	0	0	0	0.01	0	0	0.02	0.06	0.04	0.11	0.39	0.33	0.08	0.08	0.58	0.48	0.43	0.13	0.13	0.05	0.12	0.36	0.05	0.14	0.14
NM_001172646,NM_182797,NM_000933	1-phosphatidylinositol-4,5-bisphosphate	1	0.05	0	0	0	0.04	0	0.01	0	0	0.02	0.1	0.01	0	0	0	0	0	0	0.01	0.06	0.01	0.03	0	0	0	0	0	0	0	0	0	0	0	0.05	0.05	0	0.04	0	0	0.07	0.01	0	0	0	0.01	0	0
NM_002660,NM_182811	1-phosphatidylinositol-4,5-bisphosphate	0	7.76	6.45	6.21	11.69	8.2	2.85	2.41	2.2	6.05	13.2	1.69	3.55	17.77	3.33	6.37	3.54	15.93	6.73	3.29	4.77	3.95	2.22	3.9	10.34	9.58	8.29	47.32	8.09	0.33	5.92	6.45	3.55	3.91	6.33	7.55	5.98	19.91	6.56	11.02	3.27	3.16	3.71	17.17	11.97	13.18	24.37	15.07
NM_006225,NM_001130964	1-phosphatidylinositol-4,5-bisphosphate	0	5.3	1.89	1.57	6.24	1.5	1.52	1.4	1.49	3.5	2.94	1.54	1.58	10.27	1.39	3.27	1.59	3.88	2.85	1.89	1.9	2.97	3.43	1.65	3.34	4.62	2.18	5.26	6.33	0.89	5.38	4.68	1.36	2.72	5.21	3.56	4.62	5.74	5.39	4.11	4.34	4.32	4.28	6.54	5.89	1.79	7.06	4.74
NM_001130961,NM_001130960,NM_014996	1-phosphatidylinositol-4,5-bisphosphate	1	0	0	0	0.14	0	0	0	0	0	0.03	0	0.01	0	0	0.12	0	0.01	0	0.01	0.03	0.01	0.02	0	0	0	0.03	0.19	0	0	0	0.02	0.15	0	0.05	0	0	0.01	0	0	0.04	0.02	0.01	0	0.03	0.01	0	0.04
NM_002157	10 kDa heat shock protein, mitochondrial	0	6.26	9.31	9.81	3.25	27.08	6.3	1.86	9.89	6.33	14.25	1.57	6.81	17.96	4.54	25.55	15.34	7.49	4.08	2.58	5.32	21.69	8.45	9.34	9.11	13.61	13.48	115.24	19.06	0.65	4.8	10.49	23.85	0.32	3.43	1.27	1.07	2.82	4.91	5.41	4.04	1.22	1.04	3.37	3.4	7.41	4.54	6.51
NM_012190	10-formyltetrahydrofolate dehydrogenase	1	0	0	0	0	0	0	0	0	0.03	0.05	0.06	0.03	0	0	0.04	0	0	0	0	0.02	0	0	0	0	0	0	0	0	0	0	0	0	0	0	0	0.03	0	0	0	0	0	0	0	0	0	0	0
NM_002905	11-cis retinol dehydrogenase	0	3.52	1.4	4.23	2.23	4.07	3.43	1.72	1.32	3.38	2.89	1.89	1.42	8.42	1.32	5.02	7.16	1.73	1.37	2.08	3.13	1.79	3.12	3.34	1.3	2.15	2.87	25.99	10.88	0.67	1.11	1.46	8.15	3.8	2.33	2.32	2.94	3.92	8.66	5.65	3.82	1.93	2.32	2.05	2.98	1.17	6.75	5.34
NM_004247,NM_001142605	116 kDa U5 small nuclear ribonucleoprotein	0	19.85	9.77	12.58	31.37	9.28	11.21	6.71	5.23	8.57	22.88	4.07	6.46	12.68	6.58	20.32	9.09	15.4	7.9	7.49	7.86	9.03	9.57	5.7	12.86	14.25	16.33	25.69	23.12	5.82	11.62	16.99	11.47	20.75	19.03	12.36	7.84	22.71	18.33	27.19	19.41	14.38	13.7	37.98	15.5	24.11	50.64	15.72
NM_001135861,NM_014172	14 kDa phosphohistidine phosphatase isoform 2	0	25.08	15.77	14.38	24.88	20.97	16.25	30.74	21.67	5.88	24.82	33.76	25.65	29.06	22.4	51.54	22.25	28.05	13.89	7.61	19.83	33.99	23.3	23.17	31.67	50.29	29.49	51.3	47.2	16.7	19.3	35.92	20.83	28.03	47.55	28.85	15.75	39.11	17.66	30.01	24.33	11.8	12.33	42.94	35.17	17.28	38.95	14.26
NM_139323,NM_003404	14-3-3 protein beta/alpha	0	57.55	35.54	60.61	94.03	58.22	41.12	21.19	27.62	22.88	90.9	15.69	48.95	60.9	28.18	118.48	91.32	58.54	31.41	33.48	24.58	42.28	53.65	12.39	38.06	45.58	46.32	142.75	144.95	8.6	33.09	65.92	138.07	97.39	114.16	47.87	42.43	101.81	235.35	183.04	124.51	55.37	50.79	109.07	98.32	84.21	178.3	140.49
NM_006761	14-3-3 protein epsilon	0	38.98	23.95	28	41.09	27.92	28.18	13.46	23.42	14.89	44.27	16.61	27.17	20.55	14.18	70.23	23.04	27.71	11.88	11.6	17.48	30.8	23.1	11.91	24.63	32.52	32.56	79.15	54.77	10.77	17.15	42.59	54.68	68.86	98.59	30.58	50.75	54.74	105.04	102.95	88.77	28.06	23.7	56.68	35.97	66.59	63.77	33.91
NM_003405	14-3-3 protein eta	0	63.31	33.43	28.45	62.95	29	33.91	4.27	18.09	10.18	23.2	6.87	30.51	16.94	13.26	65.98	25.58	48.53	15.86	11.69	32.48	36.33	59.73	7.09	16.66	20.78	39.09	49.44	59.35	9.39	24.57	31.92	68.49	26.38	53.93	14.9	53.87	47.37	37.86	70.73	49.47	16.57	10.61	57.39	35.1	55.25	72.51	36.4
NM_012479	14-3-3 protein gamma	0	11.54	8.68	6.38	31.2	9.57	2.8	1.96	7.93	3.61	13.99	2.22	9.76	7.03	6.96	34.21	9.54	10.01	5.13	3.62	5.95	12.3	8.68	1.03	3.84	3.6	7.9	26.14	9.18	2.03	7.52	8.81	11.99	21	60.22	9.79	11.39	24.83	27.62	45.5	27.52	6.66	3.58	23.62	11.13	18.76	19.52	23.27
NM_006142	14-3-3 protein sigma	0	10.48	0.26	0.4	0.17	0.46	0.27	1.44	3.12	3.83	2.46	0.92	3.48	4.54	1.46	7.13	4.38	2.28	1.58	4.31	3.31	0.99	4.85	4.12	4.36	8.86	2.45	5.07	22.12	0.03	3.91	4.48	0.9	14.8	5.2	8.9	32.32	8.24	32.09	12.52	10.68	3.53	13.94	1.17	10.61	0.87	5.16	7.53
NM_006826	14-3-3 protein theta	0	20.26	8.11	7.06	10.63	9.31	2.99	1.27	10.22	8.76	28.29	1.59	5.8	5.46	3.48	15.46	5.34	18.68	7.88	3.03	6.41	6.93	6.08	2.62	7.14	7.48	8.95	21.01	9.09	0.41	19	9.42	3.6	4.55	26.74	14.01	20.54	15.08	30.94	23.64	23.36	13.75	8.6	30.55	20.06	19.8	16.23	13.2
NM_001135699,NM_145690,NM_003406,NM_001135702,NM_001135700,NM_001135701	14-3-3 protein zeta/delta	0	11.13	6.57	3.67	13.34	7.63	2.49	1.19	7.04	9.13	23.87	1.61	9.98	12.22	2.95	21.83	9.54	11.76	5.23	3.77	5.61	5.41	6.85	1.06	2.61	4.31	6.27	19.51	16.16	0.38	5.95	7.28	12.26	7.42	26.63	12.21	16.87	14.76	57.36	25.27	28.55	9.68	7.07	17.88	15.69	10.38	15.52	18.31
NM_004261,NM_203341	15 kDa selenoprotein isoform 1 precursor	0	30.86	23.74	15.83	31.83	33.43	9.77	4.14	29.93	44.22	81.68	4.32	46.62	46.65	14.24	92.49	28.75	44.54	22.4	17.24	21.3	33.98	36.94	4.4	14.54	23.25	15.71	88.22	37.36	2.87	23.05	33.69	33.34	53.09	180.92	63.57	83.56	91.84	225.52	129.72	169.79	50.35	36.19	57.35	79.55	43.4	61.11	67.68
NM_001145816,NM_000860	15-hydroxyprostaglandin dehydrogenase [NAD+]	0	2.26	0.85	0.25	0.2	1.23	0.15	0.31	4.38	4.7	2.56	0.14	2.1	0.74	0.19	3.86	0.91	4.57	1.19	0.21	0.8	1.81	0.83	0.5	0	0.31	1.16	3.12	0.22	0.01	1.95	0.87	1.45	0.43	7.61	3.47	3.77	6.39	50.09	5.21	6.74	1.99	1.12	2.1	1.97	9.24	3.04	3.47
NM_001136230,NM_178135	17-beta-hydroxysteroid dehydrogenase 13 isoform	0	0	0.13	0.15	0	0.34	0.18	0.02	0.07	0.19	0.57	0.08	0.34	0	0.06	0.93	0.14	0.16	0.1	0.11	0.35	0.11	0.19	0	0	0.11	0.05	0.41	0.72	0	0	0.26	0	0.36	0.93	0.56	0.46	0.58	1.27	1.1	1.09	0.44	0.22	0.2	1.46	0.5	0.51	0.78
NM_016246	17-beta-hydroxysteroid dehydrogenase 14	0	0.51	0.22	0.16	0.27	0	0.13	0.36	0.08	0.64	1.61	0	0.33	2.68	0.01	0	0	0.27	0.11	0.13	0.29	0.21	0.2	0.16	0.55	0.33	0.49	0	0.76	0.03	0.16	0.11	0	0.47	0.13	0.65	0.41	0.19	0.22	0.2	0.07	0.06	0.21	0.13	0.39	0.21	1.33	0.41
NM_003725	17-beta-hydroxysteroid dehydrogenase type 6	0	0.22	0.16	0.19	0	0	0.07	0	0.71	0	0	0	0.3	0.46	0.14	0.21	0	0.23	0.14	0.07	0	0.17	0.13	0.03	0	0.12	0	0.19	1.24	0	0.13	0	0.17	0.39	0.98	0.31	0.05	1	0	0	0.12	0.07	0	0.51	0.16	0.54	0	0.19
NM_033396	182 kDa tankyrase-1-binding protein	0	1.83	0.76	0.5	1.92	0.42	0.41	0.35	0.05	0.62	3.21	0.27	0.13	0.46	0.16	0.53	0.12	0.76	0.25	0.34	0.49	0.41	0.17	0.27	0.33	0.66	1.14	2.22	0.79	0.17	0.96	0.39	0.2	0.22	0.33	0.9	1.87	1.06	1.24	0.81	0.37	0.43	1.03	1.54	0.52	0.4	1.16	0.45
NM_014811	1A6/DRIM (down-regulated in metastasis)	0	0.51	0.3	0.37	1.75	0.9	0.24	0.04	0.1	0.11	0.17	0.12	0.39	0.65	0.35	1.1	0.37	0.42	0.22	0.2	0.53	0.37	0.62	0.19	0.54	0.46	0.51	0.92	2.12	0.14	0.22	0.36	0.15	0.36	0.6	0.15	0.1	0.54	0.44	0.81	0.54	0.21	0.33	1.18	0.42	0.34	0.74	0.26
NM_033133	2',3'-cyclic-nucleotide 3'-phosphodiesterase	0	10.86	12.52	15.95	42.46	12.57	10.27	3.09	8.53	6.78	21.72	3.09	11.02	14.62	7.61	25.9	11.61	14.96	7.44	6.7	10.4	13.94	9.93	6.11	14.19	17.2	18.97	49.35	93.33	4.24	8.53	17.05	30.34	12.72	24.99	8.55	6.46	22.16	34.97	24.42	16.18	9.13	9.33	24.49	15.66	17.8	31.29	14.69
NM_177966	2',5'-phosphodiesterase 12	0	3.61	1.2	0.6	2.27	1.07	0.53	0.64	1.11	1.62	6.52	0.52	2.32	0.37	0.58	2.6	0.72	2.41	0.88	0.65	0.83	1.52	1.08	0.31	0.43	1.1	1.12	2.57	1.48	0.17	1.61	1.08	2.24	3.58	11.61	5.09	2.99	4.87	8.85	7.49	5.26	1.77	1.7	4.67	2.81	3.61	3.4	2.87
NM_001032409,NM_002534,NM_016816	2'-5'-oligoadenylate synthase 1 isoform 3	0	13.76	66.27	265.75	647.72	167.64	37.4	2.43	22.39	6.07	10.03	2.08	30.36	33.32	24.27	125.04	89.99	83.77	24.28	108.55	66.55	42.04	56.15	20.45	49.9	62.99	83.11	579.18	1559.75	16.59	19.38	42.6	662.42	83.91	85.22	10.07	7.92	196.13	561.03	353.05	147.28	40.37	36.48	65.09	107.8	69.01	221.33	98.39
NM_001032731,NM_002535,NM_016817	2'-5'-oligoadenylate synthase 2 isoform 3	0	11.01	30.01	62.84	305.61	31.99	19.6	1.29	10.19	5.9	20.21	2.1	28.37	18.97	8.09	49.24	18.1	38.34	10.73	29.54	12.41	17.98	15	6.83	13.22	14.04	40.62	192.98	537.76	4.22	9.7	22.66	210.06	21.18	42.01	5.01	3.75	85.34	213.41	157.99	45.4	13.03	16.4	57.27	37.14	34.33	99.18	46.21
NM_006187	2'-5'-oligoadenylate synthase 3	0	7.71	11.22	30.02	233.68	18.88	5.25	0.39	2.6	2.67	7.36	0.61	10.78	7.13	1.9	21.24	12.52	13.35	4.31	17.38	9.25	4.6	8.34	1.88	6.31	6.33	24.48	132.23	348.81	1.04	7.64	6.93	118.41	11.65	13.16	4	2.09	45.85	249.36	85.3	44.68	9.04	13.28	14	21.61	8.89	31.66	48.31
NM_001359	2,4-dienoyl-CoA reductase, mitochondrial	0	22.79	30.46	43.06	51.63	48.48	37.84	9.76	19.62	6.23	25.77	8.79	57.4	48.5	20.09	99.25	52.63	54.36	27.05	31.78	24.72	34.29	50.41	16.01	22.47	44.75	36.6	152.4	136.4	10.51	24.71	60.31	124.78	132.77	124.48	26.98	12.65	135.78	141.31	181.45	107.93	43.71	21.01	66.69	69.43	74.84	114.55	62.86
NM_021133	2-5A-dependent ribonuclease	0	0.46	5.78	6.06	11.06	9.18	2.21	0.02	1.32	0.23	0.72	0	5.58	2.5	1.6	14.87	6.79	5.01	2.4	4.66	2.88	3.48	6.53	0.68	0.54	3	4.24	26.31	15.27	0.16	0.85	3.63	23.83	8.06	6.51	0.63	0.85	8.73	28.66	36.07	11.14	2.36	0.88	5.28	6.31	4.24	7.38	12.15
NM_001101426,NM_001101417	2-C-methyl-D-erythritol 4-phosphate	0	0.12	0.03	0.01	0	0	0	0	0	0.02	0	0.03	0.02	0	0	0.04	0	0.01	0.01	0	0.02	0.03	0.03	0	0	0.02	0	0	0	0	0.02	0	0	0	0.16	0.02	0	0.04	0.19	0.05	0.13	0.01	0.01	0.12	0.03	0.04	0.03	0.03
NM_058165	2-acylglycerol O-acyltransferase 1	1	0	0.09	0	0	0	0	0	0	0	0	0	0.04	0	0	0.11	0	0	0	0	0	0	0	0	0	0	0	0	0	0	0	0.32	0	0	0	0	0	0	0	0.24	0	0.03	0	0	0	0	0	0
NM_025098	2-acylglycerol O-acyltransferase 2	1	0	0	0	0	0	0	0	0	0	0	0	0	0	0	0	0	0.03	0	0	0	0	0	0	0	0	0	0	0	0	0	0	0	0	0	0	0	0	0	0	0	0	0	0	0	0	0	0
NM_178176	2-acylglycerol O-acyltransferase 3	0	0	0	0	0	0	0	0	0	0	0	0	0	0	0	0	0	0	0.02	0	0.02	0	0	0	0	0	0	0	0	0	0	0	0	0	0	0	0.06	0	0	0	0	0	0	0	0	0	0	0
NM_138326	2-amino-3-carboxymuconate-6-semialdehyde	0	0	0.17	0.03	0.09	0	0.02	0.2	0	0.14	0.21	0.3	0.29	2.13	0.18	0.44	0	0.12	0.07	0.13	0.14	0.14	0.08	0.03	0	0	0.08	0	0	0.03	0	0	0.18	0.25	0	0.32	0	0.57	0.22	0.2	0	0	0.17	0	0	0.15	0.65	0.05
NM_014291,NM_001171690	2-amino-3-ketobutyrate coenzyme A ligase,	0	4.17	0.39	0.69	0.27	2.92	0.33	0.88	0.42	0.16	2.78	9.74	1.12	11.57	0.4	1.69	2.82	0.53	0.2	0.51	0.21	0.34	0.28	0.57	3.98	0.61	0.45	1.2	2.07	0.19	1.24	0.71	0.72	4.52	0.18	0.28	0.36	1.55	0.82	1.07	0.76	0.54	0.31	1.94	2.85	0.32	3.23	2.15
NM_032804	2-aminoethanethiol dioxygenase	0	3.11	1.79	1.5	4.69	3.29	0.76	0.52	0.83	2.3	7.46	0.55	2.1	4.07	1.26	9.82	1.26	4.77	2.01	0.86	1.5	3.28	2.29	0.18	1.21	1.68	1.84	9.56	3.82	0.47	2.9	2.53	4.01	4.41	8.17	3.1	3.15	4.32	4.38	7.02	8.42	4.13	2.17	4.39	4.89	2.22	2.1	1.93
NM_012260	2-hydroxyacyl-CoA lyase 1	0	5.56	3.72	1.22	3.82	4.37	1.99	1.53	2.35	7.77	14.01	0.74	5.68	4.54	1.99	11.78	1.96	6.88	3.09	1.95	1.74	4.04	3.64	0.94	2.58	2.89	2.71	7	4.47	0.52	3.96	7.73	4.32	7.24	11.2	7.63	7.93	10.36	7.2	9.43	8.69	4.78	4.67	9.94	8.99	5.78	14.18	4.54
NM_001128174,NM_003360	2-hydroxyacylsphingosine	1	0.22	0	0	0.08	0	0.02	0	0	0.03	0.43	0	0.04	0	0	0	0	0.08	0	0	0.05	0	0	0	0	0.04	0	0	0	0	0	0	0	0	0.1	0.14	0	0.16	0.1	0.04	0.15	0	0.03	0.05	0.1	0.01	0.06	0.1
NM_024623	2-oxoglutarate and iron-dependent oxygenase	0	3.76	4.73	5.19	10.37	7.95	4.43	2.09	2.99	1.7	3.59	4.39	5.49	17.12	5.1	12.11	6.25	8.03	4.31	4.06	6.29	6.95	7.27	5.3	8.42	12.27	6.58	28.07	19.02	3.77	4.27	12	8.86	5.63	6.71	2.52	1.93	9.3	6.25	7.67	5.8	2.72	2.59	8.38	9.71	3.14	12.62	5.99
NM_018233	2-oxoglutarate and iron-dependent oxygenase	0	1.57	2.7	2.89	3.81	2.66	2.31	0.6	1.82	1.24	5.15	0.22	3.85	5.46	1.41	6.62	1.84	5.05	1.53	0.98	1.5	3.69	2.3	1.09	1.78	2.66	3.28	8.69	5.39	0.44	1.87	4.13	3.77	2.58	7.52	2.54	1.53	6.26	2.92	5.83	2.31	1.46	1.28	7.28	4.14	6.29	8.57	3.31
NM_001003941,NM_002541,NM_001165036	2-oxoglutarate dehydrogenase, mitochondrial	0	17.42	16.19	21.95	51.64	17.33	13.05	1.41	7.98	4.64	9.7	2.99	7.43	16.66	8.68	22.75	16.65	17.21	11.13	9.27	9.52	13.72	14.7	11.1	21.59	24.37	31.23	54.57	72.37	2.63	10.63	18.43	16.55	23.44	18.84	4.66	8.55	28.91	24.51	40.71	13.79	9.05	6.99	62.05	31.8	32.06	52.99	31.51
NM_001143997,NM_001143996,NM_018245	2-oxoglutarate dehydrogenase-like, mitochondrial	1	0	0.03	0.02	0	0	0.01	0	0	0.04	0.03	0	0.07	0.37	0	0.05	0	0.04	0.01	0	0.02	0.03	0	0	0	0	0.03	0.34	0	0	0	0.04	0	0	0.04	0	0	0.06	0.06	0.07	0	0	0	0	0	0.03	0	0
NM_080818	2-oxoglutarate receptor 1	1	0	0	0	0	0	0	0	0	0	0	0	0	0	0	0	0	0	0	0	0	0	0	0	0	0	0	0	0	0	0	0	0	0	0	0	0	0	0	0	0	0	0	0	0	0	0	0
NM_000709,NM_001164783	2-oxoisovalerate dehydrogenase subunit alpha,	0	26.16	13.71	11.48	45.04	12.5	11.67	14.72	5.77	18.28	25.06	13.78	16.22	29.71	11.2	35.61	16.07	21.51	14.89	15.49	12.57	14.97	17.57	13.42	26.72	35.72	24.26	40.22	50.19	16.12	33.5	32.65	16.27	37.46	24.11	31.85	22.14	33.86	33.77	34.53	37.9	25.57	25.02	40.76	32.22	12.21	53.25	23.84
NM_183050,NM_000056	2-oxoisovalerate dehydrogenase subunit beta,	0	0.51	0.3	0.1	0.21	0.38	0.11	0.08	0.28	0.05	0.94	0.02	0.4	0.19	0.1	0.84	0.09	0.83	0.44	0.18	0.16	0.34	0.28	0.07	0.14	0.49	0.39	0.53	0.13	0	0.57	0.43	0.13	0.32	3.32	0.58	0.3	1.88	1.71	0.78	0.7	0.44	0.22	1.23	1.26	0.79	1.56	0.75
NM_014762	24-dehydrocholesterol reductase precursor	0	3.3	3.71	4.84	5.89	1.98	1.97	0.32	2.69	0.11	3.93	0.57	3.11	2.5	1.05	5.85	1.47	6.07	1.1	0.8	1.78	8.19	3.2	2.6	4.46	3.14	9.3	8.79	2.81	0.49	5.18	2.88	2.81	1.76	7.59	2.35	0.36	3.26	2.69	3.67	4.38	3.71	1.02	15.04	2.1	8.85	6.04	2.81
NM_016593	24-hydroxycholesterol 7-alpha-hydroxylase	1	0	0	0	0	0	0	0.04	0	0	0	0	0.02	0	0	0	0	0	0	0	0	0	0	0	0	0	0.05	0	0	0	0	0	0	0	0	0	0	0	0	0	0	0	0	0	0	0	0	0
NM_004820	25-hydroxycholesterol 7-alpha-hydroxylase	1	0	0.03	0.14	0	0	0	0	0	0	0	0	0.02	0	0	0.05	0.07	0	0	0	0	0	0	0	0	0	0	0	0	0	0	0.03	0.09	0.25	0	0	0	0	0.13	0	0.04	0.03	0.03	0	0	0.03	0.09	0
NM_000785	25-hydroxyvitamin D-1 alpha hydroxylase,	0	0.24	0.04	0.03	0	0.08	0.08	0.06	0.06	0.18	0.6	0.34	0.06	0	0.12	0.14	0.07	0.08	0.09	0.02	0.13	0.14	0.02	0.02	0.14	0.14	0.12	0	0	0	0.1	0.08	0	0	0	0.08	0.59	0.04	0.54	0	0.15	0.07	0.03	0.25	0.1	0.3	0	0.15
NM_002806	26S protease regulatory subunit 10B	0	3.35	1.92	0.64	0.97	4.68	0.4	0.23	2.37	2.45	5.17	0.06	3.01	0.83	1.92	7.85	2.73	4.38	2.33	1.61	0.79	5.04	4.35	0.81	0.66	1.87	1.39	5.26	2.36	0.22	2.02	3	7.43	2.08	4.01	1.35	1.34	1.46	5.9	4.9	2.36	0.75	0.76	2.1	1.42	1.91	1.28	2.02
NM_002802	26S protease regulatory subunit 4	0	0.39	0.21	0.23	0.21	0	0.06	0.1	0.11	0.12	0.86	0.12	0.26	0	0.05	0.36	0	0.1	0.1	0.1	0.22	0.16	0.28	0.14	0.1	0.66	0.1	0.28	0.2	0.1	0.12	0.04	0	0.39	1.03	0.39	0.38	0.8	2.25	0.63	0.95	0.57	0.35	0.67	0.94	0.23	0.14	0.23
NM_002804	26S protease regulatory subunit 6A	0	42.64	21.49	24.17	26.67	24.22	22.27	23.74	21.05	18.61	53.57	23.26	23.99	41.74	15.74	45.82	18.28	25.33	11.58	9.57	15.94	27.97	19.46	22.98	36.58	45.29	36.05	69.35	61.46	13.5	26.57	43.27	39.22	41.65	49.7	36.68	27.33	45.23	47.65	50.3	43.77	25	26.85	61.22	34.58	53.92	69.13	23.05
NM_153001,NM_006503	26S protease regulatory subunit 6B isoform 2	0	39.8	30.31	46.89	48.09	33.18	38.66	19.06	18.06	31.02	61.58	27.79	27.64	38.13	19.51	62.12	39.67	39.11	17.59	21.48	27.44	34.96	25.74	26.07	49.89	62.39	53.03	128.1	87.2	14.24	23.86	42.82	61.23	74.34	63.92	48.51	40.7	76.31	95.28	84.78	59.68	33	31.29	76.12	48.59	68.32	109.73	53.18
NM_002803	26S protease regulatory subunit 7	0	16.02	20.27	12.19	13.33	25.61	8.97	6.6	35.6	31.39	60.36	6.42	32.39	27.67	19	82.31	21.41	29.98	12.19	8.72	8.45	47.95	32.76	7.53	12.17	17.4	13.68	69.29	28.09	2.34	11.16	34.26	40.14	33.16	111.68	39.34	38.22	41.72	54.57	71.78	37.77	20.35	18.64	37.24	21.42	40.1	33.11	14.48
NM_002805	26S protease regulatory subunit 8	0	43.48	42.17	58.52	57.53	53.61	56.65	27.34	25.11	24.44	59.45	20.79	38.41	54.42	28.58	92.59	44.05	62.89	27.56	25.16	43.12	57.09	42.93	27.95	54.73	74.8	55.43	137.34	105.54	20.88	44.1	83.96	96.46	87.14	105.12	56.12	33.78	124	117.91	130.62	70.25	44.95	41.36	120.25	74.34	117.49	201.7	63.99
NM_006304	26S proteasome complex subunit DSS1	0	32.86	12.6	5.98	2.9	37.78	7.41	9.42	46.3	19.63	59.98	7.53	40.44	50.54	19.77	60.04	18.56	27.68	13.94	7.43	17.46	58.32	39.82	13.92	50.37	46.31	20.39	80.31	47.61	1.95	12.7	19.15	63.42	15.7	52.08	17.62	10.69	23.03	21.69	32.45	31.35	12.22	11.19	36.66	12.58	24.72	38.5	9.63
NM_002807,NM_001191037	26S proteasome non-ATPase regulatory subunit 1	0	4.24	3.75	3.08	6.29	2.79	2.2	0.2	0.72	0.93	7.19	0.68	0.85	0.56	1.14	4.54	2.01	4.15	1.46	1.88	1.19	2.23	2.1	0.54	0.83	1.28	3.9	5.33	2.77	0.07	3.31	3.36	1.99	2.98	3.71	1.03	0.95	6.11	6.82	13.09	5.59	2.61	2.15	11.72	5.4	8.32	5.93	5.78
NM_170750,NM_002814	26S proteasome non-ATPase regulatory subunit 10	0	8.5	4.26	2.81	2.93	6.77	1.48	0.47	4.65	5.84	16.43	0.12	6.19	3.79	2.03	13.13	3.03	6.45	2.86	1.48	2.27	4.35	3.19	0.51	2.35	2.05	3.42	17.88	9.51	0.22	3.12	5.02	2.3	3.87	17.86	2.65	6.69	8.21	28	13.34	12.9	5.61	3.2	11.37	8.06	7.64	9.02	7.7
NM_002815	26S proteasome non-ATPase regulatory subunit 11	0	23.01	14.3	13.4	18.2	11.21	10.36	4.62	7.58	11.54	33.95	4.02	9.41	4.17	5.37	22.38	7.65	14.45	4.48	6.26	5.17	15.04	10.72	4.22	4.94	8.36	12.36	23.32	14.85	2.7	12.04	15.14	23.2	13.62	33.16	20.21	17.8	20.21	35.45	32.63	19.01	9.9	11.33	29.88	13.43	27.51	26.24	14.17
NM_174871,NM_002816	26S proteasome non-ATPase regulatory subunit 12	0	11.35	5.77	2.99	5.79	4.82	2.58	3.81	7.02	14.19	23.01	2.91	7.41	5.83	2.81	11.55	4.71	5.52	2.52	2.56	1.54	7.07	5.26	0.86	3.77	2.89	3.95	9.95	5.67	0.3	7.09	5.56	9.62	6.17	19.25	18.12	32.33	8.57	55.29	23.31	27.21	6.98	7.86	10.39	7.38	9.37	5.59	7.3
NM_175932,NM_002817	26S proteasome non-ATPase regulatory subunit 13	0	51.55	42.38	49.73	47.56	53.82	40.05	36.58	30.47	35.91	69.2	31.59	58.09	80.71	31.42	102.18	63.75	55.99	24.65	33.34	31.66	60.34	55.66	34.07	63.87	90.86	60.2	168.12	159.85	22.33	46.41	90.65	118.05	141.55	131.27	71.28	40.5	103.23	155.04	135.75	135.14	58.94	54.77	101.4	92.43	99.43	149.27	65.83
NM_005805	26S proteasome non-ATPase regulatory subunit 14	0	10.96	8.08	4.07	4.9	6.57	4	1.74	13.8	5.99	25.33	0.71	12.99	5.37	5.53	25.3	6.74	12.17	5.74	3.3	4.62	16.87	9.17	2.37	3.54	4.97	4.75	22.57	7.48	0.36	5.85	9.91	14.89	8.21	47.17	12.62	8.43	16.86	20.89	32.92	21.57	7.11	6.02	26.28	12.07	20.88	12.34	8.81
NM_002808	26S proteasome non-ATPase regulatory subunit 2	0	28.52	16.22	17.56	30.62	18.2	13.74	5.39	7.26	14.58	32.8	7.03	9.29	17.4	8.18	28.36	15.13	16.44	8.98	9.09	9.2	17.23	13.24	7.73	18.41	22.93	23.76	45.65	36.71	4.03	14.89	24.58	19.01	19.68	25.65	16.38	14.78	23.3	40.01	38.14	25.63	17.86	20.58	42.66	26.2	33.86	45.96	18.52
NM_002809	26S proteasome non-ATPase regulatory subunit 3	0	48.9	27.46	38.88	48.63	27.21	22.62	7.52	16.65	26.81	61.92	12.43	16.53	27.03	14.45	46.71	24.79	34.2	15.19	18.17	24.47	28.38	20.67	20.07	38.79	45.85	45.56	132.89	66.81	7.93	40.69	40.92	63.01	26.78	35.33	25.84	30.07	48.92	82.85	49.79	48.9	29.13	27.68	63.98	39.4	47.54	63.4	35.4
NM_002810	26S proteasome non-ATPase regulatory subunit 4	0	23.1	17.38	18.43	29.71	33.35	17	5.49	11.43	8	18.17	5.62	22.4	35.17	9.47	38.94	21.99	15.32	7.87	12.34	11.37	18.57	22.04	12.89	25.72	24.99	25.33	57.16	54.37	5.92	11.94	28.18	49.65	50.9	39.21	13.91	12.61	29.91	49.18	40.6	33.28	18.35	14.6	36.8	40.18	28.49	50.52	33.2
NM_005047	26S proteasome non-ATPase regulatory subunit 5	0	3.97	3.16	1.74	4.28	2.8	1.49	0.7	2.18	4.39	10.19	0.99	3.7	7.77	1.66	9.46	1.91	4.53	1.97	1.25	1.04	3.74	3.4	0.79	0.86	1.29	1.95	5.73	3.6	0.33	2.15	5.12	4.19	3.01	14.96	7.83	8.14	6.86	13.95	11.78	7.4	3.94	2.87	6.51	6.57	4.98	6.92	3.73
NM_014814	26S proteasome non-ATPase regulatory subunit 6	0	36.43	21.06	16.61	22.15	28.04	11.63	9.24	18.74	37.78	104.5	9.77	37.12	27.67	12.57	76.16	33.93	30.3	16.08	17.85	16.08	37.57	35.19	7.1	12.07	18.36	19.31	61.23	42.92	2.22	24.33	34.08	83.72	47.82	89.89	44.57	47.4	52.58	157.29	94.61	88.76	31.2	30.03	52.1	43.48	36.53	42.38	46.59
NM_002811	26S proteasome non-ATPase regulatory subunit 7	0	34.74	15.2	13.9	20.99	15.06	10	9.1	14.31	26.4	68.31	9.5	27.3	35.36	9.6	41.4	18.38	22.36	11.44	9.69	10.13	21.92	22.91	4.98	13.07	17.98	17.34	37.05	30.82	4.21	19.28	24.31	33.76	26.85	56.34	34.26	28.7	45.01	78.09	50.84	48.56	21.32	30.64	43.17	34.71	33.39	50.95	26.72
NM_002812	26S proteasome non-ATPase regulatory subunit 8	0	53.38	38.38	42.79	50.05	49.39	32.94	27.01	42.81	32.35	77.21	33.29	47.72	62.57	33.22	110.38	39.41	52.26	24.51	20.22	31.01	60.01	38.65	34.92	61.93	68.02	55.13	128.21	118.67	18.74	45.89	70.69	69.04	68.68	127.89	60.85	31.97	75.34	97.56	82.99	73.21	47.16	44.48	74.41	67.65	72.09	109.45	41.44
NM_002813	26S proteasome non-ATPase regulatory subunit 9	0	30.79	11.57	11.98	14.02	20.47	9.06	5.92	14.75	14.03	39.34	10.43	17.37	40.54	10.49	38.25	20.26	18.1	10.71	8.54	13.56	20.32	18.75	6.5	19.48	24.35	16.01	44.37	33	3.48	14.57	21.7	24.03	18.39	31.5	13.92	15.88	20.11	33.8	32.54	24.11	12.7	11.65	27.72	36.85	13.36	24.99	22.17
NM_014891	28 kDa heat- and acid-stable phosphoprotein	0	16.57	8.63	10.52	12.72	11.85	5.37	3.6	6.09	5.16	15.73	5.44	9	17.68	7.03	22.01	13.18	12.01	6.09	7.02	9.39	11.05	10.89	6.34	15.66	17.61	12.4	27.79	34.39	2.41	12.14	13.07	12.71	19.71	20.19	11.12	4.63	20.17	27.43	22.5	19.74	9.94	11.47	22.45	17.7	12.37	25.33	14.33
NM_018141	28S ribosomal protein S10, mitochondrial	0	1.61	1.36	0.63	1.29	1.88	0.71	0.47	1.19	1.16	6.17	0.61	1.8	1.57	1.14	5.32	1.35	2.66	1.01	0.57	0.74	1.95	1.53	0.34	0.48	1.16	0.8	1.13	1.24	0.29	1.2	1.33	2.54	2.22	9.85	2.7	1.28	4.53	6.56	5.41	4.22	2.11	1.57	3.86	2.56	3.25	3.74	2.74
NM_022839,NM_176805	28S ribosomal protein S11, mitochondrial isoform	0	5.81	11.56	14.98	14.63	16.16	11.51	7.32	16.24	5.47	17.12	10.36	19.91	33.69	13.07	46.13	13.85	21.64	9.3	7.73	13.43	26.93	17.55	12.9	17.6	30.73	17.31	65.63	30.75	9.88	13.26	28.43	26.28	22.15	44.24	12.1	4.52	25.8	17.76	23.29	19.38	10.79	8.5	23.58	19.57	23.23	32.23	9.69
NM_033362,NM_021107,NM_033363	28S ribosomal protein S12, mitochondrial	0	16.62	15.73	17.76	21.81	24.55	14.66	12.66	26.01	13.59	28.61	16.05	27.27	51.46	19.03	63.4	19.12	31.71	14.67	9.8	15.67	42.44	21.69	23.46	36.16	37.41	32.11	91.65	55.57	11.4	21.41	32.96	24.2	9.18	26.1	11.51	12.01	26.57	19.25	25.27	18.29	9.29	12.12	29.99	29.96	18.76	30.75	13.79
NM_022100	28S ribosomal protein S14, mitochondrial	0	4.07	8.81	6.67	5.44	10.84	8.99	1.08	10.55	0.65	6.46	2.25	14.26	8.52	7.7	28.12	5.53	14.89	5.65	2.97	5.49	22.43	12.25	5.49	3.37	10.18	5.37	16.15	13.33	1.76	4.65	12.27	14.25	17.21	70.17	6.36	1.51	23.01	13.79	25.41	15.4	6.31	3.19	20.39	15.5	17.94	20.94	8.86
NM_031280	28S ribosomal protein S15, mitochondrial	0	46.11	25.48	20	11.92	22.75	21.91	38.74	48.48	35.14	66.18	30.64	58.04	111.99	30.8	89.59	40.76	37.72	17.98	11.96	29.12	65.22	37.34	21.48	41	41.14	28.21	73.59	38.26	15.47	23.05	46.49	61.52	42.19	161.68	63.54	60.79	51.7	106.02	54.86	90.58	25.47	22.78	43.07	38.27	45.82	46.16	18.61
NM_016065	28S ribosomal protein S16, mitochondrial	0	9.15	6.43	4.73	6.97	7.04	5.05	2.64	8.06	3.83	14.88	4.42	10.19	12.5	5.13	23.71	6.72	11.58	5.06	3.23	5.11	13.08	8.07	3.79	6.79	8.13	9.13	23.83	13	2.5	6.93	11.77	15.79	12.37	39.56	8.83	4	16.56	16.01	17.43	12.05	7.17	4.98	20.3	14.88	15.32	17.62	9.05
NM_015969	28S ribosomal protein S17, mitochondrial	0	4.84	4.14	4.11	6.64	3.8	4.81	4.15	8.61	1.83	9.17	4.16	9.97	5.65	4.03	13.4	3.4	6.67	3.56	1.74	3.74	11.53	3.88	2.73	6.55	8.65	4.06	23.57	7.24	1.13	2.43	5.71	15.41	1.54	20.88	3.8	3.38	7.2	5.68	7.55	7.35	2.57	2.14	7.35	3.85	10.13	9.87	3.17
NM_018135,NM_001193343	28S ribosomal protein S18a, mitochondrial	0	16.07	15.68	18.83	19.54	16.78	17.64	9.25	10.53	7.74	44.6	12.08	18.6	17.22	14.73	43.71	12.9	20.09	8.25	9.22	12.26	29.26	18.22	16.62	15.61	33.92	24.46	83.09	68.79	12.43	14.06	29.74	37	22.9	54.56	24.88	4.61	29.32	32.02	36.07	20.14	14.03	14.22	25.31	25.17	29.25	46.44	14.93
NM_014046	28S ribosomal protein S18b, mitochondrial	0	0.19	0.95	0.9	1.73	0.93	0.57	0	0.22	0.58	1.13	0	0.37	0	0.23	1.16	0.12	0.79	0.37	0.07	0.25	0.76	0.49	0.25	0.22	1.51	0.89	3.42	0.72	0.23	0.88	1.99	0.15	0	1.45	0.53	0.44	0.83	0.35	0.65	0.24	0.2	0.28	1.79	0	1.5	1.73	0.75
NM_016067	28S ribosomal protein S18c, mitochondrial	0	1.4	3.04	1.74	1.88	5.76	1.24	0.72	3.58	1.82	4.79	0.83	6.25	7.68	2.64	12.95	3.22	5.26	2.08	2.67	1.55	8.06	6.42	1.65	2.18	3.54	3.46	12.79	14.96	0.07	1.67	6.5	12.26	5.88	27.33	4.63	2.83	10.31	17.76	16.52	8.07	4.72	2.04	8.46	4.46	6.44	6.04	6.43
NM_016034	28S ribosomal protein S2, mitochondrial	0	13.35	11.76	12.24	15.37	10.71	11.98	8.63	9.76	7.77	27.4	9.55	10.84	15.36	8.96	23.59	10.91	16.58	8.05	4.8	10.4	15.83	7.49	10.87	18.93	24.16	20.44	53.16	24.43	7.19	13.97	19.92	11.16	11.94	21.81	7.6	5.63	18.84	9.73	15.96	10.99	7.93	9.78	29.86	19.9	20.11	41.22	11.42
NM_031901,NM_018997	28S ribosomal protein S21, mitochondrial	0	28.74	17.85	12.3	8.26	33.07	9.59	21.86	32.02	22.65	38.48	14.02	43.76	97	21.45	67.19	25.21	28.91	16.18	8.6	16.24	57.84	36.96	26.2	40.14	54.42	22.96	107.28	58.69	14.84	15.69	35.7	63.55	33.8	113.95	32.82	22.98	39.15	32.94	31.37	29.54	22.77	14.81	44.63	34.07	32.2	68.71	16.42
NM_020191	28S ribosomal protein S22, mitochondrial	0	14.26	13.46	6.17	6.42	18.88	5.9	5.03	14.61	22.85	65.02	5.83	21.4	17.68	10.25	46.8	14.83	18.9	8.25	5.87	4.89	26.49	20.37	4.89	6.34	10	6.29	30.89	19.41	1.87	7.29	23.09	26.83	17.89	65.61	26.17	32.98	28.83	46.29	45.25	24.81	13.16	13.33	21.69	14.27	19.94	18.69	11.65
NM_016070	28S ribosomal protein S23, mitochondrial	0	8.7	12.4	9.78	8.35	18.11	7.26	2.1	17.84	10.91	36.89	2.69	21.63	28.51	13.45	43.33	11.01	22.36	9.93	6.7	7.62	29.22	20.3	7.3	13.67	12.4	14.58	65.14	27.42	1.72	10.7	30.47	14.69	14.95	61.78	17.02	7.31	28.99	33.99	43.69	29.95	14.32	12.75	26.97	23.55	27.71	24.6	10.99
NM_032014	28S ribosomal protein S24, mitochondrial	0	55.38	33.33	31.17	35.43	47.47	34.59	50.53	51.99	47.71	86.91	51.87	59.93	96.63	43.54	135.43	37.33	47.06	26.26	14.66	31.44	84.43	47.21	37.2	79.53	93.53	46.85	157.83	128.31	27.08	36.67	89.17	75.77	49.86	229.94	70.51	77.16	71.02	68.55	57.83	56.75	41.6	34.43	54.22	60.59	54.66	84.37	31.76
NM_022497	28S ribosomal protein S25, mitochondrial	0	3.64	3.71	2.53	3.49	5.57	1.76	1.09	3.95	5.04	7.44	1.82	4.87	6.94	2.41	9.61	3.05	6.36	3.05	1.57	3.18	6.12	4.01	1.84	3.42	4.01	3.66	17.26	6.02	1.3	1.91	5.7	4.5	6.17	14.43	5.01	6.14	10.39	10.56	11.28	6.8	3.27	2.2	9.24	6.66	5.86	8.31	7.62
NM_030811	28S ribosomal protein S26, mitochondrial	0	9.97	12.92	11.82	17.69	19.42	10.15	2.72	11.8	14.75	18.35	2.15	17.05	28.6	9.83	36.75	6.79	21.81	8.64	5.2	15.78	22.56	11.95	10.81	20.22	25.33	16.58	76.74	36.31	3.14	8.48	22.85	21.42	6.34	21.31	4.79	6.51	17.75	9.29	18.3	10.76	5.73	5.93	19.57	12.97	14.24	20.96	12.08
NM_015084	28S ribosomal protein S27, mitochondrial	0	6.09	6.69	5.7	5.7	6.81	4.51	2.39	5.87	6.56	19.62	2.79	7.5	12.31	4	13.89	3.89	13.03	6.09	2.38	3.05	8.33	6.37	2.97	5.06	6.21	7.28	19.13	6.7	1.42	7.93	8.95	6.99	7.42	24.67	9.22	6.56	15.35	8.94	13.3	7.07	4.17	3.36	24.73	9.25	16.67	14.33	8.66
NM_014018	28S ribosomal protein S28, mitochondrial	0	8	9.86	4.08	4.23	13.98	4.34	0.63	17.15	7.28	32.61	1.99	16.83	27.03	7.4	36.18	5.11	17.38	7.97	5.75	5.38	25.8	19.15	5.79	6.14	14.39	10.41	23.49	13.74	2.09	5.92	16.01	19.77	14.41	78.22	10.85	9.57	29.06	22.26	26.9	16.71	7.57	4.94	21.86	15.92	18.26	16.57	8.28
NM_004632,NM_033657	28S ribosomal protein S29, mitochondrial	0	22.62	16.42	13.92	19.12	19.79	12.78	4.84	12.91	22.77	38.65	6.06	17	45.17	9.98	36.13	13.9	26.38	12.26	8.85	15.98	19.1	17.8	6.13	19.26	22.85	16.63	66.79	30.73	3.65	19.45	25.48	20.08	20.86	43.67	20.99	23.24	37.6	41.98	41.18	26.06	16.49	11.56	44.57	30.73	33.01	53.16	30.22
NM_016640	28S ribosomal protein S30, mitochondrial	0	9.78	2.95	3.24	6.1	5.07	2.69	1.98	5.33	7.28	25.6	2.85	7.18	7.13	2.98	11.24	3.03	11.05	4.21	1.99	3.74	7.23	4.67	1.85	7.17	6.27	6.06	10.78	8.16	0.4	4.9	6.28	2.7	5.02	18.06	9.96	10.97	11.46	17.69	14.1	7.6	5.38	5.13	12.18	8.22	7.48	10.47	6.96
NM_005830	28S ribosomal protein S31, mitochondrial	0	2.1	4.77	1.82	3.63	4.96	3.03	0.42	4.98	1.52	5.87	0.21	7.76	4.91	4.52	16.42	8.77	10.38	5.37	2.72	2.82	10.21	7.82	2.3	2.47	3.85	4.74	14.2	5.61	0.32	0.91	6.06	13.79	5.38	24.07	1.61	1.54	16.81	6.18	23.49	4.28	1.29	1.8	11.54	7.47	13.66	16.11	5.65
NM_016071,NM_053035	28S ribosomal protein S33, mitochondrial	0	7.15	9.48	5.02	1.78	20.82	4.97	4.11	17.51	11.17	21.23	3.25	24.65	23.05	9.2	38.34	4.13	17.18	6.82	2.8	8.02	37.14	17.47	4.13	9.07	15.99	8.38	46.04	4.21	1.35	6.73	9.4	23.81	6.02	81.9	11.19	11.36	16.74	16.3	21.27	13.43	7.23	3.12	22.97	12.71	18.65	11.04	6.7
NM_023936	28S ribosomal protein S34, mitochondrial	0	30.33	41.08	49.06	49.01	57.1	39.91	26.13	46.56	26.16	33.3	34.73	52	86.17	44.15	130.8	35.47	59.39	33.05	22.61	35.75	84.53	51.15	51.75	102	109.32	70.06	183.06	126.43	46.06	50.55	91.48	77.19	49.29	94.97	20.93	27.56	70.86	42.1	60.49	39.15	24.26	21.04	57.03	53.8	42.9	75.8	25.55
NM_001190864,NM_021821	28S ribosomal protein S35, mitochondrial isoform	0	8.6	5.61	3.43	6.13	7.02	2.65	2.29	9.76	6.73	27.25	2.56	11.05	11.85	5.61	21.95	5.62	12.32	6.65	2.99	3.79	11.83	9.47	1.85	3.47	7.13	3.45	20.58	9.49	1.39	7.16	11.05	9.86	8.53	35.49	10.11	10.97	16.31	14.71	21.23	19.14	9.36	6.25	17.58	13.81	12.53	13.53	8.39
NM_033281	28S ribosomal protein S36, mitochondrial	0	1.88	1.97	1.44	1.92	3.18	1.33	0.94	2.69	1.81	5.72	0.98	3.84	1.48	1.71	7.56	3.8	3.38	1.77	1.93	1.96	4.97	3.45	1.04	2.49	4.31	2.62	5.78	3.18	0.47	2.13	5.38	6.23	2.69	11.4	3.09	2.32	3.34	9.13	7.29	5.32	2.96	1.36	3.68	4.14	3.36	4.79	2.63
NM_031902	28S ribosomal protein S5, mitochondrial	0	16.04	11.38	10.38	12.66	16.14	9.84	3.59	7.72	8.48	15.6	3.88	12.11	16.66	8.12	28.89	12.38	12.94	6.71	5.05	14.32	17.58	13.86	7.43	20.28	16.25	15.46	58.06	24.58	4.6	8.05	17.13	26.22	20	31.57	10.89	14.22	28.59	28.25	32.51	18.85	10.25	7.98	21.45	17.73	19.43	40.68	14.65
NM_032476	28S ribosomal protein S6, mitochondrial	0	1.28	3.87	4.27	5.48	9.77	1.69	1.67	2.47	8.85	4.9	1.69	2.75	7.31	2.32	8.11	4.92	6.39	2.81	2.21	2.26	4.07	2.34	4.81	14.19	7.55	9	62.57	15.97	1.18	5.13	3.36	2.15	0.9	1.35	0.61	1.29	1.54	1.11	1.52	1.45	0.49	0.57	1.54	4.04	1.91	2.27	3.09
NM_015971	28S ribosomal protein S7, mitochondrial	0	22.84	18.33	17.21	22.06	22.79	16.23	10.54	22.14	14.41	59.15	8.05	31.5	42.39	19.05	66.89	17.49	31.71	14.63	9.6	15.89	44.45	25.2	12.18	19.52	29.03	21.96	74.68	34.07	7.43	18.68	35.7	27.27	28.57	98.16	23.34	12.45	47.16	34.15	44.56	31.79	21.96	15.55	45.6	38.3	33.03	55.32	19.36
NM_182640	28S ribosomal protein S9, mitochondrial	0	5.16	4.99	4.3	5.17	8.58	5.53	2.07	5.31	5.83	14.61	2.05	7.31	12.68	4.1	14.09	4.34	11.65	4.15	3.23	2.79	8.1	5	3.81	7.62	6.36	7.36	21.88	15.03	1.09	4.19	9.76	6.49	7.2	15.19	5.35	3.46	17.93	7.2	15.8	6.32	3	3.84	13.74	5.99	11.32	21.7	6.27
NM_025193,NM_001142778,NM_001142777	3 beta-hydroxysteroid dehydrogenase type 7	0	1.42	10.95	9.12	2.94	2.73	2.53	1.58	3.94	0.24	0.78	1.35	3.06	0	1.92	7.6	2.19	5.6	0.35	2.51	7.71	7.44	2.36	4.8	2.42	2.89	11.41	14.46	8.75	5.46	4.5	4.13	18.04	0.68	2.68	2.09	1.43	5.9	10.08	10.73	11.18	6.03	3.13	5.72	3.04	3.91	2.5	1.09
NM_001166120,NM_000198	3 beta-hydroxysteroid dehydrogenase/Delta	0	0	0	0	0	0	0	0	0	0	0	0	0	0	0	0	0	0	0	0	0	0	0	0	0	0	0	0	0	0	0	0	0	0	0	0	0	0	0	0	0	0	0	0	0	0	0	0
NM_000862	3 beta-hydroxysteroid dehydrogenase/Delta	1	0	0	0	0	0	0	0	0	0	0.08	0	0.03	0	0	0	0	0	0	0	0	0	0	0	0	0	0	0	0	0	0	0	0	0	0	0	0	0	0	0	0	0	0	0	0	0	0	0
NM_006085	3'(2'),5'-bisphosphate nucleotidase 1	0	0.77	3.51	1.16	1.84	4.92	1.05	0.15	3.18	2.48	5.31	0.23	3.6	1.85	1.41	6.71	1.68	5.78	2.4	1.11	1.08	4.71	4.07	0.85	1.62	1.87	2.64	17.76	3.18	0.09	0.81	3.49	1.93	2.19	13.16	1.81	2.16	7.63	10.3	11.4	3.09	1.82	0.77	6.39	5.27	4.41	5.59	2.9
NM_153332	3'-5' exoribonuclease 1	0	1.49	2.11	1.59	1.7	2.75	0.6	0.16	3.72	1.46	3.4	0.16	4.13	2.04	0.78	5.98	2.38	3.81	1.17	1.77	1.52	2.54	2.04	0.97	0.35	1.16	1.89	7.7	6	0.1	2.62	1.32	7.54	1.86	10.13	3.43	8.61	7.99	42.07	21.01	16.64	2.31	1.34	5.65	3.36	7.37	3.35	4.55
NM_016046	3'-5' exoribonuclease CSL4 homolog	0	11.73	15.61	10.29	14.05	15.95	14.42	6.84	21.62	6.78	14.84	6.17	23.28	33.88	14.48	43.69	11.31	22.49	10.56	7.67	13.28	29.93	17.58	8.49	22.64	24.64	17.47	43.92	35.11	6.72	10.18	30.23	32.73	22.9	76.88	13.87	7.66	32.88	21.37	34.15	24.03	15.66	8.39	30.71	24.33	24.51	36.62	10.49
NM_001178029,NM_001919	3,2-trans-enoyl-CoA isomerase, mitochondrial	0	13.42	14.8	11.17	20.31	16.49	19.69	11.73	15.2	5.98	15.04	12.51	21.34	39.52	17.23	46.16	14.41	21.92	10.79	8.39	14.18	35.12	22.85	15.29	33.01	29.95	18.96	71.22	50.88	10.37	18.35	31.01	21.61	10.25	27.4	13.63	9.04	28.51	13.38	20.58	14.97	6.94	8.1	22.83	21.61	9.19	21.67	12.82
NM_006579	3-beta-hydroxysteroid-Delta(8),	0	30.11	20.29	19.45	14.84	18.14	17.22	22.08	30.65	23.23	36.75	14.21	28.9	39.98	16.07	32.93	13.43	37.45	12.77	7.12	14.13	39.73	25.71	31.3	48.83	46.92	35.29	67.62	60.26	8.43	30.94	31.1	25.8	15.02	67.48	46.45	46.35	44.01	29.61	34.08	26.23	28.5	29.62	53.57	30.25	57.2	73.22	15.49
NM_001130996,NM_000859	3-hydroxy-3-methylglutaryl-Coenzyme A reductase	0	4.46	3.15	2.73	8.79	4.01	1.13	0.82	1.9	3.42	9.59	0.78	4.82	3.15	1.46	9.77	5.55	4.05	1.95	2.38	1.48	5.28	5.46	0.5	0.95	1.74	2.94	9.97	3.27	0.33	2.57	2.42	8.42	6.27	9.98	5.11	6.01	6.62	16.14	12.6	8.35	3.38	2.46	5.87	5.73	3.83	5.25	10.19
NM_014241	3-hydroxyacyl-CoA dehydratase 1	0	1.69	0.26	0.22	0	0.46	0.12	0.25	0.18	0.2	0.48	0.93	0.79	4.54	0.07	1.1	1.8	0.22	0.14	0.2	0.32	0.3	0.66	0.03	0.54	0.57	0.15	0.88	0	0	0.1	0.32	1.08	0.68	2.17	0.26	0.26	0.27	0.86	1.07	0.76	0.28	0.27	1.87	1.33	0.25	0.48	0.27
NM_198402	3-hydroxyacyl-CoA dehydratase 2	0	1.06	0.52	0.1	1.4	0	0.08	0	0.28	0.6	1.78	0	0.17	0	0.06	0.94	0.16	0.81	0.25	0.18	0.15	0.33	0.21	0.11	0.29	0.19	0.21	1.56	0.39	0.03	0.87	0.24	0	0.5	1.75	0.17	1.65	0.88	1.62	0.96	0.91	0.85	0.25	3.22	1.04	0.47	0.51	0.84
NM_016395	3-hydroxyacyl-CoA dehydratase 3	0	4.89	2.7	1.24	1.62	2.2	1.02	0.57	4.24	4	12.34	0.35	4.64	4.35	1.23	8.63	1.75	5.74	1.77	0.88	1.12	5.03	2.83	0.7	1.52	1.92	1.88	8.26	2.09	0.3	1.84	4.7	4.87	1.76	19.4	4.89	3.23	6.62	5.42	8.47	6.02	3.48	2.01	8.25	4.82	7.6	5.13	3.34
NM_001010915	3-hydroxyacyl-CoA dehydratase 4	0	7.97	10.29	14.8	10.15	22.77	8.35	5.09	12.36	5.25	10.02	3.89	22.12	21.38	11.68	73.74	37.71	18.69	7.37	9.28	20.38	19.6	26.16	1.87	4.29	11	6.65	82.79	39.32	3.86	7.81	12.24	63.64	18.6	46.97	15.29	21.31	26.1	188.14	100.45	70.88	24.46	9.48	12.52	32.42	17.5	17.39	41.49
NM_004493,NM_001037811	3-hydroxyacyl-CoA dehydrogenase type-2 isoform	0	43.6	43.38	55.81	68.23	51.67	47.65	40.41	41.34	19.22	48.34	36.9	55.22	92.37	41.34	110.28	39.53	53.29	27.87	19.97	38.9	76.74	42.94	50.85	90.26	99.71	67.57	147.33	113.37	38.06	57.01	96.48	65.09	105.35	187	52.36	24.15	90.68	64.71	83.84	65.14	56.48	42.67	96.94	73.08	97.84	150.92	41.01
NM_012205	3-hydroxyanthranilate 3,4-dioxygenase	0	5.13	2.65	4.72	7.24	2.51	1.86	6.31	2.11	1.31	1.56	4.29	2.09	3.61	2.78	8.61	5.2	3.01	2.16	2.41	4.93	2.1	2.03	2.05	2.97	6.55	4.55	6.42	7.31	8.77	4.11	7.13	7.74	10.25	2.78	3.04	2.53	7.9	10.3	8.52	12.12	4.49	3.72	5.47	4.85	1.31	6.55	5.27
NM_020139	3-hydroxybutyrate dehydrogenase type 2	0	0.43	0.21	0.07	0.08	0.55	0.09	0.14	0.35	0.52	0.94	0.13	1.08	0.93	0.17	0.87	0.12	0.92	0.12	0.28	0.23	0.44	0.44	0.16	0	0.42	0.3	2.22	0.85	0.01	0.28	0.59	0.24	0.11	0.76	1.19	0.8	0.52	1.24	0.72	0.79	0.37	0.31	1.68	0.58	0.5	0.91	0.41
NM_152740	3-hydroxyisobutyrate dehydrogenase,	0	1.88	1.39	0.88	2.49	1.01	0.9	0.12	1.97	0.49	2.56	0.38	2.42	4.26	0.88	4.64	0.54	3.37	2.3	0.78	0.89	2.13	1.61	0.37	0.17	1.65	0.73	1.71	2.2	0.16	1.77	2.64	0.24	0.61	10.63	1.62	1.37	4.32	4.41	4.16	1.7	1.89	0.88	6.8	3.75	2.51	4.43	2.21
NM_014362,NM_198047	3-hydroxyisobutyryl-CoA hydrolase, mitochondrial	0	0.65	2.51	0.98	0.97	1.77	1.28	0.29	1.74	0.14	0.91	0	3.21	1.67	1.16	4.25	2.52	2.46	0.71	0.52	0.66	3.94	1.09	0.51	0.62	1.31	1.71	8.13	2.33	0.08	0.2	1.5	1.84	1.08	12.11	0.49	0.44	4.08	2.98	5.97	2.77	0.77	0.35	3.07	1.81	7.01	2.87	3.24
NM_016371	3-keto-steroid reductase	0	0.41	0.27	0.45	0.22	0.8	0.15	0.13	0.42	0.06	0.33	0	0.71	0.46	0.09	0.3	0.58	0.6	0.33	0.21	0.31	0.63	0.53	0.16	0.57	0.54	0.2	2.33	1.55	0.15	0.09	0.46	0.31	0.57	0.88	0.09	0.28	0.54	0.19	1	0.42	0.3	0.25	1.71	0.65	1.52	1.36	1.23
NM_006111	3-ketoacyl-CoA thiolase, mitochondrial	0	6.48	5.45	4.83	4.74	4.89	3.75	1.86	5.65	1.96	12.1	1.69	7.69	10.27	4.91	15.64	5.88	13.69	6.11	4.01	3.87	9.07	7.85	2.32	3.23	6.92	7.47	10.42	8	1.22	7.08	11.69	6.36	6.34	23.2	7.69	3.99	9.05	9.86	15.8	12.39	8.2	6.92	29.88	8.12	13.66	10.95	5.05
NM_001130410,NM_001607	3-ketoacyl-CoA thiolase, peroxisomal isoform b	0	38.79	42.93	44.85	77.09	61.39	38.6	23.46	26.92	23.18	37.18	24.01	55.7	71.08	40.31	110.68	77.91	48.9	33.17	40.74	47.29	59.26	98.87	25.41	59.08	101.59	63.66	168.25	180.74	21.99	35.74	82.5	112.53	127.39	91.78	51.52	56.35	72.72	153.23	123.47	85.58	59.11	39.29	68.74	82.76	42.26	124.31	82.47
NM_002035	3-ketodihydrosphingosine reductase precursor	0	2.29	1.62	1.23	1.13	1.71	0.6	0.39	0.84	2.67	8.03	0.28	1.76	2.41	0.78	4.54	1.33	1.98	1.22	0.71	0.59	1.58	1.44	0.25	0.64	0.63	0.7	10.59	1.11	0.17	1.04	1.68	5.15	2.58	5.68	2.83	4.57	6.27	12.3	7.24	3.43	1.5	2.01	2.5	2.49	2.49	4.11	3.73
NM_021126,NM_001013436,NM_001130517	3-mercaptopyruvate sulfurtransferase isoform 1	0	24.21	9.39	13.3	22.92	27.13	15	16.43	17.93	18.06	23.17	59.29	24.14	65.71	13.18	40.56	43.93	18.15	11.83	11.36	18.9	28.17	23.58	19.74	43.3	36.49	22.82	48.75	44.69	20.5	15.83	22.29	29.82	20.93	16.95	11.98	11.63	14.62	16.39	18.93	14.98	5.01	7.3	19.97	32.93	6.3	22.21	13.17
NM_001047	3-oxo-5-alpha-steroid 4-dehydrogenase 1	0	0.55	0.69	1.09	2.2	1.16	0.64	0.45	0.97	0.62	0.87	0.33	0.94	1.2	0.82	3.84	1.45	1.59	0.88	0.88	1.38	1.95	1.87	0.47	2.61	2	1.43	4.45	2.2	0.53	1.51	2.42	0.63	2.26	5.51	1.6	1.82	3.61	1.97	3.57	3.4	2	1.62	3.17	2.43	2.37	3.63	1.95
NM_000348	3-oxo-5-alpha-steroid 4-dehydrogenase 2	1	0.12	0	0	0	0	0	0	0	0	0.05	0	0.02	0	0	0.14	0	0.01	0	0	0.02	0.02	0	0	0	0	0	0	0	0	0	0	0	0	0	0.02	0	0	0	0	0	0	0.02	0	0	0	0	0
NM_001190907,NM_005989,NM_001190906	3-oxo-5-beta-steroid 4-dehydrogenase isoform 3	1	0	0	0	0	0	0	0	0	0	0	0	0	0	0	0	0	0.02	0	0	0	0	0	0	0	0	0	0	0	0	0	0	0	0	0	0	0	0	0	0	0	0	0	0	0	0	0	0
NM_001145391,NM_017897	3-oxoacyl-[acyl-carrier-protein] synthase,	0	1.23	2.38	1.41	1.52	3.17	1.35	0.37	2.3	2.72	3.91	0.25	4.01	8.61	1.45	6.65	1.54	4.49	1.76	0.77	1.12	5.45	3.78	0.46	0.12	1.94	1.22	19.32	1.85	0.05	0.67	3.63	2.17	3.15	12.84	2.69	4.99	3.2	4.15	6.17	1.76	1	1.67	5.01	3.27	3.75	4.03	1.59
NM_031268,NM_002613	3-phosphoinositide-dependent protein kinase 1	0	2.29	0.86	0.38	2.43	0.95	0.11	0.1	0.2	0.52	2.35	0.22	0.37	0.19	0.23	0.89	0.51	1.18	0.72	0.36	0.51	0.46	0.6	0.13	0.54	0.73	0.9	1.63	1.46	0.13	1.21	0.32	0.29	1	1.31	0.92	1.31	1.71	4.76	2.33	1.58	0.96	1.1	2.58	1.39	0.58	1.05	2.17
NM_020236	39S ribosomal protein L1, mitochondrial	0	4.6	4.9	1.26	0.73	5.05	0.83	1.07	8.08	4.24	19.51	0.21	12.79	6.29	3.32	11.9	1.59	9.53	3.69	1.3	4.12	10.6	5.54	1.11	1.54	3.6	2.52	7.1	2.64	0.14	2.13	4.23	5.22	3.08	22.4	5.39	8.3	9.43	15.82	15.46	9.66	3.6	3.48	13.38	6.44	9.57	8.17	4.56
NM_145255	39S ribosomal protein L10, mitochondrial	0	28.74	10.36	7.78	13.89	12.94	7.59	5.48	13.56	40.93	75.37	9.9	16.01	29.06	5.89	25.01	9	20.51	9.89	5.33	7.14	10.02	10.2	9.08	14.23	15.12	15.41	40.88	33.98	2.69	29.41	17.81	10.32	12.51	44.69	28.91	28.83	27.07	34.31	26.24	16.19	14.13	13.32	52.57	25.17	29.1	40.74	11.12
NM_016050,NM_170738,NM_170739	39S ribosomal protein L11, mitochondrial isoform	0	9.3	8.65	10.49	6.5	14.83	8.01	8.82	18	8.41	30.88	11.96	20.7	30.08	10.57	37.93	8.35	17.58	8.07	5.07	9.7	19.51	12.35	9.01	13.19	21.17	12.01	40.71	20.13	7.34	13.77	22.06	17.12	10.11	47.66	14.01	7.05	12.73	14.39	15.96	16.65	10.47	8.01	16.06	12.88	17.6	22.18	6.81
NM_002949	39S ribosomal protein L12, mitochondrial	0	30.4	27.88	28.07	26.22	28.61	26.45	30.33	54.5	16.38	45.81	33.21	47.68	39.52	30.88	85.99	19.49	42.87	15.45	10.42	24.09	72.52	33.41	37.84	58.82	68.8	38.9	92.84	55.35	26.18	30.98	56.79	61.49	37.42	99.16	25.62	12.06	44.88	35.86	40.36	34.68	16.2	16.74	39.26	27.21	31.95	37.99	23.17
NM_014078	39S ribosomal protein L13, mitochondrial	0	5.08	7.47	3.92	2.69	11.26	3.87	1.63	18.4	7.83	18.06	1.69	18.32	18.42	6.37	32.59	10.1	13.93	5.89	3.32	2.71	27.1	19.62	2.6	3.6	7.84	4.22	23.13	5.08	0.98	5.33	14.32	15.78	12.4	76.57	11.33	7.56	18.29	23.87	28.13	17.25	8.73	5.39	19.7	11.48	21.67	10.55	7.64
NM_032111	39S ribosomal protein L14, mitochondrial	0	26.36	17.97	13.19	15.31	36.49	13.8	8.96	20.44	27.83	73.59	11.95	33.67	75.06	18.71	68.68	24.97	30.7	17.07	10.92	17.53	51.06	31.85	14.78	35.02	30.97	30.21	90.04	49.97	8.78	18.63	41.89	41	46.06	144.23	27.66	28.76	47.35	69.56	52.71	40.46	20.71	14.81	39.52	30.99	35.81	51.52	25.82
NM_014175	39S ribosomal protein L15, mitochondrial	0	4.31	8.35	4.49	5.63	8.99	4.37	5.16	14.97	5.72	16.09	4.37	17.5	10.92	6.3	34.64	6.6	13.44	6.6	3.52	4.39	19.02	11.35	2.94	5.55	8.2	5.87	23.57	7.15	1.95	6.65	13.04	13.51	12.33	60.43	8.11	6.36	14.53	11.51	18.48	15.03	8.21	5.93	13.99	10.55	15.87	16.54	6.04
NM_017840	39S ribosomal protein L16, mitochondrial	0	17.22	17.81	18.9	22.74	22.33	17.39	2.59	14.97	9.66	30.23	4.02	19.41	33.41	10.46	48.8	13.73	23.26	12.94	9.95	12.66	26.6	22.61	9.03	15.56	18.42	21.67	76.63	47.9	3.35	13.7	28.92	44.02	18.24	46.85	15.08	9.62	31.17	42.01	46.39	32.2	17.69	15.87	38.65	23.65	31	46.01	19.48
NM_022061	39S ribosomal protein L17, mitochondrial	0	3.04	4.71	3.62	5.89	7.23	3.53	0.97	6.49	2.32	7.52	0.67	8.09	8.61	3.07	13.48	3.05	7.28	2.07	1.44	2.62	10.19	6.37	2.75	3.01	5.84	2.79	21.33	12.1	1.36	2.96	6.27	11.29	2.8	19.08	2.44	2.96	6.16	4.09	8.51	3.7	3.02	2.22	6.59	5.27	6.88	7.04	3.13
NM_014161	39S ribosomal protein L18, mitochondrial	0	22.48	15	38.54	22.78	37.98	13.67	3.22	18.69	16.33	36.09	2.39	19.87	16.85	13.3	43.99	26.98	24.76	11.22	7.55	15.6	27.33	21.42	6.95	20.09	20.81	17.68	200.43	65.54	2.86	10.27	18.33	38.78	25.77	77.88	12.06	21.2	43.6	55.67	74.23	36.81	12.11	9.56	31.47	25.3	61.1	37.64	50.33
NM_014763	39S ribosomal protein L19, mitochondrial	0	1.28	0.91	0.73	1.09	1.33	0.62	0.09	1.15	0.63	3.74	0.09	1.2	1.39	0.49	3.68	0.77	1.55	0.78	0.36	0.58	1.61	1.11	0.26	0.36	0.48	0.61	4.04	1.07	0.06	0.83	1.73	1.07	1.18	5.42	1.07	1.08	2.59	2.73	4.38	2.85	0.93	0.58	2.78	1.52	2.19	2.27	1.23
NM_015950	39S ribosomal protein L2, mitochondrial	0	13.15	9.45	10.52	19.18	8.93	11.6	4.73	7.03	8.2	19.35	5.95	11.36	17.4	6.15	20.56	7.44	13.34	4.92	3.74	7.35	13.46	7.82	8.87	14.04	17.63	14.64	41.33	37.95	8.32	7.25	16.82	13.97	15.13	20.54	12.39	8.91	19.76	13.51	15.15	8.69	6.17	7.29	17.95	9.9	17.19	25.39	6.7
NM_017971	39S ribosomal protein L20, mitochondrial	0	37.24	37.77	34.63	45.32	37.15	38.21	13.32	32.81	18.99	73.13	17.58	63.38	112.55	35.42	121.91	30.31	59.38	27.71	23.07	28.97	72.35	49.02	19.2	43.61	65.25	50.53	173.49	91.45	17.27	41.54	100.22	81.11	90.36	187.18	36.92	17.29	81.54	73.84	96.72	71.54	37.87	32.74	80.99	74.31	63.24	131.26	50.35
NM_181514,NM_181515	39S ribosomal protein L21, mitochondrial isoform	0	23.01	13.05	15.78	11.71	21.06	15.29	15.53	26.14	15.5	52.74	14.76	43.58	72.56	20.3	77.21	27.52	26.3	15.41	10.64	13.73	38.17	33.93	14.34	22.3	28.9	16.06	75.09	39.98	9.2	16.44	44.95	41.1	45.24	113.22	34.28	20.53	46.77	28.82	31.62	35.08	17.54	14.04	40.79	33.13	31.28	55.09	19.33
NM_001014990,NM_014180	39S ribosomal protein L22, mitochondrial isoform	0	7.42	4.83	2.28	1.05	6.73	2.51	3.27	8.63	8.32	18.6	3.12	14.17	17.86	4.7	13.68	4.2	7.42	3.33	1.91	3.05	14.56	7.73	3.02	4.22	6.08	3.87	11.3	8.03	0.95	3.97	8.04	12.52	6.6	44.09	14.86	8.42	7.82	12.68	10.23	9.44	4.44	3.96	7.08	4.89	7.96	6.27	2.63
NM_021134	39S ribosomal protein L23, mitochondrial	0	77.5	29.42	41.01	34.52	51.46	40.8	118.79	54.78	45.23	67.78	98.44	66.31	130.87	54.99	145.16	38.52	49.02	34.07	28.45	46.89	90.91	61.8	53.12	97.32	88.62	55.02	109.38	105.89	62.94	55.77	82.92	89.18	86.53	144.44	59.42	32.59	72.94	61.86	74.26	63.77	32.56	35.7	63.39	64.41	54.63	83.77	31.31
NM_145729,NM_024540	39S ribosomal protein L24, mitochondrial	0	17.25	30.26	23.14	19.69	29.34	21.94	10	31.53	6.69	19.61	13.99	49.43	42.67	19.82	78.7	17.91	34.09	14.33	9.28	20.84	58.34	25.21	22.9	38.37	54.15	33.98	120.03	44.36	13.14	21.49	53.18	42.09	47.78	152.93	20.74	10.88	57.59	46.7	45.99	37.99	24.66	12.39	41.69	33.39	43.37	60.91	21.99
NM_016504	39S ribosomal protein L27, mitochondrial	0	29.01	21.72	22.28	14.49	40.47	21.85	21.58	27.15	8.32	45.57	17.94	35.61	39.43	25.93	81.35	22.36	33.18	14.45	10.2	16.95	63.02	38.01	23.76	39.31	50.01	32.33	115.91	82.2	24.36	16.48	57.69	59.3	50.72	108.69	31.22	13.4	48.83	37.73	58.23	33.86	23.18	14.77	45.7	34.49	65	64.91	20.91
NM_006428	39S ribosomal protein L28, mitochondrial	0	51.6	43.76	55.78	64.61	43.81	43.6	61.55	25.39	26.02	50.85	56.1	61.87	71.92	35.13	83.63	52.05	53.01	25.04	39.14	48.62	58.21	52.26	46.91	98.84	88.93	58.84	167.29	188.14	52.76	48.9	67.38	120.95	90.94	49.04	61.36	35.88	79.56	141.28	99.33	103.43	32.6	54.19	66.74	74.93	44.86	83.32	62.28
NM_007208	39S ribosomal protein L3, mitochondrial	0	3.61	5.63	3.07	2.3	8.03	2.1	1.35	14.12	7.67	20.99	1.18	10.25	10.27	4.04	22.15	3.96	10.01	6.25	2.1	2.67	11.62	5.4	2.03	2.11	4.57	3.55	10.4	2.99	0.76	4.64	6.69	10.37	5.88	46.11	8.23	5.93	12.25	11.32	15.98	16.98	6.52	4.3	12.7	8.06	10.68	6.16	6.74
NM_145212	39S ribosomal protein L30, mitochondrial	0	2.55	1.92	1.2	2.5	3.38	1.08	0.92	2.93	2.04	8.59	0.58	4.33	7.22	1.88	9.04	2.89	4.33	1.99	1	1.17	4.07	4.21	0.67	1.35	1.39	1.63	7.55	2.38	0.86	1.35	3.81	8.57	3.98	12.08	3.27	1.93	4.44	3.87	8.04	4.2	1.96	1.58	6.24	3.49	4.12	5.59	2.49
NM_031903	39S ribosomal protein L32, mitochondrial	0	12.67	7.94	3.33	6.59	12.9	2.64	2.35	10.57	14.03	22.24	1.36	10.4	10.37	7.56	22.31	5.67	14.52	5.43	2.64	6.15	20.13	13.94	5.49	9.94	9.11	10.46	66.72	17.58	1.35	4.19	13.32	15.68	8.42	36.37	8.01	11.92	16.11	23.87	23.04	15.97	5.21	4.25	16.65	8.96	9.81	8.09	7.04
NM_145330,NM_004891	39S ribosomal protein L33, mitochondrial isoform	0	24.81	23.86	21.09	16.23	43.18	15.49	8.32	30.84	25.98	81.46	14.4	42.99	43.22	19.19	101.63	36.56	32.7	17.05	13.1	24.57	47.39	42.78	7.16	15.07	30.07	20.21	119.86	51.93	5.09	10.67	34.8	45.66	52.58	118.08	39.58	38.96	47.71	148	85.94	92.99	30.54	16.61	33.33	39.99	32.85	43.6	36.74
NM_023937	39S ribosomal protein L34, mitochondrial	0	13.92	13.75	11.83	20.22	22.89	9.22	2.58	27.92	18.57	25.58	3.37	18.38	45.63	13.55	45.63	11.94	28.3	15.29	8.56	11.11	26.3	16.09	11.81	22.59	24.54	19.91	70.3	40.55	4.21	10.29	25.21	24.68	15.16	44.78	9.52	16.78	27.33	17.09	28.33	22.71	9.28	5.95	24.14	26.3	17.08	25.87	12.15
NM_016622,NM_145644	39S ribosomal protein L35, mitochondrial isoform	0	0.75	1.75	1.27	1.8	2.73	0.72	0.41	2.81	0.64	5.79	0.17	4.42	2.22	1.48	6.56	1.31	4.33	1.55	0.89	0.78	5.61	3.38	0.84	0.95	2.31	1.51	10.01	3.36	0.36	1.56	2.51	4.28	2.19	13.14	1.5	1.22	4.72	3.23	6.64	2.79	1.31	1.13	5.64	2.56	5.44	4.28	1.55
NM_032479	39S ribosomal protein L36, mitochondrial	0	3.59	5.1	5.96	3.61	5.26	3	2.17	6.4	3.61	6.69	6.24	9.9	18.23	6.71	19.66	8.23	8.43	2.98	1.57	4.23	15.35	10.16	4.14	9.33	6.03	6.98	29.37	17.34	1.39	1.78	7.47	6.18	6.85	17.44	4.06	9.49	8.94	5.39	9.43	6.56	5.43	4.35	12.21	11	10.12	9.7	4.65
NM_016491	39S ribosomal protein L37, mitochondrial	0	53.96	19.38	22.17	20.91	20.54	23.02	18.77	27.32	18.65	54.71	23.05	20.45	39.15	13.39	47.82	16.44	30.23	13.7	8.48	16.61	28.35	15.03	15.89	32.34	34.65	29.59	44.5	33.59	12.47	31.56	35.3	23.48	31.72	75.48	27.24	12.19	45.89	23.27	44.49	26.55	17.98	18.79	59.11	38.24	50.1	57.25	16.08
NM_032478	39S ribosomal protein L38, mitochondrial	0	20.5	16.91	17.25	21.07	14.2	16.75	10.92	14.87	15.85	40.31	10.06	16.79	40.17	14.96	40.43	13.85	24.79	11.25	8.55	16.79	27.67	15.79	18.55	37.46	39.93	30.35	83.07	45.28	12.36	20.69	28.35	22.08	19	29.03	20.07	14.82	30.72	13.47	24.51	16.79	11.21	12.98	27.07	25.65	20.12	46.01	13.76
NM_017446,NM_080794	39S ribosomal protein L39, mitochondrial isoform	0	5.37	4.91	1.18	1.98	2.76	2.7	0.83	4.69	2.34	14.91	1.35	6.07	7.87	2.59	14.69	1.7	6.55	1.95	1.23	1.16	9.42	5.12	1.67	0.74	2.01	2.07	13.69	2.68	0.17	2.09	4.68	9.91	3.84	21.58	3.1	3.87	9.08	6.37	8.18	4.2	1.41	2.76	6.67	3.2	7.79	4.23	2.68
NM_146388,NM_146387,NM_015956	39S ribosomal protein L4, mitochondrial isoform	0	11.73	8.58	9.72	15.01	6.55	7.96	3.56	9.59	6.04	19.48	4.66	8.97	13.98	6.08	20.53	5.41	15.89	6.61	4.27	9.17	10.87	6.51	9.56	16.04	17.16	14.23	38.06	18.76	5.23	14.53	14.23	10.44	7.6	9.45	6.47	4.03	13.74	7.36	10.99	8.33	4.81	7.18	19.15	12.88	8.18	18.13	7.96
NM_003776	39S ribosomal protein L40, mitochondrial	0	15.01	19.58	10.58	5.59	20.62	17.7	10.9	46.41	6.89	32.25	9.66	63.76	71.73	22.36	95.21	18.94	34.93	18.38	9.83	20.83	61.63	31.5	12.47	19.55	23.03	9.52	50.49	38.69	6.68	12.07	33.32	40.75	29.86	103.07	17.33	11.63	29.3	18.93	38.77	41.43	17.44	13.65	39.19	34.58	28.49	37.5	12.47
NM_032477	39S ribosomal protein L41, mitochondrial	0	59.24	43.14	42.38	54.84	51.45	41.36	65.87	64.41	34.51	66.67	102.09	91.86	166.14	76.33	135.22	51.16	64.91	34.24	28.09	47.23	111.06	60.83	62.98	140.72	117.24	79.61	229.44	149.66	60.97	51.06	100.27	81.58	30.75	59.33	37.24	29.07	55.68	38.43	49.43	37.65	17.12	18.19	52.19	79.88	28.1	72.17	27.67
NM_172178,NM_014050,NM_172177	39S ribosomal protein L42, mitochondrial isoform	0	4.46	1.4	1.11	1.95	2.76	0.44	0.53	4.06	2.43	8.3	0.28	4.08	1.94	1.28	6.94	1.49	4.69	2.28	1.15	1.66	4.12	3	0.41	0.09	2.2	0.96	6.03	2.53	0.19	2.02	2.28	3.36	3.66	22.62	4.02	3.14	9.03	11.48	11.76	9.29	3.67	2.3	7.33	4.04	6.53	3.63	5.63
NM_176792,NM_176794,NM_176793,NM_032112	39S ribosomal protein L43, mitochondrial isoform	0	13.11	11.4	10.39	14.09	12.08	7.83	5.09	10.06	7.37	18.11	6.68	15.11	35.26	11.87	41.32	15.69	19.44	9.33	7.23	11.83	25.06	17.24	8.48	19.84	23.59	14.92	49.82	34.9	5.66	9.89	22.85	17.16	13.37	29.26	10.94	7.28	21.3	20.26	24.56	18.86	9.11	6.94	20.89	26.79	11.17	25.96	13.76
NM_022915	39S ribosomal protein L44, mitochondrial	0	8.79	7.43	11.77	14.76	13.61	7.38	2.65	4.28	9.28	21.75	0.8	8.27	9.44	3.38	16.29	8.88	12.75	4.38	4.78	4.89	8.27	8.72	2.52	4.27	5.41	9.13	68.11	45.69	1.51	6	8.42	21	8.57	24.24	8.47	19.05	17.42	33.16	37.23	9.83	5.72	5.94	11.9	12.13	11.94	15.18	11.06
NM_032351	39S ribosomal protein L45, mitochondrial	0	3.52	4.71	4.58	3.26	5.12	3.35	2.64	6.18	8.62	18.73	2.2	7.5	11.29	4.4	15.46	3.73	9.48	4.74	2.49	3.06	8.34	5.87	1.52	4.41	5.75	3.74	16.47	4.8	1.69	3.52	8.83	6.14	7.96	32.92	10.87	8.93	13.62	6.85	15.06	7.28	5.21	2.79	7.4	5.89	11.48	12.71	3.66
NM_022163	39S ribosomal protein L46, mitochondrial	0	3.13	8.22	5.44	4.2	7.46	6.35	1.25	10.98	5.13	21.4	0.75	14.97	20.45	8.43	32.47	7.93	18.06	5.58	4.06	3.74	21.47	12.11	5.31	11.46	8.7	8.45	32.32	15.49	1.4	5.66	14.01	14.43	12.58	36.97	4.98	3.25	12.71	7.99	18.48	8.3	4.82	3.48	15.12	9.74	14.98	16.62	6.06
NM_177988,NM_020409	39S ribosomal protein L47, mitochondrial isoform	0	20.21	10.12	3.69	3.1	11.64	3.78	9.98	25.99	23.15	70.26	6.97	30.35	34.15	10.78	45.93	15.62	18.79	10.47	5.08	8.28	32	25.17	5.37	6.62	13.06	6.37	21.05	8.77	1.68	7.2	13.24	33.72	18.78	77.38	40.18	25.7	22.57	47.3	37.25	40.66	16.32	11.94	21.92	20.77	17	23.01	10.65
NM_016055	39S ribosomal protein L48, mitochondrial	0	9.27	4.68	3.45	3.16	7.21	3.78	3	15.48	8.96	12.72	4.57	14.81	36.37	7	25.17	5.9	12.5	6.11	2.35	4.75	15.02	10.73	4.1	10.99	10.99	2.68	21.56	6.72	1.7	4.79	10.98	14.25	9.18	50.34	9.54	4.63	14.53	8.47	14.77	13.33	5.46	3.56	14.68	10.19	11.88	12.99	7.64
NM_004927	39S ribosomal protein L49, mitochondrial	0	12.45	10.4	9	22.29	9.94	6.02	1.1	8.76	10.89	39.69	2.15	7.76	14.16	3.34	18	7	16.98	6.61	5.14	6.67	10.75	9.14	3.64	9.8	16.52	10.74	40.11	26.59	0.96	10.77	13.27	6.91	7.46	23.39	9.53	7.65	14.9	19.53	15.29	10.96	8.38	6.1	17.49	13.26	11.86	21.62	11.57
NM_019051	39S ribosomal protein L50, mitochondrial	0	2.14	2.13	0.91	0.65	2.57	0.91	0.71	4.51	3.46	11.34	0.45	3.43	3.24	1.45	7.76	1.77	6.35	2.48	0.57	0.78	6.45	3.3	0.63	1.19	1.79	1.77	5.01	3.99	0.38	2.46	4.14	6.03	3.8	20.07	4.02	4.52	4.56	4.6	10.59	3.94	2.31	1.77	5.98	3.66	6.08	4.62	2.86
NM_016497	39S ribosomal protein L51, mitochondrial	0	35.17	59.7	33.66	40.19	98.8	37.18	36.12	128.21	18.7	70.06	23.84	138.65	118.75	72.14	202.99	73.01	96.45	40.47	25.97	42.11	172.39	108.66	44.06	77.14	108.95	54.48	224.67	114.11	16.21	29.05	92.08	220.45	93.27	285.51	33.17	24.38	77.67	85.95	128.36	101.12	33.43	23.33	83.27	63.41	96.59	107.03	34.01
NM_181307,NM_181305,NM_181306,NM_178336,NM_181304,NM_180982	39S ribosomal protein L52, mitochondrial isoform	0	14.04	17.08	17.64	11.62	22.89	20.05	25.96	24.21	13.89	19.72	26.96	40.39	35.63	25.58	71.55	19.1	21.63	11.07	8.26	19.78	47.96	25.55	16.97	21.19	35.21	18.24	56.63	32.52	20.59	10.04	39.98	41.13	31.22	78.24	20.58	16.58	28.74	24.92	35.85	28.24	15.98	9.74	22.2	26.04	27.88	39.97	11.24
NM_053050	39S ribosomal protein L53, mitochondrial	0	62.68	42.13	38.71	38.31	71.75	38.36	60.53	58.45	31.67	86.83	94.49	95.59	232.5	61.58	156.35	95.05	68.81	32.07	44.32	50	108.39	80.48	39.21	73.36	98.38	54.01	166.86	107.83	46.48	29.79	104.18	121.14	82.23	136.62	45.7	39.77	63.51	93.72	92.02	54.63	32.05	31.27	111.55	111.16	48.33	95.12	49.96
NM_172251	39S ribosomal protein L54, mitochondrial	0	102.77	38.71	35.14	47.48	58.95	30.98	96.44	63.98	89.83	266.56	94.03	88.23	199.18	52.28	166.77	59.18	75.89	33.81	31.79	42.19	93.09	64.22	50.76	111.02	149.45	66.42	210.33	184.3	41.03	46.5	113.71	81.75	81.8	175.67	164.19	102.43	113.39	160.49	81.48	107.9	43.78	45.38	80.58	108.31	47.49	116.51	47.56
NM_181441,NM_181462,NM_181455,NM_181456,NM_181464,NM_181463,NM_181454,NM_181465	39S ribosomal protein L55, mitochondrial isoform	0	20.67	16.31	14.86	17.03	15.85	20.14	23.59	18.94	14.14	30.4	27.64	27.98	60.25	17.44	33.44	15.67	22.34	12.63	8.78	49.57	37.65	19.95	22.4	45.39	45.43	20.68	48.07	42.36	14.27	23.21	32.5	24.64	11.08	24.4	16.5	21.48	20.11	17.25	14.55	16.55	8.48	12.55	30.42	39.27	11.87	37.53	14.03
NM_031420	39S ribosomal protein L9, mitochondrial	0	23.08	18.9	17.48	19.81	22.96	15.69	12.37	26.4	19.36	75.94	10.05	29.66	56.74	15.84	49.03	13.57	31.23	13.52	7.5	18.51	31.23	18.04	12.57	30.94	31.7	21.14	74.38	43.77	6.28	18.54	38.11	22.01	26.45	87.7	41.38	17.83	50.6	37	53.32	41.43	21.86	16.51	39.33	31.54	41.68	47.43	15.53
NM_020686,NM_000663,NM_001127448	4-aminobutyrate aminotransferase, mitochondrial	0	0.63	0.44	1.18	4.08	1.44	0.28	0.08	0.52	0.27	1.1	0.27	0.47	0.74	0.31	1.35	0.82	1.18	1.04	0.51	0.61	0.4	1	0.18	0.35	0.57	0.67	0.43	1.5	0.08	0.94	0.81	1.43	1.54	1.14	0.55	0.34	0.94	1.24	2.77	1.3	0.81	0.36	3.17	1.62	0.94	1.99	6.38
NM_001171993,NM_002150	4-hydroxyphenylpyruvate dioxygenase isoform 2	0	0.17	0.36	0.58	0.64	0.21	0.17	0.49	0.5	0.29	0.46	0.39	0.3	2.13	0.59	0.71	0.47	0.28	0.19	0.14	0.54	0.94	0.29	0.18	0.83	2.3	0.34	3.29	4.45	0.47	0.78	1.57	0.13	1.43	0.31	0.28	1.89	0.86	0.89	0.92	0.52	0.22	0.16	0.25	0.39	0.14	0.65	0.94
NM_032756	4-hydroxyphenylpyruvate dioxygenase-like	0	0.17	0.9	0.45	0.12	0.22	0.5	0.14	1.3	0.35	1.11	0.1	1.4	0	0.47	1.92	0.21	2.26	0.33	0.24	0.33	1.79	0.64	1.05	0.67	1.16	1.01	0.15	0.52	0.02	0.97	1.43	1.31	0	4.12	0.41	0.29	1.16	1.08	0.9	0.49	0.21	0.41	2.71	0.13	1.28	0.34	0.56
NM_000696	4-trimethylaminobutyraldehyde dehydrogenase	0	9.03	5.92	5.04	12.25	6.53	3.53	1.61	3.79	5.49	23.01	1.27	6.58	7.68	3.34	17.18	6.41	12.89	5.38	4.06	2.86	5.31	6.47	0.55	2.21	3.89	5.28	14.01	9.75	0.7	6.09	8.43	4.82	7.89	15.85	6.67	7.87	15.16	12.24	18.15	12.23	6.18	5.15	19.8	11.97	10.57	21.28	12.08
NM_001014	40S ribosomal protein S10	0	36.11	19.35	7.98	10.23	41.54	13.18	2.35	2.57	21.85	32.53	4.24	3.18	26.75	1.53	13.57	6.16	2.02	1.76	2.95	3.11	16.12	19.74	20.88	49.57	41.65	6.53	76.39	22.6	9.19	18.47	18.24	16.51	56.35	127.01	56.65	58.45	0.76	50.6	25.1	21.47	21.98	16.41	29.27	32	26.48	55.66	22.33
NM_001015	40S ribosomal protein S11	0	1812.87	559.44	697.69	706.67	1688.45	654.91	1290.02	708.78	2894.39	3122.13	2188.25	1404.22	6173.87	674.78	2385.99	1919.77	1075.31	647.56	523.41	978.14	1485.03	1097.31	635.64	2561.43	1868.7	935.13	4204.21	1837.22	916.83	705.6	1363.67	2084.31	4138.42	4533.53	2767.6	3019.37	2497.93	2603.5	1696.57	1395.34	918.98	803.78	1976.23	2550.17	1178.98	3870.09	1137.82
NM_001016	40S ribosomal protein S12	0	820.29	112.5	102.45	285.54	457.5	35.05	135.78	96.93	614.54	1021.85	398.19	319.76	2166.18	127.31	361.51	568.94	231.42	225.64	89.63	144.4	172.88	184.98	51.28	633.23	179.97	155.18	907.24	709.71	99.81	118.32	122.93	277.5	429.2	378.22	216.16	326.74	394.79	371.4	188.63	172.86	174.21	130.02	394.76	645.19	170.52	636.7	197.54
NM_001017	40S ribosomal protein S13	0	147.8	52.49	38.93	30.37	100.36	47.06	74.39	96.23	329.53	430.72	112	199.59	592.91	58.56	277.37	134.3	148.49	64.73	43.02	92.6	108.67	75.28	31.85	70.66	121.66	51.56	337.98	78.8	21.45	72.8	100.86	105.27	171.16	573.85	301.91	412.52	227.86	186.46	123.85	133.54	79.2	55.73	148.74	147.91	90.56	201.02	86.28
NM_005617,NM_001025071,NM_001025070	40S ribosomal protein S14	0	287.4	111.94	93.64	73.36	259.8	87.38	188.01	232.08	764.27	714.78	427.6	406.28	1584.56	164.01	474.21	311.59	247.51	181.27	114.71	153.32	297.35	187.79	113.89	363.63	331.93	155.46	624.3	194.7	98.49	100.85	176.27	308.3	304.21	595.52	418.83	496.63	341.12	321.53	213.34	244.38	97.9	102.57	296.81	389.25	123.69	434.92	176.04
NM_001018	40S ribosomal protein S15	0	5.9	0.77	1.46	0.83	1.89	1.7	2.12	1.4	8.17	2.34	2.11	1.45	5	1.38	2.1	0.68	1.23	1.23	0.3	1.44	2.45	1.42	2.59	2.28	5.62	2.27	5.07	3.84	1.24	0.97	1.96	1.34	0	3.63	3.8	4.67	3.07	1.05	2.14	1.34	1.41	3.89	2.3	4.69	3.71	2.33	1.35
NM_001019,NM_001030009	40S ribosomal protein S15a	0	212.96	92.63	55.14	41.14	204.43	24.63	91.03	177.65	404.74	466.49	230.18	267.67	774.33	113.03	284.5	206.68	208.1	128.51	57.28	95.14	185.55	107.9	73.81	356.94	262.67	151.99	877.89	249.73	49.28	84.52	142.25	189.9	127.32	398.88	149.2	212.45	94.26	180.31	108.16	109.11	75.08	38.91	156.45	191.16	74.79	111.52	63.68
NM_001020	40S ribosomal protein S16	0	701.91	307.33	266.68	220.65	527.3	282.13	336.32	357.83	1472.3	1402.89	536.82	466.04	1817.99	308.94	892.14	329.24	542.95	324.26	191.94	395.73	605.28	400.53	353.79	737.73	815.41	378.87	2091.49	637.82	166.54	445.59	582.07	502.38	682.98	1374.95	1138.39	1369	1024.62	826.44	602.69	536.34	267.56	310.69	678.72	780.84	404.78	1034.12	519.52
NM_022551	40S ribosomal protein S18	1	0	0	0	0	0	0	0	0	0	0	0	0	0	0	0	0	0	0	0	0	0	0	0	0	0	0	0	0	0	0	0	0	0	0	0	0	0	0	0	0	0	0	0	0	0	0	0
NM_001022	40S ribosomal protein S19	0	292.65	160.1	156.74	210.5	386.99	164.01	318.09	210.46	873.33	758.76	371.12	399.5	915.01	272.94	569.57	301.84	296.34	205.82	124.04	272.04	465.77	258.07	193.26	441.28	520.57	224.34	1069.03	559.48	186.26	200.13	390.98	325.58	200.69	470.78	453.41	565.31	399.84	358.49	272.74	232.22	122.55	128.01	269.5	330.54	150.85	460.51	172.88
NM_002952	40S ribosomal protein S2	0	27.61	15.21	11.43	11.39	23.31	8.52	5.95	6.14	37.41	37.13	8.32	10.54	36.37	7.2	27.72	11.68	8.49	6.57	9.53	5.41	21.73	15.47	10.28	40.52	39.65	28.64	73.59	21.42	4.57	26.14	41	18.33	1.58	5.05	3.07	9.99	6.19	7.61	6.01	5.59	2.5	2.24	3.89	8.48	1.89	4.57	5.22
NM_001146227,NM_001023	40S ribosomal protein S20 isoform 1	0	183.45	69.03	46.52	30.46	170.43	34.93	66.97	101.95	322.1	334.72	77.16	119.37	468.43	58.03	189.28	91.01	113.09	59.08	31.65	76.73	119.97	104.81	81.19	204.35	196.98	94.19	554.26	159.8	33.65	75.83	116.77	146.16	210.05	553.8	512.71	741.8	467	495.24	242.21	267.3	80.46	91.96	239.21	231.8	86.89	251.29	162.5
NM_001024	40S ribosomal protein S21	0	430.79	260.34	170.01	68.88	501.36	145.54	320.33	336.31	1374.81	1276.59	370.51	786.33	2364.26	269.18	992.03	304.2	435.93	252.96	131.77	296.93	704.92	432.01	262.51	564.03	764.43	296.32	1572.12	384.45	136.67	236.45	508.9	796.35	250.77	1168.45	622.63	820.75	453.62	472.7	245.14	280.76	152.46	134.52	467.27	481.36	211.36	459.43	273.61
NM_001025	40S ribosomal protein S23	0	83.74	43.5	17.39	26.69	99.28	15.41	24.02	59.28	208.67	315.18	33.99	78.76	305.25	29.17	138.68	49.41	75.98	45.89	21.39	53.59	71.51	51.99	35.15	97.77	104.77	61.59	370.67	59.74	9.06	57.08	81	83.7	33.87	202.87	93.46	129.54	71.27	95.59	50.23	52.94	42.3	31.92	99.33	69.52	57.29	122.92	59.8
NM_001142284,NM_001142283,NM_033022,NM_001142282,NM_001026,NM_001142285	40S ribosomal protein S24 isoform b	0	152.69	46.66	10.83	4.79	122.56	6.29	67.41	97.23	210.04	316.18	80.05	168.19	455.56	55.46	162.98	97.33	87.77	59	27.1	76.42	169.59	110.56	33.27	128.14	128.29	52.27	330.69	65.47	15.37	30.81	53.37	178.94	27.03	111.89	72.58	119.89	32.85	60.65	34.28	61.52	36.69	15.75	92.14	68.71	25.41	18.47	24.22
NM_001028	40S ribosomal protein S25	0	254.78	104.92	58.46	44.73	219.48	52.79	123.31	303.86	425.45	728.9	335.19	373.83	1322.17	229.44	384.96	243.87	346.95	303.23	114.37	185.53	206.28	151.97	95.39	272.26	348.27	186.25	911.56	246.68	30.35	111.97	173.63	185.55	151.44	415.18	230.12	312.35	209.23	201.24	146.21	150.94	103.02	88.59	234.77	249.53	117.51	313.78	112
NM_001029	40S ribosomal protein S26	0	2.77	0.75	1.55	0.32	0.59	1.33	0.35	1.06	1.17	2.02	0.28	0.61	0	0.97	3.11	1.59	3.8	0.76	0.32	1.73	1.34	1.55	0.48	2.04	2.25	1.04	5.63	0	0.06	1.04	1.94	3.82	0.9	3.28	1.68	1.38	3.77	3.23	2.41	4.61	1.82	1.01	3.14	2.56	4.7	5.45	1.25
NM_001030	40S ribosomal protein S27	0	9.8	2.8	2.31	8.49	5.14	1.83	10.41	2.16	58.61	50.93	24.38	8.47	41.19	2.88	14.27	6.16	5.93	4.3	2.12	17.4	3.45	4	1.65	29.09	21.22	3.15	27.79	15.11	3.53	7.67	6.7	4.03	11.04	17.29	25.02	62.2	19.21	21.94	14.64	18.79	12.86	5.75	6.95	14.17	3.91	23.91	7.7
NM_015920	40S ribosomal protein S27-like	0	10.12	7.31	3.41	3.67	13.95	3.63	2.49	16.73	4.99	14.14	3.62	18.71	13.42	9.63	37.7	11.33	13.8	7.22	4.2	6.26	27.11	18.14	5.71	12.5	13.24	8.03	21.07	33.37	1.54	4.69	15.43	25.12	17.96	177.51	20.05	11.45	26.8	34.88	37.27	34.74	16.2	5.96	17.21	23.75	22.19	12.14	8.16
NM_001031	40S ribosomal protein S28	0	0.82	0.63	1.39	1.16	0	1.1	1.91	1.13	4.66	6.22	7.36	1.35	5.18	1.14	3.82	1.89	1.8	0.71	0.42	0.93	0.57	0.92	0.5	0.92	7.08	1.72	10.44	6.59	0.82	0.68	2.37	1.25	2.37	0.39	4.43	4.28	1.54	0.73	2.64	0.7	1.38	2.6	2	3.27	0.59	4.31	1.31
NM_001030001,NM_001032	40S ribosomal protein S29 isoform 2	0	167.04	68.64	43.94	17.74	143.66	45.68	91.67	70.09	344.6	459.21	103.91	262.59	349.49	53.66	222.61	85.25	135.54	62.12	29.76	83.64	141.46	139.22	28.55	125.2	141.2	50.46	486.45	151.56	51.66	45.93	131.46	265.46	167.5	820.98	434.42	556.64	271.86	364.23	166.26	193.44	129.1	59.67	198.55	218.63	146.58	267.37	108.09
NM_001005	40S ribosomal protein S3	0	240.83	106.95	104.08	91.6	207.23	104.9	77.25	75.45	434.59	559.54	120.33	145.15	489.16	64.92	287.24	122.94	165.72	64.27	52.55	145.3	184.46	125.81	114.98	293.61	274.18	194.68	965	250.84	58.82	173.89	248.81	164.25	268.55	670.69	304.8	359.62	377.84	383.42	236.65	171.37	151.63	133.54	300.3	268.87	227.58	538.21	171.34
NM_001006	40S ribosomal protein S3a	0	0.7	0.45	0.18	0	0.67	0.14	0.49	0.93	1.57	1.92	0.31	1.6	0	0.15	1.6	0.4	0.73	0.62	0.42	0.59	0.24	0.5	0	0	0.24	0.33	0	0.7	0.13	0.78	0.31	0.26	0.65	1.48	1.27	0.95	1.16	0.6	0.69	0.3	0.66	0.86	1.18	0.29	0.49	0.68	0.31
NM_001007	40S ribosomal protein S4, X isoform X isoform	0	260.23	98.29	86.27	78.87	125.1	108.58	73.69	50.83	348.62	525.15	88.4	104.65	422.33	52.01	263.96	73.29	120.25	66.14	57.36	86.33	178.3	69.72	85.77	204.04	159.05	75.98	407.42	150.67	28.39	142.29	134.9	221.16	123.77	309.81	131.51	145.42	191.54	82.88	115.75	72.15	79.86	84.65	147.03	188.64	110.68	280.08	96.75
NM_001008	40S ribosomal protein S4, Y isoform 1 Y isoform	0	0	0	0	0	145.41	0	133.99	74.36	0	0.97	118.4	182	0	84.5	0	132.64	164.53	86.22	0	99.81	0	119.2	0	0.38	168.37	109.58	519.16	0.7	43.64	0	204.61	0	0	0.16	409.11	382.97	0.13	351.3	0	232.65	0.04	0	236.94	0	172.69	387.85	157.79
NM_001039567	40S ribosomal protein S4, Y isoform 2	1	0	0	0	0	0	0	0	0	0	0	0	0	0	0	0	0	0	0.15	0	0.13	0	0.17	0	0	0.05	0.05	0	0	0	0	0	0	0	0	0.15	0.09	0	0	0	0.1	0	0	0	0	0.08	0.45	0.33
NM_001009	40S ribosomal protein S5	0	231.66	140.21	121	125.25	224.05	136.56	239.58	151.23	583.44	651.48	297.23	317.35	1295.88	138	464.26	164.33	211.19	129.9	83.98	155.43	301.9	160.73	166.86	408	466.13	251.68	1056.97	252.98	141.87	196.92	404.98	341.65	240.62	556.69	402.85	436.6	306.41	206.47	164.67	130.55	107.52	114.43	309.29	374.63	174.12	466.32	216.66
NM_001010	40S ribosomal protein S6	0	415.44	155.51	116.34	47.9	242.29	114.55	214.78	291.52	983.83	1211.13	298.17	406.87	1279.13	202.09	600.63	321.01	421.13	245.99	119.96	260.26	361.98	263.67	92.8	327.14	323.96	164.26	905.7	194.13	64.23	172.29	296.59	360.61	416.94	1201.24	851.65	1068.71	694.26	665.02	453.57	520.01	250.15	225.82	559.36	501.45	399.55	823.37	362.13
NM_001011	40S ribosomal protein S7	0	2.58	1.17	0.62	0.76	0	0.49	0.39	2.93	1.46	3.26	0.52	2.4	0	0.36	5.37	0.49	1.16	0.47	0.37	1.25	4.18	1.52	1.13	1.19	1.7	1.39	1.95	1.29	0	0.62	2.1	2.28	1.65	2.45	1.38	1.29	1.28	3.8	1.56	3.32	1.54	2.37	3.37	4.11	3.27	1.42	0.89
NM_001012	40S ribosomal protein S8	0	192.75	99.33	62.96	45.72	200.32	52.04	73.93	113.84	348.65	429.3	118.85	193.38	545.8	92.54	267.76	95.07	197.66	99.25	45.17	104.35	187.84	124.55	113.88	213.94	249.86	106.79	585.52	130.19	26.39	92.4	141.83	137.74	92.66	385.05	190.72	231.16	173.88	188.84	128.25	128.07	78.63	66.37	187.72	162.34	119.01	214.04	98.33
NM_001013	40S ribosomal protein S9	0	182.46	131.55	135.65	95.2	290.15	96.13	257.34	123.89	402.25	365.03	235.35	295	864.84	166.17	484.76	143.37	181.04	98.12	92.07	173.04	270.35	197.74	176.79	358.01	352.78	171.06	911.69	466.11	176.13	214.99	289.65	255.47	275.68	419.05	363.5	494.34	307.43	403.8	255.22	288.96	157.51	191.47	264.11	386.76	124.48	447.82	235.52
NM_002295,NM_001012321	40S ribosomal protein SA	0	0.82	0.71	0.36	0.1	0.35	0.22	0.74	0.63	2.32	2.94	0.25	2.07	9.81	0.24	2.24	1.1	1.36	0.95	0.18	0.87	0.61	0.09	0.11	0.76	0.75	0.13	0	1.22	0	1.18	1.27	0.4	1.83	4.54	2.76	2.91	3.46	2.89	1.65	2.58	1.31	1.35	2	2.17	1.72	1.79	1.12
NM_005055,NM_032645	43 kDa receptor-associated protein of the	0	0.39	0.08	0.56	0.13	0.13	0.19	0.07	0.31	1.01	0.22	0.17	0.24	0	0.22	1.48	0.65	0.2	0.2	0.26	0.32	0.08	0.48	0.15	0.62	0.72	0.42	0.6	0.85	0.23	0.12	0.16	0.57	0.54	0.18	0.4	1.85	0.21	0.82	0.76	0.48	0.12	0.29	0	1.2	0.15	0.11	0.86
NM_016176,NM_016547	45 kDa calcium-binding protein isoform 2	0	67.6	34.49	46.58	79.81	38.47	32.96	11.5	24.76	25.15	71.01	21.56	29.17	48.41	26.37	75.78	33.77	43.25	24.32	27.06	41.39	44.69	32.33	26.75	63.49	76.02	76.72	139.89	143.38	11.62	55.62	48.51	40.18	27.03	51.97	31.12	23.61	59.51	131.26	68.74	71	29.9	30.93	80.3	58.98	25.65	62.72	55.21
NM_001012661,NM_001012664,NM_001012662,NM_002394,NM_001012663,NM_001013251	4F2 cell-surface antigen heavy chain isoform a	0	92.82	35.01	35.76	68.29	15.97	30.46	38.97	23.76	61.03	85.37	47.74	30.55	30.82	19.3	48.58	20.85	23.02	12.23	12.17	44.62	25.75	17.11	17.76	40.76	64.02	47.89	78.6	198.21	18.57	50.98	37.03	42.42	32.94	39.45	65.83	110.85	43.04	52.35	45.38	51.63	51.4	36.15	46.85	44.45	31.65	66.98	24.41
NM_022836	5' exonuclease Apollo	0	2.55	0.84	0.74	3.12	1.22	0.46	0.24	1.04	0.73	2.16	0.54	0.5	2.22	0.44	1.16	0.33	1.32	0.63	0.38	0.55	0.96	1.39	0.31	0.97	0.99	1.24	2.55	1.61	0.21	0.94	2.21	0.99	1.11	3.61	0.69	0.9	1.36	0.95	2.5	1.06	1.27	0.49	2.5	1.13	1.9	2.01	0.6
NM_014595	5'(3')-deoxyribonucleotidase, cytosolic type	0	29.01	23.27	18.84	29.06	23.35	13.57	23.36	22.46	26.85	43.57	48.52	43.83	110.79	22.14	57.67	22.83	40.68	22.37	20.69	31.71	44.38	36.03	32.64	54.09	79.9	41.7	152.14	89.01	15.8	38.36	47.58	41.52	23.87	42.48	27.68	18.56	33.98	31.1	25.01	26.91	13.13	13.32	38.36	32.9	18.85	34.95	19.33
NM_020201	5'(3')-deoxyribonucleotidase, mitochondrial	0	14.24	1.75	2.92	10.39	8.13	1.58	3.76	0.83	3.86	15.46	9.3	4.73	30.73	1.79	21.67	22.88	7.91	2.36	10.92	5.59	3.2	2.75	1.78	47.48	8.05	7.71	11.79	5.82	4.87	5.23	3.15	7.47	9.43	6	3.01	3.18	12.71	9.38	3.26	4.96	1.56	4.23	7.03	18.41	3	10.61	6.34
NM_019001,NM_001042604	5'-3' exoribonuclease 1 isoform a	0	3.85	3.86	1.71	3.9	4.6	0.76	0.58	2.71	5.09	8.4	0.42	8.8	2.31	1.01	12.11	3.71	5.5	1.98	2.84	2.7	2.64	4.61	0.24	0.81	1.27	2.12	17.71	6.3	0.17	1.75	2.12	25.93	5.09	12.58	4.92	8.53	18.97	98.54	31.8	26.64	6.1	4.61	7.3	12.58	4.72	6.38	11.31
NM_012255	5'-3' exoribonuclease 2	0	20.79	12.19	6.68	22.57	7.51	4.55	1.74	6.46	14.85	39.27	2.15	8.43	6.48	4.39	22.97	8.46	14.65	8.64	8.12	6.24	8.5	12.46	1.87	5.15	6.6	10.95	24.84	14.15	0.9	10.14	11.99	9.16	17.78	24.94	12.31	16.41	25.32	70.32	38.88	32.76	14.47	12.47	35.14	21.58	17.25	32.14	22.85
NM_006252	5'-AMP-activated protein kinase catalytic	1	0	0	0	0	0	0	0	0	0	0	0	0	0	0	0	0	0	0	0	0	0.01	0	0	0	0	0	0	0	0	0	0	0	0	0	0	0	0	0	0	0	0	0.01	0	0	0	0	0
NM_006251,NM_206907	5'-AMP-activated protein kinase catalytic	0	3.23	1.46	0.58	1.83	1.85	0.56	1.38	1.78	4.65	8.01	1.11	4.75	5.28	0.96	5.18	1.75	3.78	2.15	1.15	1.45	1.74	4.05	0.37	0.4	1.16	0.86	2.55	1.2	0.1	2.4	1.34	3.92	7.13	13.98	10.66	10.37	11.48	38.46	14.91	15.51	5.03	4.18	8.07	8.61	3.72	5.39	7.47
NM_006253	5'-AMP-activated protein kinase subunit beta-1	0	16.84	8.86	9.38	13.22	8.4	6.58	3.19	2.71	7.46	22.61	4.74	12.56	13.42	3.95	18.22	14.2	10.72	4.51	5.72	8.9	7.36	10.18	2.41	6.22	10.36	10.54	35.92	27.76	1.28	12.72	7.92	21.09	7.6	15.1	8.38	8.41	12.68	81.13	19.66	28.07	13.37	11.2	14.89	18.41	9.72	22.33	14.11
NM_005399	5'-AMP-activated protein kinase subunit beta-2	0	1.98	0.66	0.22	0.61	0.7	0.22	0.18	0.57	0.33	2.64	0.36	1.71	2.41	0.39	3.02	0.49	1.39	0.8	0.36	0.65	1.32	1.37	0.07	0.1	0.59	0.16	1.69	0.98	0.06	0.72	0.69	0.86	0.72	3.07	1.24	1.2	2.47	2.6	2.46	2.18	0.93	0.61	2.09	2.3	0.9	0.79	1.23
NM_002733,NM_212461	5'-AMP-activated protein kinase subunit gamma-1	0	10.09	24.63	22.83	20.53	25.58	14.96	5.28	12.22	9.26	27.97	5.36	27.25	34.06	11.33	64.17	32.76	23.68	12.68	13.82	14.18	29.41	29.54	10.04	20.53	27.41	22.53	83.75	51.32	5.82	14.3	39.33	87.95	34.05	62.71	24.23	8.99	40	62.62	60.92	46.53	22.81	14.17	33.8	34.84	32.69	46.84	31.27
NM_024429,NM_001040633,NM_016203	5'-AMP-activated protein kinase subunit gamma-2	0	6.72	1.47	1.92	8.45	5.03	0.89	1.66	1.9	6.51	6.25	1.51	2.25	6.02	1.05	8.17	3.82	3.33	2.2	2.07	2.89	2.63	3.17	0.36	3.87	4.07	2.24	8.36	13.54	0.75	3.13	3.62	3.27	4.05	10.42	5.25	7.71	7.87	15.88	10.61	8.26	4.54	2.78	4.67	7.93	2.45	6.92	7.26
NM_017431	5'-AMP-activated protein kinase subunit gamma-3	0	0.14	0.03	0	0	0	0.01	0.02	0.02	0.12	0	0	0.22	0	0.02	0.05	0.07	0.11	0.03	0	0.02	0.08	0.06	0	0	0	0	0	0	0	0	0	0.11	0.65	0	0.06	1.3	0.21	0	0.11	0.43	0.09	0.02	0.07	0.23	0	0.09	0.19
NM_152729	5'-nucleotidase domain-containing protein 1	0	0.7	0.39	0.13	0.28	0.2	0.3	0.01	0.16	0.2	0.6	0.06	0.23	0.46	0.28	0.64	0.12	0.55	0.36	0.15	0.16	0.35	0.22	0.28	0.67	0.87	0.39	0.94	0.74	0	0.45	0.64	0.07	0.11	1	0.21	0.13	0.27	0.6	0.69	0.06	0.17	0.15	0.92	0.55	0.38	0.34	0.37
NM_001134231,NM_022908	5'-nucleotidase domain-containing protein 2	0	21.03	12.3	10.47	12.56	14.48	18.91	26.31	17.17	2.33	9.78	18.86	17.54	14.25	20.4	54.31	7.6	8.16	6.81	3.1	19.84	45.09	18.83	16.09	18.88	42	21.36	18.68	33.41	41.55	10.41	27.54	17.45	17.21	53.71	11.56	8.64	15.14	14.81	16.45	18.76	11.78	14.7	23.14	13.04	19.21	13.67	9.47
NM_001031701	5'-nucleotidase domain-containing protein 3	0	1.13	0.41	0.17	0.4	0.45	0.18	0.04	0.18	0.16	1.43	0.04	0.49	0.28	0.13	0.87	0.26	0.2	0.1	0.13	0.75	0.38	0.75	0.08	0.14	0.2	0.14	0.19	0.83	0	0.32	0.31	0.46	0.22	0.83	0.25	0.51	0.24	2.44	0.81	1.19	0.34	0.29	0.67	0.68	0.28	0.43	0.99
NM_002526	5'-nucleotidase precursor	0	0.46	0.64	0.21	0.54	0.55	0.23	0.02	0.03	0.18	0.83	0	0.59	1.67	0.13	0.91	0.09	0.99	0.66	0.25	0.09	0.14	0.36	0	0.09	0.73	0.14	0.77	0.04	0	0.27	0.53	0.11	0.22	0.95	0.53	0.53	1.33	0.89	0.6	0.19	0.28	0.11	0.61	0.97	0.28	1.28	2.47
NM_000550	5,6-dihydroxyindole-2-carboxylic acid oxidase	1	0	0	0	0	0	0	0	0	0	0	0	0	0.19	0	0	0	0	0	0	0	0	0	0	0	0	0	0	0	0	0	0	0	0	0	0	0	0	0	0	0	0	0	0	0	0	0	0
NM_000032,NM_001037968,NM_001037967	5-aminolevulinate synthase, erythroid-specific,	0	11003.7	55.82	68.46	392.85	1351.67	147.35	226.91	73.46	1570.57	4801.55	371.77	272.57	14543.7	23.12	1097.41	2357.17	47.63	94.12	481.08	218.36	34.08	99.58	15.94	3690	90.86	449.15	386.97	636.47	67.76	21.96	13.55	512.71	3956.76	124.35	276.6	432.82	2305.96	398.7	1031.87	481.13	433.36	530.18	6830.71	9717.19	76.52	2040.2	315.52
NM_199166,NM_000688	5-aminolevulinate synthase, nonspecific,	0	7.54	10.29	43.66	24.3	12.64	10.37	2.11	4.3	8.61	8.22	2.05	5	6.29	3.57	9.91	15.81	10.58	3.57	6.11	9.95	6.58	9.6	3.72	4.82	8.3	13.26	93.81	36.97	1.16	8.49	7.15	26.33	13.8	8.88	8.27	28.32	15.89	81.93	31.46	23.65	8.16	7.02	14.54	7.05	12.93	15.43	19.78
NM_001009811,NM_014984	5-azacytidine-induced protein 1 isoform b	0	2.17	1.48	1.39	4.43	1.61	1.67	1.05	0.24	1.37	2.04	1.57	0.7	3.24	0.96	1.89	1.1	1.64	1.05	0.88	2.17	1.06	1.21	1.6	2.54	2.96	3.53	5.52	3.08	0.98	1.78	2.15	1.77	1.25	0.7	1.52	1.54	3.52	1.14	1.81	1.28	0.41	1.17	3.25	1.59	0.82	2.78	1.83
NM_022461,NM_001134432,NM_001134433	5-azacytidine-induced protein 2 isoform a	0	6.82	4.1	1.58	4.62	5.1	1.13	1.27	3.59	4.95	12.93	1.21	6.36	4.26	2.15	15.6	6.11	5.67	3.47	2.32	4.35	4.84	7.67	0.56	0.71	2.42	1.83	8.56	8.62	0.68	2.87	2.71	13.09	6.6	11.19	6.41	7.18	11.01	47.08	22.35	19.52	6.27	3.41	8.28	7.8	4.62	5.56	9.89
NM_006441	5-formyltetrahydrofolate cyclo-ligase	0	7.08	19.33	30.97	31.65	53.79	15.75	1.32	20.3	11.32	8.87	2.01	41.25	37.3	17.66	132.49	133.08	19.23	11.7	19.22	22.29	27.52	41.56	8.28	18.06	17.33	25.27	135.01	102.07	2.72	6.04	34.52	156.24	69.07	53.07	14.3	47.02	34.16	315.72	132.31	96.94	13.08	11.29	16.6	27.66	33.46	35.77	109.35
NM_000524	5-hydroxytryptamine receptor 1A	1	0	0	0	0	0	0	0.03	0	0	0	0	0	0	0	0	0	0	0	0	0	0	0	0	0	0	0	0	0	0	0	0	0	0	0	0	0	0	0	0	0	0	0	0.25	0	0	0	0
NM_000863	5-hydroxytryptamine receptor 1B	0	0	0	0	0	0	0	0	0	0	0	0	0	0	0	0	0	0	0	0	0	0	0	0	0	0	0	0	0	0	0	0	0	0	0	0	0	0	0	0	0	0	0	0	0	0	0	0
NM_000864	5-hydroxytryptamine receptor 1D	1	0	0	0	0	0	0	0	0	0	0	0	0	0	0	0	0	0	0	0	0.04	0	0	0	0	0	0	0	0	0	0	0	0	0.22	0	0.02	0	0	0	0	0	0	0.05	0	0	0	0	0
NM_000865	5-hydroxytryptamine receptor 1E	1	0	0	0	0	0	0	0	0	0	0	0	0	0	0	0	0	0	0	0	0	0	0	0	0	0	0	0	0	0	0	0	0	0	0	0	0	0	0	0	0	0	0	0	0	0	0	0
NM_000866	5-hydroxytryptamine receptor 1F	0	0	0	0	0	0	0	0	0	0	0.11	0	0.03	0	0	0	0	0.04	0	0	0	0	0	0	0	0	0	0	0	0	0	0	0	0	0.09	0	0.05	0	0	0	0.03	0	0	0.05	0	0	0	0
NM_001165947,NM_000621	5-hydroxytryptamine receptor 2A isoform 2	1	0	0	0	0	0	0	0	0	0	0.03	0	0	0	0	0.07	0	0	0	0	0.01	0.01	0	0	0	0	0	0	0	0	0.06	0	0	0	0	0	0	0.03	0.06	0.04	0	0	0	0	0	0.01	0	0.04
NM_000867	5-hydroxytryptamine receptor 2B	1	0.29	0.02	0	0	0	0	0	0	0.08	0.22	0.08	0.09	0	0.04	0.14	0	0.08	0	0.03	0.01	0.04	0.03	0	0	0.32	0	0	0	0.04	0	0.03	0	0	0.34	0.3	0	0.16	0.13	0.11	0.57	0.12	0.1	0.28	0.1	0.07	0	0.12
NM_000868	5-hydroxytryptamine receptor 2C	1	0	0	0	0	0	0	0	0	0	0	0	0.01	0	0	0	0	0	0	0	0	0	0	0	0	0	0	0	0	0	0	0	0	0	0	0.03	0	0	0	0	0	0	0	0	0	0	0	0
NM_000869,NM_213621,NM_001161772	5-hydroxytryptamine receptor 3A isoform b	0	0	0.12	0	0.14	0	0.14	0	0	0.61	2.83	0.16	0.18	0.28	0	0.14	0	0.05	0.04	0.05	0.24	0.02	0.04	0	0.07	0.11	0	0.56	0.61	0.07	0.03	0.03	0	0.65	0.13	0.95	0.26	0.25	0.35	0	0.15	0.06	0.05	0.33	0.55	0.07	0.62	0.18
NM_006028	5-hydroxytryptamine receptor 3B precursor	1	0	0.02	0	0.18	0.22	0.04	0	0	0	0.06	0	0.06	0.37	0	0	0.09	0	0.01	0	0.12	0.02	0	0.06	0	0	0	0.71	0.09	0	0	0	0	0	0.09	0	0	0	0	0	0.1	0.04	0	0.08	0	0	0	0.04
NM_130770	5-hydroxytryptamine receptor 3C precursor	1	0	0	0	0	0	0	0	0	0	0	0	0	0	0	0	0	0	0	0	0.03	0	0	0	0	0	0	0	0	0	0	0	0	0	0	0	0	0	0	0	0	0	0	0	0	0	0	0
NM_182537,NM_001145143,NM_001163646	5-hydroxytryptamine receptor 3D isoform 2	1	0	0	0	0	0	0	0	0	0	0.06	0	0	0	0	0	0	0	0	0	0	0	0	0	0	0	0	0	0	0	0	0	0	0	0	0	0	0	0	0	0	0	0	0	0	0	0	0
NM_182589	5-hydroxytryptamine receptor 3E	1	0	0	0	0	0	0	0	0	0	0	0	0	0	0	0	0	0	0	0	0	0	0	0	0	0	0	0	0	0	0	0	0	0	0	0	0.09	0	0	0	0	0	0	0	0	0.02	0	0
NM_001040169,NM_199453,NM_001040172,NM_000870,NM_001040173	5-hydroxytryptamine receptor 4 isoform a	1	0	0	0	0	0	0	0.01	0	0	0	0	0.04	0	0	0	0	0	0	0	0.01	0	0	0	0	0	0	0	0	0	0	0	0	0	0	0	0	0	0	0.04	0	0	0	0	0	0	0	0
NM_024012	5-hydroxytryptamine receptor 5A	1	0	0	0	0	0	0	0	0	0	0	0	0.02	0	0	0	0	0	0	0	0	0	0	0	0	0	0	0	0	0	0	0	0	0	0	0	0	0	0	0	0	0	0	0	0	0	0	0
NM_000871	5-hydroxytryptamine receptor 6	1	0	0.09	0	0	0	0	0	0	0	0	0	0	0	0	0	0	0.28	0.05	0	0.03	0	0	0.03	0	0	0.02	0.79	0	0	0	0	0	0	0	0	0	0	0	0	0.04	0	0	0	0	0.04	0	0
NM_019860,NM_019859,NM_000872	5-hydroxytryptamine receptor 7 isoform b	1	0.46	0	0	0.1	0	0	0.07	0.01	0.08	0.25	0	0	0.56	0.04	0.04	0.05	0.02	0.06	0	0.07	0.01	0.02	0	0	0.05	0	0	0	0	0	0.04	0	0	0.05	0.04	0.12	0	0.25	0.04	0.16	0.05	0.06	0.05	0	0	0	0.04
NM_017570	5-oxoprolinase	0	7.18	6.09	2.58	3.42	1.91	0.37	0.44	1.33	1.17	1.08	0.3	5.11	3.79	1.35	4.95	4.1	1.56	0.9	4.05	1.96	3.85	5.46	2.06	3.46	2.87	3.95	2.18	2.81	0.81	4.17	1.95	22.05	0.9	0.63	0.82	1.47	1.83	14.24	2.19	6.1	0.89	1.3	1.76	2.75	0.27	0.45	3.68
NM_004705	52 kDa repressor of the inhibitor of the protein	0	0.48	0.09	0.06	0.03	0.13	0.07	0.06	0.15	0.25	1.26	0	0.36	0.19	0.08	0.25	0.05	0.23	0.14	0.13	0.16	0.23	0.11	0.01	0	0.02	0.16	0	0	0	0.24	0.19	0.15	0.18	1.3	0.38	0.45	0.7	1.11	0.4	0.67	0.37	0.26	0.28	0.61	0.34	0.31	0.42
NM_001166462,NM_002436,NM_001166461,NM_001166460	55 kDa erythrocyte membrane protein isoform 4	0	618.19	36.3	49.8	109.3	118.99	37.86	29.63	13.32	89.44	303.37	114.64	31.87	484.07	12.25	92.9	195.62	27.51	17.49	47.04	33.29	20.4	40.66	9	91.73	27.11	56.55	87.07	126.48	12.79	26.35	36.18	124.61	273.78	33.53	40.63	86.81	141.2	184.49	143.33	97.3	48.65	45.65	379.05	294.75	36.87	180.34	89.44
NM_003733,NM_198213	59 kDa 2'-5'-oligoadenylate synthase-like	0	39.61	24.65	123.19	369.3	36.64	45.11	17.2	10.5	34.3	76.74	60.99	17.86	14.81	9.11	77.15	38.45	45.9	11.59	48.54	17.86	14.27	23.63	18.47	29.37	34.96	40.07	214.48	1751.04	9.76	17.52	39.43	177.9	86.17	33.76	38.05	44.26	130.67	284.59	208.81	51.07	17.72	46.64	24.85	56.07	41.64	101.62	113.39
NM_006212,NM_001018053	6-phosphofructo-2-kinase/fructose-2,	0	5.18	5.79	0.35	0.84	2.1	0.56	0.06	0.76	0.89	1.51	0.04	10.4	1.76	0.37	2.94	5.97	1.12	0.57	1.03	1.02	2.09	4.35	0.14	0.31	0.44	2.08	3.17	1.2	0.07	1.38	0.49	16.22	1.94	2.58	3.31	3.3	1.55	165.19	6.61	23.57	3.76	2.8	2.5	1.97	0.48	1.33	4.48
NM_001145443,NM_004566	6-phosphofructo-2-kinase/fructose-2,	0	157.55	19.47	19.82	54.68	23.83	4.39	16.16	11.44	42.98	60.42	11.61	21.28	12.87	2.2	24.12	51.23	8.49	4.12	8.59	8.83	6.98	14.83	1.4	11.63	22.59	16.45	36.2	137.45	2.09	19.76	5.26	54.67	14.95	12.69	42.12	57.98	13.92	904.05	24.31	203.65	31.74	27.72	22.17	30.73	5.02	10.92	96.83
NM_004567	6-phosphofructo-2-kinase/fructose-2,	0	5.3	12.25	20.62	34.95	19.5	10.2	0.78	3.7	5.6	0.75	0.32	19.59	14.35	8.98	38.94	41.11	10.41	8.39	18.21	15.74	12.7	34.37	6.09	11.96	20.29	15.79	52.05	54.46	3.58	6.72	15.18	47.57	33.62	11.64	6.1	8.03	18.39	37.48	42.12	29.34	11.33	20.82	11.27	26.88	9.45	28.08	41.68
NM_002625	6-phosphofructo-2-kinase/fructose-2,	0	0	0.08	0.07	0	0	0.04	0.02	0.18	0.05	0.08	0.11	0.03	0	0.04	0.32	0	0.2	0	0.06	0.02	0.15	0	0.11	0	0.11	0.06	0	0	0	0	0.16	0.83	0	0	0	0	0	0	0.07	0.04	0.07	0.12	0.08	0	0.09	0	0.08
NM_002627	6-phosphofructokinase type C	0	19.3	24.47	12.57	15.87	11.33	10.84	2.51	9.62	6.23	15.04	2.96	9.2	7.31	6.42	23.16	9.51	27.3	7.22	6.52	18.7	17.86	7.03	10.81	21.9	18.99	29.79	58.32	41.88	2.94	16.34	22.99	8.05	9.39	18.57	10.28	10.43	34.68	23.94	40.72	30.52	12.93	7.18	52.36	21.58	29.88	33.22	17.34
NM_002626	6-phosphofructokinase, liver type	0	43.58	25.67	27.06	79.08	28.64	24.14	18.66	13.14	19.89	42.96	21.01	17.05	48.87	21.69	39.26	25.58	34.31	23.25	17.18	35.43	25.74	26.15	24.24	70.02	57.76	52.43	94.53	121.37	22.68	48.74	50.86	21.44	29.72	19.63	26.6	20.61	62.57	41.66	48.14	33.61	23.52	27.02	88.41	53.48	24.08	78.1	39.56
NM_001166686,NM_000289,NM_001166688,NM_001166687	6-phosphofructokinase, muscle type isoform 1	0	2.67	1.99	1.2	2.26	0.74	1.42	0.17	0.31	0.68	2.08	0.24	0.71	1.3	0.48	2.4	0.42	1.28	0.72	0.53	1.2	1.62	0.91	0.51	1.12	1.55	2.77	5.31	2.14	0.23	0.24	1.41	0.33	1.43	2.78	0.39	0.92	3.14	2.03	2.53	1.01	0.65	0.59	3.16	1.84	2.19	4.54	2
NM_002631	6-phosphogluconate dehydrogenase,	0	86.75	163.02	270.46	237.43	115.3	149.72	41.03	56.15	23.46	21.61	28.67	124.81	67.75	55.58	232.13	251.24	60.07	44.72	115.71	115.61	98.46	168.66	68.24	111.23	156.82	182.6	239.28	320.39	69.37	110.03	141.29	631.22	291.85	134.04	86.54	102.87	114.9	887.5	365.45	483.47	167.38	145.39	115.46	150.4	118.26	247.37	255.37
NM_012088	6-phosphogluconolactonase	0	54.95	28.93	60.07	97.96	73.2	48.65	108.32	40.23	56.63	49.09	99.51	57.17	199.92	63.48	157.47	86.02	63.39	44.2	45.36	55.57	58.04	87.99	49.72	132.66	135.67	74.26	199.02	239.3	81.21	53.94	110.53	107.93	119.76	53.94	58.44	54.77	69.93	63.6	79.33	52.48	35.41	36.69	54.03	92.85	29.34	106.41	44.55
NM_000317	6-pyruvoyl tetrahydrobiopterin synthase	0	12.43	3.17	0.44	1.54	2.38	0.42	1.73	6.94	6.46	12.82	1.2	8	4.26	2.16	11.01	2.52	4.24	1.89	2.01	3.19	4.65	4.58	0.87	4.65	5.57	3.08	9.73	10.91	0.54	3.17	2.6	3.81	4.48	24.37	11.83	20.37	6.26	38.78	11.87	15.82	6.54	4.06	5.24	8.83	3.67	2.21	3.83
NM_004894,NM_001127393	6.8 kDa mitochondrial proteolipid isoform 1	0	70.51	44.74	33.03	16.83	98.1	31.77	80.92	106.51	113.95	168.85	61.03	193.21	301.55	71.77	299.11	112.56	74.5	52.5	48.74	68.45	191.16	189.69	31.91	66.39	99.17	42.11	247.75	123.75	32.25	33.12	95.26	351.93	151.26	454.39	160.7	128.65	121.4	242.52	199.02	212.53	93.55	56.64	100.48	118.24	86.99	113.36	92.52
NM_001173524,NM_004600,NM_001042369,NM_001042370,NM_001173525	60 kDa SS-A/Ro ribonucleoprotein isoform 2	0	3.57	1.3	0.35	1.4	1.49	0.4	1.33	1.46	4.77	10.05	0.83	5.78	2.68	1.3	6.26	2.73	3.49	1.52	1.29	1.29	2.57	2.98	0.14	0.85	0.92	1.17	4.02	1.98	0.24	2.75	1.39	5.46	4.62	17.48	11.15	6.08	6.47	24.98	9.61	9.42	4.49	3.54	5.23	5.14	3.17	4.48	5.46
NM_002156,NM_199440	60 kDa heat shock protein, mitochondrial	0	1.9	5.46	4.2	1.67	6.77	2.34	0.24	3.45	2.33	6.17	0.28	3.35	1.94	0.97	7.31	3.73	3.53	1.1	0.71	2.16	4.17	2.1	1.8	1.64	1.68	5.9	23.3	4.06	0.03	2.03	1.94	3.36	1.54	9.03	1.42	3.06	4.58	3.93	10.19	6.47	1.21	1.06	4.16	1.39	10.82	3.46	7.47
NM_001080464	60 kDa lysophospholipase	1	0.17	0	0	0	0	0	0	0	0	0	0	0.03	0	0	0	0	0	0.01	0	0	0.02	0	0	0	0	0	0	0	0	0	0	0	0	0.08	0	0	0	0	0	0	0	0.02	0	0	0	0	0
NM_053275,NM_001002	60S acidic ribosomal protein P0	0	78.54	55.14	46.64	13.55	51.77	46.55	37.88	125.3	262.96	279.64	69.68	135.23	253.23	64.53	231.24	61.87	115.16	65.31	25.98	60.06	157.51	70.39	36.24	73.86	97.93	56.21	226.76	43.05	12.71	77.07	108.45	53.43	58.82	513.5	171.96	212.8	154.05	140.87	119.35	102.03	64.19	71.23	169.43	147.68	142.68	157.1	81.55
NM_001003,NM_213725	60S acidic ribosomal protein P1 isoform 1	0	747.94	226.32	255.81	278.67	611.48	202.66	312.6	390.62	1160.44	1129.04	1004.19	460.18	1889.63	401.66	1120.22	541.26	481.54	347.24	243.7	330.67	649.04	353.51	465.44	1550.45	1268.78	747.46	2302.27	1004.98	334.42	376.77	638.82	586.19	45.02	54.22	93.76	190.74	145.94	126.57	146.64	110.48	35.58	86.47	397.78	721.79	31.57	136.31	263.3
NM_001004	60S acidic ribosomal protein P2	0	1207.74	323.5	461.54	688.98	1008.55	368.71	503.34	307.88	1341.66	1686.37	1056.89	568.99	2699.03	294.55	1316.56	879.79	595.09	300.32	281.71	484.29	624.09	452.95	549.98	1801.68	1147.46	776.78	3223.38	1145.85	439.82	441.09	867.8	1079.88	1150.89	791.65	910.72	1064.72	1051.09	839.69	490.78	442.47	235.58	322.65	829.34	1690.53	336.8	1555.25	713.91
NM_015938	60S ribosomal export protein NMD3	0	2.07	0.99	0.27	0.65	1.11	0.18	0.81	0.91	2.18	6.98	0.58	1.42	1.48	0.4	3.93	0.33	2.63	1.09	0.51	0.53	1.61	1.32	0.07	0.12	0.63	0.64	0.41	0.7	0.07	1.41	1.07	0.7	0.75	5.38	5.12	3.45	3.25	9.1	3.4	5.44	2.74	2.05	2.58	3.66	1.53	1.87	2.14
NM_006013	60S ribosomal protein L10	0	11.35	6.14	7.52	12.64	5.57	4.63	6.65	5.93	7.87	9.62	7.6	9.34	18.51	5.86	19.34	8.16	7.95	7.57	4.22	10.37	10.16	13.07	3.89	9.96	12.65	6.81	14.38	22.33	6.17	10.79	14.75	9.18	21.29	19.08	13.46	15.31	13.79	19.15	17.14	21.63	15.44	10.1	12.26	15.4	7.68	24.71	9.66
NM_080746	60S ribosomal protein L10-like	1	0	0	0	0	0	0	0	0	0	0	0	0	0	0	0	0	0	0	0	0	0	0	0	0	0	0	0	0	0	0	0	0	0	0	0	0	0	0	0	0	0	0	0	0	0	0	0
NM_007104	60S ribosomal protein L10a	0	23.97	16.3	10.17	10.77	22.13	8.65	6.22	27.21	59.85	93.48	8.69	22.96	57.76	14.11	39.87	17.07	38.98	24.1	8.32	19.87	22.02	12.86	8.21	22.44	29.81	11.62	83.58	14.13	2.8	20.21	26.71	11.84	8.32	28.91	21.69	30.57	20.11	23.78	15.38	19.01	11.29	12.27	23.16	26.72	15.14	35.69	20.12
NM_000975	60S ribosomal protein L11	0	1215.3	419.51	260.28	182.03	1271.18	234.65	1369.79	1191.86	3465.98	3435.91	1391.47	1776.58	5587.25	839.85	2156.07	1302.19	1208.32	813.63	396.69	837.92	1630.61	1123.93	682.44	1998.43	1580.88	737.83	4312.88	1386.7	343.1	516.25	891.7	1931.42	1372.02	3296.04	1697.44	2089.33	1218.8	1246.73	1009.15	1071.64	611.92	441.6	1109.55	1257.08	656.34	1630.45	579.95
NM_000976	60S ribosomal protein L12	0	0.99	1.4	1.42	1.58	1.6	1.02	1.47	0.62	3.64	4.15	2.36	2.2	4.17	0.83	3.54	0.58	1.53	0.9	0.84	2.15	1.51	1.43	1.13	0	1.48	1.83	3.59	4.71	0.37	1.63	1.76	4.5	1.43	2.12	1.17	5.29	3.32	1.3	1.59	1.42	0.35	1.23	1.45	2.36	0.94	4.23	1.92
NM_000977,NM_033251	60S ribosomal protein L13	0	100.36	48.07	56.83	55.43	115.4	48.48	89.89	57.18	250.66	264.12	109.05	114.07	460.47	62.27	174.03	73.81	101.86	64.39	34.01	64.61	106.26	73.73	75.08	200.68	172.72	83.18	467.84	148.77	52.08	72.22	139.01	128.21	110.44	289.08	187.1	212.01	169.87	120.01	106.06	85.43	42.91	38.69	83.19	132.32	73.9	191.88	71.68
NM_012423	60S ribosomal protein L13a	0	90.34	42.78	37.73	33.36	84.24	38.62	45.3	46.44	240.59	260.8	74.61	77.05	309.6	41.67	131	45.92	109.81	71.01	31.04	62.63	72	63.57	43.98	113.93	123.57	59.01	328.63	92.39	16.18	75.38	87.72	65.86	69.5	178.83	150.55	180.54	177.87	133.73	97.34	63.68	48.95	59.76	156.73	133.64	97.61	276.34	102.69
NM_003973,NM_001034996	60S ribosomal protein L14	0	55.07	18.83	21.86	17.99	30.57	31.28	38.88	27.14	77.82	100.29	57.74	26.06	123.75	23.28	64.17	28.57	42.05	25.33	17.21	30.39	44.03	31.6	29.4	43.58	50.02	29.89	138.65	37.38	15.96	24.42	35.12	42.86	87.89	128.68	118.17	124.45	82.09	54.5	47.49	35.13	25.97	27.29	57.55	57.75	58.12	168.99	39.69
NM_002948	60S ribosomal protein L15	0	48.06	17.81	14.73	15.8	32	11.28	24.69	30.18	114.46	168.28	26.73	44.11	130.6	19.93	83.5	30.92	54.89	35.67	14.37	21.95	32.84	33.5	7.94	28.78	28.82	14.62	71.84	22.33	4.39	32.64	44.2	33.78	49.21	187.78	115.2	139.69	93.14	93.31	70.12	75.49	48.69	39.43	85.19	82.3	49.63	99.91	56.92
NM_001035006,NM_000985	60S ribosomal protein L17	0	21.99	8.58	4.21	1.79	9.57	3.2	2.44	10.88	29.46	38.57	6.75	12.83	32.76	5.21	23.61	8.37	13.62	7.12	3.75	10.12	14.61	8.25	3.02	10.3	13.51	11.09	72.09	21.61	1.84	8.26	13.85	7.92	7.74	30.62	14.89	33.16	11.33	30.09	15.89	12.64	11.47	7.85	17.65	16.69	9.39	9.3	9.55
NM_000979	60S ribosomal protein L18	0	604.27	314.61	346.36	368.91	537.45	328.02	456.01	273.5	1171.4	1155.62	664	437.06	1718.03	301.77	894.26	372.66	543.09	288.99	196.83	378.77	532.97	318.27	375.16	993.18	972.13	536.51	2181.92	799.81	299.55	441.64	711.24	496.25	468.7	746.19	789.49	1019.14	908.44	656.15	528.52	379.91	205.7	296.61	622.12	783.23	351.19	1094.97	498.03
NM_000980	60S ribosomal protein L18a	0	2.53	0.22	0.72	0.72	0	0.36	1.3	0.73	2.72	2.42	1.36	1.5	1.11	0.67	0.91	0	0.3	0.92	0.26	1.48	0.84	0.24	0.26	3.65	3.15	0.49	6.42	0.76	0.31	0.73	0.78	0.39	0.5	1.2	1.08	3.05	1.13	0.44	0.2	0.28	0.54	0.48	0.74	0.81	0.48	0.65	0.69
NM_000981	60S ribosomal protein L19	0	100.17	39.3	52.28	36.12	73.48	55.03	75.67	39.85	135.96	172.43	102.07	77.57	219.73	47.32	126.32	67.3	83.33	54.13	27.81	55.53	75.37	61.85	46.08	129.19	106.17	60.63	283.88	107.9	55.42	64.1	118.97	159.62	87.07	123.3	114.9	124.3	101.77	88.17	82.3	62.5	28.51	35.32	84.95	79.78	42.28	135.46	52.3
NM_000982	60S ribosomal protein L21	0	2.22	0.78	0.22	0	0.71	0.11	2.72	2.11	6.59	7.28	2.32	6.57	8.14	1.03	5.73	1.28	2.54	1.72	0	3.5	1.07	1.33	0.29	1.23	3.44	1.25	0	0.28	0.82	0.69	0.86	1.25	3.19	6.32	4.06	6.83	5.78	5.87	4.45	5.23	2.45	1.45	1.89	3.53	0.92	3.26	2.28
NM_000983	60S ribosomal protein L22 proprotein	0	17.3	6.35	5.23	5.63	9.08	3.88	5.7	5.29	28.04	52.27	7.34	12.17	26.56	5.89	18.25	8.05	17.73	9.26	4.02	7.97	9.43	8.39	1.77	5.74	10.25	6.01	29.05	5.63	1.64	7.37	11.75	9.41	13.51	34.4	27.81	34.84	32.95	19.31	15.87	11.7	8.96	7.08	15.99	17.24	11.86	32.4	15.4
NM_001099645	60S ribosomal protein L22-like 1	0	10.38	6.32	2.28	0.9	5.34	1.66	5.03	14.29	13.96	24.01	4.29	17.68	31.56	2.64	16.56	3.96	8.43	5.22	2.1	4.58	21.18	9.13	4.15	3.89	9.62	3.18	8.32	3.51	0.81	4.2	4.46	25.47	2.58	77.78	12.52	18.1	9.35	12.81	11.42	14.95	4.88	3.34	9.58	4.72	9.57	4.09	3.13
NM_000978	60S ribosomal protein L23	0	385.62	144.32	71.46	23.77	359.63	57.63	191.58	313.96	863.05	1025.79	191.4	577.61	1516.81	191.7	623.05	256.42	310.03	212.44	118.27	234.05	469.72	367.41	97.91	296.22	353.47	172.77	1135.69	264.28	71.25	156.75	325.31	435.3	262.95	1593.87	810.87	1044.73	388.13	531.04	306.88	405	196.69	110.21	365.69	322.19	224.28	304.54	212.75
NM_000984	60S ribosomal protein L23a	0	4.84	2.56	2.01	0.68	2.07	2.56	1	4.21	4.93	10.92	1.54	5.04	6.11	1.3	8.63	2.05	3.66	1.96	0.88	2.22	4.92	3.89	1.06	3.58	2.58	2.24	10.25	3.88	1.2	3.32	4.43	2.45	1.86	26.35	7.91	8.74	4.81	5.71	4.02	4.06	2.74	3.02	6.15	5.14	4.6	8.91	4.05
NM_000986	60S ribosomal protein L24	0	51.29	19.7	15.4	6.89	38.72	10.84	17.56	32.91	59.24	92.59	29.71	36.88	89.13	17.15	56.96	28.89	29.25	14.27	8.56	19.03	30.48	26.02	13.27	50.32	46.58	26.14	111.99	51.47	7.04	19.67	28.75	42.51	67.1	185.17	86.73	100.43	70.74	56.44	47.66	55.49	30.41	20.75	42.42	44.39	40.06	79.63	26.01
NM_000987	60S ribosomal protein L26	0	2.14	0.23	0	0	0	0	0.07	0.37	0.31	1.49	0.48	1.33	1.11	0.13	2.29	0.93	0.64	0.23	0.18	0.4	0.52	0.44	0.19	0.59	0.9	0.35	6.57	1.35	0.27	0.22	0.24	1.21	1.04	1.28	1.62	0.73	2.8	0.48	1.52	1.22	1.29	0.44	1.31	2.14	0.83	0.71	0.37
NM_016093	60S ribosomal protein L26-like 1	0	0	0.05	0	0	0	0.04	0	0	0.13	0	0	0.07	0	0.03	0.16	0	0	0.06	0	0.5	0.12	0	0	0	0.05	0.14	0	0	0	0	0.1	0	0.43	0.84	0.57	1.21	0.66	0	0.71	0.25	0.05	0.31	0	0.36	0.37	0.28	0
NM_000988	60S ribosomal protein L27	0	412.43	221.45	149.83	41.36	365.88	135.56	448.37	637.09	1590.17	1648.54	464.84	1384.11	3443.65	422.91	1297.03	575.19	746.47	411.11	197.41	408.4	720.47	550.03	144.44	410.13	559.13	294.24	1515.86	370.95	108.49	213.69	404.86	801.89	464.33	1994.6	917.79	1208.73	648.4	906.02	504.58	635.89	310.91	206.51	542.34	616.1	390.81	711.28	338.91
NM_000990	60S ribosomal protein L27a	0	14.07	6.42	4.82	3.94	11.27	4.6	8.14	6.07	14.04	21.82	11.19	12.35	24.06	5.65	14.11	6.88	10.4	5.1	2.79	6.25	8.12	8.42	6.25	17.82	16.62	8.05	45.74	15.33	5.92	6.99	11.54	18.81	16.31	42.64	25.18	28.42	18.78	14.2	11.04	11.12	7.05	5.52	13.34	13.3	10.16	24.03	6.19
NM_001136136,NM_001136134,NM_001136137,NM_001136135,NM_000991	60S ribosomal protein L28 isoform 4	0	109.06	46.27	88.47	108.67	104.42	67.9	155.09	57.14	194.42	188.26	184.62	89.63	261.75	61.84	180.06	100.41	105.82	58.18	57.83	86.36	82.38	64.27	61.72	142.64	126.47	81.8	259.75	309.49	85.24	87.14	117.9	190.86	213.2	166.44	206.38	205.48	235.53	213.85	188.11	93.14	69.35	110.88	168.79	200.06	99.69	384.99	155.83
NM_000992	60S ribosomal protein L29	0	31.15	11.16	12.94	20.4	25.84	11.61	26.93	38.1	77.83	70.49	61.02	52.1	140.59	22.6	80.35	29.13	58.01	24.12	18.4	25.04	32	18.54	14.15	56.51	38.69	20.59	71.09	43.95	8.33	15.75	21.48	24.53	28.46	27.59	62.1	81.09	13.94	41.34	41.68	22.14	11.32	31.55	59.89	68.33	19.7	72.17	28.67
NM_001033853,NM_000967	60S ribosomal protein L3 isoform b	0	155.17	87.64	74.93	53.85	150.99	60.54	53	74.5	370.21	431.99	102.41	101.25	377.63	74.47	234.11	100.67	178.68	108.21	50.92	92.11	133.49	90.91	78.67	225.69	230.2	144.68	566.13	122.47	20.39	120.15	168.6	80.13	136.53	391.28	297.74	353.71	315.9	271.65	206.37	153.33	88.24	103.75	281.12	250.08	138.5	387.4	197.24
NM_005061	60S ribosomal protein L3-like	0	0	0.04	0	0.51	0.93	0	0.26	0	0.17	0.16	2.14	0.13	0.46	0.2	0.14	0.23	0.1	0.03	0.03	0.33	0.6	0.13	0.06	0.22	0.15	0.13	0	0.92	0	0	0.22	0.63	0	0.49	0.09	0.28	0.54	1.81	0.49	0.52	0.05	0.05	0	0.32	0.1	0	0.42
NM_000989	60S ribosomal protein L30	0	978.06	382.06	318.31	215.06	758.28	267.45	573.01	589.76	2375.81	2831.83	949.8	1225.81	4733.69	399.12	1701.25	1098.64	972.44	519.72	327.94	563.84	764.59	652.13	151.63	813.18	668.69	336.18	2325.31	802.47	228.23	527.12	982.17	1250.59	1278.97	3295.41	1905.2	2364.8	1473.19	1924.53	1032.25	1032.3	689.47	426.41	961.6	1759.57	603.46	1643.5	780.51
NM_000993,NM_001098577,NM_001099693	60S ribosomal protein L31 isoform 1	0	63.58	18.17	9.68	3.62	56.03	5.76	56.88	24.96	96.86	120.73	67.34	98.35	124.3	25.14	69.36	46.66	52.21	28.13	15.1	27.42	42.41	35.12	11.02	39.81	43.1	17.3	136.36	29.64	13.53	13.04	32.86	74.16	60.18	206.31	105.52	148.92	69.5	116.52	64.6	63.96	29.82	13.41	47.77	61.44	32.22	42.92	28.35
NM_001007073,NM_000994,NM_001007074	60S ribosomal protein L32	0	36.3	13.73	13.14	10.13	32.69	9.54	19.81	11.42	43.89	54.75	40.65	38.23	84.23	12.51	34.12	24.07	25.86	15.26	8.55	14.45	20.77	17.67	7.69	28.94	34.58	11.83	89.91	21.92	16.9	11.26	29.59	49.2	35.7	66.38	41.81	50.9	36.9	26.82	19.47	19.35	14.91	12.43	24.78	34	20.27	61.96	16.36
NM_000995,NM_033625	60S ribosomal protein L34	0	6.67	4.41	3.3	1.79	9.41	2.26	33	12.45	47.55	68.25	19.98	56.91	44.15	9.69	32.27	12.45	21.68	10.21	6.19	10.95	18.27	13.06	2.29	7.57	13.15	5.87	41.01	12.69	2.76	4.11	12.11	31.7	6.09	54.41	32.08	42.71	19.64	30.25	21.45	27.31	9.08	3.67	12.1	14.69	8.98	11.26	7.38
NM_007209	60S ribosomal protein L35	0	244.57	144.26	117.11	37.27	198.84	110.82	432.18	207.96	654.66	546.88	509.17	461.33	1223.5	227.92	463.62	172.19	223.18	151.21	84.92	186.14	433.24	252.01	238.11	470.38	484.29	253.14	1144.44	378.08	168.45	167.27	375.18	557.85	135.96	490.22	339.09	420.71	265.34	233.83	186.71	176.39	58.06	60.89	177.04	170.33	80.93	166.92	90.67
NM_000996	60S ribosomal protein L35a	0	512.1	149.05	120.27	54.03	358.11	91.45	247.4	228.52	918.04	1026.08	431.48	453.91	1816.88	182.11	560.04	464.38	327.5	189.93	104.32	215.12	362.3	298.67	91.51	441.19	406.93	184.55	1068.84	305.98	143.2	142.46	328.67	732.64	781.41	1636.37	832.94	1025.68	676.69	757.98	445.25	486.02	239.67	136.14	382.14	521.38	276.99	540.73	236.99
NM_033643,NM_015414	60S ribosomal protein L36	0	308.1	154.7	159.77	134.17	286.94	141.06	238.32	111.72	462.92	475.57	393.16	240.25	752.67	163.73	365.91	200.31	233.21	141.08	91.69	156.63	291.12	194.61	290.28	817.32	716.43	304.19	1170.8	643.71	227.18	179.26	376.12	478.33	237.15	437.86	371.36	496.48	383.07	283.51	218.37	201.79	88.17	122.65	302.15	385.24	129.45	430.15	193.61
NM_021029	60S ribosomal protein L36a	0	1.4	1.2	0.54	0	4.02	0.14	0.36	1.86	1.76	1.65	0.42	2.17	4.35	0.21	1.48	0	1.04	0.2	0.24	0.26	1.64	1.56	2.81	2.7	3.47	2.34	7.23	0.35	0.86	1.14	0.46	1.58	0.68	3.96	1.49	1.33	1.55	0.6	0.83	2.18	0.75	0.57	1.35	2.2	2.14	1.36	2.37
NM_001001	60S ribosomal protein L36a-like	0	94.84	30.25	27.86	33.47	78.35	33.39	81.96	84.62	98.21	188.63	76.3	143.66	174.19	48.47	145.94	79.5	76.77	39.73	31.74	36.45	97.79	66.03	43.94	105.7	90.22	53.89	276.97	186.06	11.96	47.04	64.82	248.74	130.72	224.39	109.48	155.47	120.59	235.1	120.71	132.84	47.08	55.14	81.36	99.9	72.6	160.45	76.62
NM_000997	60S ribosomal protein L37	0	130.55	53.32	35.71	12.26	81.99	28.78	72.13	110.07	271.16	297.23	80.86	154.36	659.46	61.81	222.38	96.31	100.99	64.73	36.69	72.77	124.42	95.06	39.12	142.57	149.27	78.05	363.85	109.38	38.63	56.13	103.08	186.8	74.16	351.27	221.91	271.75	135.66	137.54	101.25	109.85	59.34	40.89	133.33	117.6	79.87	185.53	67.21
NM_000998	60S ribosomal protein L37a	0	595.88	162.54	184.86	216.15	440.22	150.43	209.84	208.32	763.29	953.62	328.93	370.04	1089.94	179.95	646.99	293.19	280.84	193.21	104.31	275.5	377.1	274.8	152.07	402.09	410.37	199.35	1447.79	511.67	146.46	259.75	407.53	374.09	582.69	1063.79	798.72	965.16	555.43	657.67	383.02	438.01	330.35	266.43	578.47	465.47	473.98	1243.56	365.88
NM_001035258,NM_000999	60S ribosomal protein L38	0	621.13	206.64	205.42	340.32	443.74	105.02	204.52	205.68	711.78	895.58	498.19	293.83	1164.36	179.72	530.54	407.57	316.73	178.75	127.84	230.88	283.47	191.07	174.31	764.8	545.46	335.09	1840.15	804.85	163.68	291.4	438.79	350.52	794.17	771.57	655.09	810.66	825.62	630.08	408.54	325.61	173.6	198.69	428.99	726.84	201.2	667.96	306.54
NM_001000	60S ribosomal protein L39	0	7.81	0.42	0.41	1.93	3.01	0.72	20.9	13.15	31.58	27	51.18	65.67	13.14	20.8	13.63	7.65	45.35	20.79	7.86	5.07	2.59	2.26	3.06	3.46	3.73	0.5	14.14	0.39	1.06	2.09	0.69	4.14	44.77	122.54	100.09	132.86	45.06	78.41	38.9	49.92	8.12	5.05	10.67	25.53	9.54	28.17	11.73
NM_052969	60S ribosomal protein L39-like	0	0.89	2.27	1.5	0.94	1.72	1.05	0.98	7.39	0.13	1.42	1.59	6.14	2.78	1.04	3.81	1.03	4.7	1.99	0.23	1.72	5.43	1.79	1.94	1.73	1.91	3.15	10.29	5.78	0	3.75	4.05	2.68	0.86	12.67	1.34	1.94	2.16	3.93	6.44	0.89	0.64	0.68	3.7	2.49	5.97	2.64	0.5
NM_000968	60S ribosomal protein L4	0	83.67	36.03	31.09	26.75	71.66	26.44	80.91	62.25	180.37	196.15	100.05	93.84	422.8	48.65	122.76	70.1	67.8	45.83	25.13	40.26	76.62	49.27	55.49	163.33	115.02	47.12	254.87	81.53	26.04	63.02	81.46	87.1	64.84	180.1	119.38	154.6	93.76	63.6	64.85	56.7	34.66	32.44	72.28	82.46	56.6	150.92	46.94
NM_021104,NM_001035267	60S ribosomal protein L41	0	67.19	20.33	14.21	13.28	40.43	12.33	22.8	26.9	36.14	107.82	59.68	53.28	165.03	19.43	71.94	99.64	34.13	13.79	14.21	39.71	40.62	30.85	12.24	70.83	44.33	36.69	179.18	70.29	18.56	17.75	58.99	47.46	59.54	119.93	27.91	42.1	44.59	56.31	30.62	61.77	27.78	13.87	41.41	62.05	25.36	47.89	21.77
NM_000969	60S ribosomal protein L5	0	77.28	22.45	12.47	15.25	50.07	14.24	32.82	33.2	158	182.97	48.09	60.17	175.3	26.68	72.01	30.83	59.74	38.58	19.04	29.37	53.43	38	14.49	41.45	55.11	31.61	160.59	33.41	4.55	39.26	38.37	52.35	61.29	270.54	144.12	166.63	118.04	115.95	82.66	76.87	26.4	18.3	63.63	53.06	35.89	57.99	40.35
NM_001024662,NM_000970	60S ribosomal protein L6	0	1.4	1.14	0.97	0.39	1.96	0.97	0.43	2.54	1.26	3.98	0.25	1.51	5.28	0.65	4.06	0.63	1.6	0.86	0.76	0.52	1.92	1.07	0.74	2.01	1.06	0.98	0.49	0.83	0.03	1.14	1.23	1.47	2.4	3.56	0.35	2.57	2.79	3.42	2.57	2.37	1.52	1.03	3.25	5.08	3.32	2.72	1.2
NM_000971	60S ribosomal protein L7	0	0.39	0.08	0	0	0	0.04	0	0.16	0.53	1.78	0	0.73	0.83	0.09	0.27	0.44	0.37	0.11	0.13	0.18	0.16	0.12	0	0.83	0.49	0.06	0	1.31	0	0	0	0	0	1.6	0.16	1.54	1.82	1.65	0	0.85	0.45	0.31	0	0	0.35	0.26	0.18
NM_198486	60S ribosomal protein L7-like 1	0	0	0.11	0.16	0.52	0.32	0.08	0.03	0.24	0.49	1.56	0	0.08	0	0.1	0.18	0.14	0.27	0.3	0.25	0.09	0.07	0.24	0.12	0	0.03	0.2	2.33	0	0.03	0.2	0.16	0	0.25	0.35	0	0.06	0.18	1.3	0.4	0.63	0.15	0.03	0.72	0	0.5	0	0.11
NM_000972	60S ribosomal protein L7a	0	114.09	34.95	50.58	58.29	115.44	48.88	19.46	26.31	145.16	166.29	39.1	40.1	149.57	26.78	116.93	49.67	48.88	28.05	26.42	45.74	82.89	52.12	52.23	128.67	173.43	63.61	304.2	104.73	31.72	87.17	139.15	89.03	66.92	166.47	72.6	86.38	92.48	82.75	68.52	38.36	41.82	38.19	78.96	79.36	67.84	134.47	54.31
NM_033301,NM_000973	60S ribosomal protein L8	0	1065.29	383.88	443.38	547.96	821.85	408.01	463.55	451.25	1413.55	1478.41	871.67	597.38	1979.31	443.62	1189.46	671.43	639.87	390.92	247.13	582.32	713.72	460.49	464.31	1332.24	1255.05	786.97	2985.17	1222.25	313.72	656.37	1028.54	595.77	830.01	1421.53	915.59	1211.85	1035.89	1123.58	757.97	554.86	315.93	307.41	807.33	1081.48	402.79	1131.87	549.3
NM_000661,NM_001024921	60S ribosomal protein L9	0	9.76	7.96	4.18	0.93	8.68	2.43	2.41	10.54	10.38	13.85	5.58	12	11.85	8.29	20.81	11.01	11.47	3	2.62	9.8	12.04	6.86	2.18	6.02	13.35	6.98	63.58	23.95	1.62	5.23	15.84	2.83	5.38	23.8	14.48	32.94	12	30.03	22.12	17.1	9.8	6.12	8.04	17.6	8.35	4.17	8.95
NM_016101	60S ribosome subunit biogenesis protein NIP7	0	8.48	2.61	2.1	6.14	3.69	1.09	0.87	2.35	3.77	17.35	0.22	2.64	5.09	0.76	4.75	2.15	5.46	1.8	0.81	1.62	3.5	2.74	1.07	1.75	2.48	3.53	12.28	4.23	0.3	4.06	3.43	2.5	3.55	12.93	4.72	3.76	7.91	12.14	6.97	5.41	3.26	3.02	8.83	4.92	5.53	6.87	3.72
NM_198949,NM_198948,NM_002452,NM_198950,NM_198952,NM_198953,NM_198954	7,8-dihydro-8-oxoguanine triphosphatase isoform	0	62.59	21.43	28.01	14.77	32.55	16.77	35.57	33.17	16.44	47.35	56.72	39.98	74.6	20.41	49.53	26.16	34.19	15.38	12.17	19.22	46.52	30.3	29.29	51.44	41.77	34.25	80.61	70.03	16.28	28.87	41.81	60.18	49.5	78.76	40.03	20.56	58.59	38.24	53.59	30.7	16.37	22.88	56.76	67.61	42.35	67.66	17.6
NM_004391	7-alpha-hydroxycholest-4-en-3-one	1	0	0	0	0	0	0	0.02	0	0	0.03	0	0.01	0	0	0	0	0	0.01	0	0.02	0	0	0	0	0	0	0	0	0	0	0	0	0	0	0	0	0	0	0	0	0	0	0.03	0	0	0	0
NM_001360,NM_001163817	7-dehydrocholesterol reductase	0	9.76	4.27	1.25	3.24	1.51	2.45	0.86	2.08	3.09	3.64	1.02	4.06	3.7	0.84	4.82	1.89	3.84	1.11	1.1	2.85	4.12	3.21	2.57	2.87	2.96	7.58	5.69	8.88	0.57	4.15	1.93	3.92	1.68	3.57	3.18	2.15	2.67	19.06	3.35	5.5	4.19	2.47	6.2	3.56	4.01	6.01	4.25
NM_019892	72 kDa inositol polyphosphate 5-phosphatase	0	2.24	1.36	1.05	2.75	2.27	0.76	0.18	1.04	1.96	3.66	0.45	1.16	3.7	1	2.94	0.91	3.22	1.41	0.71	3.26	2.09	1.31	1.1	2.58	3.05	2.46	7.98	3.9	0.38	1.53	0.96	0.97	1.25	1.1	0.56	1.45	3.12	1.3	2.12	1.51	0.84	1.13	3.58	3.4	1.29	4.2	2.49
NM_004530,NM_001127891	72 kDa type IV collagenase isoform a	1	0.1	0.02	0	0.13	0.11	0.03	0.09	0	0	0	0	0.01	0	0	0	0.05	0.03	0.01	0	0.09	0.01	0.04	0	0	0.08	0.02	0	0	0.04	0	0	0	0.07	0	0	0.07	0	0	0.07	0.13	0.01	0.11	0	0.06	0.06	0.06	0.01
NM_005347	78 kDa glucose-regulated protein precursor	0	76.56	19.72	31.76	25.86	11.78	26.03	11.56	14.16	48.91	39.23	13.96	28.01	11.75	12.34	44.76	21.69	12.68	6.5	4.68	68.69	30.25	15.9	8.6	13.98	30.44	41.88	37.24	47.79	1.42	17.55	8.14	27.82	13.66	73	35.06	194.17	31.75	89.41	65.92	73.74	23.23	19.65	40.76	23.75	50.34	29.79	58.08
NM_001194991,NM_001194990,NM_001194992,NM_019606	7SK snRNA methylphosphate capping enzyme isoform	0	22.55	10.69	10.89	19.27	12.36	9.48	12.06	3.6	10.52	60.31	9.94	10.37	26.93	5.9	25.03	13.64	16.13	8.86	8.85	12.33	8.67	11.82	5.6	16.54	22.9	14.89	50.94	54.72	6.43	10.65	14.71	16.79	25.38	11.96	11.74	16.54	25.81	43.6	23.57	12.03	8.43	15.52	20.92	23.81	10.42	42.55	30.63
NM_003906	80 kDa MCM3-associated protein	0	12.36	5.89	6.28	16.18	6.88	4.67	2.43	3.11	5.47	13.6	2.85	6.84	16.38	4.44	12.74	7.09	10.05	5.26	4.05	9.33	6.95	7.52	3.15	6.55	8.41	11.07	25.05	15.83	1.66	5.67	9.68	12.41	8.46	13.41	7.99	5.75	14.26	14.33	18.57	8.95	6.03	5.88	23.86	13.91	11.81	24.28	13.43
NM_001004426,NM_003560	85 kDa calcium-independent phospholipase A2	0	4.67	5.75	3.43	5.56	6	2.91	2.13	1.28	3.76	8.73	3.62	4.47	10.83	3.26	7.28	6.27	6.67	3.23	3.33	6.97	4.2	4.56	5.22	8.78	12.21	8.46	16.79	12.52	1.43	3.61	6.54	3.16	5.48	6.53	6.47	4.14	9	7.45	5.94	3.29	2.59	2.61	10.14	11.23	3.64	13.13	9.82
NM_005099	A disintegrin and metalloproteinase with	1	0	0.02	0.03	0.1	0	0.01	0.01	0	0	0	0	0.04	0	0.04	0.11	0.09	0.05	0.01	0	0.01	0.01	0.01	0.04	0	0.09	0	0.26	0	0.01	0.03	0.02	0.06	0	0.1	0	0	0	0.25	0	0	0.02	0	0.07	0.06	0.05	0.06	0.03
NM_080722,NM_139155	A disintegrin and metalloproteinase with	1	0.17	0.08	0.13	0.06	0.35	0.03	0.04	0.04	0.05	0	0.16	0.16	0	0.13	0.09	0.02	0.31	0.09	0.03	0.15	0.09	0.09	0.02	0.07	0.24	0.7	0.21	0.92	0.04	0.13	0.04	0.04	0	0.06	0.09	0.02	0.18	0.38	0	0.1	0.04	0.03	0.72	0.13	0.12	0.09	0.07
NM_007037	A disintegrin and metalloproteinase with	1	0	0.02	0	0.03	0	0	0	0	0	0	0	0.01	0	0	0.05	0	0.07	0.01	0	0	0	0.03	0	0	0	0	0	0	0	0	0.05	0	0	0	0.02	0	0.03	0	0	0	0	0	0.05	0	0.01	0.06	0
NM_139055	A disintegrin and metalloproteinase with	1	0	0	0	0	0	0	0.01	0	0.01	0.1	0.05	0	0	0	0	0	0	0	0	0.01	0	0	0	0	0	0	0	0	0	0.02	0	0	0	0.05	0.02	0.1	0	0	0	0	0	0	0	0	0	0	0
NM_025003	A disintegrin and metalloproteinase with	1	0	0	0	0	0	0	0	0	0	0	0.02	0	0	0	0.02	0	0	0	0	0	0	0	0	0	0	0	0	0	0	0	0	0	0	0	0	0	0	0	0	0	0	0	0	0	0	0	0
NM_014272	A disintegrin and metalloproteinase with	1	0	0	0	0	0	0	0	0	0.02	0.06	0	0	0	0	0	0	0	0	0	0.01	0	0	0	0	0	0	0	0.02	0	0	0	0	0	0	0	0	0	0	0	0	0	0	0	0	0	0	0.01
NM_139057	A disintegrin and metalloproteinase with	0	0.19	0.07	0.01	0	0.07	0.04	0.02	0.01	0.07	0.43	0.03	0.1	0.09	0.01	0.12	0.05	0.12	0.03	0.04	0.11	0.03	0.02	0	0.17	0.09	0.11	0.21	0.22	0.01	0.12	0.08	0.15	0.04	0.11	0.12	0.08	0.03	0.16	0.13	0.03	0.07	0.09	1.23	0.13	0.04	0.06	0.26
NM_199355	A disintegrin and metalloproteinase with	1	0	0	0	0	0	0	0.01	0	0.03	0	0.02	0	0	0	0.02	0	0	0	0	0.02	0	0	0	0	0	0	0	0	0	0	0	0	0	0	0	0	0	0	0	0	0	0	0	0	0	0	0
NM_030957	A disintegrin and metalloproteinase with	0	2.75	0.32	0.34	1.33	0.76	0.24	0.55	0.05	1.65	5.68	1.18	0.69	8.89	0.55	1.39	0.37	2.04	0.85	0.49	0.82	0.16	0.18	0.48	1.68	1.22	1.43	4.09	0.31	0.23	1.34	0.89	0.22	0.14	0.6	2.15	0.89	2.7	0.79	0.89	0.34	0.54	0.54	1.94	1.65	0.22	0.88	1.78
NM_006988	A disintegrin and metalloproteinase with	1	0.07	0.03	0.02	0.33	0.08	0.01	0	0	0	0	0	0.02	0	0	0	0	0.01	0.02	0	0.01	0	0.02	0	0	0	0	0	0	0	0.01	0	0	0	0	0	0	0.1	0	0.16	0.04	0.01	0	0.07	0	0.01	0.14	0
NM_007038	A disintegrin and metalloproteinase with	1	0	0	0	0	0	0.01	0.01	0.02	0	0	0	0	0	0	0.04	0	0.01	0	0.01	0	0	0.01	0	0	0	0	0	0	0	0	0	0	0.07	0.01	0.01	0	0.01	0.03	0.02	0	0	0	0	0	0	0	0.03
NM_182920	A disintegrin and metalloproteinase with	1	0	0	0	0	0	0	0	0	0.01	0	0.04	0.01	0	0	0	0	0.01	0	0	0	0	0	0	0	0	0	0	0	0	0	0	0	0	0	0	0	0	0	0	0	0	0.01	0	0	0	0	0
NM_014243	A disintegrin and metalloproteinase with	1	0	0.03	0	0	0	0	0	0	0.03	0.02	0	0.04	0	0	0.07	0	0	0.01	0.01	0.02	0	0.03	0	0	0	0.01	0	0	0	0	0	0	0	0.03	0.01	0.04	0	0.19	0.02	0	0	0	0	0	0.01	0	0.04
NM_139056	A disintegrin and metalloproteinase with	1	0	0	0	0	0	0	0	0	0	0	0.05	0.02	0	0	0	0	0	0	0	0.02	0	0	0	0	0	0	0	0	0	0	0	0	0	0	0	0	0	0	0	0	0	0	0	0	0	0	0
NM_030955	A disintegrin and metalloproteinase with	1	0	0	0	0	0	0	0	0	0	0	0	0.03	0	0	0	0	0	0	0	0	0.01	0	0	0	0	0	0	0	0	0	0	0	0	0	0	0	0.03	0	0	0	0	0	0	0	0	0.03	0
NM_197941	A disintegrin and metalloproteinase with	1	0.1	0.02	0.03	0.03	0.03	0	0.02	0.04	0.02	0.29	0.02	0.04	0.19	0	0.04	0	0.06	0.01	0.02	0.06	0.03	0.02	0	0	0.02	0.03	0.28	0	0	0.03	0	0	0.04	0.09	0.05	0.08	0.06	0.19	0.04	0.04	0.03	0.02	0	0.06	0.04	0.11	0.16
NM_133638	A disintegrin and metalloproteinase with	1	0	0	0	0	0	0	0	0	0	0	0	0	0	0	0	0	0	0	0	0.02	0	0	0	0	0	0	0	0	0	0	0	0	0.07	0	0	0	0	0	0	0	0	0	0	0	0	0	0
NM_014244,NM_021599	A disintegrin and metalloproteinase with	0	5.85	0.31	0.45	0.74	0	0.76	0.57	0.49	0.88	0.89	0.28	0.46	0	0.12	0.66	0	0.2	0.03	0.09	0.59	1.72	1.79	0.28	0	0.63	2.06	0.19	0	0.33	4.08	1.45	0.2	0.18	0.58	0.57	0.4	0.04	0.03	0.67	0.45	0.98	0.24	2.1	0.06	0.4	0.03	0.01
NM_139027,NM_139025,NM_139026	A disintegrin and metalloproteinase with	1	0.39	0.19	0.08	0.11	0.08	0.11	0.47	0.06	0.51	0.4	0.58	0.23	0.28	0.12	0.32	0.26	0.27	0.17	0.02	0.31	0.12	0.16	0.07	0.41	0.4	0.26	0	0.57	0.13	0.34	0.27	0.15	0	0.15	0.75	0.78	0.24	0.6	0.07	0.22	0.14	0.14	0.59	0.26	0.11	0.6	0.15
NM_007202	A-kinase anchor protein 10, mitochondrial	0	4.72	2.2	1.47	11.46	3.73	0.64	0.12	1.07	2.01	10.13	0.25	1.55	3.61	0.66	4.95	1.98	3.21	2.01	1.37	1.77	1.64	2.47	0.11	0.83	1.95	1.11	6.33	4.99	0.19	3.24	1.83	1.45	2.04	3.25	1.57	0.7	3.09	9.1	6.91	4.01	2.14	1.61	5.6	3.85	2.17	4.57	5.29
NM_016248	A-kinase anchor protein 11	0	0.84	0.43	0.14	0.92	0.59	0.09	0.06	0.31	0.79	1.67	0.17	0.71	0.37	0.34	1.69	0.58	1.56	0.79	0.13	0.41	0.56	0.47	0.08	0	0.24	0.28	1.58	0.72	0.08	0.25	0.42	0.24	1.43	5.13	1.3	1.21	3.71	3.23	2.81	1.42	0.96	0.43	3.01	2.36	1.31	2.55	1.95
NM_005100,NM_144497	A-kinase anchor protein 12 isoform 1	1	0.07	0.05	0	0.16	0.17	0.01	0.02	0.01	0.05	0.13	0	0.1	0	0.01	0.07	0	0.04	0.03	0.03	0.01	0.03	0.01	0.01	0.09	0.05	0.08	0.39	0.07	0	0	0.05	0.04	0	0.09	0.15	0.07	0.04	0.44	0.2	0.04	0.07	0.05	0.1	0.29	0.06	0.17	0.18
NM_007200,NM_006738,NM_144767	A-kinase anchor protein 13 isoform 2	0	18.53	7.74	14.49	27.99	11.69	5.84	0.84	2.32	6.36	20.34	1.41	6.4	6.66	3.31	18.75	15.72	9.67	4.74	5.24	8.11	4.17	5.72	2.04	4.82	9.38	12.78	55.32	31.36	1.21	5.93	6.64	26.64	13.51	10.83	9.14	11.52	20.23	53.9	34.24	18.25	8.26	6.89	24.44	22.13	8.86	24.6	27.79
NM_001008535,NM_178813,NM_001008534	A-kinase anchor protein 14 isoform c	0	0	0.04	0	0.26	0	0	0	0	0.11	0.3	0	0.49	0	0.04	0	0	0.11	0.05	0	0.1	0.16	0.06	0	0	0	0	0	0	0.05	0	0.33	0.28	0	0.18	0	0.21	0.13	0.67	0	0	0.05	0.05	0	0	0.04	0.74	0.08
NM_001004065,NM_001136562	A-kinase anchor protein 2 isoform 1	0	5.3	1.74	0.98	3.9	1.32	1.31	0.31	0.85	1.24	6.63	0.3	1.86	2.04	0.55	3.68	0.42	4.05	1.04	0.48	1.31	2.53	0.97	0.36	0.81	1.56	1.69	8.73	6.54	0.05	1.1	1.75	1.86	0.93	12.98	1.83	3.8	6.77	6.66	3.75	3.77	1.48	1.09	5.88	4.08	2.62	4.06	4.84
NM_006422	A-kinase anchor protein 3	1	0	0.12	0.05	0.29	0.07	0.05	0	0.07	0	0.08	0	0.13	0	0.02	0.14	0	0.15	0.08	0.05	0.06	0.16	0.04	0.06	0.05	0.06	0.15	0	0.37	0	0	0	0	0.11	0.1	0.05	0.08	0.04	0	0.13	0.03	0.07	0	0.2	0	0.11	0.2	0.23
NM_003886,NM_139289	A-kinase anchor protein 4 isoform 1	0	0	0	0	0	0	0	0	0.06	0	0.08	0	0	0	0	0	0	0	0	0	0	0	0	0	0	0	0	0	0	0	0	0	0	0	0	0	0	0	0	0	0	0	0	0	0	0	0	0
NM_004857	A-kinase anchor protein 5	0	1.06	0.17	0.07	0.2	0.34	0.04	0.07	0.16	0.6	7.33	0.15	0.55	0.65	0.13	0.09	0.09	0.27	0.28	0.07	0.06	0.21	0.28	0.06	0.1	0.26	0.14	0.21	0.85	0	0.28	0.31	0.18	0.5	1.05	1.07	0.42	0.46	0.63	0.38	0.43	0.09	0.12	6.26	0.74	0.58	0.88	0.27
NM_004274	A-kinase anchor protein 6	1	0	0	0	0.01	0	0	0	0	0.02	0	0	0.02	0	0.01	0.02	0.02	0.01	0.01	0	0	0.01	0	0	0	0	0	0	0	0	0.03	0	0	0	0.06	0.02	0	0.01	0.03	0.02	0	0	0.01	0.02	0	0.01	0.03	0.05
NM_016377,NM_138633,NM_004842	A-kinase anchor protein 7 isoform gamma isoform	0	0.67	0.53	0.11	0.67	0.71	0.09	0.12	0.7	0.95	1.07	0.4	0.81	1.2	0.31	2.31	0.44	1.43	1.02	0.38	0.48	0.75	0.86	0.03	0.74	0.54	0.27	0.77	1.61	0.07	0.34	0.79	1.01	0.86	3.72	1.61	2.11	3.37	5.42	3.37	2.18	1.63	0.75	3.34	2.39	0.63	1.62	1.27
NM_005858	A-kinase anchor protein 8	0	22.77	3.67	2.04	6.94	4.18	1.72	6.77	4.75	14.47	30.8	5.02	7.47	19.81	2.61	10.53	4.24	7.11	3.97	2.45	5.15	5.83	6.43	1.64	4.43	9.25	5.07	12.26	9.23	1.4	9.81	5.9	5.7	6.38	16.34	14.68	24.43	10.42	32.47	11.64	17.77	10.08	10.04	13.87	12.39	4.96	10.84	9.47
NM_014371	A-kinase anchor protein 8-like	0	56.78	12.51	21.42	38.35	19.82	22.58	25.67	3.39	21.82	53.35	43.07	13.97	53.31	13.09	26.59	23.39	18.19	11.49	13.27	22.82	13.05	18.14	14.7	33.65	41.29	29.4	73.08	82.7	14.84	26.12	22.11	18.9	40.9	19.17	26.78	24.11	38.32	41.34	38.32	29.25	17.85	29	37.37	36.23	23.57	67.89	27.79
NM_147185,NM_005751	A-kinase anchor protein 9 isoform 3	0	2.67	0.56	0.28	1.38	0.56	0.27	0.22	0.5	1.82	3.8	0.32	0.91	1.02	0.33	1.49	0.7	1.03	0.45	0.46	0.71	0.65	0.7	0.05	0.29	0.45	0.42	2.16	0.83	0.05	0.64	0.54	1.25	1.51	2.25	1.86	2.1	2.52	6.85	4.24	2.89	1.48	0.82	2.55	1.71	0.74	1.76	1.96
NM_001142644,NM_030623	A-kinase anchor protein SPHKAP isoform 1	1	0	0	0	0	0	0	0.01	0	0	0	0	0	0	0	0	0	0	0	0	0.01	0	0	0	0	0	0	0	0	0	0	0	0.04	0	0	0	0	0.01	0	0	0	0	0.01	0	0	0	0	0
NM_001048172,NM_001048174,NM_012222,NM_001048171,NM_001048173,NM_001128425	A/G-specific adenine DNA glycosylase isoform 3	0	4.87	4.24	3.05	6.2	4.49	2.59	1	3.05	3.86	12.91	0.92	4	11.94	2.24	8.61	3.08	6.44	2.89	1.97	4.17	4.72	3.41	2.83	3.68	9.72	6.24	22.48	12.41	1.08	5.8	6.26	5.15	2.8	5.7	3.62	2.09	6.29	7.01	3.98	2.42	2.43	2.61	9.35	6.47	4.04	8.09	4.21
NM_001135186,NM_016428	ABI gene family member 3 isoform 2	0	16.79	14.6	22.71	99.49	38.59	12.79	12.47	7.26	8.48	27.97	15.74	19.19	29.34	26.97	45.65	29.78	42.86	20.86	10.97	20.49	21.16	26.04	23.57	53.64	56.88	69.49	113.32	200.96	39.59	27.86	57.37	13.57	33.62	19.14	29.23	9.45	39.91	11.26	34.17	15.04	19.19	26.71	105.85	42.48	36.22	115.06	9.29
NM_001145272,NM_001145271,NM_014479	ADAM DEC1 isoform 2	0	0.51	0.11	0	0.09	0.17	0.01	0.23	0.01	0.83	0.51	0.31	0.25	0.56	0.08	1.78	0.51	0.02	0.16	0.2	0.1	0.09	0.06	0.02	0	0.06	0.04	0	0.07	0	0.29	0.03	0.2	0.11	0.43	0.88	1.26	0.09	0.67	0.05	0.66	0.11	0.12	0.44	0	0.12	0.09	0.08
NM_052866,NM_001040272	ADAMTS-like protein 1 isoform 2 precursor	1	0	0	0	0	0	0	0.02	0.01	0	0	0	0	0	0	0	0	0	0.01	0.01	0.01	0.01	0	0	0	0	0	0	0	0	0	0	0	0	0	0	0	0	0	0	0	0	0	0	0	0	0	0
NM_001145320,NM_014694	ADAMTS-like protein 2 precursor	1	0	0	0	0	0	0	0	0	0	0.06	0	0	0	0	0	0	0	0	0	0.03	0	0	0	0	0	0	0	0	0	0	0	0	0	0	0	0	0	0	0	0	0	0.01	0.03	0	0	0	0
NM_207517	ADAMTS-like protein 3 precursor	1	0	0	0	0	0	0	0	0	0	0	0	0	0	0	0	0	0.01	0	0	0	0	0.01	0	0	0	0	0	0	0	0	0	0	0	0	0	0	0	0	0	0	0	0	0	0	0.01	0	0
NM_025008,NM_019032	ADAMTS-like protein 4 isoform 2	0	10.96	6.67	10.96	25.79	6.95	3.84	1.85	1.7	0.34	2.19	1.67	4.52	7.68	5.19	20.78	11.26	7.26	4.88	7.11	20	6.19	7.68	3.75	8.71	13.14	13.33	26.68	54.35	4.78	11.38	11.01	18.02	10.61	5.58	2.48	2.68	14.05	19.18	22.23	16.64	11.46	9.08	14.2	16.21	4.84	18.64	10.33
NM_213604	ADAMTS-like protein 5 precursor	0	0.43	0.17	0.16	0.08	0.07	0.15	0.08	0.06	0.16	0.25	0.16	0.27	1.85	0.24	0.43	0	0.44	0.26	0.15	0.1	0.36	0.12	0.1	0.36	0.64	0.23	0.11	0.28	0	0.16	0.36	0.59	0	0.36	0.07	0.03	0.28	0.19	0.49	0.22	0.1	0.15	0.26	0.61	0.3	0.71	0.18
NM_001124	ADM precursor	0	133.22	32.51	73.96	88.32	55.33	23.24	48.32	41.16	42.71	21.91	42.74	139	24.99	14.74	53.26	66.48	54.37	14.49	58.71	141.87	31.79	87.74	15.66	34.48	49.67	71.02	172.36	139.67	3.05	38.51	33.4	289.88	62.37	25.81	87.79	165.2	45.06	973.17	107	250.51	44.14	48.25	40.59	55.81	16.08	24.79	142.39
NM_024866	ADM2 precursor	0	0.6	1.85	0.69	0.68	0.66	0.84	0.15	0.26	0.21	1.29	0.08	0.42	0.19	0.46	0.59	0.26	0.6	0.16	0.32	0.58	1.44	0.25	0.38	0.69	1.58	1.62	3.94	2.18	0.05	0.29	0.9	0.96	0.07	0.76	0.54	1.78	0.88	0.73	0.42	0.24	0.03	0.25	1.22	0.36	0.48	0.34	0.45
NM_014913	ADNP homeobox protein 2	0	9.13	1.19	0.51	1.91	0.97	0.27	1.38	1.33	5.47	15.68	1.42	2.4	2.59	0.67	2.51	1.05	2.15	1.04	0.69	1.13	0.87	0.94	0.14	0.48	0.6	1.05	2.55	2.2	0.11	2.66	1.26	1.05	1.51	7.5	8.08	7.95	3.34	16.96	4.8	7.35	3.65	2.54	5.23	4.69	1.67	2.58	3.24
NM_031284	ADP-dependent glucokinase	0	51.48	18.04	13.96	28.16	23.48	7.71	6.43	11.98	25.11	55.4	7.11	25.83	36.84	9.63	52.96	22.57	25.83	17.33	12.77	20.37	17.79	25.82	2.92	8.63	19.21	13.86	63.75	42.68	2.96	22.55	17.95	50.79	19.54	53.24	24.98	32.64	30.36	114.24	61.83	65.35	34.7	24.48	34.07	47.33	15.07	34.75	41.8
NM_198038,NM_024047	ADP-ribose pyrophosphatase, mitochondrial	0	2.77	3.34	3.83	4.35	2.96	2.86	0.4	1.54	1.05	6.15	0.33	2.48	1.57	1.57	7.68	4.03	4.8	1.42	1	4.71	3.09	1.8	0.95	2.14	4.33	4.88	14.01	7.63	0.61	2.5	4.12	2.22	4.95	8.39	1.82	1.21	9.05	11.51	10.95	11.14	4.23	1.52	9.07	4.56	9.4	8.34	8.68
NM_001775	ADP-ribosyl cyclase 1	0	21.66	9.91	3.54	4.67	6.76	13.29	1.78	5.59	2.92	13.69	1.82	9.35	7.03	5.08	19.3	2.05	14.97	4.33	2.43	5.06	20.22	3.94	3.39	2.44	8.54	11.34	14.44	15.11	1.27	10.69	3.12	6.51	3.41	93.59	7.22	3.44	24.62	25.14	11.13	9.53	4.19	4.04	32.49	6.86	11.01	12.94	4.54
NM_004334	ADP-ribosyl cyclase 2 precursor	0	8.89	45.44	54.05	96.85	65.38	22.31	4.14	21.84	4.73	5.29	3.09	55.75	30.27	15.51	110.72	89.17	35.14	17.34	29.48	40.37	30.47	69.35	6.57	25.22	42.49	29.67	124.21	113.89	4.98	31.25	44.12	149.19	72.62	81	23.45	38.45	54.46	414.14	175.17	191.6	54.91	39.97	15.4	67.81	23.56	55.94	141.38
NM_001024226,NM_001658,NM_001024227,NM_001024228	ADP-ribosylation factor 1	0	359.77	102.22	135.08	280.87	156.67	85.68	35.83	82.4	162.79	298.66	95.6	79.61	188.54	56.27	263.46	164.68	134.17	79.82	91.72	110.94	110.51	113.34	52.77	148.43	165.2	188.14	412.02	478.24	21.4	150.38	133.04	126.5	147.82	162.81	156.79	243.76	200.9	675.99	288.05	249.29	124.26	159.66	296.14	283.72	109.98	238.95	311.77
NM_001659	ADP-ribosylation factor 3	0	63.43	23.68	42.08	103.03	33.27	24.76	8.18	8.78	11.95	38.92	7.54	20.72	18.05	10.86	53.62	39.9	36.31	19.33	22.88	22.22	19.84	23.9	10.19	26	35.44	42.89	112.16	84.71	11.48	33.4	34.33	56.1	59.14	32.7	26.58	18.96	58.77	197.34	85.72	78.8	38.59	34.86	54.35	48.33	33.71	94.01	65.34
NM_001660	ADP-ribosylation factor 4	0	32.45	16.3	13.07	20.17	13.91	10.62	5.19	22.86	32.55	70.41	16.53	29.21	28.04	10.34	73.68	18.68	24.49	13.69	10.11	17.27	28.33	18.65	3.97	10.18	17.64	16.62	56.84	36.27	2.75	13.46	19.95	29.66	29.43	108.74	41.74	74.39	38.36	168.36	71.49	77.54	31.19	23.64	34.46	43.64	31.27	33.42	51.23
NM_001662	ADP-ribosylation factor 5	0	124.65	61.67	91.26	159.46	135.14	73.02	59.89	66.39	72.34	135.55	80.21	133.47	285.07	72.09	244.53	147.4	125.06	95.51	86.16	83.91	94.81	145.15	69.79	164.81	181.35	113.46	374.65	331.02	39.93	110.55	148.25	198.55	200.41	161.81	114.6	83.95	183.92	316.1	224.63	159.73	106.56	118.17	184.03	228.85	94.67	301.22	192.36
NM_001663	ADP-ribosylation factor 6	0	40.11	6.79	8.86	34.49	12.94	6.16	4.62	8.56	17.17	38.75	9.26	9.99	13.05	6.88	25.05	11.64	19.74	11.41	7.19	14.86	8.64	9.56	3.7	18.2	18.99	16.96	42.91	51.56	1.71	21.22	15.58	11.77	12.76	28.19	20.32	30.81	21.79	39.51	26.44	32.95	18.54	16.58	35	31.06	15.34	30.18	21.54
NM_032389	ADP-ribosylation factor GTPase-activating	0	47.46	18.97	22.33	52.54	24.67	20.22	15.59	5.96	15.11	60.07	15.58	14.44	45.63	15.08	47.85	25.7	31.34	16.51	15.82	21.15	19.68	22.27	11.85	36.97	47.2	36.5	94.96	83.29	12.9	26.46	37.71	33.76	48.25	35.6	43.63	11.21	53.3	65.25	42.55	37.39	26.96	31.13	58.46	46.75	30.97	98.64	37.3
NM_175609,NM_018209	ADP-ribosylation factor GTPase-activating	0	24.14	15.62	17.08	30.28	24.56	13.59	11.24	5.45	20.01	25.63	13.05	13.61	39.24	14.39	39.81	20.61	18.68	12.13	10.63	23.29	20.8	18.99	12.51	23.96	33.83	23.54	67.6	62.22	14.81	15.53	24.11	29.99	18.46	14.25	17.38	13.17	30.7	41.22	32.31	20.62	8.19	16.9	28.38	35.23	10.48	33.11	28.52
NM_014570,NM_001142293	ADP-ribosylation factor GTPase-activating	0	17.15	6.77	3.57	10.46	6.48	3.66	2.06	4.72	29.38	27.68	5.17	6.54	8.33	2.96	12.79	8.35	7.91	4.63	3.27	4.26	7.71	7.93	0.91	3.06	5.49	6.06	15.25	11.54	0.4	5.4	5.36	6.77	10.9	39.51	20.39	54.94	17.94	61.13	23.8	31.44	9.64	9.22	19.47	16.73	11.97	13.48	22.52
NM_013365,NM_001001560,NM_001172687,NM_001001561,NM_001172688	ADP-ribosylation factor-binding protein GGA1	0	34.33	13.22	9.19	16.64	11.51	8.1	10.41	5.93	26.57	35.92	14.4	15.84	30.45	8.98	23.46	12.66	14.86	9.56	8.62	18.72	11.95	15.22	9.19	23.39	31.5	22.22	33.07	31.71	5.87	14.84	17.13	23.17	14.37	13.62	22.76	21.77	21.24	53.61	22.28	27.46	15.85	22.03	46.52	28.02	8.65	32.4	19.66
NM_015044	ADP-ribosylation factor-binding protein GGA2	0	21.3	7.69	4.18	12.98	6.88	5.01	4.79	2.69	24.28	47.05	3.59	8.03	23.42	4.43	15.42	5.83	11.12	5.67	2.84	11.19	7.92	9.04	2.04	6.69	9.8	8.42	34.55	21.9	1.9	8.49	8.77	4.32	6.81	14.91	30.19	19.22	14.01	17.98	11.55	10.62	8.61	7.58	25.83	15.95	9.55	30.38	13.19
NM_014001,NM_138619,NM_001172704,NM_001172703	ADP-ribosylation factor-binding protein GGA3	0	17.3	10	10.49	25.2	10.81	6.49	2.92	2.3	13.81	21.85	3.68	6.02	14.07	4.81	17.95	10.66	12.23	6.76	7.63	12.86	8.49	11.79	3.82	8.19	14.36	14.46	47.64	24.89	3.29	12.68	10.14	11.16	10.65	9.08	10.3	8.33	15.11	26.6	19.33	14.82	12.01	10.65	20.81	15.17	9.36	24.82	19.26
NM_016638,NM_001002252,NM_018694,NM_001002251	ADP-ribosylation factor-like protein	0	101.61	50.58	69.21	88.25	103.47	64.43	121.63	55.11	75.2	148.75	128.72	101.8	298.03	69.07	165.47	94.98	95.59	66.04	41.34	67.05	132.41	137.08	88.21	186.04	192.74	89.36	248.05	255.38	72.61	107.3	139.52	146.12	156.46	179.62	155.02	93.89	163.55	118.2	116.96	102.97	47.56	67.7	112.52	130.12	59.87	171.57	66.7
NM_015161	ADP-ribosylation factor-like protein	0	33.92	11.24	8.76	11.33	19.85	4.56	3.22	18	37.62	82.48	6.22	20.49	24.99	6.79	33.25	9.79	21.8	12.64	4.95	6.01	12.51	12.45	2.08	4.82	7.64	10.47	32.24	14.92	0.98	9.82	16.17	13.68	18.89	104.85	51.29	77.29	41.91	80.15	60.11	52.11	19	13.19	58.44	41.35	37.91	41.53	33.22
NM_152522	ADP-ribosylation factor-like protein	0	1.35	1.25	0.69	2.95	2.23	0.32	0.19	2.11	0.86	3.05	0.56	1.11	1.67	0.41	3.45	1.1	3.38	1.57	0.89	0.92	1.28	2.22	0.29	1.23	1.46	1.59	7.66	2.94	0.04	1.35	0.81	1.93	2.44	11.04	1.51	4.11	6.84	18.93	10.79	5.37	2.17	0.78	4.57	4.53	3.65	3.15	4.39
NM_001177	ADP-ribosylation factor-like protein 1	0	3.04	3.1	1.01	1.7	1.89	1.34	0.35	3.61	2.25	10.57	0.41	4.82	4.54	2.19	9.41	2.5	4.73	2.32	0.87	1.78	6.77	3.93	0.72	1.85	2.66	1.69	8.34	3.38	0.28	2.52	3.06	3.57	2.26	22.62	3.61	1.48	6.07	9.51	7.57	5.99	3.56	1.97	8.53	4.63	4.9	5.59	3.6
NM_173664	ADP-ribosylation factor-like protein 10	0	0.65	0.23	0.06	0	0.25	0.01	0	0.06	0	0.32	0	0.02	0.28	0.07	0.14	0.44	0.22	0.08	0.05	0.07	0.16	0.04	0.02	0.29	0.08	0.36	0	0	0	0.05	0.06	0	0	0.13	0.09	0.54	0.34	0.13	0.11	0.07	0.03	0.07	0.25	0.1	0.04	0.09	0.33
NM_138450	ADP-ribosylation factor-like protein 11	0	0.51	4.79	5.78	11.85	8.52	2.67	0.43	1.47	0.84	1.22	0.37	3.83	4.17	2.36	16.62	7.44	4.48	2.55	5.39	3.51	4.9	9.09	0.89	2.54	5.94	4.93	29.37	21.29	0.96	1.96	7.43	12.14	8.42	6.91	1.88	1.3	8.81	20.55	22.33	9.96	5.92	1.98	4.06	6.11	2.62	9.05	11.81
NM_001162490,NM_001162491,NM_001012990	ADP-ribosylation factor-like protein 13A isoform	1	0	0	0	0	0	0	0	0	0	0	0	0.04	0	0	0	0	0	0.02	0	0.04	0	0	0	0	0	0	0	0	0	0	0	0	0	0	0	0	0	0.35	0.09	0	0	0.03	0.1	0	0.02	0	0
NM_001174150,NM_001174151,NM_182896,NM_144996	ADP-ribosylation factor-like protein 13B isoform	1	0	0.04	0	0.11	0.1	0.01	0.01	0.02	0.04	0.13	0	0	0	0.01	0.05	0	0.09	0	0.03	0.12	0.01	0	0.02	0	0.01	0	0	0.2	0	0.02	0.02	0	0	0	0.02	0.12	0	0.22	0	0.07	0.02	0	0.12	0	0.04	0	0.15
NM_025047	ADP-ribosylation factor-like protein 14	1	0	0	0	0	0	0	0	0	0	0	0	0	0	0	0	0	0	0	0	0	0.1	0	0	0	0	0	0	0	0	0	0	0	0	0	0	0	0	0.22	0	0.13	0	0	0	0	0	0	0
NM_019087	ADP-ribosylation factor-like protein 15	0	0.89	0.34	0.43	1.33	1.46	0.18	0.02	0.14	0.71	0.95	0.04	0.39	0	0.17	1.71	0.44	1.01	0.34	0.53	0.33	0.38	0.51	0.03	0.14	0.47	0.2	0.11	0.76	0.19	0.72	0.7	0.39	0.97	3.17	0.84	0.34	2.34	2.89	3.95	1.94	1	0.55	1.91	2.62	0.77	1.48	2.44
NM_001040025	ADP-ribosylation factor-like protein 16	0	3.13	3.35	2.34	4.25	4.54	2.18	2.39	2.79	4.73	8.94	2.89	8.25	21.47	4.24	11.46	3.47	7.02	4	2.9	6.28	7.97	6.42	2.91	5.51	8.67	5.05	21.44	11.62	2.11	5.58	8.4	4.95	7.74	11.04	6.23	4	9.45	6.21	7.67	6.05	4.13	3.27	5.87	11.06	3.51	10.64	5.07
NM_001103154,NM_001039083	ADP-ribosylation factor-like protein 17 isoform	0	0	0.09	0.22	0	0.55	0.17	0	0.29	0.12	0	0	0.14	0	0.2	0.6	0	0.33	0.03	0.07	0	0.41	0.07	0.07	0	0.2	0	0	0.22	0	0.09	0	0.96	0.39	0.8	0.27	0	0.94	0	0.34	0.24	0.3	0.17	0	0.32	0.55	0.54	0
NM_001667	ADP-ribosylation factor-like protein 2	0	21.18	18.73	29.28	35.55	21.66	22.43	10.72	9.41	5.26	12.86	12.32	17.27	25.64	15.48	49.44	17.16	29.67	13.76	12.41	23.55	26.59	21.6	19.67	39.43	44	36.47	123.33	69.95	25.6	14.74	41.59	47.7	31.26	24.31	7.37	6.92	53.46	18.64	43.51	15.91	11.94	5.77	32.69	30.9	30.72	61.13	23.57
NM_012106	ADP-ribosylation factor-like protein 2-binding	0	16.72	4	2.53	15.86	4.79	3.16	1.96	4.29	11.26	35.44	3.2	5.86	16.66	4.17	19.23	5.85	10	6.14	2.41	3.74	7.12	5.6	1.15	3.22	5.49	4.87	16.13	8.42	1.48	7.77	8.29	3.03	7.71	29.19	15.49	10.02	12.49	18.14	14.55	15.95	11.92	6.84	19.06	16.18	7.13	22.67	9.03
NM_004311	ADP-ribosylation factor-like protein 3	0	0.41	1.99	0.89	1.2	2.09	1.11	0.32	2.89	1.12	0.75	0.41	2.79	2.59	1.49	6.97	1.91	2.01	1.42	1.05	1.84	5.45	4.39	0.83	1.16	2.58	1.52	3.7	2.22	0.59	1.11	3.78	2.13	6.42	11.28	2.24	2.74	3.47	5.14	4.9	4.53	1.9	1.54	3.27	3.49	3.3	3.77	2.07
NM_212460,NM_001037164,NM_001195396,NM_005738	ADP-ribosylation factor-like protein 4A	0	6.75	0.37	0.16	0.41	0.56	0.04	1.49	1.28	3.56	9.16	1.19	2.31	2.22	1.06	5.46	1.87	0.81	0.39	0.32	1.25	1.77	1.15	0.08	0.22	0.6	0.56	0	2.2	0.13	0.86	0.54	0.29	2.98	4.53	2.41	15.32	1.34	11.6	6.93	11.2	3.44	1.19	3.47	2.65	0.71	0.57	1.59
NM_005737	ADP-ribosylation factor-like protein 4C	0	74.46	10.39	12.23	23.38	18.6	5.31	6.17	15.81	37.16	94.83	6.08	22.34	49.33	9.02	18.38	12.48	50.16	19.97	6.35	5.91	14.61	8.89	8.53	22	23.06	23.88	91.39	47.55	1.7	28.32	19.83	12.45	11.51	68.89	32.31	57.07	55.88	79.87	30.21	19.28	15.16	12.85	78.14	46.46	39.86	70.86	44.06
NM_001661	ADP-ribosylation factor-like protein 4D	0	2.38	1.07	0.93	0.35	0.63	1.2	0.15	0.63	0.83	0.86	0.12	0.68	0.83	0.32	1.26	0.56	1.06	0.41	0.2	0.59	0.44	0.73	0.18	0.88	0.96	0.89	5.65	19.85	0.1	0.69	2.45	0	0.75	1.4	0.6	1.89	1.55	2.44	1.43	0.22	0.47	0.44	2.32	1.75	0.96	5.56	1.49
NM_001037174,NM_012097,NM_177985	ADP-ribosylation factor-like protein 5A isoform	0	1.88	0.83	0.35	1.29	1.02	0.17	0.45	1.15	1.76	3.85	0.26	2.34	0.19	0.79	3.49	0.86	2.5	1.04	0.54	1.24	1.56	1.15	0.11	0.5	0.61	0.43	2.05	0.44	0.22	1.62	0.94	1.56	2.44	22.43	4.2	3.7	3.46	10.37	5.79	6.83	3.5	1.82	3.57	3.07	2.35	2.21	2.56
NM_178815	ADP-ribosylation factor-like protein 5B	0	2.43	0.38	0.24	0.65	0.5	0.12	0.19	0.26	1.66	5.17	1.28	0.89	0.56	0.08	1.21	0.4	0.5	0.11	0.24	0.16	0.51	0.14	0.03	0.05	0.21	0.07	1.07	0.44	0.1	0.36	0.02	2.5	0.57	2.28	1.99	5.52	1.21	55.71	1.27	1.79	0.54	0.55	0.64	1.2	0.36	0.28	3.34
NM_177976,NM_032146	ADP-ribosylation factor-like protein 6	0	0	0.03	0	0	0	0	0	0.31	0.06	0.27	0	0.19	0.93	0	0.48	0	0	0	0	0.04	0.16	0.04	0	0	0.05	0.08	0	0	0	0.05	0.1	0	0.22	0.21	0	0.06	0.34	0.41	0.18	0.13	0.11	0.03	0.54	0	0.29	0.14	0.26
NM_138795	ADP-ribosylation factor-like protein 8A	0	36.09	23.87	22.74	53.72	26.2	14.82	6.44	11.7	42.55	29.83	10.74	22.7	30.36	9.63	45.86	30.24	21.02	11.78	16.52	13.25	19.36	30.02	8.66	30.63	35.97	30.94	78.77	140.66	3.39	19.93	19.69	43.06	21.83	20.77	24.54	67.39	26.35	181.7	55.35	52.09	21.08	31.62	24.5	35.55	12.63	27.06	37.7
NM_018184	ADP-ribosylation factor-like protein 8B	0	17.97	7.1	3.48	8.16	9.06	2.74	6.81	8.34	25.38	51.28	7.47	13.51	11.94	3.75	21.95	8.42	9.52	4.57	3.76	4.19	11.19	12.36	0.65	2.51	3.15	3.88	14.74	11.28	1.96	3.84	8.53	32.58	11.72	29.36	20.66	30.93	16.92	71.75	37.77	26.6	11.84	7.49	12.56	12.13	11.04	11.69	18.23
NM_206919	ADP-ribosylation factor-like protein 9	0	0	0.08	0.05	0.13	0	0.16	0.19	0	0	0	0	0.49	0	0.11	0.14	0	0.04	0.03	0	0.1	0.47	0.18	0	0	0.67	0	0	0	0.28	0	0	0	0.72	0	0.48	0.1	0	0	0.14	0	0	0.16	0.18	0.29	0.27	0	0.18
NM_001134758,NM_003224	ADP-ribosylation factor-related protein 1	0	6.72	9.94	11.13	18.79	13.26	9.36	3.48	2.64	1.76	6.9	5.21	10.52	17.4	7.04	20.48	9.51	13.49	6.55	7.11	10.68	12.54	10.32	8.84	18.18	20.45	15.8	50.64	36.55	5.37	5.56	14.96	29.95	10.18	5.73	3.09	1.73	19.85	17.82	15.26	8.33	3.1	3.26	16.89	15.46	7.02	21.45	11.57
NM_014142	ADP-sugar pyrophosphatase	0	9.11	14.71	22.96	11.67	18.08	20.84	2.54	16.9	4.27	13.45	1.94	20.78	13.7	9.23	34.21	19.05	22.93	7.93	8.93	12.49	19.94	15.45	6.49	8.5	21.48	17.69	45.14	24.84	2.03	10.47	18.85	27.91	23.87	53.56	8.77	5.4	27.92	26.6	50.59	35.14	10.39	7.54	27.43	18.86	34.93	34.47	24.18
NM_001151	ADP/ATP translocase 1	0	1.2	1.98	0.56	0.35	0.73	0.99	0.12	2.07	0.24	0.99	0.38	1.65	0.56	0.63	2.85	0.05	2.08	0.65	0.12	0.44	2.88	0.57	0.42	1.05	1.35	1.06	2.37	1.46	0.12	0.74	0.85	0.64	0.14	9.78	0.93	0.62	2.3	2.5	1.16	0.92	0.25	0.64	1.87	1.07	0.99	1.73	0.94
NM_001152	ADP/ATP translocase 2	0	56.23	23.86	27.04	22.79	30.32	19.51	9.11	32.53	56.05	80.74	18.25	22.99	40.08	17.45	41.75	19.4	43.67	22.01	11.52	19.39	28.04	22.09	21.96	47.85	44.38	46.21	84.8	53.46	4.43	59.7	47.49	21.73	40.83	88.58	54.92	65.86	50.9	46.61	54.82	54.58	40.26	26.76	106.46	39.6	58.39	84.14	38.9
NM_031291	ADP/ATP translocase 4	1	0	0	0	0	0	0	0.02	0	0	0	0	0	0	0	0	0.21	0	0	0	0	0	0	0	0	0	0	0	0	0	0	0	0	0	0	0	0	0	0	0	0	0	0.02	0	0	0	0	0.04
NM_173654	AER61 glycosyltransferase	0	1.28	0.31	0.09	0.59	0.24	0.06	0.22	0.46	1	2.43	0.18	0.81	0.19	0.05	1.09	0.14	0.9	0.34	0.15	0.22	0.51	0.36	0.11	0.03	0.36	0.28	0.96	0.15	0.02	0.79	0.37	0.63	0.57	1.94	1.67	3.76	1.27	3.87	2.19	3.04	1.23	0.66	1.84	1.39	0.67	0.94	0.86
NM_001166693,NM_005935	AF4/FMR2 family member 1 isoform 1	0	6.58	1.63	1.66	4.61	2.06	0.42	0.22	0.73	1.54	6.58	0.92	3.18	1.57	0.45	5.19	3.05	1.82	0.79	1.54	2.05	0.77	1.5	0.27	0.93	1.19	1.92	9.9	4.08	0.12	1.45	0.88	5.88	2.87	3.77	1.63	2.1	6.2	29.04	11.06	9.33	2.78	1.69	3.91	5.53	1.88	2.5	7.56
NM_001169124,NM_002025,NM_001169122,NM_001169123,NM_001169125,NM_001170628	AF4/FMR2 family member 2 isoform 4	1	0.12	0.03	0.01	0.04	0.04	0.11	0	0.02	0.01	0.03	0.01	0.06	0.19	0	0.05	0.16	0.03	0.02	0.03	0.06	0.02	0.25	0	0	0.02	0.02	0	0	0	0	0.04	0.22	0.14	0.11	0.03	0.02	0.03	0.06	0.09	0.04	0.03	0.03	0.03	0.1	0.04	0.11	0.18
NM_001025108,NM_002285	AF4/FMR2 family member 3 isoform 2	0	0.92	0.17	0.05	0.95	0.22	0.16	0.14	0.04	1.15	3.37	0.05	0.38	1.85	0.03	0.21	0.28	0.53	0.17	0.07	0.37	0.08	0.36	0	0.03	0.37	0.18	1.99	0.33	0.02	0.09	0.25	0.06	0.14	0.48	1.1	2.24	0.78	1.27	0.25	0.1	0.25	0.27	1.43	1.04	0.17	0.99	0.97
NM_014423	AF4/FMR2 family member 4	0	5.73	1.09	0.34	2.17	1.22	0.27	0.98	0.96	4.03	11.18	1.07	1.74	1.48	0.4	2.78	0.72	1.94	0.87	0.61	1.5	1.03	1.11	0.07	0.52	1.19	0.48	3.55	1.35	0.07	1.53	1.09	1.89	2.19	6.32	5.82	12.08	3.58	23.24	7.09	7.26	3.33	2.65	3.88	4.21	1.46	2.64	4.16
NM_006796	AFG3-like protein 2	0	8.02	4.29	2.53	5.97	5.02	3.49	1.73	3.86	5.61	17.97	2.39	4.23	8.24	2.54	11.92	1.59	7.53	3.89	2.08	2.88	5.49	4.37	1.53	3.25	5.22	5.1	9.54	7.94	1.43	4.99	7.44	7.74	7.92	15.74	9.56	7.81	10.11	12.56	9.48	6.6	4.77	4.36	15.71	8.41	7.09	16.57	6.34
NM_003977	AH receptor-interacting protein	0	50.11	44.79	64.5	93.45	74.24	54.8	19.2	32.15	69.72	81.03	28.09	49.93	140.69	42.04	98.23	46.87	73.42	34.77	33.57	49.94	64.35	53.07	51.28	108.86	120.83	82.01	289.36	252.87	32.93	49.15	94.78	73.92	67.78	57.84	63.36	85.38	95.85	85.73	105.95	51.8	37.47	36.7	104.42	101.49	58.24	141.64	63.65
NM_003488	AKAP1	0	3.32	1.68	0.62	2.84	0.97	0.51	0.16	1.02	1.2	4.96	0.45	1.37	2.5	0.55	2.86	0.42	2.25	1.01	0.42	0.85	1.76	0.96	0.38	1.14	1.05	1.42	5.65	0.63	0.18	1.38	1.78	1.54	1.04	3.44	1.38	1.72	3.12	3.74	1.65	1.91	0.94	0.96	4.27	1.88	1.71	2.64	2.19
NM_022476,NM_001012398	AKT-interacting protein	0	0.14	0.64	0.46	0.85	1.63	0.29	0.18	0.59	1.87	2.31	0.34	2.01	2.68	0.73	1.51	0.98	1.84	1.18	0.67	0.93	0.88	0.83	0.27	0.47	0.86	0.43	2.22	1.27	0	0.58	0.56	0.75	6.2	15.37	4.63	7.86	16.84	17.37	12.85	9.09	3.52	1.84	5.09	6.86	3.38	4.99	7.22
NM_004304	ALK tyrosine kinase receptor precursor	1	0	0	0.01	0	0.03	0	0	0	0	0.02	0	0.03	0	0.01	0.02	0	0.02	0.02	0	0.01	0	0.01	0	0	0.06	0.01	0	0	0	0	0	0	0	0.03	0.01	0	0	0	0	0	0	0	0.02	0	0	0	0
NM_001190707,NM_182775,NM_147129	ALS2 C-terminal-like protein isoform 1	0	0.31	0.11	0.11	0.44	0.28	0.17	0.14	0.09	0.44	0.64	0.18	0.22	2.59	0.22	0.62	0.05	0.92	0.35	0.39	0.26	0.24	0.12	0.04	0.76	0.8	0.16	2.18	0.5	0.32	0.42	0.62	0.06	0.47	0.44	0.46	0.26	1.73	0.6	0.94	0.21	0.46	0.52	0.82	1.68	0.14	2.13	1.08
NM_006982	ALX homeobox protein 1	1	0	0	0	0	0	0	0	0	0	0	0	0	0	0.04	0	0	0	0	0	0	0	0	0	0	0	0	0	0	0	0	0	0	0	0	0	0	0	0	0	0	0	0	0	0	0	0	0
NM_001171689,NM_015365,NM_001025580	AMME syndrome candidate gene 1 protein isoform	0	0.94	0.37	0.22	0.79	0.71	0.08	0.09	0.78	0.64	2.05	0.13	0.74	1.76	0.29	1.46	0.44	0.82	0.49	0.26	0.41	0.45	0.52	0.11	0.16	0.37	0.14	0.36	0.22	0.04	0.22	0.39	0.46	0.25	1.64	0.62	0.54	1.88	1.08	2.32	1.42	0.65	0.37	1.61	1.75	1.12	1.93	1.23
NM_031445	AMMECR1-like protein	0	4.94	1.77	1.1	2.78	1.65	0.65	1.04	1.23	2.01	6.52	1.99	1.24	1.94	0.85	3.02	0.54	2.6	0.97	0.74	1.56	1.64	1.75	0.21	1.23	1.86	1.68	3.49	2.33	0.28	1.15	1.09	1.43	1.76	2.69	1.97	2.35	2.46	5.93	3.82	2.06	1.06	1.32	4.04	2.62	1.38	3.18	2.83
NM_000036,NM_001172626	AMP deaminase 1 isoform 1	1	0.12	0.01	0	0	0.08	0.07	0	0	0	0	0	0.15	0	0.02	0.09	0	0.01	0.02	0	0	0.11	0.02	0	0	0.08	0	0	0	0	0	0	0	0.11	0.13	0.09	0.03	0	0.13	0	0	0	0	0	0	0	0	0
NM_139156,NM_004037,NM_203404	AMP deaminase 2 isoform 2	0	62.64	6.52	6.72	47.72	9.91	6.18	3.9	9.18	23.16	10.21	6.93	17.48	62.01	10.71	31.06	19.47	20.13	23.31	21.82	17.82	8.63	23.56	7.33	32.58	50.22	13.68	25.86	95.05	6.33	21.46	25.85	5.28	30.22	18.83	14.68	50.24	17.77	119.78	29.81	52.35	47.59	62.88	33.9	65.67	9.1	60.17	37.81
NM_001172431,NM_000480,NM_001025389,NM_001025390,NM_001172430	AMP deaminase 3 4	0	13.37	3.74	1.46	8.48	2.97	1.42	1.68	1.49	8.99	11.58	1.67	2.22	5	0.76	5.23	3.8	3.26	1.76	2.12	2.15	2.4	7.03	0.38	0.74	1.83	1.62	3.23	2.84	0.15	2.6	2.01	3.49	5.27	3.12	8.65	8.26	2.55	13.13	6.05	12.55	2.93	3.33	4.09	5.14	2.56	5.56	6.96
NM_020799	AMSH-like protease	0	1.88	3.71	1.47	0.83	4.35	1.42	0.47	2.17	2.4	5.42	0.18	5.42	12.22	1.3	4.07	1.89	5.21	1.19	1.21	2.91	4.11	3.65	0.75	1.92	2.64	1.54	13.01	2.2	0.04	1.71	1.63	12.21	0.61	3.05	1.89	1.67	3.68	6.91	6.75	3.4	1.05	0.89	6.89	3.75	3.56	2.78	5.33
NM_033364	AMY-1-associating protein expressed in testis 1	1	0.14	0.01	0	0	0	0.01	0	0	0.04	0	0	0.04	0	0.01	0	0	0	0	0	0.02	0.07	0	0	0	0	0	0	0	0	0	0	0	0	0	0	0	0	0	0.04	0	0	0.01	0	0	0	0.06	0.01
NM_174890,NM_001128324	AN1-type zinc finger and ubiquitin	0	2.72	0.96	0.56	1.28	1.15	0.33	0.16	0.3	1.15	2.83	0.18	0.62	2.5	0.15	1.39	0.72	1.26	0.6	0.38	1.34	0.55	0.6	0.13	0.41	0.59	0.65	3.06	1.18	0.06	0.4	0.36	1.65	0.57	1.2	0.93	0.3	1.58	4.09	3.02	1.76	0.59	0.57	2.02	1.88	0.92	1.73	1.35
NM_024699,NM_001170796,NM_001170797	AN1-type zinc finger protein 1 isoform a	0	2.87	1.39	0.37	1.06	2.66	0.31	0.79	2.87	5.25	10.51	0.89	4.41	4.17	1	6.05	1.24	4.15	1.85	0.73	2.03	2.85	1.88	0.84	0.86	1.16	0.83	5.05	1.5	0.18	0.85	1.71	2.37	3.01	14.56	4.72	6.32	6.01	11.19	6.26	4.98	2.87	1.81	6.56	4.34	3.14	3.29	2.6
NM_182491	AN1-type zinc finger protein 2A	0	31.68	13.44	12.64	8.97	14.78	2.61	34.2	27.34	48.11	57.26	33.79	42.4	68.86	14.01	53.92	30.08	21.31	14.18	10.09	60.09	24.92	19.6	11.55	44.54	64.36	20.8	68.67	105.65	6.12	14.5	25.5	24.18	31.58	82.48	79.26	102.24	34.19	117.37	53.94	78.35	39.24	32.99	27.84	46.29	20.68	38.55	29.39
NM_138802	AN1-type zinc finger protein 2B	0	34.09	17.6	22.03	31.45	38.2	18.33	25.26	20.03	20.03	60.36	149.67	33.49	119.86	25.79	82.86	49.2	34.38	22.27	25.62	23.75	29.62	42.05	19.11	59.32	62.91	36.05	109.47	119.7	15.13	23.62	42.29	49.42	76.74	57.21	45.6	38.34	58.6	65.79	55.89	36.59	28.31	25.01	52	65.74	23.44	78.64	46.69
NM_021943	AN1-type zinc finger protein 3	0	88.44	10.58	18.24	56.68	20.44	8.46	3.76	4.32	27.48	40.02	13.39	7.75	16.85	4.55	21.97	26.28	15.28	8.88	13.56	11.4	7.3	11.84	2.44	15.31	17.98	19.85	57.23	61.46	1.75	16.85	13.05	19.1	21.4	13.68	15.26	32.6	23.55	84.46	39.38	27.09	12.66	15.91	36.52	34.23	8.14	26.81	41.23
NM_006007,NM_001102421,NM_001102420	AN1-type zinc finger protein 5	0	25.27	2.17	1.54	15.95	5.71	1.59	3.68	7.24	14.05	28.45	9.33	4.93	8.42	3.63	23	7.81	8.98	6.51	2.55	10.99	5.48	9.75	0.37	3.66	4.27	3.51	9.73	15.16	1.19	5.51	7.06	2.94	10.65	16.73	11.89	30.66	10.02	37.98	22.19	20.19	11.19	5.82	17.34	17.44	5.31	11.06	13.3
NM_019006	AN1-type zinc finger protein 6	0	11.95	4.27	1.82	8.64	8.16	1.58	1.66	6.25	13.14	28.48	1.78	7.7	7.87	1.81	14.23	6.13	8.69	4.96	3.54	3.9	5.81	6.71	0.93	5.69	5.03	3.72	11.4	9.6	0.28	5.9	6.9	7.76	5.52	22.38	12.82	24.21	7.65	49.46	13.86	21.72	9.21	6.34	13.38	11.16	3.85	7.83	15.12
NM_020690	ANKHD1-EIF4EBP3 protein	0	12.43	5.54	6.8	14.85	6.59	4.82	5.57	2.04	8	15.9	2.14	4.06	6.76	2.13	10.64	6.74	7.25	3.41	4.06	5.73	3.88	5.27	1.63	3.41	4.88	6.51	16.34	13.13	1.18	5.36	6.09	9.41	11.43	9.7	9.09	11.01	12.65	29.61	16.74	11.32	5.99	8.31	16.99	11.29	8.52	24.34	17.49
NM_001145442	ANKRD26-like family C member ENSP00000349402	1	0	0	0	0	0	0	0	0	0	0	0	0	0	0	0	0	0	0	0	0	0	0	0	0	0	0	0	0	0	0	0	0	0	0	0	0	0	0	0	0	0	0	0	0	0	0	0
NM_001166019,NM_001127,NM_145730	AP-1 complex subunit beta-1 isoform c	0	49.31	13.2	20.59	49.37	14.33	13.39	8.11	8.34	19.78	48.59	10.61	10.17	25.55	11	33.62	14.39	20.08	12.62	12.27	22.77	15	13.91	13.37	28.38	30.88	34.63	46.12	52.58	9.44	24.26	23.41	15.79	19.14	13.37	20.19	18.79	30.18	34.88	34.26	28.82	16.69	17.3	57.49	28.86	20.84	43.35	24.26
NM_001030007,NM_001128	AP-1 complex subunit gamma-1 isoform a	0	18.31	4.08	3.68	8.66	5.41	2.45	3.17	2.87	11.21	25.04	3.55	6.55	8.33	1.52	10.32	5.11	5.4	2.05	2.51	2.93	3.08	4.31	0.57	1.12	2.33	2.68	12.36	6.78	0.3	4.68	3.54	10.41	5.38	10.34	11.62	25.87	8.35	53.04	17.14	32.71	11.87	9.54	8.53	11.39	5.53	7.91	11.62
NM_003917	AP-1 complex subunit gamma-like 2	0	22.12	20.24	28.28	36.46	28.93	19.49	17.37	10.56	16.32	28.05	24.35	28.77	74.97	22.48	49.33	37.71	32.66	21.14	22.37	41.19	27.08	32.17	22.71	47.6	53.32	35.38	113.36	99.19	17.75	20.7	32.55	59.78	44.95	37.53	33.36	26.7	65.71	41.03	64.85	40.52	34.57	27.74	57.11	64.12	31.75	110.5	48.28
NM_001130524,NM_032493	AP-1 complex subunit mu-1 isoform 1	0	29.49	19	27.32	55.09	20.82	18.79	4.43	9.73	12.71	27.33	7.18	12.8	28.14	11.41	30.28	29.06	29.23	16.11	17.9	23.48	17.67	19.8	15.27	36.44	35.63	40.95	68.58	85.56	9.77	24.98	36.34	18.59	26.78	14.96	15.58	11.09	39.2	41.53	42.66	37.23	22.2	21.22	58.21	32.97	27.33	63.63	42.22
NM_005498	AP-1 complex subunit mu-2	0	1.25	0.02	0.79	1.45	0.11	0.31	0.02	0.02	0.11	0.21	0.05	0.38	3.05	0.11	1.6	0	1.11	0.48	0.82	0.87	0.1	0.37	0.22	1.19	1.06	0.52	0.49	5.28	0.18	0.96	0.63	1.36	2.22	1.1	1.16	0.49	2	0.95	2.15	0.36	0.49	1.18	0.44	0	0.19	0.94	1.23
NM_001283	AP-1 complex subunit sigma-1A	0	6.29	11.69	14.23	11.61	15.24	8.38	3.36	16.57	1.02	7.39	2.81	17.42	27.95	12.64	47.16	10.87	18.86	8.92	6.85	9.25	28.92	21.05	12.55	23.56	28.96	18.06	62.34	52.61	12.33	12.2	34.56	16.79	17.56	51.89	5.34	1.85	27.17	24.89	36	27.37	13.88	9.3	22.4	19.83	24.31	22.33	9.51
NM_003916	AP-1 complex subunit sigma-2	0	10.31	4.34	4.72	12.36	17.03	3.67	5.49	4.71	7.88	11.07	5.76	14.52	23.69	7	37.05	22.53	19.61	13.49	8.05	6.49	11.27	15.94	0.7	5.01	6.22	2.93	24.67	12.82	2.4	6.05	9.33	33.58	49.32	68.89	16.29	13.27	65.64	45.43	51.53	38.3	18.67	8.34	19.69	37.5	10.37	37.25	40.93
NM_001039569	AP-1 complex subunit sigma-3	0	0.39	0.18	0.23	0.06	0.15	0.15	0.05	0.2	0.53	3.42	0	0.19	0.19	0.01	0.3	0.14	0.25	0.05	0.01	0.17	0.06	0.07	0	0	0.11	0.04	0.81	0.04	0.01	0.16	0.16	0.11	0.07	1.41	1.11	1.26	0.79	1.46	1.07	0.51	0.35	0.24	0.54	0.42	0.3	0.26	0.42
NM_018569,NM_001128426	AP-1 complex-associated regulatory protein	0	2.05	0.57	0.15	0.8	0.83	0.11	0.1	0.92	1.76	2.73	0.35	0.88	0.65	0.27	2.95	0.3	1.53	0.81	0.37	1.06	0.62	0.8	0.07	1.07	0.32	0.62	3.12	0.92	0.17	0.47	0.64	0.97	2.26	3.63	1.23	3.77	6.22	12.9	5.63	4.34	1.27	0.59	2.73	2.14	1.03	1.7	4.26
NM_014203,NM_130787	AP-2 complex subunit alpha-1 isoform 1	0	173.21	15.77	17.03	77.24	52.89	14.31	10.44	8.62	24.56	61.19	35.85	14.98	107.27	13.68	36.43	74.13	21.06	19.13	20.96	20.22	15.29	20.82	13.69	59.05	35.42	41.87	58.49	87.39	9.04	24.3	30.08	22.05	42.44	11.81	10.05	14.37	28.47	35.73	32.69	20.83	17.89	17.18	98.49	92.33	12.09	57.53	31.95
NM_012305	AP-2 complex subunit alpha-2	0	5.16	5.65	7.04	15.22	5.99	5.42	1.79	2.24	2.21	6.23	1.72	4.48	10.27	4.37	13.7	7.67	7.34	4.44	4.02	9.13	6.33	5.39	3.83	8.95	9.8	11	23.17	17.43	2.91	5.88	7.97	6.56	7.71	5.15	4.06	2.63	11.89	11.07	12.51	10.36	5.03	4.75	16.65	11.74	7.73	17.08	11.93
NM_001282,NM_001030006	AP-2 complex subunit beta isoform b	0	51.58	12.98	17.63	18.8	14.9	12.01	3.05	5.9	4.9	21.18	5.1	17.21	29.25	8.38	33.19	23.37	17.82	7.57	7.07	7.74	12.9	14.38	5.25	15.16	16.41	16.67	40.54	31.93	3.24	7.39	22.15	46.45	30.97	40.87	13.02	3.5	29.96	29.87	41.56	23.01	12.43	8.36	48.12	34.78	25.75	51.49	21.68
NM_001025205,NM_004068	AP-2 complex subunit mu isoform b	0	425.15	63.63	100.6	169.16	116.93	85.03	66.18	46.14	74.4	191.84	109.58	68.88	373.37	55.42	177.09	211.57	101.28	53.84	64.68	89.35	74.94	69.96	56.28	212.33	141.82	152.91	238.55	253.63	46.94	94.53	124.77	109.35	300.16	132.84	109.58	80.36	235.8	232.02	211.26	165.14	105.48	106.39	386.15	315.39	161.35	429.19	159.33
NM_021575,NM_004069	AP-2 complex subunit sigma isoform AP17delta	0	311.97	41.59	75.96	150	118.38	57.13	94.83	51.05	59.79	127.14	170.41	60.56	290.26	63.74	184.37	147.17	79.6	46.98	54.64	74.7	83.87	80.29	59.2	220.7	141.41	103.02	254.19	240.22	91.46	78	132.21	93	179.54	90.07	74.63	70.05	135.44	105.67	134.8	90.77	65.06	70.68	170.12	211.38	76.94	232.51	69.13
NM_003664	AP-3 complex subunit beta-1	0	5.9	4.41	3.69	8.8	5.61	2.85	0.66	4.66	3.22	10.27	0.92	7.35	7.77	3.31	13.18	5.97	7.07	3.34	2.68	1.96	4.84	6.75	0.87	1.92	3.47	4.49	8.26	6.96	0.55	4.15	7.95	8.9	9	18.97	5.21	1.95	10.64	14.81	18.81	12.24	5.34	3.69	13.43	9.51	9.01	11.94	9.56
NM_004644	AP-3 complex subunit beta-2	0	0.26	0.46	0.17	0.03	0.06	0.31	0.01	0.07	0	0	0.08	0.27	0	0.01	0.18	0.14	0.06	0	0.18	0.1	0.15	0.31	0.04	0.14	0.02	0.34	0	0.46	0.13	0	0.04	0.39	0.07	0.04	0	0.13	0.03	0.16	0.24	0.31	0.07	0.03	0	0	0.04	0.06	0.01
NM_001077523,NM_003938	AP-3 complex subunit delta-1 isoform 1	0	29.44	13.72	17.67	40.1	13.22	12.32	2.46	4.8	10.82	27.32	4.52	7.24	16.01	7.53	24.19	14.5	16.77	9.66	8.07	19.85	11.74	9.82	6.23	14.55	19.5	25.4	46.44	33.68	3.1	13.57	13.8	14.31	11.18	10.44	6.74	9.06	19.94	34.37	25.45	18.41	8.18	11.72	48.66	24.68	16.31	27.35	27.62
NM_207012,NM_012095	AP-3 complex subunit mu-1	0	2.91	3.34	2.98	5.12	5.06	2.34	0.75	2.81	1.87	9.56	1.03	5.42	3.89	2.81	14.66	4.64	6.42	2.83	1.95	1.23	5.2	5.05	0.97	0.99	2.62	2.17	11.96	3.64	0.44	1.95	6.05	8.83	7.28	16.36	4.05	0.93	9.75	7.93	12.9	5.68	3.79	3.3	11.55	8.18	7.44	10.41	8.26
NM_001134296,NM_006803	AP-3 complex subunit mu-2	0	3.59	1.56	1.55	0.84	0.94	0.72	0.25	0.75	2.72	6.74	0.25	1.64	7.22	0.51	2.01	0.26	2.13	1.1	0.58	0.78	1.49	0.82	0.3	0.28	1.67	0.77	5.67	1.48	0.13	1.47	1.36	2.06	1.79	4.61	7.01	2.43	3.65	7.8	2.5	3.89	2.61	3.73	2.45	5.5	3.11	4.71	4.69
NM_001284	AP-3 complex subunit sigma-1	0	6.09	2.56	1.23	3.78	3.76	1.58	1.13	3.55	4.6	8.7	1.59	6.99	3.61	1.4	6.76	5.46	3.92	2.41	1.83	2.79	3.31	5.2	0.68	3.37	3.19	2.62	10.14	5.82	0.3	3.74	3.07	8.64	6.99	21.68	11.65	12.03	7.71	21.65	19.93	21.59	7.01	5.22	7.95	8.35	5.66	6.21	6.25
NM_005829	AP-3 complex subunit sigma-2	0	2.91	3.39	4.23	8.22	5.37	3.73	1.82	1.37	2.2	5.29	1.42	3.05	5.09	2.67	9.87	5.29	4.87	3.02	2.69	3.15	4.3	8.39	1.67	3.77	4.64	4.73	12.81	12.76	1.67	2.85	7.07	8.29	6.95	8.11	3.77	3.03	7.63	8.75	8.18	6.19	4.77	2.13	8.63	7.28	6.11	13.53	8.23
NM_006594	AP-4 complex subunit beta-1	0	9.2	7.45	6.14	9.22	6.32	5.4	1.75	3.3	3.74	12.97	1.69	8.73	15.92	4.07	12.7	7.84	11.42	4.77	2.93	7.71	7.38	7.2	2.32	4.75	6.67	6.18	19.81	7.11	1.27	3.83	6.03	6.77	6.49	9.2	6.23	5.19	10.94	12.78	12.25	8.68	7.56	5.18	15.43	10.16	10.63	16.94	7.98
NM_007347	AP-4 complex subunit epsilon-1	0	0.84	0.55	0.28	1.52	0.76	0.22	0.11	0.4	0.63	2.18	0.14	0.64	1.2	0.18	1.76	0.96	1.01	0.47	0.27	0.45	0.58	0.97	0.11	0.47	0.6	0.49	1.03	0.37	0.13	0.63	0.96	0.68	0.72	2.09	1.38	0.76	2.16	2.47	2.59	1.34	0.79	0.65	2.28	1.04	1	1.73	1.27
NM_004722	AP-4 complex subunit mu-1	0	2.53	2	2.76	4.68	3.77	2.11	1.25	1.33	1.81	3.07	1.2	2.81	6.02	3.26	6.28	2.52	3.05	2.63	1.09	2.85	3.53	3.37	2.35	2.23	3.76	4.5	5.63	4.6	1.64	2.86	3.49	1.65	2.58	3.74	1.51	1.43	3.74	3.11	4.38	2.73	2.32	1.64	6.71	4.53	2.77	9.13	3.32
NM_007077,NM_001128126	AP-4 complex subunit sigma-1 isoform 1	0	1.06	0.82	0.3	0.37	0.45	0.22	0.09	0.27	1.45	1.54	0.11	0.69	0.74	0.19	1.12	0.7	1.29	0.47	0.18	0.4	0.83	0.76	0.04	0	0.69	0.57	2.4	1.57	0.15	0.4	0.97	0.94	1.18	2.5	1.21	0.67	1.24	3.39	1.12	1.1	0.44	0.41	1.89	1.97	0.77	1.05	0.84
NM_014911	AP2-associated protein kinase 1	0	1.9	0.72	0.58	1.1	0.86	0.48	1.4	0.42	1.16	2.32	0.45	0.98	2.04	0.3	1.99	0.7	1.03	0.51	0.38	0.82	0.57	0.56	0.2	0.64	0.94	0.82	2.1	0.7	0.27	0.69	0.76	1.84	1.25	2.7	1.68	2.29	2.55	4.34	3.53	2.65	1.08	0.95	2.45	2.49	1.55	3.91	1.93
NM_178339,NM_178342	AP20 region protein 1 isoform B	0	1.95	0.04	0.04	0	0	0	0.27	0.35	3.95	0.91	0.32	0.44	2.22	0.08	0.2	0	0.11	0.24	0.12	0.07	0.22	0.28	0	0.29	0.57	0.23	0	0.52	0	0.22	0.08	0.13	0.5	2.34	1.48	3.23	0.85	2.79	0.63	1.86	0.59	0.39	0.51	0.42	0.35	0.45	0.37
NM_014576,NM_138933,NM_138932	APOBEC1 complementation factor isoform 1	1	0	0	0	0	0	0	0	0	0	0	0	0	0	0	0	0	0	0	0	0	0	0	0	0	0	0	0	0	0	0	0	0	0	0	0	0	0	0	0	0	0	0	0	0	0	0	0
NM_014030,NM_001085454	ARF GTPase-activating protein GIT1 isoform 2	0	10	6.35	7.16	24.88	7.5	4.21	1.33	3.91	5.25	11.96	2.11	4.04	12.77	5.04	16.13	7.58	11.71	8.91	4.65	6.79	6.95	6.47	5.82	13.1	12.02	14	33.82	29.53	1.78	9.01	11.85	3.4	6.38	6.99	6.59	8.76	13.12	12.84	12.07	7.16	4.72	6.96	21.58	15.72	7.49	17.96	10.6
NM_057170,NM_001135213,NM_057169,NM_014776,NM_001135214,NM_139201	ARF GTPase-activating protein GIT2 isoform 2	0	10.48	8.71	12.04	24.71	12.87	7.97	1.49	3.74	7.34	10.76	0.78	11.46	16.29	4.72	22.34	13.9	13.97	7.12	9.1	8.97	7.36	14.13	3.14	5.84	11.37	12.26	50.76	29.9	1.04	9.1	10.85	25.63	20.72	16.98	9.04	10.99	18.63	41.15	39.06	25.97	11.58	11.16	22.65	19.54	12.38	26.04	26.81
NM_001029882	AT-hook DNA-binding motif-containing protein 1	0	1.71	0.66	0.68	2.87	0.91	0.37	0.13	0.09	0.98	2.02	0.08	0.32	1.02	0.24	0.94	0.56	1.42	0.63	0.25	0.72	0.29	0.32	0.22	1.12	0.73	1.83	2.59	1.53	0.13	0.5	0.57	0.04	0.5	0.3	1.26	4.47	1.12	1.24	0.92	0.39	0.14	0.33	3.55	1.33	0.45	1.39	0.98
NM_030767	AT-hook-containing transcription factor	0	63.33	26.94	37.97	131.44	33.64	17.11	3.73	4.88	27.34	57.42	7.29	16.29	39.8	11.78	32.82	25.91	46.66	22.76	25.01	23.53	13.54	20.83	15.21	34.41	46.41	51.2	121.19	114.44	3.86	25.93	24.91	21.24	36.31	21.9	24.03	10.58	41.67	60.56	50.32	20.31	15.47	23.18	88.86	53.48	21.58	84.91	60.22
NM_032199	AT-rich interactive domain-containing protein	0	8.96	2.38	1.29	2.56	1.65	0.72	0.78	1.82	7.08	11.7	1.07	3.26	2.59	0.94	3.95	1.52	2.68	1.66	0.99	2.48	1.83	1.64	0.5	1.95	2.14	1.78	8.09	3.32	0.13	1.74	1.95	3.27	1.94	10	4.14	10.33	4.62	19.5	7.55	3.38	2.2	2.19	8.36	7.51	5.27	7.43	6.72
NM_006465	AT-rich interactive domain-containing protein	0	1.64	0.84	1.21	2.14	0.95	0.65	0.2	0.34	0.71	1.14	0.22	1.3	1.67	0.42	1.49	0.93	1.32	0.8	0.75	0.9	0.68	0.93	0.52	1.35	1.75	1.28	2.57	2.55	0.07	0.9	0.57	1.45	0.93	1.93	1.95	1.15	1.7	2.92	1.77	2.4	1.16	1.75	1.59	1.78	0.76	1.56	1.85
NM_005224	AT-rich interactive domain-containing protein	0	5.59	7.6	8.69	20.16	6.63	5	1.34	2.56	2.38	5.02	0.97	4.17	2.31	3.24	11.76	12.97	4.61	3.07	4.6	5.95	7.45	5.6	3.55	8	9.86	8.6	19.25	31.91	1.65	4.04	5.25	11.16	5.66	6.42	1.41	5.47	5.92	16.87	11.15	6.49	2.21	3.35	6.66	6.34	2.14	6.1	15.82
NM_212481	AT-rich interactive domain-containing protein	0	99.49	45.59	56.32	70.38	42.94	15.81	31.44	13.35	200.99	364.9	42.05	61.91	109.68	14.77	65	101.04	24.74	13.9	24.94	45.21	25.22	41	40.49	61.93	43.41	57.26	200.04	285.69	7.97	67.93	30.09	264.39	56.74	43.77	164.71	236.5	61.54	681.04	68.33	175.08	38.56	99.61	42.33	92.46	13.56	57.73	117.88
NM_001017363	AT-rich interactive domain-containing protein	1	0	0	0	0	0	0	0	0	0	0	0	0	0	0	0	0	0.05	0	0	0.02	0	0.16	0	0	0	0.08	0	0	0	0	0	0	0	0	0	0	0	0	0	0	0	0	0	0	0.03	0	0
NM_139135,NM_006015	AT-rich interactive domain-containing protein 1A	0	13.97	3.31	2.94	19.54	4.6	2.02	0.48	1.74	3.7	12.64	0.72	2.86	6.2	1.03	7.79	3.54	5.62	2.9	1.83	3.42	2.53	4.28	0.77	2.23	2.81	6.04	14.76	7.02	0.42	2.78	3.19	4.38	4.91	7.45	2.74	6.53	7.5	11	9.79	4.09	2.3	2.48	14.15	7.76	4.41	10.16	9.18
NM_017519,NM_020732	AT-rich interactive domain-containing protein 1B	0	8.43	1.45	1.11	6.35	2.47	0.81	0.29	0.81	2.44	8.13	0.94	1.05	1.85	0.45	2.79	1.59	2.72	1.05	0.76	1.83	0.97	1.28	0.38	1.12	1.3	2.24	7.92	3.51	0.16	1.38	1.32	2.08	1.68	4.09	2.45	4.71	3.04	7.1	5.16	2.61	1.43	1.19	7.4	3.85	1.78	3.77	4.44
NM_152641	AT-rich interactive domain-containing protein 2	0	2.67	0.74	0.21	1.8	0.93	0.22	0.37	0.94	4.22	5.31	0.42	1.91	3.15	0.31	2.31	0.51	1.48	0.64	0.3	0.58	0.94	1.15	0.14	0.22	0.49	0.49	1.45	0.41	0.11	0.6	0.66	2.52	1.51	3.62	2.82	4.84	2.67	5.77	3.13	3.49	1.48	0.92	2.76	3.11	1.5	2.35	2.62
NM_023001,NM_002892,NM_023000	AT-rich interactive domain-containing protein 4A	0	2.72	1.23	0.38	2.66	1.33	0.31	0.39	0.92	4.13	5.44	0.22	1.87	1.94	0.53	3.58	1.63	2.6	1.2	1.12	1.08	0.95	2.43	0.1	0.41	0.6	0.52	2.05	1.42	0.11	1.58	0.93	3.4	4.91	7	3.24	7.6	5.63	22.86	7.71	6.89	2.32	2.99	4.47	5.37	1.38	4.23	4.92
NM_031371,NM_016374	AT-rich interactive domain-containing protein 4B	0	6.6	1.65	0.48	3.55	3.32	0.53	0.78	1.63	8.11	33.34	0.69	3.68	2.96	0.57	4.54	1.66	3.81	1.69	1.32	2.04	1.18	2.69	0.06	0.71	1.19	0.87	9.16	3.53	0.11	2.22	0.98	8.49	5.13	5.75	7.37	17.2	9.02	68.86	13.48	13.94	3.79	3.76	9.32	8.15	2.28	5.65	10.99
NM_015251	ATM interactor	0	4.38	1.29	0.63	2.84	1.16	0.6	0.38	1.55	1.56	7.52	0.42	2.49	4.17	0.93	3.97	0.96	3.06	1.45	0.58	1.2	1.94	1.59	0.28	0.43	1.36	0.88	5.8	2.16	0.15	1.56	1.58	1.6	1.65	8.73	1.97	1.81	3.59	6.06	3.64	4.96	2.44	1.37	5	4.37	2.33	4.74	2.11
NM_005176,NM_001002031	ATP synthase lipid-binding protein,	0	68.44	38.34	52.89	60.96	67.74	51.65	31.94	43.57	65.47	90.44	46.2	52.76	118.47	36.6	102.91	45.15	83.91	41.82	26.51	54.6	65.71	56.12	42.77	79.22	104.95	58.97	236.2	115.92	25.44	60.02	86.51	52.88	72.05	121.26	66.08	50.52	73.18	51.24	73.95	45.71	52.39	42.55	109.43	78.52	77.98	170.69	48.24
NM_001002027,NM_005175	ATP synthase lipid-binding protein,	0	10.21	17.4	16.91	15.8	15.64	26.32	21.64	22.68	4.68	12.75	20.42	36.98	35.82	14.41	59.58	14.01	24.41	12.24	8.13	13.49	49.03	20.21	15.18	26.95	38.62	24.92	57.44	29.62	13.13	14.67	33.91	42.6	23.69	79.53	12.84	5.84	22.45	9.42	18.95	15.82	11.44	10.89	22.53	17.83	25.1	39.52	9.18
NM_001689,NM_001002258,NM_001190329	ATP synthase lipid-binding protein,	0	20.57	12.85	13.12	16.7	20.99	12.26	6.96	21.58	13.23	36.98	8.33	23.5	21.84	13.07	52.92	14.29	26.96	12.93	7.03	10.77	29.49	17.48	10.5	13.22	19.77	15.08	37.93	23.1	2.86	16.17	28.41	26.94	26.81	107.38	24.2	14.98	35.87	37.29	43.71	31.09	18.56	17.21	41.78	30.31	39.87	42.27	20.14
NM_022745,NM_001042546	ATP synthase mitochondrial F1 complex assembly	0	3.18	3.66	2.26	2.57	2.83	2.04	0.82	3.88	1.16	4.1	0.79	5.32	7.31	1.7	8.59	2.1	6.09	2.57	1.27	3.08	5.88	4.19	0.93	2.23	3.36	2.44	9.18	3.53	0.33	4.02	4.45	5.44	2.47	15.5	1.97	1.34	6.69	8.34	8.78	7.96	3.37	2.01	8	6.34	5.49	7.21	3.3
NM_145691	ATP synthase mitochondrial F1 complex assembly	0	6.05	5.21	6.02	8.34	5.45	5.58	4	3.61	3.54	9.78	5.65	3.15	17.86	5.04	13.73	7.79	6.74	3.97	4.06	6.76	6.99	5.7	4.25	8.05	13.45	8.24	18.27	12.08	3.3	6.92	14.03	5.48	9.07	9.09	10.66	3.91	11.94	9.61	11.35	12.27	6.53	5.74	9.45	9.48	6.13	18.64	7.49
NM_001697	ATP synthase subunit O, mitochondrial precursor	0	65.41	45.69	34.52	22.26	92.35	27.78	86.47	118.01	91.62	161.28	56.66	152.57	274.24	64.32	246.08	83.6	105.13	60.79	37.17	50.17	138.3	101.12	32.33	75.23	86.43	41.26	173.62	98.69	18.84	44.47	89.49	174.22	86.6	360.52	117.35	95.92	103.41	85.99	136.07	116.23	64.91	50.4	115.2	94.53	91.52	125.73	49.59
NM_004046,NM_001001937	ATP synthase subunit alpha, mitochondrial	0	60.59	38.9	44.13	48.57	48.9	48.18	11.02	35.25	45.93	101.05	16.74	38.92	68.49	28.91	102.66	36.26	63.41	36.33	24.01	20.02	59.49	42.27	19.4	31.41	48.26	46.34	119.31	48.66	5.09	48.84	72.37	45.97	63.7	159.44	49.26	29.41	89.31	76.28	103.26	55.55	36.77	39.4	128.74	68.13	107.17	134.15	55.97
NM_001688	ATP synthase subunit b, mitochondrial precursor	0	9.25	7.61	5.84	8.49	17.09	4.19	2.34	15.16	8.19	22.36	2.45	13.67	25.45	8.54	36.24	11.43	16.69	10.17	7.15	5.23	16.61	15.83	4.15	6.69	11.6	7.81	38.96	12.89	0.98	10.75	18.04	11.27	10.83	30.13	7.14	3.75	15.44	14.2	19.53	15.79	10	6.87	17.77	14.14	11.31	14.58	11.78
NM_001686	ATP synthase subunit beta, mitochondrial	0	259.77	131.07	180.62	187.75	158.67	156.46	70.28	118.97	143	368.56	91.2	142.29	297.48	99.29	326.4	186.6	203.84	99.44	86.07	85.96	193.44	147.58	62.7	136.85	170.71	172.78	383.44	247.9	38.07	145.28	239.92	184.22	345.9	450.68	198.53	180.23	355.44	328.53	410.53	244.26	155.51	145.06	421.68	272.56	331.38	472.68	206.58
NM_006356,NM_001003785	ATP synthase subunit d, mitochondrial isoform a	0	26.69	13.92	17.11	10.31	17.17	24.3	8.29	20.63	9.82	20.42	10.95	29.44	37.12	15.16	51.11	18.56	24.78	12.78	9.45	14.02	26.29	23.19	8.54	14.5	17.77	16.91	74.51	25.89	5.68	12.71	26.42	42.58	40.9	63.25	17.62	16.77	34.49	38.59	54.99	33.77	20.69	18.33	31.68	28.89	36.98	52.79	19.82
NM_001687,NM_001001975	ATP synthase subunit delta, mitochondrial	0	101.11	36.35	47.52	88.26	82.41	44.01	112.07	43.65	73.69	95.83	158.52	72.01	213.9	51.77	125.32	71.26	83.18	46.09	34.05	55	74.41	49.09	89.59	182.24	129.42	110.15	226.93	165.37	80.64	74.23	93.59	96.04	32.48	26.85	46.56	52.51	73.23	37.7	50.42	33.32	11.2	28.2	82.15	77.26	15.38	65.62	32.25
NM_007100	ATP synthase subunit e, mitochondrial	0	185.09	82.29	41.07	33.12	207.55	41.43	165.89	174.03	134.52	204.83	131.2	312.27	441.77	132.32	334.01	149.69	134.99	84.9	54.9	102.68	290.37	212.73	139.3	306.99	304.63	145.16	500.78	287.87	60.73	59.16	131.44	492.5	106.06	411.1	181.19	139.79	137.39	209.13	153.05	177.75	66.07	54.61	181.76	141.21	69.51	144.93	74.43
NM_001001977,NM_006886	ATP synthase subunit epsilon, mitochondrial	0	1344.38	132.67	121.41	82.57	664.19	124.63	289.62	207.44	548.26	1167.47	483.42	483.44	5406.3	177.78	972.05	1211.06	251.23	179.64	247.55	254.33	519.27	577.86	120.42	896.5	441.35	272.52	1187.06	448.49	108.11	125.33	281	1277.03	968.8	1135.42	518.99	564.46	494.53	1067.27	821.73	894.45	302.31	155.99	1057.67	1345.63	272.38	588.19	420.25
NM_004889,NM_001003714,NM_001003713,NM_001039178,NM_001190354,NM_001190353	ATP synthase subunit f, mitochondrial isoform	0	47.94	29.37	37.82	27.49	72	36.44	51.96	39.83	27.74	75.61	37.03	71.93	151.24	38.32	156.65	68.72	46.66	25.58	19.49	40.63	97.97	70.71	37.84	70.42	83.7	47.59	148.64	99.83	31.88	32.61	90.75	151.29	143.45	259.79	78.11	33.71	112.13	113.16	118.55	123.79	62.21	40.11	93.92	80.36	98.13	152.76	44.14
NM_001165877	ATP synthase subunit g 2, mitochondrial	1	0	0	0	0	0	0	0.15	0	0	0	0	0	0.83	0	0	0	0.04	0	0	0	0	0	0	0	0	0	0	0	0	0	0	0	0	0	0	0	0	0	0	0	0	0	0	0	0	0	0
NM_006476	ATP synthase subunit g, mitochondrial	0	94.7	42.17	35.91	33.25	119.04	28.99	30.55	79.66	108.62	161.44	48.21	115.79	282.48	46.27	173.44	91.5	70.4	39.89	30.38	49.79	111.62	82.79	48.41	108.1	98.16	72.6	294.3	138.74	11.14	47.12	87.13	177.07	72.3	223.18	77.75	79.51	71.15	161.1	98.95	97.18	50.56	34.59	99.66	92.01	59.86	87.66	53.11
NM_001001973,NM_005174	ATP synthase subunit gamma, mitochondrial	0	20.09	23.7	17.26	12.52	32.02	16.58	9.51	52.24	32.27	70.6	11.06	67.06	67.66	29	132.69	36.59	52.57	26.54	17.41	23.84	67.4	53.95	10.96	23.3	32.33	23.41	54.38	43.53	4.33	23.98	62.4	72.89	58.07	280.88	52.07	49.7	91.5	99.75	122.55	93.84	42.17	26.26	74.73	80.17	62.99	60.91	37.06
NM_001003803,NM_001003805,NM_015684	ATP synthase subunit s, mitochondrial isoform a	0	4.07	1.05	0.35	1.32	1.09	0.4	1.2	0.67	2.45	9.73	1.82	2.17	6.76	0.94	3.63	1.56	1.86	1.19	0.81	0.62	1.72	1.61	0.4	1.31	1.01	0.65	1.3	2.46	0.19	1.75	2.07	1.67	2.44	7.49	5.65	2.92	2.22	7.2	2.73	5.34	1.89	1.56	3.4	3.91	1.47	3.12	2.13
NM_001167869,NM_001167867,NM_001167870,NM_001167871,NM_001167868,NM_018035	ATP synthase subunit s-like protein isoform 3	0	14.33	10.72	13.35	19.49	13.99	9.84	6.78	12.51	11.8	33.17	9.59	9.9	18.6	10.47	31.74	10.49	18.71	10.1	7.39	10.43	16.8	13.79	9.64	21.66	23.36	18.78	67.07	37.1	6.09	12.96	20.59	17.23	13.51	27.33	17.2	10.05	24.95	27.27	29.61	24.57	12.7	10.6	27.43	21.97	17.52	29.45	15.9
NM_001003697,NM_001685,NM_001003696,NM_001003701,NM_001003703	ATP synthase-coupling factor 6, mitochondrial	0	21.78	10.33	5.62	5.73	17.58	7.84	6.44	25.6	8.54	34.6	6.77	33.12	31.56	12.97	54.43	17.42	22.72	10.13	6.48	12.42	36.94	22.59	3.62	10.99	16.64	8.79	47.17	14.85	2.1	8.69	15.1	38.72	20.32	109.02	22.54	15.58	26.92	41.95	41.27	42.79	16.78	12.89	27.13	24.65	20.8	30.58	15.52
NM_005502	ATP-binding cassette sub-family A member 1	0	14.02	0.75	0.83	5.88	0.36	0.16	2.75	3.04	6.04	20.58	2.05	5.19	1.11	0.63	2.9	1.24	1.91	0.95	1.55	1.25	0.38	0.73	0.02	0.1	1.1	0.64	3.27	2.25	0.14	3.04	1.38	3.49	3.66	6.32	9.21	42.23	2.19	57.48	14.33	23.08	10.91	4.31	3.98	5.56	1.39	1.39	4.31
NM_080282	ATP-binding cassette sub-family A member 10	1	0	0	0.01	0	0	0.02	0.01	0	0	0.02	0	0	0	0	0	0	0.01	0.01	0	0.04	0.01	0	0	0	0.02	0	0	0	0	0	0.04	0	0	0.08	0.04	0.03	0.15	0.03	0.04	0	0.02	0.01	0.05	0.03	0.01	0.03	0.07
NM_173076,NM_015657	ATP-binding cassette sub-family A member 12	1	0	0	0	0	0	0	0.03	0	0	0	0.04	0.01	0.19	0	0	0.02	0	0.01	0	0.01	0	0	0	0	0	0	0	0	0	0	0.03	0	0	0	0	0	0	0	0	0.01	0	0	0	0	0	0	0.01
NM_152701	ATP-binding cassette sub-family A member 13	0	0.43	0.01	0	0	0.04	0.04	0.01	0.01	0.16	0.08	0.01	0.2	0.65	0	0.05	0.14	0.06	0.03	0.05	0.16	0.06	0.6	0	0.07	0.02	0.02	0	0.02	0	0	0	0.35	0.07	0.13	0.08	0.05	0.07	0.22	0.2	0.07	0.02	0.01	0.03	0.16	0.04	0.03	0.08
NM_001606,NM_212533	ATP-binding cassette sub-family A member 2	0	17.83	4.35	5.94	12.13	8.27	2.24	1.6	3.14	3.87	8.17	4.47	4.81	10.83	3.3	8.41	12.17	7.53	4.45	4.82	10.54	3.52	6.37	5.21	9.16	11.4	12.26	12.58	22.29	0.65	8.4	4.1	5.98	4.01	3	4.98	5.31	6.39	20.01	9.7	13	3.3	5.51	27.67	12.75	2.23	5.59	9.75
NM_001089	ATP-binding cassette sub-family A member 3	0	1.28	0.4	0.33	0.63	0.13	0.17	0.09	0.03	0.01	0.19	0.05	0.19	1.48	0.27	0.43	0.3	0.36	0.32	0.2	0.47	0.29	0.19	0.23	0.66	0.63	0.55	0.81	1.37	0.16	0.32	0.56	0.29	0.54	0.59	0.31	0.09	0.76	0.67	0.36	0.45	0.2	0.26	1.15	1	0.25	1.62	0.54
NM_018672,NM_172232	ATP-binding cassette sub-family A member 5	0	0.72	0.21	0.03	0.08	0.13	0.03	0.09	0.25	0.4	0.76	0.12	0.56	0.65	0.12	0.5	0.26	0.37	0.31	0.07	0.19	0.27	0.38	0.01	0.07	0.08	0.03	0.39	0	0.01	0.29	0.14	0.92	0.29	0.66	0.36	0.39	0.85	1.65	0.58	1.03	0.3	0.22	0.77	0.74	0.23	0.45	1.19
NM_080284	ATP-binding cassette sub-family A member 6	1	0	0.01	0.02	0.02	0.04	0	0	0	0.05	0.05	0.07	0.02	0	0.03	0.02	0	0.02	0.03	0.01	0.01	0.02	0.04	0.01	0	0	0.04	0	0	0	0	0.01	0	0	0.2	0.02	0.03	0.06	0.06	0.05	0	0.01	0.01	0	0	0.02	0	0.03
NM_019112	ATP-binding cassette sub-family A member 7	0	13.3	9.89	26.86	23.61	35.7	13.98	5.75	3.12	4.76	7.85	7.96	11.05	25.08	11.33	31.86	35.96	21.97	10.72	16.45	42.1	12.44	33.56	10.94	34.62	59.86	24.58	126.6	71.6	7.77	12.44	11.8	52.26	23.48	8.45	6.04	11.15	28.04	26.03	40.9	14.61	8.2	8.75	15.45	38.92	5.89	32.03	55.8
NM_007168	ATP-binding cassette sub-family A member 8	1	0	0	0	0	0	0	0	0	0	0	0	0	0	0.02	0	0.02	0.01	0	0	0.02	0	0	0	0	0	0	0	0	0	0	0	0	0	0	0	0	0	0	0	0	0	0	0	0	0	0	0
NM_080283	ATP-binding cassette sub-family A member 9	1	0	0.01	0.01	0	0	0	0	0	0	0	0	0.01	0.19	0	0	0.05	0	0	0	0.01	0	0	0	0	0	0	0	0	0	0	0.03	0	0	0	0	0	0	0	0	0	0	0	0	0	0	0	0.03
NM_012089	ATP-binding cassette sub-family B member 10,	0	3.25	0.37	0.05	1.09	0.63	0.07	0.1	0.49	0.27	2.16	0.29	0.68	0.56	0.3	0.98	0.42	0.99	0.76	0.09	0.46	0.38	0.22	0.02	0.05	0.1	0.36	0.32	0.24	0.02	1	0.39	0.06	1.33	4.23	0.72	1.02	2.15	2.85	1.95	2.42	0.83	0.56	3.34	2.46	1.09	1.39	0.93
NM_001163941,NM_001163942,NM_178559,NM_001163993	ATP-binding cassette sub-family B member 5	0	0.05	0	0	0	0	0	0	0	0	0	0	0	0.09	0	0	0.02	0.01	0	0	0.01	0	0	0	0	0	0	0	0	0	0	0	0	0	0	0	0	0	0	0.02	0	0	0	0.03	0	0.01	0	0
NM_005689	ATP-binding cassette sub-family B member 6,	0	6.87	1.5	2.54	1.67	2.03	2.41	0.56	0.49	0.59	7.95	4.46	1.51	3.98	0.8	3.61	1.63	1.51	0.62	0.94	1.54	2.61	1.96	1.04	1.52	3.34	3.43	4.66	3.05	0.46	0.52	1.24	3.18	2.01	4.39	0.61	1.44	3.61	1.93	3.73	1.45	0.58	0.42	3.19	2.43	1.85	3.12	2.25
NM_004299	ATP-binding cassette sub-family B member 7,	0	4.22	2.49	1.4	3.71	2.71	1.56	1.32	3.41	4.6	9.81	1.76	4.33	8.33	1.73	5.99	2.43	4.85	3.31	1.1	2.04	3.91	3.81	0.81	0.59	1.38	2.05	4.81	3.73	0.26	1.94	3.72	3.77	4.27	11.33	4.79	4.73	6.99	6.12	9.29	4.31	3.52	2.18	10.39	5.66	5.65	8.09	4.54
NM_007188	ATP-binding cassette sub-family B member 8,	0	3.54	4.39	3.25	4.86	4.14	3.24	2.17	2.06	1.42	3.99	3.23	3.96	6.76	3.3	7.67	2.71	5.37	2.59	1.77	4.85	6.16	3.12	4.78	6.19	8.63	7.3	18.06	9.03	3.45	3.37	6.09	3.79	2.11	3.33	2.1	1.94	6.53	5.61	5.39	4.34	2.37	2.1	7.74	6.11	2.9	5.13	3.95
NM_019624,NM_203444,NM_019625	ATP-binding cassette sub-family B member 9	0	3.95	1.36	0.46	0.47	0.86	2.06	0.8	0.58	0.49	1.27	0.2	2.68	1.39	3.16	5.59	0.77	1.16	1.44	0.28	1.32	7.47	1.39	1.7	1.92	3.53	2.45	2.61	3.21	0.24	0.93	1.72	1.88	0	12.67	0.78	0.76	2.34	2.69	0.67	1.37	0.24	0.72	2.25	2.69	0.43	1.19	0.54
NM_032583,NM_145186,NM_033151	ATP-binding cassette sub-family C member 11	1	0.07	0.01	0.02	0	0	0.01	0	0	0	0	0.02	0.02	0.09	0	0	0	0.01	0	0	0.01	0.01	0	0	0	0.05	0	0	0	0	0	0.05	0.09	0	0	0	0.02	0	0	0	0.03	0.01	0.03	0	0	0	0	0.05
NM_000352	ATP-binding cassette sub-family C member 8	1	0	0	0	0	0	0.01	0	0.02	0	0	0	0.02	0	0	0	0	0	0	0	0	0	0	0	0	0	0	0	0	0	0	0	0	0	0.03	0	0	0	0	0	0	0	0	0	0	0.01	0	0
NM_020297,NM_020298,NM_005691	ATP-binding cassette sub-family C member 9	1	0	0	0	0	0	0	0	0	0	0	0	0	0	0	0.02	0	0	0	0.01	0.01	0	0	0	0	0	0	0	0	0	0	0	0	0.04	0	0	0	0.01	0	0	0	0	0	0	0	0	0	0
NM_000033	ATP-binding cassette sub-family D member 1	0	6	4.03	6.22	17.72	5.33	2.67	1.7	0.66	0.99	2.85	2.37	1.43	6.85	2.39	5.02	4.83	5.01	2.67	4.45	5.44	1.96	3.45	2.61	9.14	10.44	9.3	15.45	54.46	5.35	4.52	4.71	5.09	4.41	1.7	1.49	1.52	6.48	7.89	9.38	4.86	3.06	3.59	8.3	6.89	2.36	6.78	5.59
NM_005164	ATP-binding cassette sub-family D member 2	0	0.17	0.15	0.02	0.1	0.31	0.03	0.01	0.04	0.17	0.25	0	0.35	0.09	0.05	0.41	0.14	0.73	0.22	0.09	0.12	0.22	0.1	0.04	0	0.11	0.08	0.09	0	0.01	0.2	0.3	0.04	0.18	1.09	0.06	0.29	0.88	0.35	0.4	0.13	0.09	0.06	1.46	0.61	0.33	0.96	0.69
NM_001122674,NM_002858	ATP-binding cassette sub-family D member 3	0	1.83	1.27	0.3	1.44	1.5	0.16	0.37	2.25	1.23	3.55	0.26	2.67	2.59	0.97	5.09	1.05	3.24	1.84	0.68	0.89	2.11	1.57	0.12	0.19	1.09	0.3	0.98	0.74	0.07	0.8	1.78	1.25	3.05	16.75	3.13	5.15	5.51	9.92	7.86	5.86	2.57	1.15	6.59	4.89	3.28	2.27	2.7
NM_005050	ATP-binding cassette sub-family D member 4	0	4.67	3.59	2.16	4.37	3.45	1.9	0.51	1.5	4.18	6.71	1.36	3.05	7.96	2.02	7.1	3.43	6.08	3.11	1.64	4.37	3.82	3.68	1.2	4.23	5.79	5.69	17.46	9.71	0.76	3.99	4.59	4.58	4.09	7.95	5.26	4.79	7.6	12.84	6.53	6.23	4.08	3.6	11.03	10.03	5.14	12.17	6.39
NM_002940,NM_001040876	ATP-binding cassette sub-family E member 1	0	2.91	0.99	0.24	0.58	1.01	0.28	0.33	1.44	2.68	11.88	0.07	1.58	2.68	0.59	2.67	0.91	2.8	0.95	0.45	0.38	1.55	0.88	0.11	0.45	0.7	0.59	2.05	0.37	0.05	1.29	1.01	1.58	1.15	12.57	5.18	5.02	5.4	4.22	4.42	4.16	1.71	1.39	4.37	2.2	2.48	2.7	2.08
NM_001025091,NM_001090	ATP-binding cassette sub-family F member 1	0	3.71	1.47	1.68	4.21	0.93	0.99	0.13	0.43	1.17	6.01	0.52	0.34	1.11	0.41	1.26	0.42	1.54	0.62	0.68	0.55	0.72	0.57	0.68	0.95	1.29	2.3	2.82	2.27	0.2	1.36	1.1	1.36	0.18	0.34	1.38	1.88	1.92	2.54	2.21	1.09	0.67	0.97	4.06	1.07	2.08	3.04	2.14
NM_005692,NM_007189	ATP-binding cassette sub-family F member 2	0	4.14	3.96	5.34	8.73	4.09	3.82	0.84	2.97	2.75	6.11	0.92	2.98	4.81	2.61	9.78	4.99	6.15	2.94	2.44	3.39	5.02	3	2.23	4.94	5.76	6.4	13.67	6.87	1.03	2.83	6.24	4.87	6.6	6.2	2.01	2.13	8.12	5.9	11.95	5.32	2.91	2.42	11.77	6.89	8.85	16.4	6.81
NM_018358	ATP-binding cassette sub-family F member 3	0	19.85	10.79	11.01	24.68	8.78	11.49	5.89	3.33	10.12	23.91	5.62	7.9	13.33	6.29	13.48	10.03	10.58	5.53	6.29	8.16	11.86	8.44	6.25	17.01	24.72	17.3	45.42	38.12	4.36	10.85	16.53	11.03	14.3	15.41	18.61	13.93	16.95	42.58	21.61	19.87	9.38	16.3	21.27	14.95	12.06	28.43	13.61
NM_207627,NM_207628,NM_207629,NM_004915,NM_016818,NM_207174	ATP-binding cassette sub-family G member 1	0	12.96	1.79	16.31	26.4	2.07	1.85	1.02	1.57	11.33	70.6	0.78	3.37	1.67	1.51	7.15	4.52	4.09	2.79	5.18	2.78	0.81	2.37	1.1	2.78	9.55	3.36	15.06	16.71	0.34	5.22	3.6	29.36	14.7	8.24	11.71	18.52	8.23	21.24	16.54	14.73	6.96	5.09	6.57	10.64	2.12	11.66	12.74
NM_004827	ATP-binding cassette sub-family G member 2	0	3.11	0	0.01	0.05	0.45	0.04	0.06	0.08	0.44	1.97	0.06	0.06	2.13	0.01	0.68	0.61	0.08	0	0.03	0.05	0.01	0	0.04	0	0.03	0.09	0	0.04	0.02	0.09	0.02	0.22	1.22	0.1	0.18	0.11	0.45	0.13	0.6	0.07	0.08	0.06	1.2	1.42	0.03	0.31	0.08
NM_022169,NM_001142505	ATP-binding cassette sub-family G member 4	1	0	0	0	0	0	0	0.01	0.04	0	0	0	0	0	0	0	0	0	0.01	0	0	0	0.03	0	0	0	0	0	0	0	0	0	0	0	0	0	0.04	0	0	0	0.03	0	0	0	0	0.01	0	0.01
NM_022436	ATP-binding cassette sub-family G member 5	1	0	0.03	0	0	0	0	0	0	0	0	0	0.06	0	0	0	0.14	0	0.01	0	0.01	0.02	0	0	0	0	0	0	0	0	0	0	0	0	0	0	0	0	0	0	0	0	0	0	0	0.01	0	0
NM_022437	ATP-binding cassette sub-family G member 8	1	0	0	0	0	0	0	0	0	0	0	0	0.02	0	0	0	0	0	0	0	0.01	0.02	0	0	0	0	0	0	0	0	0	0	0	0	0	0	0	0	0	0	0	0	0	0	0	0	0	0
NM_080650,NM_001141972	ATP-binding domain-containing protein 4 isoform	0	0.26	0.17	0.22	0	0.25	0.07	0.12	0.43	0.07	0.16	0	0.24	0.28	0.09	0.6	0.16	0.77	0.38	0.09	0.1	0.33	0.36	0.08	0.14	0.3	0.02	0	0.59	0	0.16	0.29	0.29	0.25	2.05	0.28	0.18	1.52	0.35	0.96	0.22	0.06	0.14	2.25	0.52	0.64	0.77	0.57
NM_001096,NM_198830	ATP-citrate synthase isoform 1	0	13.61	9.41	7.45	28.14	8.85	5.02	1.06	5.98	4.33	14.28	1.55	9.95	10.27	3.75	16.22	9.16	14.45	5.89	5.73	6.35	10.04	9.31	3.08	6.83	7.05	15.81	29.18	19.74	1.37	11.26	8.14	15.98	14.45	30.57	10.94	6.01	20.69	35.51	25.57	18.79	9.63	6.87	36.27	12.68	16.4	25.84	15.2
NM_006660	ATP-dependent Clp protease ATP-binding subunit	0	9.47	2.96	0.95	4.8	3.52	1.3	0.7	2.46	7.46	21.4	2.19	2.82	8.42	1.38	8.82	3.99	5.99	3.16	2.23	2.21	2.83	4.09	0.26	2.66	1.94	2.05	6.57	2.6	0.13	4.1	2.04	4.12	5.74	10.62	5.75	6.55	8.48	11.6	9.1	5.62	2.64	3.95	14.43	8.28	4.52	7.06	8.22
NM_025049	ATP-dependent DNA helicase PIF1	0	0.7	1.11	0.64	0.42	1.29	0.82	0.27	2.18	0.17	0.8	0.45	3.39	2.22	1.13	2.1	0.35	2.71	0.74	0.32	1.85	3.38	1.44	1.96	1.57	1.9	2.54	3.96	1.53	0.12	1.65	0.96	2.5	0.68	4.81	1.12	0.45	0.79	0.51	1.18	1.24	0.33	0.35	6.67	2.07	2.97	1.7	0.25
NM_032941,NM_002907	ATP-dependent DNA helicase Q1	0	4.48	2.6	0.46	2.54	3.36	0.39	0.43	3.2	2.29	10.27	0.64	2.35	4.72	1.35	6.71	2.29	5.56	2.52	0.94	0.83	3.72	4.35	0.54	1.05	1.23	1.64	6.42	3.27	0.1	2.43	2.66	1.88	2.76	6.36	1.93	3.12	4.84	8.12	9.36	4.59	2.17	1.54	8.33	3.43	4.34	4.03	3.98
NM_004260	ATP-dependent DNA helicase Q4	0	2.38	3.89	2.46	0.93	1.47	2.58	1.36	4.73	1.2	2.11	1.54	3.8	3.42	2.21	5.67	1.1	4.69	1.51	0.73	5.01	6.37	3.3	5.49	4.41	5.3	4.64	6.42	3.32	0.8	3.34	2.25	3.84	0.93	2.72	1.09	1.28	3.55	2.6	3.46	2.5	0.35	1.28	5.49	2.75	2.55	0.85	1.59
NM_004259,NM_001003716,NM_001003715	ATP-dependent DNA helicase Q5 isoform 1	0	1.45	2.76	3.12	5.31	3.04	3.15	1.15	0.73	0.4	1	1.66	2.8	7.68	2.41	5.62	3.31	3.63	1.66	2.02	4.01	4.25	2.99	2.77	3.32	5.56	5.48	11.87	9.18	2.51	1.32	3.59	5.79	3.87	2.32	0.89	0.95	4.99	2.44	4.43	2.15	1.55	0.98	5.55	4.5	2.95	9.42	3.5
NM_001357	ATP-dependent RNA helicase A	0	22.6	8.35	6.81	11.56	8.54	4.12	1.87	5.78	21.21	62.46	1.85	8.33	11.94	4.3	21.99	9.19	12.69	5.26	4.12	4.21	8.19	7.92	2.48	6.62	8.69	9.25	28.39	19.08	0.73	10.02	12.78	9.34	15.2	29.21	19.69	25.97	20.15	42.77	27.38	22.83	13.04	11.36	25.6	15.21	17.23	28.85	16.84
NM_004939	ATP-dependent RNA helicase DDX1	0	8	8.53	4.28	6.71	8.79	5.61	1.25	7.45	7.27	26.55	0.65	12.47	8.33	6.83	31.54	7.81	13.32	5.33	3.26	2.68	16.5	11.2	2.61	4.55	5.84	5.43	28.41	9.66	1.15	3.54	12.77	17.49	13.73	42.26	8.38	7.08	21.76	16.93	31.38	12.52	4.32	4.72	19.42	10.81	20.01	18.75	8.96
NM_006773	ATP-dependent RNA helicase DDX18	0	4.75	2.1	1.24	2.52	2.94	0.94	0.35	2.32	3.18	11.97	0.45	2.78	1.57	1.22	5.83	2.01	3.68	1.69	0.79	0.92	2.61	1.8	0.42	0.83	1.35	1.16	3.57	2.07	0.16	1.88	2.12	2.13	2.08	11.32	3.43	3.37	6.29	6.82	7.02	6.34	3.18	1.95	7.23	5.76	3.88	6.69	3.6
NM_018332	ATP-dependent RNA helicase DDX19A	0	4.87	2.86	2.97	4.92	2.3	1.91	0.86	1.65	2.08	7.12	0.65	2.41	2.04	1.83	6.28	1.75	5.67	2.35	1.48	3.2	2.62	2.04	1.09	2.58	3.24	4.48	16.19	7.44	0.68	3.15	4.36	2.61	1.97	5.73	2.71	2.57	6.11	6.28	6.52	4.76	3.24	2.35	8.38	5.86	5.34	11.55	4.24
NM_001014449,NM_007242,NM_001014451	ATP-dependent RNA helicase DDX19B isoform 3	0	5.18	2.15	2.51	5.19	2.44	1.37	0.89	1.48	4.39	11.05	2.32	1.45	3.24	0.89	4.13	2.59	3.85	2.9	1.74	2.8	2.08	1.33	1.66	2.39	3.09	3.91	8.04	6.65	0.45	3.87	3.9	2.48	2.65	4.18	3.37	3.21	4.5	6.25	5.68	4	2.76	3.11	8	2.88	3.46	8.48	3.42
NM_020414	ATP-dependent RNA helicase DDX24	0	59.12	20.29	19.92	38.73	10.32	16.65	9.6	4.31	25.6	102.13	9.91	9.14	27.03	6.69	18.43	12.17	25.72	9.54	7.05	14.47	9.79	7.52	5.9	13.14	15.74	25.07	63.34	45.54	1.58	22.55	21.51	13.72	18.07	23.12	41.29	22.81	34.58	42.49	34.23	17.13	14.3	22.31	47.33	29.54	29.98	78.35	21.39
NM_013264	ATP-dependent RNA helicase DDX25	1	0	0	0	0	0	0	0	0.03	0	0.06	0	0.06	0	0	0	0	0	0	0	0.1	0.05	0	0	0	0	0	0	0	0	0	0	0	0	0	0.18	0.05	0	0	0	0.19	0	0.02	0	0	0	0	0
NM_005804	ATP-dependent RNA helicase DDX39	0	110	35.1	43.24	32.45	36.84	31.73	30.73	43.76	98.39	122.9	38.92	43.68	92.28	24.18	78.66	35.4	56.85	24.76	19.36	140.03	46.19	34.3	38.05	61.6	96.25	55.99	125.42	77.62	12.03	58.17	46.53	56.23	58.14	68.32	101.33	118.62	83.7	108.62	126.35	116.12	44.7	52.79	78.59	91.59	72.51	77.28	48.56
NM_001356,NM_001193417,NM_001193416	ATP-dependent RNA helicase DDX3X isoform 1	0	56.47	6.82	3.55	16.98	6.08	2.34	3.21	8.25	27.4	92.56	3.2	6.79	10.55	2.46	23.52	8.14	12.55	6.96	6.06	7.84	6.65	7.44	0.97	3.18	4.62	4.25	18.16	18.36	0.46	14.03	5.9	12.1	17.74	33.35	14.09	35.66	20.23	130.53	39.95	38.88	18.62	11.03	19.26	27.79	6.54	10.38	47.04
NM_001122665,NM_004660	ATP-dependent RNA helicase DDX3Y	0	0	0	0	0.05	4.04	0	4.34	5.23	0	0.05	4.29	6.92	0	1.67	0	4.66	7.18	3.98	0	8.02	0.01	2.56	0	0	4.17	1.77	15.77	0	0.39	0	2.61	0	0	0.04	15.78	41.05	0.07	83.48	0.05	25.88	0	0	8.74	0	3.86	5.53	19.06
NM_203499,NM_007372	ATP-dependent RNA helicase DDX42	0	11.85	9.2	4.78	14.15	8.13	4.67	1.03	2.68	8.21	17.33	1.59	5.65	13.24	2.94	13.06	7.09	12.79	5.35	4.45	7.37	5.93	8.5	1.69	5.13	7.43	9.49	23.25	14.85	0.84	7.05	8.86	13.39	9.21	13.98	5.56	8.59	14.92	21.08	18.3	8.87	5.33	6.37	29.55	14.07	9.19	27.26	17.4
NM_024045	ATP-dependent RNA helicase DDX50	0	4.07	2.6	0.7	2.22	3.73	1.16	0.81	4.23	4.57	11.34	0.33	6.26	6.2	1.62	8.18	2.71	5.01	2.25	1.52	1.72	4.78	3.88	0.97	2.26	3.22	2.3	9.78	2.77	0.32	1.78	3.99	5.04	2.47	10.59	4.69	5.33	6.29	8.47	8.27	5.67	2.49	1.44	6.8	6.41	4.85	5.42	3.86
NM_175066	ATP-dependent RNA helicase DDX51	0	4.79	2.2	1.79	3.96	1.54	1.69	1.23	0.88	1.93	7.35	1.25	1.51	7.13	1.41	4.66	1.91	3.76	1.95	1.17	4.81	2.72	1.74	1.29	2.94	5.1	3.13	10.1	5.1	1.18	3.03	4.09	0.9	2.08	3.62	3.69	2.61	5.78	4.72	3.55	2.82	2.03	2.57	5.06	4.72	2.51	8.06	3.69
NM_024072,NM_001111322	ATP-dependent RNA helicase DDX54 isoform 2	0	23.05	8.55	6.96	18	8.1	7.9	3.04	4.49	12.68	28.26	4.46	4.48	13.7	3.95	12.7	5.81	11.04	6.12	4.1	6.94	6.74	4.03	5.74	13.12	12.05	16.07	28.15	23.21	2.58	13.59	12.71	4.96	4.91	8.28	7.36	8.78	10.85	15.06	11.35	8.57	4.51	7.18	21.23	11.58	6.55	18.3	7.74
NM_020936	ATP-dependent RNA helicase DDX55	0	3.23	2.24	1.38	2.49	2.38	0.91	0.97	1.55	1.83	6.98	0.68	3.27	3.98	1.31	4.5	1.8	4.02	1.41	0.71	2.38	2.57	2.8	0.5	0.86	1.82	1.46	4.28	2.09	0.31	1.67	2.12	1.62	2.98	5.37	1.74	1.04	6.71	3.99	5.32	2.73	2.03	1.86	5.36	3.53	4.11	6.67	3.47
NM_019030	ATP-dependent RNA helicase DHX29	0	6.79	2.13	0.85	2.62	1.98	0.91	0.41	1.62	3.01	7.23	0.44	2.18	4.72	1.38	6.12	1.38	3.06	1.52	0.97	1.42	2.51	1.74	0.31	1.56	0.92	1	2.25	1.79	0.04	1.57	1.86	2.06	2.47	9.23	2.42	3.71	4.95	6.21	9.29	5.87	2.85	1.49	7	4.98	3.28	3.57	2.56
NM_004941	ATP-dependent RNA helicase DHX8	0	16.86	6.69	8.93	19.59	7.63	5.21	2.27	1.61	7.07	24.09	1.8	4.78	7.68	2.53	12.51	6.62	7.73	3.3	4.96	3.88	4.24	6.13	2.03	4.91	5.83	9.74	30.04	21.68	1	6.78	6.69	14.08	11.33	7.89	11.43	8.13	10.85	31.01	17.03	10.21	7.32	11.87	18.26	10.74	10.73	19.26	14.62
NM_133637	ATP-dependent RNA helicase DQX1	0	0	0.12	0.17	0.21	0	0.42	0.02	0.11	0.03	0	0.11	0.08	0.46	0.11	0.18	0	0.07	0.01	0	0.37	0.44	0.1	0.06	0	0.05	0.1	0.64	0.31	0	0	0.13	0	0.36	0.23	0.1	0.09	0.04	0.22	0.09	0.03	0.01	0.01	0.07	0	0.13	0.14	0
NM_003171	ATP-dependent RNA helicase SUPV3L1,	0	15.2	4.53	3.57	4.64	3.83	3.22	3.91	5.26	25.91	32.2	3.58	9.6	18.88	2.44	9.55	3.12	6.47	2.34	1.17	3.49	6.31	4.15	1.84	3.85	5	5.33	15.47	4.56	0.69	6.55	4.54	6.31	3.37	14.1	16.91	25.2	8.15	23.62	7.93	8.66	7.09	6.96	9.94	8.48	8.24	10.38	4.78
NM_014263,NM_139312	ATP-dependent metalloprotease YME1L1 isoform 3	0	17.06	11.53	7.39	14.67	12.36	5.27	3.45	12.24	18.89	42.03	3.66	16.02	13.24	6.69	32.09	12.99	15.9	7.07	5.86	7.94	15.47	13.58	1.66	5.77	8.35	8.05	26.76	19.65	1.01	7.2	12.68	24.51	15.23	48.46	18.47	23.37	23.21	72.57	43.75	39	13.03	10.58	25.62	21.71	18.21	19.94	23.92
NM_002241	ATP-sensitive inward rectifier potassium channel	0	0.41	0.01	0.01	0	0.57	0	0	0	0	0.05	0.05	0.15	0	0	0.02	1.19	0.2	0.03	0.01	0.12	0.31	0.06	0	0	0.04	0.54	1.22	0.59	0	0.05	0.07	0	0.22	0.05	0.08	0.31	0.75	0.22	0.74	0.07	0.04	0.05	0.89	0.03	0.59	0.11	0.04
NM_000525,NM_001166290	ATP-sensitive inward rectifier potassium channel	1	0.1	0.04	0.01	0.03	0.06	0.1	0.12	0	0.02	0.11	0	0.07	0	0.01	0.11	0	0.13	0.02	0	0.05	0.01	0.06	0.02	0.1	0.03	0.09	0.21	0.04	0	0.02	0.04	0	0	0.09	0.02	0.05	0	0.1	0	0.13	0.02	0.09	0.23	0.06	0	0.23	0.07
NM_153765,NM_153767,NM_153764,NM_153766,NM_000220	ATP-sensitive inward rectifier potassium channel	0	0.12	0	0	0	0	0	0	0.06	0.13	0.1	0	0.13	0	0.14	0.28	0.14	0.18	0.14	0.08	0.13	0.06	0.07	0.02	0.12	0.11	0	0	0	0.04	0.09	0.1	0	0	0.05	0	0.22	0.04	0.51	0.78	0.46	0.18	0.03	0	0.91	0.11	0	0.23
NM_004982	ATP-sensitive inward rectifier potassium channel	1	0	0	0	0	0	0.01	0	0	0	0	0	0	0	0	0	0	0	0	0	0	0.02	0	0	0	0	0	0	0	0	0	0	0	0	0	0	0	0	0	0	0	0	0	0	0	0	0	0.03
NM_021012	ATP-sensitive inward rectifier potassium channel	1	0	0	0	0	0	0.01	0.02	0	0	0.02	0	0	0	0	0.02	0.02	0	0	0	0.01	0.01	0.01	0	0	0.05	0	0	0	0	0	0	0	0	0	0	0.03	0	0.06	0	0	0	0	0	0	0.01	0	0.03
NM_013348,NM_170720	ATP-sensitive inward rectifier potassium channel	0	0.19	0.2	0.12	0.14	0.07	0.08	0.16	0	0.29	0.92	0.12	0.03	0.19	0.1	0.11	0	0.2	0.04	0.02	0.1	0.07	0.02	0.03	0	0.06	0.17	0.9	0.61	0.03	0.04	0.09	0	0.18	0.1	0.15	0.63	0	0.7	0.07	0.09	0.12	0.2	0.15	0.06	0.12	0.2	0.27
NM_002243,NM_170736,NM_170737	ATP-sensitive inward rectifier potassium channel	0	15.8	47.44	119.24	63.78	67.6	35.58	0.53	14.31	9.57	4.31	0.89	78.02	33.04	15.44	135.11	155.28	50.71	21.22	72.89	74.74	21.59	95.05	10.31	20.95	47.26	53.7	254.36	154.53	0.37	17.6	29.47	258.34	141.37	53.52	17.21	24.99	108.46	416.86	342.37	178.36	63	44.01	18.39	117.37	31.91	82.81	205.72
NM_004317	ATPase ASNA1	0	135.53	31.84	40.94	71.92	47.34	28.15	14.21	26.66	37.46	118.06	26.14	38.43	181.6	23.4	84.02	67.74	45.48	22.71	26.12	35.73	47.71	35.61	25.39	88.05	84.17	60.06	133.66	133.09	13.08	58.11	72.53	36.55	75.24	65.01	46.56	28.24	73.63	95.37	69.5	69.63	54.6	43.46	117.12	106.95	43.71	93.28	48.19
NM_020135,NM_130395	ATPase WRNIP1 isoform 1	0	10.05	5.25	4.51	11.22	10.57	3.27	0.56	5.5	5.21	9.21	0.78	4.19	7.5	2.08	13.96	4.43	10.22	4.98	2.86	6.75	5.38	5.18	1.99	5.57	5.98	8.66	31.49	15.81	0.47	4.37	4.84	6.33	5.88	11.03	3.73	6.03	9.94	15.92	14.05	5.93	3.18	1.99	14.87	8.77	7.47	11.55	8.5
NM_032810	ATPase family AAA domain-containing protein 1	0	2.07	1.18	0.37	1.75	2.52	0.44	0.32	1.55	3.01	7.58	0.28	3.64	1.94	0.8	3.65	1.38	2.66	1.09	0.44	0.67	2.1	1.87	0.25	0.45	0.52	0.5	5.75	0.72	0.23	0.95	0.87	3.82	1.4	11.25	2.92	3.72	5.84	9.45	6.43	5.47	2.18	1.11	4.08	3.62	2.27	3.18	2.66
NM_014109	ATPase family AAA domain-containing protein 2	0	1.93	1.41	0.33	0.58	1.05	0.15	0.27	3.8	1.13	4.55	0.13	2.3	1.2	0.38	1.83	0.35	3.8	0.78	0.31	0.37	2.01	1.93	0.31	0.5	0.63	0.7	3.25	0.26	0.06	1.43	0.73	2.81	1.08	5.77	1.63	2.29	3.23	3.87	3.93	2.31	0.98	0.83	5.69	1.26	4.28	1.3	0.9
NM_017552	ATPase family AAA domain-containing protein 2B	0	1.78	0.5	0.17	1.22	0.6	0.16	0.2	0.37	1.65	3.51	0.53	0.77	0.65	0.23	1.33	0.44	0.82	0.41	0.36	0.68	0.52	0.75	0.06	0.16	0.51	0.52	2.01	0.92	0.13	0.53	0.59	0.94	1.18	1.88	1.23	1.09	1.52	5.45	1.77	1.58	0.74	0.47	1.3	1.13	0.58	1.5	1.51
NM_018188,NM_001170535,NM_001170536	ATPase family AAA domain-containing protein 3A	0	3.08	2.17	2.01	2.59	1.82	1.49	2.24	2.09	1.37	2.4	2.08	2.04	4.44	2.02	5.32	1.24	3.08	1.32	1.09	2.04	3.95	1.95	3.4	3.66	5.4	3.77	5.73	4.73	1.42	2.65	3.12	3.22	1	2.19	1.57	2.07	4.46	0.63	3.57	1.73	0.83	1.35	4.27	2.56	1.83	4.26	1.8
NM_031921	ATPase family AAA domain-containing protein 3B	0	4.65	2.48	1.69	3.45	2.24	1.78	2.88	3.17	6.62	9.21	5.37	4.48	13.79	3.12	5.78	3.03	3.29	1.88	1.14	4.48	4.78	2.5	3.26	7	8.16	3.43	11.89	8.48	1.98	2.7	4.82	3.9	2.22	2.87	4.76	4.96	1.82	5.9	4.87	2.5	1.36	1.68	6.85	5.76	1.8	5.48	2.67
NM_001039211	ATPase family AAA domain-containing protein 3C	1	0	0.03	0.01	0.06	0.06	0.04	0.07	0.01	0	0.06	0.02	0.04	0.37	0.07	0.11	0	0.02	0.03	0	0.02	0.1	0.04	0.01	0	0.05	0.02	0	0.2	0	0.06	0.02	0.13	0	0	0.06	0	0	0	0	0.04	0.01	0.01	0.08	0.13	0.04	0.06	0.11
NM_024857	ATPase family AAA domain-containing protein 5	0	0.55	0.15	0.03	0.04	0	0.02	0.04	0.51	0.18	0.89	0.08	0.15	0	0	0.2	0.12	0.32	0.08	0.04	0.12	0.2	0.14	0.02	0	0.07	0.02	0	0	0.01	0.19	0.16	0.26	0.25	0.79	0.28	0.29	0.43	0.32	0.51	0.36	0.13	0.15	0.9	0.32	0.47	0.37	0.08
NM_178190,NM_016311,NM_178191	ATPase inhibitor, mitochondrial isoform 2	0	19.71	21.08	13.6	12.51	26.7	15.04	4.64	27.51	10.99	25.76	7.43	33.35	50.72	18.49	53.4	19.1	32.39	17.49	10.89	17.73	44.19	34.03	18.64	22.9	38.4	23.44	70.47	48.92	4	17.04	35.92	62.08	21.65	71.77	20.67	17.07	31.51	45.78	43.15	26.91	11.71	8.75	31.54	28.11	24.23	28.17	20.61
NM_130384,NM_032166	ATR-interacting protein isoform 1	0	1.13	2.42	2.14	4.14	2.17	2.2	1.6	1.42	1.76	4.61	1.75	3.15	3.15	1.46	3.95	2.59	3.75	1.85	1.51	3.51	2.79	2.65	2.29	2.28	4.27	4.21	9.67	9.6	1.47	1.08	3.57	5.46	2.87	3.13	2.38	1.91	4.92	4.85	5.67	2.56	1.58	1.84	5.78	3.27	3.87	10.72	2.72
NM_015120	Alstrom syndrome protein 1	0	1.37	0.27	0.17	0.52	0.06	0.16	0.03	0.1	0.17	0.89	0.08	0.17	0.56	0.08	0.18	0.16	0.37	0.13	0.09	0.1	0.12	0.11	0.09	0.12	0.14	0.17	0.9	0.39	0.05	0.2	0.3	0.22	0.07	0.45	0.53	0.22	0.46	0.35	0.47	0.27	0.1	0.14	1.1	0.32	0.3	0.57	0.37
NM_017688	B box and SPRY domain-containing protein	0	0.14	0.97	0.24	0.38	0.43	0.45	0.17	0.59	0.31	0.52	0.2	0.85	0.28	0.14	1.05	0.07	0.94	0.3	0	0.49	0.72	0.96	0.57	0.36	1.18	1.35	0.73	0.94	0.27	0.36	0.41	0.29	0.39	1.51	0.4	0.33	0.19	0	0.54	0.19	0.16	0.09	1.23	0.42	1	0.62	0.25
NM_001187	B melanoma antigen 1 precursor	1	0	0	0	0	0	0	0	0	0	0	0	0	0	0	0	0	0	0	0	0	0	0	0	0	0	0	0	0	0	0	0	0	0	0	0	0	0	0	0	0	0	0.05	0	0	0	0	0
NM_182482	B melanoma antigen 2 precursor	1	0	0	0	0	0	0	0	0	0	0	0	0	0	0	0	0	0	0	0	0	0	0	0	0	0	0	0	0	0	0	0	0	0	0	0	0	0	0	0	0	0	0	0	0	0	0	0
NM_182481	B melanoma antigen 3 precursor	1	0	0	0	0	0	0	0	0	0	0	0	0	0	0	0	0	0	0	0	0	0	0	0	0	0	0	0	0	0	0	0	0	0	0	0	0	0	0	0	0	0	0	0	0	0	0	0
NM_181704	B melanoma antigen 4 precursor	1	0	0	0	0	0	0	0	0	0	0	0	0	0	0	0	0	0	0	0	0	0	0	0	0	0	0	0	0	0	0	0	0	0	0	0	0	0	0	0	0	0	0	0	0	0	0	0
NM_182484	B melanoma antigen 5 precursor	1	0	0	0	0	0	0	0	0	0	0	0	0	0	0	0	0	0	0	0	0	0	0	0	0	0	0	0	0	0	0	0	0	0	0	0	0	0	0	0	0	0	0	0	0	0	0	0
NM_014270,NM_001126335	B(0,+)-type amino acid transporter 1	1	0	0.06	0.09	0	0	0	0.04	0	0	0.06	0	0	0.74	0.02	0.25	0	0.18	0.03	0	0.12	0.05	0.09	0	0	0.08	0	0.96	0.09	0	0	0.12	0	0	0.09	0	0.09	0.06	0.16	0.14	0.04	0.02	0.03	0	0.29	0.04	0	0.2
NM_181780,NM_001085357	B- and T-lymphocyte attenuator isoform 1	0	0	0.83	0.6	1.27	0.94	0.71	0.05	1.37	2.09	4.5	0.03	1.7	2.22	0.57	2.88	0.72	2.9	0.86	0.45	0.47	3.77	1.4	0.29	0.21	0.58	0.45	5.95	0.98	0.02	0.1	0.67	1.18	1.4	7.85	0.72	2.43	4.61	2.5	3.76	1.55	0.27	0.28	1.66	0.94	1.63	1.59	2.3
NM_181844	B-cell CLL/lymphoma 6 member B protein	0	0	0.05	0.01	0	0	0.03	0	0	0.05	0.17	0	0	0	0	0	0	0.03	0.01	0	0.03	0.01	0	0.01	0	0.03	0	0	0.13	0	0	0	0	0	0	0.06	0.05	0	0.22	0	0	0.01	0.01	0.08	0	0.01	0	0.01
NM_020993,NM_001024808	B-cell CLL/lymphoma 7 protein family member A	0	7.01	1.46	0.56	2.53	1.08	1.12	0.26	0.35	1.63	7.35	0.78	0.5	3.05	0.24	1.8	0.3	2.2	1.1	0.29	1.74	0.83	0.98	0.23	1.5	1.6	2.67	3.83	4.71	0.13	1.28	0.62	0.64	0.32	2.44	2.3	1.66	1.95	1.71	1.01	1.68	0.41	0.95	5.44	2.3	0.78	3.15	2.36
NM_001707	B-cell CLL/lymphoma 7 protein family member B	0	64.3	14.46	12.43	26.94	19.22	9.01	10.37	19.84	54.13	107.68	15.56	17.89	44.7	10.12	52.39	16.88	30.26	17.14	10.96	17.03	17.25	19.33	7.75	28.31	35.15	24.21	64.54	68.4	4.3	30.54	27.03	17.03	19.93	39.36	44.72	79.26	31.33	127.71	40.89	53.93	33.66	38.64	40.69	54.03	20.93	48.03	34.59
NM_004765	B-cell CLL/lymphoma 7 protein family member C	0	36.93	18.82	21.71	34.84	34.79	14.59	40.05	28.73	26.35	44.44	40.05	54.98	116.16	31.28	70.41	27.59	42.58	21.59	17.27	24.74	44.53	46.15	43.05	77.14	70.3	44.81	142.58	130.49	30.64	42.15	53.48	52.16	27.92	40.87	50.84	32.43	55.5	33.48	38.88	27	15.84	18.77	35.12	38.14	17.43	51.03	17.55
NM_004326	B-cell CLL/lymphoma 9 protein	0	0.89	0.68	0.62	0.88	0.42	0.41	0.11	0.15	0.14	1.07	0.13	0.39	0.83	0.23	0.98	0.21	0.91	0.41	0.33	0.49	0.24	0.24	0.13	0.8	0.7	1.06	1.99	0.74	0.09	0.5	0.62	1.14	0.68	1.2	0.48	1.01	1.07	1.93	1.23	0.79	0.49	0.63	2.42	1.1	0.74	1.73	1.13
NM_182557	B-cell CLL/lymphoma 9-like protein	0	15.8	3.01	2.99	19	4.09	1.07	0.6	0.51	4.94	26.35	0.7	1.31	7.4	1.3	2.63	2.31	7.85	3.65	1.77	2.06	1.29	1.14	1.21	5.22	5.29	7.73	23.85	11.28	0.43	2.44	2.92	0.86	0.93	1.41	7.49	10.77	7.12	7.96	3.95	2.13	0.87	2.08	11.59	5.08	2.32	9.59	4.54
NM_001039933,NM_021602,NM_000626	B-cell antigen receptor complex-associated	0	52.57	37.64	29.38	81.38	34.58	75.38	17.56	21.55	85.81	240.58	22.21	72.19	349.31	41.67	108.73	25.7	82.6	39.5	14.59	82.42	67.46	87.18	22.24	95.95	149.92	60.99	245.25	228.05	18.81	37.78	125.84	34.05	59.43	115.93	131.27	126.38	121.01	52.57	44.38	29.7	28.97	27.27	109.52	125.36	32.51	188.71	78.97
NM_001783,NM_021601	B-cell antigen receptor complex-associated	0	135.87	68.38	34.13	204.58	48.41	161.94	12.82	8.9	187.51	684.57	25.6	62.93	242.22	39.34	108.62	34.3	104.24	41.44	21.72	90.7	48.51	88.02	16.99	163.57	201.77	156.33	548.27	647.11	12.62	33.96	121.91	44.98	125.24	74.29	264.01	117.84	166.94	185.19	42.23	34.26	25.29	48.23	149.99	173.11	26.87	466.26	156.24
NM_001782	B-cell differentiation antigen CD72	0	3.64	12.66	5.01	10.36	10.67	15.57	1.77	1.12	14.53	9.49	1.45	11.47	20.45	2.68	11.74	3.26	15.83	5	2.55	24.22	5.46	12.04	2.12	11.65	16.12	18.99	74	68.09	2.15	3.45	10.53	2.59	5.41	4.89	7.95	17.29	12.12	8.91	7.96	2.31	4.49	2	36.32	14.82	9.34	34.47	14.37
NM_013314,NM_001114094	B-cell linker protein isoform 1	0	1.57	7.26	0.94	4.75	2.66	8.59	0.42	1.97	1.95	5.28	0.25	5.36	1.85	1.83	8.84	0.79	5.15	2.28	0.59	5.13	7.22	3.91	0.69	2.49	3.37	3.85	13.67	8.62	0.11	0.32	2.6	2.08	1.65	13.08	2.92	5.13	7.59	6.53	2.43	2.07	0.85	0.81	7.07	5.63	2.15	5.53	6.21
NM_005178	B-cell lymphoma 3 protein	0	253.17	72.53	137.59	162.85	77.97	41.7	38.94	41.56	110.03	159.48	62.03	81.17	83.86	16.72	82.51	129.77	40.37	21.55	77.25	48.29	28.56	41.24	39.31	109.24	126.44	117.96	353.34	518.21	12.51	64.31	33.31	177.99	117.43	41.11	86.29	219.78	72.78	864.23	110.17	194.27	42.26	113.86	52.41	111.03	23.53	58.61	221.22
NM_001130845,NM_001134738,NM_001706	B-cell lymphoma 6 protein isoform 1	0	81.62	94.78	48.22	90.9	115.96	23.8	10.66	30.07	35.87	41.61	15.09	129.28	40.35	17.38	132.55	95.91	45.03	20.53	42.06	72.13	40.02	107.73	10.29	8.82	31.02	62.15	243.08	81.77	3.9	23.66	30.34	332.5	95.92	83.21	38.07	189.33	95.14	624.25	226.32	200.12	51.19	38.64	36.61	98.41	35.84	51.89	227.11
NM_003921	B-cell lymphoma/leukemia 10	0	6.55	2.9	3.06	6.46	3.25	1.74	0.65	2.52	4.73	12.96	0.99	4.1	5.09	1.48	10.46	3.15	4.39	2.04	2.67	1.47	3.11	4.35	0.55	2.85	2.82	2.05	9.46	7.57	0.43	2.65	3	6.33	10.04	13.4	9.56	18.02	9.29	54.22	20.27	11.63	3.47	4.25	4.93	7.41	3.77	6.16	9.61
NM_138559,NM_018014,NM_022893	B-cell lymphoma/leukemia 11A isoform 3	0	1.59	0.75	0.52	3.49	0.88	1.33	0.31	0.22	2.48	1.59	0.44	0.67	2.31	0.4	2.13	0.89	1.79	0.57	0.24	1.94	0.64	1.26	0.15	1.14	1.32	1.68	4.56	3.84	0.29	0.69	1.34	0.75	0.97	1.88	1.48	8.35	1.94	3.58	0.92	0.88	0.65	0.52	2.14	2.52	0.49	3.04	2.74
NM_022898,NM_138576	B-cell lymphoma/leukemia 11B isoform 2	0	6.38	1.56	1.1	2.67	2.68	0.53	0.3	1.57	7.33	12.16	0.42	2.76	11.29	1.06	3.95	1.17	6.74	3.28	1.08	0.84	0.98	0.81	0.55	2.16	2.81	1.55	11.77	2.18	0.04	2.06	3.01	1.16	2.26	8	5.2	9.15	10.57	6.02	4.45	1.7	1.08	1.89	7.95	8.41	4.42	13.25	5.48
NM_001185100,NM_001185101,NM_001771,NM_001185099	B-cell receptor CD22 isoform 3 precursor	0	11.8	11.69	7.49	30.63	7.65	17.47	2.25	0.64	12.54	34.39	3.26	8.68	48.04	3.57	16.17	4.22	19.28	8.16	4.5	32.8	4.82	13.22	1.74	23.73	25.74	25.14	59.66	54.81	2.02	4.09	15.87	3.88	12.83	6.1	14.37	17.34	28.42	14.17	7.08	3.8	6.2	5.86	26.56	40.34	6.81	51.97	27.23
NM_018844,NM_001008405	B-cell receptor-associated protein 29 isoform b	0	1.98	0.85	0.6	0.77	1.37	0.44	0.39	1.06	0.91	3.02	0.28	1.6	2.78	0.87	4.02	1.19	1.56	1.1	0.36	1.05	1.51	1.83	0.27	0.35	0.73	0.7	2.48	1.68	0.13	0.85	1.47	1.45	2.33	4.14	2.76	2.45	3.29	4.76	5.39	4.37	2.26	1.11	2.81	3.11	1.78	3.77	1.89
NM_001139457,NM_005745,NM_001139441	B-cell receptor-associated protein 31 isoform a	0	56.06	25.85	43.15	56.13	25.5	39.05	14.79	10.54	13.5	38.29	13.14	20.3	31.93	20.32	50.95	36.33	33.86	19.31	18.41	29.7	25.56	30.31	15.75	38.58	57.82	42.79	115.54	126.19	14.9	33.18	45.72	42.82	84.49	44.61	45.62	30.69	70.19	106.69	71.91	66.73	40.7	43.21	61.81	61.37	54.94	140.31	54.18
NM_017935,NM_001127507,NM_001083907	B-cell scaffold protein with ankyrin repeats	0	6.09	4.6	0.96	3.18	2.45	3.19	0.42	1.02	6.99	36.41	0.46	4.2	7.68	1.07	7.42	1.89	6.55	2.73	1.63	5.74	1.94	4.86	0.17	1.42	2.43	2.85	13.46	8.55	0.06	1.38	4.17	1.78	4.95	8.71	10.72	23.49	12.86	21.05	5.48	4.35	3.33	2.42	12.16	12.84	2.68	14.98	14.37
NM_001178098,NM_001770	B-lymphocyte antigen CD19 isoform 1 precursor	0	16.98	15.39	5.61	8.93	7.82	20.83	1.23	2.16	12.94	26.08	3.43	20.87	45.45	5.6	19.5	4.9	13.86	5.04	4.64	41.8	10.08	17.54	1.97	20.83	21.3	19.54	68.46	73.85	1.63	6.31	14.77	5.79	9.93	12.97	22.91	23.07	14.65	13.82	6.17	7.4	6	6.95	35.28	28.44	5.77	69.13	14.69
NM_152866,NM_021950	B-lymphocyte antigen CD20	0	10.72	8.69	3.11	7.45	8.52	10.16	1.58	2.75	22.53	79.55	1.66	30.68	59.61	3.88	29.28	7.53	25.98	10.12	3.54	19.51	8.16	27.09	0.39	4.2	5.56	5.17	54.36	36.38	0.29	2.2	9.67	5.53	12.51	14.33	25.06	41.01	31.09	16.52	15.33	5.28	4.8	3.54	35.22	45.71	8.36	48.96	40.6
NM_000710	B1 bradykinin receptor	0	0	0	0	0	0	0	0	0	0	0	0	0	0	0	0.09	0	0	0	0	0	0	0	0	0	0	0	0	0	0	0	0	0	0.22	0	0	0	0	0	0	0	0	0	0	0	0	0	0
NM_000623	B2 bradykinin receptor	1	0	0	0	0	0	0	0.01	0	0	0.06	0	0	0	0	0	0	0.01	0	0	0	0	0	0	0	0	0	0	0	0	0	0	0	0	0	0	0	0	0	0	0	0	0	0	0	0	0	0
NM_015681	B9 domain-containing protein 1	0	0.67	1.43	0.44	0.24	0.66	1.39	0.35	1.5	0	0.94	0.91	3.94	1.39	1.95	4.09	1.17	0.94	0.71	0.06	0.76	5.66	1.36	0.87	0.55	3.63	1.25	3.98	0.85	0	0.9	1.8	1.53	0.32	21.62	1.96	0.19	1.01	2.38	0.13	0.28	0.2	0.23	2.47	0.55	1.04	0.45	0.15
NM_030578	B9 domain-containing protein 2	0	11.54	8.07	12.93	25.31	11.52	8.22	4.73	3.92	11.77	16.66	4.98	11.73	18.51	6.91	18.71	18.03	9.39	6.68	14.51	9	8.92	14.38	8.33	14.81	25.36	17.62	49.35	29.57	5.68	8.11	14.73	35.56	16.85	7.06	8.54	8.87	9.27	21.15	24.52	14.91	5.22	6.47	9.48	13.78	4.97	15.52	30.35
NM_001172415,NM_004323	BAG family molecular chaperone regulator 1	0	195.81	8.64	5.29	31.67	101.93	9.28	34.91	10.86	73.24	116.79	177.44	22.03	623.09	8.66	67.51	224.38	13.95	18.72	50.18	9.86	19.99	29.18	6.07	112.86	21.44	39.11	56.37	87.18	6.71	7.77	17.99	46.87	187.14	31	33.53	48.62	90.37	94.93	68.31	36.56	19.31	27.1	86.62	139.08	14.03	213.44	45.26
NM_004282	BAG family molecular chaperone regulator 2	0	1.52	0.99	0.93	0.11	1.86	0.69	0.25	1.7	0	4.31	0.14	1.28	0.28	0.22	1.64	0.44	2.67	0.74	0.36	0.58	2.18	0.59	0.3	0.17	0.8	0.79	2.57	0.15	0.02	0.63	0.51	1.73	0.57	5.72	1.28	1.29	2.62	1.62	4.16	1.48	0.64	0.55	3.58	1.1	6.9	1.5	1.25
NM_004281	BAG family molecular chaperone regulator 3	0	6.6	6.05	12.49	5.13	3.29	1.43	0.7	1.86	3.65	8.87	1.52	1.37	3.05	0.99	1.09	1.82	1.65	0.92	0.79	3.67	1.37	0.59	1.1	4.81	3.65	3.67	15.57	8.53	0.2	2.6	1.3	1.65	0.93	4.46	4.82	9.89	2.82	5.49	6.08	2.68	1.17	2.26	4.47	2.72	7.67	4.96	5.25
NM_004874	BAG family molecular chaperone regulator 4	0	1.88	0.34	0.17	1.22	0.56	0.29	0.13	0.3	0.9	2.8	0.13	0.52	1.2	0.21	0.98	0.75	0.83	0.35	0.17	0.73	0.44	0.65	0.05	0	0.73	0.46	2.4	0.72	0.04	0.77	0.86	0.22	0.39	1.43	0.9	1.53	0.54	4.06	1.27	1.68	1.3	1.5	0.9	1.84	0.63	0.85	0.79
NM_001015049,NM_004873,NM_001015048	BAG family molecular chaperone regulator 5	0	8.12	1.93	1.24	4.31	2.43	1.26	0.83	1.34	3.64	11.37	0.82	2.23	6.11	1.06	5.16	1.68	5.02	1.9	1.12	1.36	2.24	2.44	0.44	1.95	1.56	1.68	8.36	4.45	0.31	2.05	2.85	2.43	3.19	9.4	3.75	5.12	5.65	16.2	7.71	5.61	3.06	3.56	6.66	4.59	3.68	7.12	5.03
NM_001080519	BAH and coiled-coil domain-containing protein 1	1	0.12	0.01	0.04	0.88	0.18	0.07	0.02	0.02	0.04	0.13	0.03	0.03	0.28	0.06	0.28	0.12	0.11	0.16	0.11	0.21	0.02	0.14	0.01	0.22	0.09	0.14	0.26	0.44	0.05	0.15	0.17	0	0.07	0.06	0.01	0.02	0.07	0.19	0.18	0.06	0.09	0.09	0.16	0.16	0.02	0.2	0.12
NM_003933	BAI1-associated protein 3	0	4.84	2.65	2.95	4.01	3.52	4.27	3.19	1.81	2.13	4.85	6.46	5.15	9.63	2.94	7.74	4.83	3.19	2.52	2.12	5.5	5.16	4.74	5.88	8.9	11.48	5.7	13.39	13.35	3.34	3.8	5.67	9.21	8.06	8.3	5.14	3.46	5.93	8.12	5.7	4.88	1.83	2.73	4.19	5.89	2.81	7.35	7.22
NM_001123383,NM_001123385,NM_001123384,NM_017745	BCL-6 corepressor isoform a	0	4	1.13	0.68	5.22	0.79	0.39	0.57	0.22	0.98	12.74	0.28	0.26	0.93	0.25	1.1	0.54	1.4	0.51	0.4	0.64	0.43	0.61	0.19	0.22	0.44	1.76	3.64	1.53	0.01	1.39	0.16	0.51	0.72	2.1	3.4	2.08	2.01	4.09	2.1	2.04	0.52	1.06	4.88	1.1	1.42	2.5	1.42
NM_021946	BCL-6 corepressor-like protein 1	0	0.63	0.82	1.1	3.47	1.25	0.81	0.1	0.09	0.02	0.06	0.04	0.42	0.93	0.31	1.05	1.26	0.67	0.38	0.56	0.49	0.58	1.58	0.3	0.6	1.03	0.93	1.99	1.11	0.27	0.32	0.74	1.82	2.65	0.63	0.13	0.53	0.98	0.73	1.81	0.15	0.2	0.34	1.4	1.26	0.64	2.67	1.53
NM_004052	BCL2/adenovirus E1B 19 kDa protein-interacting	0	0.19	1.26	0.27	1.22	1.05	0.33	0.13	0.42	0.58	1.13	0	2.14	3.89	0.41	1.23	0.7	1.38	0.58	0.38	0.46	1.33	0.72	0.14	0.35	1.58	0.89	3.23	1.83	0.08	0.38	0.46	1.23	1.94	3.09	1.49	1.12	0.98	1.27	2.3	1.86	0.88	0.4	1.2	0.81	1.16	0.94	1.12
NM_004330	BCL2/adenovirus E1B 19 kDa protein-interacting	0	21.06	6.9	3.47	11.17	9.69	1.63	7	9.93	26.27	63.6	5.38	27.12	12.31	4.51	30.69	15.48	14.03	9.82	6.42	6.23	8.23	12.03	0.66	2.9	6.34	3.7	19.72	13.81	0.56	13.29	6.48	25.39	15.23	63.98	55.37	92.69	28.32	415.72	70.3	141.74	32.85	26.5	21.56	37.69	12.94	16.17	41.89
NM_004331	BCL2/adenovirus E1B 19 kDa protein-interacting	0	249.36	7.01	5.16	25.28	53.13	4.37	7.76	8.8	57.46	150.83	21.83	24.71	347.64	4.73	42.28	51.49	12.44	9.99	13.94	8.56	9.71	18.59	0.69	23.46	6.82	10.95	19.15	40.89	1.43	9.7	11.39	24.86	96.89	40.46	35.98	58.38	45.91	59.57	48.18	51.86	23.53	16.04	135.97	135.68	10.25	34.72	41.12
NM_006180,NM_001018064,NM_001018066,NM_001018065,NM_001007097	BDNF/NT-3 growth factors receptor isoform a	1	0	0	0	0	0	0	0.02	0	0.01	0.05	0	0	0	0	0.04	0	0	0	0.01	0	0	0	0	0	0	0	0	0	0	0	0	0	0.14	0	0	0	0	0	0.04	0	0	0.01	0	0	0	0	0.01
NM_153346,NM_001184767	BEN domain-containing protein 2 isoform 1	0	1.76	0.03	0.1	0.1	0.22	0	0.04	0	0.15	0.38	0.18	0.07	0	0.02	0.68	0.07	0.22	0.2	0.07	0.2	0.03	0.04	0.03	0	0.02	0	0.34	0	0	0	0.18	0.11	0	0.74	0.1	0.4	1.21	1.14	0.38	0.21	0.16	0.11	0.1	0.1	0.08	0.54	0.5
NM_001080450	BEN domain-containing protein 3	1	0.39	0.17	0.09	0.15	0.03	0.04	0.07	0.03	0.15	0.89	0.03	0.1	0.28	0.01	0.28	0	0.16	0.03	0.03	0.09	0.11	0.09	0.09	0.09	0.11	0.15	0.17	0.11	0.02	0.03	0.27	0.07	0.04	0.18	0.17	0.8	0.09	0.44	0.09	0.07	0.12	0.11	0.3	0.1	0.07	0.09	0.26
NM_001159547,NM_207406	BEN domain-containing protein 4 isoform b	0	0.53	0.11	0.07	0.01	0.11	0.04	0	0.06	0.12	0.73	0.03	0.33	0.09	0.04	0.12	0.07	0.2	0.03	0.02	0.21	0.12	0.09	0	0	0.05	0.18	0.79	0.24	0	0.06	0.15	0.02	0	0.21	0.22	0.37	0.22	0.19	0.09	0.21	0.04	0.03	0.9	0.29	0.41	0.31	0.45
NM_024603	BEN domain-containing protein 5	0	1.88	0.66	0.15	0.92	0.31	0.68	0.12	0.18	1.81	2.07	0	0.85	3.52	0.18	1.09	0.14	1.25	0.6	0.32	0.47	0.85	1.22	0.08	0.78	0.65	0.34	5.13	0	0	0.39	0.58	0.53	0	2.47	0.97	3.8	2.12	0.63	0.56	0.48	0.17	0.26	1.96	1.33	0.23	2.01	1.5
NM_152731	BEN domain-containing protein 6	1	0	0	0	0.16	0	0.01	0	0.03	0	0	0	0	0	0	0	0	0.01	0.04	0.02	0.03	0	0	0	0	0	0	0	0.24	0	0	0	0	0	0	0	0	0	0	0	0	0	0	0	0	0	0	0.03
NM_152751,NM_001100912	BEN domain-containing protein 7 isoform 1	0	0.39	0.26	0.54	0.97	0.17	0.42	0.57	0	0.12	2.5	9.56	0.86	0.28	0.06	0.23	1.28	0.39	0.18	0.13	0.12	0.09	0.59	0.08	0.36	0.27	1.08	0	0	0.03	0.19	0.32	0.5	0.36	0.5	0.31	0.1	0.24	0.35	0.74	0.27	0.09	0.25	1.02	0.94	0.06	0.51	0.86
NM_005868	BET1 homolog	0	0.72	0.94	0.33	1.66	1.12	0.49	0.17	1	0.55	3.21	0.06	1.8	1.11	0.99	3.06	0.47	2.04	0.67	0.37	0.48	2.63	0.83	0.31	0.62	0.92	0.9	5.88	0.76	0.17	0.57	0.84	2.08	0.9	5.48	0.46	0.53	2.21	2.54	2.84	1.52	0.47	0.29	2.94	1.07	2.12	1.33	1.91
NM_016526,NM_001098787	BET1-like protein isoform 2	0	14	12.97	9.41	18.26	12.13	7.9	1.84	4.86	7.16	33.39	2.3	9.22	23.42	5.69	24.64	8.79	16.22	8.99	6.17	7.39	11.34	9.4	4.84	9.46	13.88	16.48	48.67	31.84	2.11	14.68	14.31	8.95	9.93	26.16	8.58	3.1	18.18	35.16	16.67	17.21	13.49	15.8	23.66	26.08	11.08	33.82	20.23
NM_197966,NM_197967,NM_001196	BH3-interacting domain death agonist isoform 1	0	62.06	24.41	36.92	43.75	49.19	23.77	29.43	24.18	77.77	44.7	40.87	61.76	77.01	25.91	91.61	70.66	40.79	26.44	45.15	40.35	40.86	90.51	15.71	39.65	57.68	45.93	136.51	66.76	11.15	32.27	53.61	103.43	83.88	63.97	93.48	104.27	51.88	256.31	112.67	133.04	48.75	61.29	40.2	95.7	27.32	67.03	167.6
NM_001001786	BH3-like motif-containing cell death inducer	1	0	0	0	0	0	0	0	0	0	0	0	0	0	0	0	0	0	0	0	0	0	0	0	0	0	0	0	0	0	0	0	0	0	0	0	0	0	0	0	0	0	0	0	0	0	0	0
NM_001142528,NM_030639,NM_001142524,NM_001142526,NM_001142525,NM_001142527,NM_001142529,NM_001142530	BHLHB9	1	0.07	0.06	0.01	0.03	0.06	0.02	0	0.03	0.06	0.24	0	0.13	0.28	0.07	0.05	0	0.11	0.05	0.01	0.01	0.04	0.21	0.04	0	0.01	0.1	0	0	0.01	0.03	0.05	0.06	0.07	0.51	0.28	0.46	0.16	0.35	0.31	0.1	0.01	0.03	0.26	0.36	0.17	0.14	0.14
NM_012342	BMP and activin membrane-bound inhibitor homolog	0	0.72	0.1	0.94	2.24	0.7	0.41	0.14	0.23	0.05	0.8	0.16	0.24	0	0.06	1.81	0	1.03	0.03	0.18	0.49	0.28	0.06	0.01	0	0.13	0.55	2.37	0.26	0.52	0.9	0.72	1.1	0.68	2.15	0.2	0.85	0.95	1.27	0.22	1.61	0.39	0.25	0.44	0.42	0.22	0.23	0.45
NM_198892,NM_017593	BMP-2-inducible protein kinase isoform a	0	20.6	1.09	0.5	2.73	2.12	0.44	0.58	0.71	2.79	10.43	1.62	1.99	11.75	0.43	4.3	4.17	1.36	1.13	1.89	1.64	0.97	1.87	0.07	1.37	0.7	1.33	1.75	2.42	0.14	1.27	1.47	1.75	7.31	4.41	1.94	3.78	4.5	9.7	6.12	5.5	2.52	1.26	16.43	11.23	1.26	5.99	6.54
NM_133468	BMP-binding endothelial regulator protein	1	0	0	0	0	0	0	0.02	0	0	0	0	0	0	0.01	0	0	0	0	0	0	0	0	0	0	0	0	0	0	0	0	0	0	0	0	0	0.02	0	0	0	0	0	0	0	0	0	0	0
NM_032430	BR serine/threonine-protein kinase 1	0	1.01	0.87	3.54	3.3	3.46	0.97	0.33	0.34	0.4	0.32	0.88	0.82	1.48	1.16	3.88	1.75	0.61	0.39	0.64	3.03	3.76	1.56	1.17	3.54	3.69	4.35	13.95	12.5	4.63	0.84	3.17	3.77	0.57	0.29	0.22	0.58	2.27	0.73	1.47	1.07	0.4	0.21	1.94	0.97	0.51	2.41	0.56
NM_003957	BR serine/threonine-protein kinase 2	1	0.1	0.01	0.09	0	0.17	0.04	0.04	0	0	0.11	0.05	0.01	0	0	0	0	0.06	0.02	0.01	0.06	0.06	0.02	0.01	0.16	0.13	0	0.32	0.17	0	0	0.08	0.2	0	0.13	0.02	0	0.1	0	0.14	0	0.02	0.06	0	0.06	0.03	0.17	0.1
NM_139076	BRCA1-A complex subunit Abraxas	0	0.43	0.61	0.16	0.67	0.64	0.18	0.27	0.66	1.48	1.67	0.33	1.55	2.59	0.52	2.53	0	1.56	0.77	0.51	0.43	0.83	0.73	0.08	0.12	0.61	0.61	1.5	1.05	0.08	0.43	1.47	1.01	1.08	5	1.57	1.43	2.89	3.42	3.17	2.28	1.55	0.72	2.65	2.49	1.01	1.82	2.37
NM_199194,NM_199193,NM_004899,NM_199192,NM_199191	BRCA1-A complex subunit BRE isoform 2	0	16.91	10.91	16.19	16.42	6.59	12.41	8.2	6.02	5.98	15.88	10.5	13.69	18.14	5.45	21.24	13.29	12.84	6.55	9.51	11.37	8.75	8.89	5.7	15.21	15.82	13.21	17.43	40.5	7.31	11.98	16.23	21.11	27.64	20.03	15.21	7.86	23.89	39.06	23.75	20.17	12.3	12.79	25.29	15.92	18.41	50.18	17.1
NM_014173,NM_001033549	BRCA1-A complex subunit MERIT40	0	137.56	26.3	31.66	43.66	83.56	26.73	24.24	24.39	44.73	98.19	39.14	34	317.47	27.62	92.68	127.25	43.13	25.97	27.18	29.33	49.69	46.65	24.28	107.41	63.56	56.74	136.76	113.44	16.27	35.8	62.78	61.21	151.8	105.11	56.88	39.13	101.45	66.99	76.11	52.68	34.64	33.73	103.24	144.48	51.15	196.37	48.95
NM_016290	BRCA1-A complex subunit RAP80	0	25.99	6.31	8.77	15.72	12.38	5.72	4.69	3.94	12	42.65	15.69	8.95	20.73	3.35	20.08	15.04	11.62	5.61	7.41	9.63	7.4	12.74	2.05	7.86	10.55	8.75	31.08	24.51	0.82	7.92	8.34	22.06	15.84	15.22	11	16.98	17.36	33.67	29.85	19.43	8.1	11.68	15.09	17.34	8.52	18.92	18.75
NM_000465	BRCA1-associated RING domain protein 1	0	0.72	0.18	0.08	0.34	0.08	0	0.08	0.23	0.14	1.05	0	0.12	0	0.03	0.6	0	0.16	0.06	0.04	0.05	0.1	0.02	0	0	0	0.06	0.6	0.07	0	0.59	0.05	0	0.36	0.4	0.1	0.23	0.22	0.22	0.09	0.21	0.13	0.12	0.64	0	0.3	0.23	0.19
NM_006768	BRCA1-associated protein	0	8.48	2.58	2.88	6.68	3.6	2.51	3.71	1.85	4.55	15.19	4.59	3.93	7.03	1.98	7.51	4.08	4.15	1.72	2.63	3.2	3.4	3.81	1.08	2.59	3.92	3.58	7.53	7.22	0.67	3.72	3.59	9.34	8.46	9.04	7.77	6.51	7.15	16.58	10.41	10.02	4.78	6.38	8.12	5.82	4.92	9.73	5.83
NM_152743	BRCA1-associated protein required for ATM	0	13.11	8.84	6.69	23.53	9.15	6.66	4.93	7.53	7.55	19.34	5.14	12.56	30.64	8.42	21.36	6.46	17.6	8.41	9.03	14.18	9.52	11.54	9.98	16.99	19.8	15.7	35.75	22.31	7	16	12.43	6.2	6.95	5.42	10	5.5	12.58	12.37	9.65	18.32	4.1	13.39	13.49	21.13	3.99	9.48	8.77
NM_016567,NM_078469,NM_078468	BRCA2 and CDKN1A-interacting protein isoform	0	10.26	6.26	4.7	3.01	6.77	4.68	2.39	10.4	7.76	27.83	1.59	10.36	12.87	4.9	21.93	6.46	12.38	4.88	3.05	5.44	10.03	6.46	2.61	5.24	6.98	6.09	32.52	9.73	0.94	4.76	7.91	7.65	7.38	35.89	14.71	13.15	18.47	20.89	25.27	24.27	7.88	7.03	13.46	10.84	13.25	15.38	7.19
NM_001031705,NM_017863	BRCA2-interacting protein isoform 1	1	0	0	0	0	0	0	0	0	0	0	0	0	0	0	0	0	0	0.01	0	0	0	0	0	0	0	0	0	0	0	0	0	0	0	0	0	0	0	0	0	0	0	0	0	0	0	0	0
NM_080626	BRI3-binding protein	0	4.19	2.67	3.71	6.53	2.54	2.66	3.17	5.27	2.09	4.21	3.67	3.19	3.15	3.23	7.36	0.84	3.5	1.76	1.05	2.11	6.62	3.91	4.37	8.31	8.63	4.12	5.56	9.6	2.62	4.19	5.29	4.08	3.05	12.37	2.75	1.68	4.04	4.12	5.14	4.22	2.17	2.1	6	3.33	3.04	2.89	3.71
NM_182563	BRICHOS domain-containing protein C16orf79	0	5.81	2.97	2.63	3.18	6.21	4.27	5.88	3.57	4.28	8.44	5.56	6.35	22.31	5.06	14.21	9.28	5.79	3.99	2.97	4.91	8.6	6.97	4.91	11.24	10.13	5.9	18.5	13.83	5.54	3.5	7.34	8.26	4.62	2.29	3.8	4.66	4.92	2.54	2.84	4.41	1.5	1.46	3.93	6.66	1.53	5.9	5.49
NM_032182	BRISC complex subunit Abro1	0	6.5	3.37	1.46	4.29	2.62	1.09	0.89	1.91	3.2	14.41	0.91	3.49	3.52	1.5	6.64	2.36	3.55	1.5	1.38	1.04	3.24	3.37	0.35	0.35	0.95	2.44	6.91	3.18	0.36	2.86	3.76	6.25	2.19	10.08	4.54	7.18	5.92	42.42	9.38	16.61	5.47	5.43	6.13	5.44	4.12	4.94	4.26
NM_144695	BRO1 domain-containing protein BROX	0	6.53	2.02	1.28	5.79	1.68	0.38	0.7	1.14	2.21	10.45	0.83	1.65	4.35	0.31	3.33	0.96	2.3	1.26	0.96	1.16	1.03	1.44	0.08	0.31	0.89	1.32	4.21	2.51	0.05	2.68	0.78	1.54	1.61	2.38	2.12	3.15	2.01	14.11	5.61	4.31	2.51	1.82	5	2.98	1.33	1.22	5.72
NM_001143889,NM_001143888,NM_001143890,NM_018045	BSD domain-containing protein 1 isoform c	0	25.13	11.06	8.32	22.52	12.83	6.31	1.37	2.56	6.48	28.05	2.95	4.96	14.25	4.11	14.16	9.12	13.04	5.86	5.35	4.51	8.16	9.77	2.36	4.3	7.71	15.48	37.01	23.29	1.03	5.61	8.63	9.43	11.83	8.99	8.32	6.68	12.67	27.14	17.74	8.36	5.77	6.98	18.34	15.01	8.68	21.76	17.51
NM_031954	BTB/POZ domain-containing adapter for	0	9.95	3.52	2.87	7.16	4.67	1.61	1.58	2.25	6.29	15.46	0.87	5.63	6.94	2.18	8.38	3.68	7.11	3.21	2.35	2.13	4.82	4.22	1.49	4.37	4.03	5.9	17.09	10.91	0.76	5.33	4.97	6.31	5.59	13.23	7.99	6.81	11.54	30.34	9.54	10.51	5.41	5.76	17.24	7.34	6.59	11.43	7.1
NM_178863	BTB/POZ domain-containing adapter for	0	9.15	5.44	7.9	15.84	7.65	4.76	0.64	1.81	3.11	9.75	2.83	3.37	5.74	2.54	7.95	4.01	7.04	3.8	4.18	7.95	3.73	4.9	3.46	8.21	7.05	7.68	31.64	16.18	1.2	5	6.24	7.59	9.61	6.77	3.62	2.45	9.2	7.74	11.02	3.82	3.63	4.45	10.71	11.68	4.71	12	9.62
NM_021137	BTB/POZ domain-containing adapter for	0	2.63	2.99	2.53	5.7	2.96	1.62	0.6	1.01	1.47	5.29	0.49	2.09	2.41	1.32	5.6	2.75	4.25	1.57	1.35	2.01	3.18	3.15	0.69	1.59	2.29	2.61	10.7	6.28	0.59	1.71	3.44	5.04	3.84	3.24	2.19	1.21	3.16	9.64	5.38	2.42	1.61	1.37	4.62	4.01	3.53	5.13	4.24
NM_025238,NM_001011885	BTB/POZ domain-containing protein 1 isoform 1	0	11.64	3.24	1.37	4.4	4.42	0.68	1.07	4.85	14.92	36.54	1.33	7.93	11.2	2.07	11.63	4.38	7.68	3.94	1.89	3.52	5	5.09	0.54	1.26	1.81	2.04	7.38	1.94	0.47	5.22	4.13	5.61	3.37	27.85	11.37	20.31	12.98	36.24	17.39	22.83	8.51	4.78	13.61	10.03	6.59	7.18	9.02
NM_032320	BTB/POZ domain-containing protein 10	0	1.13	3.17	1.59	3.22	3.7	0.8	0.27	1.99	1.31	5.71	0.18	4.02	4.17	1.38	8.09	3.66	3.47	1.46	1.56	1.35	3.34	5.29	0.37	0.28	2.04	1.57	7.02	2.99	0.43	1.38	2.82	6.03	3.12	6.81	2.44	1.02	2.79	5.93	11.04	4.74	1.99	1.19	3.89	2.49	3.14	2.78	4.75
NM_144587	BTB/POZ domain-containing protein 16	1	0	0	0	0	0	0	0.09	0	0.05	0	0	0.03	0	0	0	0	0	0	0	0	0	0	0	0	0	0	0	0	0	0	0	0	0	0	0	0	0	0	0	0	0	0	0	0	0	0	0
NM_001080466	BTB/POZ domain-containing protein 17 precursor	0	0	0	0	0	0	0	0	0.09	0	0	0	0	0	0	0.07	0.21	0.02	0.05	0	0.03	0	0	0	0.1	0.11	0	1.69	0.2	0	0	0	0	0	0	0.04	0	0.07	0	0	0	0	0	0.18	0	0	0.26	0
NM_001145101	BTB/POZ domain-containing protein 18	1	0	0	0	0	0.07	0	0.05	0	0.15	0.08	0	0	0.19	0	0.04	0	0.02	0	0	0.03	0	0	0	0.22	0	0	0	0	0	0	0	0	0	0	0	0.08	0.07	0	0	0	0.03	0	0.05	0	0.04	0	0.04
NM_001136537	BTB/POZ domain-containing protein 19	0	18.55	2.42	0.39	0.63	0.9	0.29	0.16	0.55	3.43	7.04	0.24	1.47	0.83	0.41	3.47	3.22	1.01	0.27	0.98	4.18	0.44	1.12	0.97	0.78	2.02	3.43	0.81	2.6	1.33	1.51	0.7	4.82	1.72	0.19	1.03	6.53	0.52	41.06	4.24	7.44	1.29	1.73	0.1	2.23	0.17	0.14	7.62
NM_017797	BTB/POZ domain-containing protein 2	0	27.29	18.87	22.59	48.8	28.93	12.79	13.08	9.88	10.89	35.57	16.67	11.06	41.56	13.53	44.13	18.96	31.7	15.69	13.23	26.9	19.24	18.52	18.58	49.44	40.37	37.48	106.45	57.23	14.56	19.18	34.08	11.38	8.93	8.68	9.3	10.42	29.57	24.76	27.53	13.08	7.8	8.43	40.56	38.6	7.66	25.16	26.8
NM_181443,NM_014962	BTB/POZ domain-containing protein 3 isoform b	0	0.84	0.16	0.09	1.11	0.21	0.04	0.12	0.09	0.4	1.02	0.05	0.39	0.37	0.07	0.85	0.05	0.26	0.16	0.02	0.31	0.31	0.42	0.01	0	0.11	0.14	0.94	1.35	0.03	0.06	0.56	0.06	0.18	0.85	0.24	0.67	0.52	1.81	1.03	1.28	0.5	0.33	0.89	0.68	0.28	0.37	0.41
NM_033271	BTB/POZ domain-containing protein 6	0	12.02	7.57	6.48	8.76	7.63	3.53	2.95	7.07	5.41	13.5	4.56	9.02	18.97	5.83	20.53	6.09	14.11	5.52	3.53	9.39	10.37	7.75	5.33	11.11	15.5	12.31	36.82	20.74	2.56	9.98	10.25	10.26	9.96	20.51	10.78	7.67	17.23	25.05	16.49	13.25	8.39	4.86	15.33	14.23	12.93	17.39	12
NM_001002860,NM_018167	BTB/POZ domain-containing protein 7 isoform 1	0	3.78	0.55	0.19	1.15	0.81	0.16	0.48	0.42	0.94	4.2	0.58	1.13	1.76	0.42	1.8	0.79	1.29	0.76	0.46	0.63	0.68	0.95	0.18	0.12	0.58	0.59	1.86	1.05	0.1	0.67	0.44	0.81	1.15	2.29	1.12	1.6	1.43	4.47	2.32	2.42	1.04	0.91	2.02	2.14	0.81	1.79	1.92
NM_183242	BTB/POZ domain-containing protein 8	1	0	0.07	0	0	0	0	0	0	0	0	0	0.07	0	0	0.16	0	0.02	0	0	0.08	0	0	0	0	0.21	0	0	0	0	0	0	0	0	0	0	0	0.16	0.19	0.09	0.06	0.1	0	0	0.16	0	0	0
NM_001172418,NM_001099272,NM_152733,NM_052893	BTB/POZ domain-containing protein 9 isoform c	0	3.37	1.1	0.87	2.95	1.33	0.71	0.57	0.22	2.03	4.07	0.35	1.11	1.39	0.59	1.81	2.19	0.98	0.58	0.73	0.7	0.47	0.87	0.25	0.81	1.4	1.02	3.34	2.62	0.48	1.06	1.65	2.37	0.93	2.99	1.45	0.96	1.25	5.29	3.46	3.34	1.25	1.8	2.47	2.69	1.15	5.7	2.57
NM_198991,NM_001142730,NM_001136205	BTB/POZ domain-containing protein KCTD1 isoform	0	0.26	0.26	0.12	0.97	0.18	0.2	0.04	0.03	0.02	0.08	0.03	0.1	0.19	0.08	0.32	0.12	0.38	0.11	0.06	0.12	0.2	0.13	0.09	0.31	0.15	0.31	0.41	1.33	0	0.06	0.32	0.42	0	0.18	0	0	0.27	0.16	0.22	0.04	0	0.01	0.62	0	0.25	0.48	0.23
NM_001002914	BTB/POZ domain-containing protein KCTD11	0	1.64	1.51	3.53	7.14	2.71	1.56	0.17	0.78	0.29	3.05	0.64	0.74	1.48	1.12	3.5	3.78	2.64	1.18	0.94	2.09	1.46	2.14	0.53	2.39	3.4	3.79	10.4	10.25	0.75	1.77	3.25	3.4	2.37	2.73	1.41	0.98	3.01	5.42	2.81	2.64	1.97	1.23	4.85	2.52	1.97	5.5	2.41
NM_138444	BTB/POZ domain-containing protein KCTD12	0	6.67	2.96	2.33	22.45	8.72	1.18	0.41	3.76	0.99	4.99	0.27	4.52	0.93	5.11	29.85	7	10.15	4.95	4.02	6.1	6.7	4.56	0.36	1.88	3.02	4.36	13.07	8.24	1.94	11.91	6.22	3	28.6	57.12	5.37	12.41	40.75	46.61	75.24	72.65	31.87	7.39	15.07	19.73	13.4	13.28	18.34
NM_023930	BTB/POZ domain-containing protein KCTD14	0	0.19	1.91	0.63	2.18	0.6	0.1	0.02	1.47	0.26	0.3	0.34	0.37	0	0.1	0.94	0.12	1.49	0.11	0.16	0.62	1.43	0.06	0.17	0.1	0.38	0.18	7.12	8.62	1.3	1	0.04	4.1	0	1.6	0.04	0.41	3.7	0.51	3.46	0.54	0.47	0.31	1.1	0.29	0.93	0.62	0.18
NM_001129995,NM_001129994,NM_024076	BTB/POZ domain-containing protein KCTD15 isoform	0	0.89	0.12	0.3	2.55	1.56	0.2	0.16	0.22	0.18	0.6	0.17	0.47	2.31	0.92	3.36	1.56	0.63	1.11	0.51	1.04	0.82	1.15	0.19	1.87	1.48	0.52	2.78	3.82	0.44	1	1.43	0.15	0.29	0.99	0.57	0.19	0.94	0.35	1.74	1.51	1.1	1.17	1.54	2.43	0.25	2.07	0.98
NM_020768	BTB/POZ domain-containing protein KCTD16	1	0	0	0	0	0	0	0	0	0	0	0	0	0	0	0.04	0	0	0.01	0	0.01	0	0	0	0	0	0	0	0	0	0	0	0	0	0	0	0	0	0	0.05	0	0	0	0	0	0	0	0
NM_024681	BTB/POZ domain-containing protein KCTD17	0	5.01	4.74	4.04	13.54	7.75	3.51	4.96	3.44	4.62	10.75	6.84	5.75	14.81	6.31	21.19	5.55	9.55	5.94	3.42	7.3	7.96	7.23	6.02	18.37	19.14	13.52	31.53	33.87	9.09	7.57	15.14	7.56	6.74	10.28	8.91	4.81	16.22	9.96	10.93	7.87	7.32	5.09	13.11	10.48	4.81	17.36	4.81
NM_152387	BTB/POZ domain-containing protein KCTD18	0	3.95	1.57	0.47	4.71	1.71	0.81	0.21	0.97	1.38	8.09	0.35	0.82	0.65	0.65	3.04	1.35	3.54	1.62	1.13	2.77	1.43	1.4	0.29	0.83	1.75	1.75	4.64	3.21	0.07	2.19	1.49	1.12	2.15	6.37	2.41	1.34	5.2	15.41	6.73	5.78	3.52	1.89	6.72	4.69	2.56	4.26	3.47
NM_001100915	BTB/POZ domain-containing protein KCTD19	0	0.1	0.02	0	0.49	0	0	0	0	0	0.13	0.16	0.04	0	0.03	0	0	0.02	0.02	0	0	0.02	0.02	0	0.05	0	0	0	0.74	0	0.02	0.07	0	0	0.1	0.05	0	0.07	0	0	0	0	0	0.05	0.1	0.03	0.06	0.07
NM_015353	BTB/POZ domain-containing protein KCTD2	0	13.66	8.48	8.87	21.22	9.87	5.44	1.48	3.79	6.4	18.59	2.62	4.69	12.68	4.64	13.04	8.84	10.59	5.31	5.77	6.14	7.1	9.42	4.01	7.85	11.43	8.44	32.11	26.19	1.62	6.14	9.49	13.83	13.37	14.06	7.4	6.08	11.98	29.77	21.23	11.82	7.65	10.32	15.58	13.65	9.77	20.94	14.9
NM_173562	BTB/POZ domain-containing protein KCTD20	0	21.95	3.4	1.56	8.67	4.14	1.25	0.86	2.63	5.67	16.57	1.99	2.38	5.65	1.02	8.04	2.87	5.71	3.63	1.39	2.19	2.92	3.64	0.36	0.9	2.37	2.88	7.44	2.92	0.29	7.08	3.71	1.75	4.59	12.64	7.23	7.58	7.06	23.49	9.74	9.56	4.93	4.56	11.13	7.47	4.34	7.29	9.52
NM_001029859	BTB/POZ domain-containing protein KCTD21	0	1.11	3.81	4.97	11.17	3.83	3.17	0.04	0.44	1.34	2.85	0	0.62	1.02	0.97	4.23	3.36	2.33	1.09	1.95	1.78	2.72	3.22	0.57	1.9	2.04	3.65	9.9	7.92	0.46	0.44	2.89	4.84	3.19	1.28	1.16	2.94	1.7	3.84	5.74	1.43	0.49	0.33	3.35	1.2	1.84	3.04	3
NM_016121	BTB/POZ domain-containing protein KCTD3	0	0.48	0.32	0.07	0.48	0.41	0.02	0.06	0.28	0.14	0.54	0	0.5	0	0.16	1.42	0.28	0.36	0.4	0.19	0.46	0.32	0.35	0.04	0.17	0.07	0.17	0	0.15	0.03	0.34	0.9	0.24	0.14	2.72	0.22	0.11	0.66	0.76	1.5	1.6	0.8	0.18	1.08	0.71	0.2	0.31	0.44
NM_198404	BTB/POZ domain-containing protein KCTD4	1	0	0	0	0	0	0	0	0	0	0	0	0	0	0	0	0	0	0	0	0.04	0	0	0	0	0	0.02	0	0	0	0	0	0	0	0	0	0.04	0	0	0	0	0.03	0	0.07	0	0	0	0
NM_018992	BTB/POZ domain-containing protein KCTD5	0	11.47	4.86	4.59	13.97	7.21	3.47	0.54	1.33	3.92	16.03	0.34	2.44	1.85	2.41	9.46	3.89	7.39	3.18	3.8	2.28	4.14	4.53	1.04	3.8	7.16	7.16	24.07	18.87	0.6	9.43	4.87	3.93	4.73	4.82	3.66	2.95	6.16	12.65	10.93	5.05	3.8	4.55	16.38	6.7	4.95	7.83	7.3
NM_001128214,NM_153331	BTB/POZ domain-containing protein KCTD6	0	1.37	1	0.6	2.29	1.54	0.85	0.26	1.55	0.92	2.86	0.25	0.73	2.13	0.3	3.22	0.79	1.89	0.94	0.29	1.45	1.83	1.29	0.27	0.28	0.8	0.8	1.39	0.5	0.08	2.6	1.4	0.77	0.82	5.03	1.65	2.52	2.74	1.97	4.74	3.86	2.76	1.69	1.68	4.08	2.03	1.79	1.24
NM_001167961,NM_153033	BTB/POZ domain-containing protein KCTD7 isoform	0	1.66	1.72	0.6	1.9	2.31	0.88	0.16	0.16	0.25	1.05	0.36	0.48	2.87	0.54	1.58	0.56	2.28	1.61	0.4	1.11	0.92	0.99	0.28	0.71	1.3	0.83	2.5	1.96	0.06	0.77	1.51	0.63	1.04	1.46	1.26	0.38	3.23	3.61	2.14	0.75	0.77	0.79	2.94	2.2	1.5	5.84	2.11
NM_198353	BTB/POZ domain-containing protein KCTD8	1	0	0	0	0	0	0	0	0	0	0	0	0	0	0	0	0	0	0	0	0	0	0	0	0	0	0	0	0	0	0	0	0	0	0	0	0	0	0	0	0	0	0	0	0	0	0	0
NM_017634	BTB/POZ domain-containing protein KCTD9	0	0.26	0.18	0.13	0.42	0.18	0.05	0.1	0.34	0.18	1.02	0.22	0.76	0	0.16	0.85	0.12	0.49	0.19	0.09	0.17	0.33	0.29	0	0.16	0.23	0.16	0.34	0.33	0.05	0.28	0.16	0.35	0.9	1.79	1.12	0.73	1.27	2.76	1.48	1.21	0.64	0.15	0.81	0.74	0.6	0.37	0.5
NM_032725,NM_001159736	BUD13 homolog isoform 1	0	6.53	6.49	6.49	11.24	8.59	5.41	1.57	2.91	5.54	18.86	0.47	4.18	8.33	2.29	7.74	4.59	8.97	2.97	3.44	3.97	6.06	6.68	1.5	2.04	5.4	6.81	30.04	9.44	1.37	3.85	7.67	13.96	8.14	6.6	5.31	8.03	7.78	11.26	12.56	7.14	4.61	3.55	10.6	4.63	11.12	12.28	7.15
NM_024649	Bardet-Biedl syndrome 1 protein	0	1.66	1.89	0.78	2.46	0.77	0.61	0.08	0.38	0.39	0.52	0.08	0.53	1.02	0.3	1.03	0.37	1.51	0.86	0.59	1.04	0.92	0.72	0.4	0.67	0.77	1.49	2.87	1.07	0.1	0.55	0.84	1.69	1.51	1.94	1.01	0.26	1.65	1.87	1.57	1.06	0.75	0.41	3.04	1.78	0.9	2.44	1.8
NM_024685	Bardet-Biedl syndrome 10 protein	0	0.1	0.46	0.16	0.89	0.79	0.14	0	0.08	0.05	0.38	0	0.1	0	0.05	1.07	0.14	1.02	0.22	0.09	0.14	0.41	0.46	0.03	0	0.15	0.02	2.14	0.31	0.08	0.22	0.37	0.4	0.43	0.99	0.13	0.93	0.85	1.4	1.34	0.18	0.23	0.05	0.94	0.19	0.7	0.85	0.82
NM_001178007,NM_152618	Bardet-Biedl syndrome 12 protein	0	0.65	0.32	0.15	0.58	0.48	0.14	0.05	0.09	0.05	1.75	0.14	0.15	0.37	0.04	0.85	0.12	0.46	0.09	0.11	0.16	0.44	0.22	0	0	0.21	0.19	0.83	0.46	0.05	0.41	0.38	0.13	0.43	0.39	0.02	0	0.21	0.63	1.1	0.49	0.11	0.14	1.12	0.52	0.48	0.43	0.15
NM_031885	Bardet-Biedl syndrome 2 protein	0	2.67	1.5	0.87	3.57	2.44	0.73	0.3	0.62	1.45	5.31	0.17	1.34	3.7	0.9	4.52	1.1	3.51	2.22	1.21	1.28	1.42	2.14	0.09	0.5	1.05	1.05	3.79	0.72	0.22	1.14	2.04	2.26	1.51	2.32	1.53	2.03	3.65	3.04	6.17	2.53	1.92	0.85	6.36	3.46	2.18	7.23	3.3
NM_033028	Bardet-Biedl syndrome 4 protein	0	1.25	1.75	0.49	1.86	0.97	0.53	0.27	1.27	0.96	3.36	0.42	1.9	5.28	0.51	3.04	1.45	3.04	1.34	0.88	1.1	1.08	2	0.32	0.41	2	1.27	1.58	3.84	0.08	1.39	2	0.96	1.22	3.82	1.41	1.17	2.3	6.98	3.08	2.73	1.78	0.79	4.47	2.91	1.5	2.47	1.83
NM_152384	Bardet-Biedl syndrome 5 protein	1	0.19	0.05	0	0.04	0.07	0.02	0	0.02	0.03	0.11	0.06	0.05	0.19	0.01	0.04	0	0.13	0.04	0	0.03	0.06	0.04	0	0	0	0.02	0	0	0	0	0	0	0	0	0.09	0.03	0.07	0.1	0	0.03	0.05	0.04	0.15	0.16	0.03	0	0.11
NM_176824,NM_018190	Bardet-Biedl syndrome 7 protein isoform a	0	0.84	0.7	0.34	0.42	0.55	0.15	0.29	0.67	0.57	1.27	0.58	0.96	3.05	0.41	1.9	1.26	0.98	0.52	0.33	0.6	1.12	1.02	0.21	0.93	0.25	0.64	1.73	1.66	0.1	0.37	0.86	1.86	0.82	1.97	0.54	0.65	1.76	1.65	2.35	0.82	0.45	0.2	1.74	1.29	0.9	0.94	0.65
NM_000057	Bloom syndrome protein	0	0.82	2.02	0.65	0.51	1.47	0.56	0.42	2.13	0.78	6.22	0.28	2.56	1.76	0.9	3.63	0.89	2.47	0.47	0.54	0.55	3.18	2.17	0.98	0.73	0.81	1.53	2.29	0.87	0.34	0.9	1.4	4.76	1.58	6.03	1.15	1.16	2.76	8.12	4.63	2.06	0.78	0.63	4.32	1.42	4.23	2.1	1.19
NM_005956	C-1-tetrahydrofolate synthase, cytoplasmic	0	6.36	4.69	4.99	4.48	2.97	3.64	0.44	3.54	1.42	4.4	0.86	2.44	2.13	1.55	5.59	1.14	6.76	2.1	1.83	2.32	3.63	2.33	3.59	4.82	4.26	6.68	9.11	4.84	0.46	4.68	6.59	2.94	3.73	8.83	2.59	1.91	10.4	3.93	10.21	4.88	2.86	2.68	21.22	3.98	14.27	11.32	3.28
NM_001017369,NM_006745	C-4 methylsterol oxidase isoform 2	0	2.79	3.16	1.48	2.79	3.29	2.05	0.7	1.23	2.82	9.43	1.62	3.06	3.7	1.13	5.75	2.71	3.45	0.77	0.65	0.77	6.67	3.22	0.44	0.97	0.82	1.64	5.5	1.98	0.13	2.86	2.34	4.21	4.19	11.45	5.75	10.72	5.56	9.42	6.88	7.81	4.29	2.82	7.86	3.85	5.33	5.28	6.87
NM_001644	C->U-editing enzyme APOBEC-1	1	0	0	0	0	0	0	0	0	0	0	0	0.12	0	0	0	0	0	0	0	0	0	0	0	0	0	0	0	0	0	0	0	0	0	0	0	0	0	0	0	0	0	0	0	0	0	0	0
NM_001295	C-C chemokine receptor type 1	0	22.48	35.54	38.5	158.06	23.26	6.52	1.17	8.55	8.73	9.91	1.43	16.56	5.18	11.74	81.53	38.15	30.35	8.22	41.84	2.31	21.25	26.22	5.29	5.89	6.08	35.71	64.52	217.58	5	9.42	25.86	117.27	65.42	33.95	16.73	7	67.22	98.64	150.89	37.74	22.98	20.24	31.01	49.69	32.43	49.79	90.31
NM_016602	C-C chemokine receptor type 10	0	1.01	5.72	0.91	1.16	1.46	4.88	2.14	0.99	1.78	0.91	1.28	1.74	3.15	2.39	3.06	0.58	1.46	0.45	0.51	2.06	11.28	1.33	2.22	2.37	9.59	4.06	1.6	3.53	0.59	1.55	1.95	2.85	0	1.68	0.65	0.55	0.75	0.22	0.4	0.79	0.03	0.25	0.36	0.61	0.33	0.34	0.52
NM_016557,NM_178445	C-C chemokine receptor type 11	1	0	0	0	0	0	0	0.03	0	0	0	0	0	0	0	0	0	0	0	0	0	0.02	0.02	0	0	0	0	0	0	0	0	0	0	0	0	0	0	0.04	0	0	0	0	0	0	0.32	0	0	0.03
NM_001123396,NM_001123041	C-C chemokine receptor type 2 isoform B	0	4.7	13.08	14.36	43.15	35.3	9.21	0.21	14.7	1.95	1.21	0.14	15.18	8.89	15.14	136.73	28.85	24.16	8.91	9.86	2.99	42.85	24.08	4.18	2.8	4.95	16.31	40.92	8.83	3.43	6.69	25.13	17.36	20.83	75.09	0.75	6.5	45.83	24.16	115.44	16.53	9.36	6.23	25.85	25.88	30.77	24.91	22.02
NM_178328,NM_001837,NM_178329,NM_001164680	C-C chemokine receptor type 3 isoform 2	0	0.34	0.93	6.31	3.26	5.16	0.82	0.04	0.31	0	0.06	0.32	2.09	4.44	0.55	3.49	6.13	2.74	3.2	3.54	0.9	0.36	0.34	1.33	0.67	1.58	0.7	12.56	10.97	0.06	0.82	1.55	10.66	5.66	3.81	0.15	0.14	3.89	6.31	7.91	3.58	0.89	1.68	3.66	7.51	3.19	39.23	6.87
NM_005508	C-C chemokine receptor type 4	0	3.04	0.63	0.61	0.67	0.73	0.16	0	0.21	2.99	5.41	0.28	0.1	0	0.36	1.14	0	0.7	0.29	0.19	0.13	0.24	0.12	0.14	0.41	0.59	0.42	2.99	0.85	0.09	0.66	0.62	0.57	0.36	0.36	0.65	1.5	0.36	2.16	0.76	0.1	0.27	0.88	0.64	1.97	0.36	0.88	1.68
NM_001100168,NM_000579	C-C chemokine receptor type 5	0	5.16	6.33	8.56	9.75	7.99	2.43	0.13	3.35	0.77	8.76	0.23	4.05	2.31	3.57	7.03	2.26	10.36	3.25	1.01	1.02	8.64	5.12	5.48	3.51	5.46	7.06	21.93	16.55	0.61	8.18	7.78	8.02	4.66	14.84	1.89	0.52	9.26	3.61	15.69	2.74	2.25	1.72	11.24	4.17	25.83	7.8	2.56
NM_004367,NM_031409	C-C chemokine receptor type 6	0	4.05	0.29	0.42	2.16	0.52	0.5	0.06	0.07	1.4	4.52	0.05	0.24	0.93	0.29	0.89	0.37	1.16	0.4	0.11	0.43	0.29	0.75	0.08	0.55	0.95	0.43	3.55	0.94	0	0.87	0.3	0.33	0.25	1.24	1.2	1.57	1.8	4.44	1.23	0.89	0.45	0.63	1.68	0.87	0.23	2.78	2.87
NM_001838	C-C chemokine receptor type 7 precursor	0	36.04	36.06	43.56	36.64	43.55	21.27	7.81	0.82	112.47	444.82	6.36	24.95	138.83	8.16	42.21	15.62	58.61	13.48	19.53	5.86	14.68	9.78	6.84	16.21	13.36	21.81	428.62	35.81	0.59	14.52	26.74	42.03	22.33	19.32	69.82	55.39	66.06	59.89	41.7	11.35	13.57	33.72	38.21	69.17	48.74	131.29	139.35
NM_005201	C-C chemokine receptor type 8	1	0	0	0	0	0	0	0	0.05	0	0	0	0	0	0	0	0	0.02	0.02	0.03	0	0.03	0.04	0	0	0.3	0	0.58	0.41	0	0	0	0	0.22	0	0	0	0	0	0.34	0.12	0	0	0	0	0.03	0	0.05
NM_006641,NM_031200	C-C chemokine receptor type 9 isoform B	0	0.12	0.57	0.32	0.52	1.09	1.17	0	0.07	0.44	2.23	0.07	0.5	2.59	0.23	1.96	0.63	1.53	0.31	0.09	0.24	1.2	0.9	0.02	2.58	0.28	0.9	5.13	1.16	0	0.55	0.59	0.83	0.36	2.25	0.68	0.73	0.64	2.03	0.4	0.39	0.12	0.01	0.89	0.39	3.08	0.71	0.42
NM_003965,NM_001130910	C-C chemokine receptor-like 2 isoform 1	0	28.84	32.9	23.51	6.21	12.83	8.63	3.59	6.29	38.85	82.91	12.09	19.58	12.59	2.46	16.72	11.17	8.62	1.18	8.69	2	5.82	7.44	2.63	3.51	3.09	21.75	151.76	52.85	3.5	2.42	4.53	280.72	22.15	5.85	11.13	31.33	18.88	127.2	99.78	14.12	6.69	7.07	11.32	10.68	12.24	10.1	29.13
NM_002981	C-C motif chemokine 1 precursor	0	0	0.19	0	0.41	0	0.18	0	0	0	0	0	0.1	0	0	0.62	0	0	0	0	0	0.4	0.09	0	0	0	0.18	0	0.28	0	0	0	0	0	0	0	0	0.64	0	0	0	0	0	0	0	0.07	0	0
NM_005408	C-C motif chemokine 13 precursor	1	0	0	0	0	0	0.04	0.1	0	0	0	0	0	0	0	0	0	0	0	0.07	0	0.15	0	0	0	0	0	0	0.17	0	0	0	0	0	0.18	0	0.2	0	0	0	0.1	0	0.05	0	0	0	0	0
NM_032963,NM_032962	C-C motif chemokine 14 isoform 1 precursor	0	0	0	0	0.2	0	0	0	0	0	0	0	0	0	0	0	0.65	0	0	0	0	0	0	0.02	0	0	0.64	0	1.13	0.21	0	0.38	0	0	0	0	0	0	0.98	0	0	0	0.16	0	0	0	0	0
NM_032965	C-C motif chemokine 15 precursor	1	0	0	0	0	0	0	0	0	0	0	0	0	0	0	0	0	0	0.02	0	0	0	0	0	0	0	0	0	0	0	0	0	0	0	0	0	0	0	0	0	0	0	0	0	0	0	0	0
NM_004590	C-C motif chemokine 16 precursor	1	0	0	0	0	0	0	0	0	0.06	0	0	0	0	0	0	0	0	0	0	0	0	0	0	0	0	0.1	0	0	0	0	0	0	0	0	0	0	0	0	0	0	0	0	0	0	0	0	0
NM_002987	C-C motif chemokine 17 precursor	1	0	0.11	0	0	0	0.05	0	0	0	0	0	0	0	0	0.18	0	0	0	0	0.67	0.07	0	0	0	0	0	0	0	0	0	0	0	0	0	0	0.41	0	0	0	0.43	0	0	0	0	0.06	0	0
NM_002988	C-C motif chemokine 18 precursor	0	0	0.57	0.21	0	0	0.25	0	0	0.35	1.13	0	0.53	0	0.15	0.14	0	0.08	0	0	0.04	1.98	0.26	0.33	0	0.24	3.27	0	0	0	0.17	0	0.31	0	0.58	0	0	0	0	0	0.12	0	0	8.55	0	0.53	0.26	0
NM_006274	C-C motif chemokine 19 precursor	0	9.66	0	0.54	0	0	0	0.77	0.14	2.21	0	1.09	0.22	0	0	0.16	0	0	0	0	0	0.06	0.07	0	0	0.11	0.08	0	2.29	0	0	0.21	2.43	0	0	0.5	14.04	0.16	6.88	0	0.66	0.16	0.12	0	0	0	0	0.2
NM_002982	C-C motif chemokine 2 precursor	0	31.13	2.32	1.8	4.89	0.27	0.22	1.73	0.66	25.32	13.37	2	1.04	0	0.08	1.94	0.23	0.75	0.06	0.65	0.47	3.09	0.94	0.4	0	0.15	5.47	2.67	95.51	0.1	0.34	0.37	3.49	0.79	0	2.88	2.98	2.97	19.97	1.18	1.31	1	2.89	1.02	2.69	0	0.28	8.9
NM_001130046,NM_004591	C-C motif chemokine 20 isoform 2	0	52.85	0.04	0.05	0	0	0	1.24	21.87	61.42	193.51	19.39	0.24	0	0	0	0.21	0.04	0	0	0.14	0.1	0	0	0	0.13	0	0	0.94	0.23	0.08	0	0.28	0	0.7	3.19	167.58	0.13	64.2	0	0.21	0.09	0.31	0.18	0	0.04	0.26	16.09
NM_002989	C-C motif chemokine 21 precursor	1	0	0	0	0	0	0	0	0	0	0	0	0.06	0	0	0	0	0	0.05	0	0	0	0	0	0	0.25	0	0	0	0.04	0	0	0	0	0	0	0	0	0	0	0	0	0.05	0	0	0	0	0
NM_002990	C-C motif chemokine 22 precursor	1	0	0.01	0	0	0.07	0	0	0	0	0.08	0	0.04	0	0	0	0	0	0	0	0.01	0	0.05	0	0	0	0	0	0	0	0	0	0	0	0	0	0	0.07	0	0	0	0	0	0.05	0	0.03	0	0
NM_145898,NM_005064	C-C motif chemokine 23 isoform CKbeta8	0	1.49	0.17	1.3	0	0.32	0.05	0.06	0.47	0.99	0.8	0.15	1.81	1.02	0.3	2.31	0.28	0.1	0.22	0.69	0.43	1.25	1.37	0.58	0	0.54	0.4	0	0	0.43	0.51	1.22	5.68	0.97	0.95	0.64	0	0.19	1.78	0	2.15	0.12	0.2	0.99	0	0.83	4.94	1.49
NM_002991	C-C motif chemokine 24 precursor	0	0	0	0.11	0	0	0.09	0	0	0.74	0.35	0	0	0	0	2.49	0	0	0	0	1.56	0.12	0	0	0	0	0	0	0.87	0.54	1.26	0.19	0	0	1.65	0.38	0	0	0	0.34	0	0.63	0	0.85	0	0.31	0.57	0
NM_005624	C-C motif chemokine 25 precursor	0	0.36	0.73	0.36	0	0.67	0.11	0.36	0.22	0	0.7	1.89	0.23	0	0.02	2.26	0	1.26	0.25	0.06	0.23	1.42	0.28	0.52	0	0.59	0.62	3.83	1.77	0.13	0.36	0.16	0.26	0.32	4.01	0.61	0	1.45	0.92	0.42	0	0.67	0.19	0.85	0.84	0.25	1.84	0.33
NM_006072	C-C motif chemokine 26 precursor	0	1.11	0	0	0	0	0	0	0	0	0.22	0	0	0	0.1	2.19	0	0	0	0	1	0.08	0	0	0	0	0	0	0.57	0.21	0.8	0.62	0.42	0	1.05	0	0	0	0	0	0.79	0.07	0	0	0	0.07	0	0
NM_006664	C-C motif chemokine 27 precursor	0	0	0.08	0	0	0	0	0.18	0	0	0	0	0.23	0	0	0	0	0.07	0.25	0.12	0.06	0.29	0	0	0	0	0	0	0	0	1.15	0	0	0	0	0.46	0	0	0	0	0	0.17	0.19	0.35	0	0.17	1.39	0.16
NM_148672	C-C motif chemokine 28 precursor	0	0	0.17	0.1	0.54	0.49	0.04	0.1	0	0	0.6	0	0.19	2.41	0.02	0.27	0	0.35	0.25	0.33	0.36	0.1	0.5	0	0	0	0.43	0	0.57	0.05	0.79	0.59	0	0.72	0.55	0.83	0	0.28	0.35	0.16	0.22	0.46	0.37	0.18	0.91	0.18	0.26	0.79
NM_002983	C-C motif chemokine 3 precursor	0	277.07	6.93	6.85	0.42	3.55	2.43	177.42	46.24	202.85	297.87	1138	29.48	8.33	2.29	9.13	2.26	8.31	1.48	2.83	7.94	10.82	15.25	5.79	10.92	12.37	22.88	22.68	7.28	76.88	4.62	3.14	55.4	46.74	4.12	36.92	544.77	2.06	225.08	6.17	3.94	2.26	7.15	14.05	5.01	2.57	16.03	61.87
NM_002984	C-C motif chemokine 4 isoform 1 precursor	0	295.06	19.35	11.76	7.46	14.49	7.68	73.26	44.67	123.46	325.28	558.96	30.38	5.92	5.94	18.06	12.17	25.77	6.54	4.33	1.68	12.35	26.14	8.27	5.72	11.03	34.78	79.05	26.5	25.12	4.43	6.34	88.99	151.19	19.58	60.08	386.82	26.92	389.09	27.53	10.99	4.77	5.16	70.09	25.43	10.08	55.72	140.23
NM_002985	C-C motif chemokine 5 precursor	0	449.24	88.65	100.85	207.23	318.54	58.33	217.47	104.3	277.47	612.44	342.25	306.84	539.79	118.23	250.99	169.97	713.61	174.56	57.49	103.77	152.06	120.44	260.54	468.93	341.48	440.23	705.51	309.1	95.42	213.74	213.78	226.11	225.6	589.33	790.19	186.29	674.96	256.02	135.38	111.43	103.34	82.82	710.9	510.64	379.56	1116.27	109.87
NM_006273	C-C motif chemokine 7 precursor	0	0.77	0.13	0	0	0	0	1.1	0	1.99	0.78	1.62	0.07	0	0	0	0	0	0	0	0	0.11	0	0	0	0	0.13	0	0	0	0.16	0	0.29	0	0	2.18	0.22	0	1.36	0.16	0.67	0.05	0.27	0	0	0	0	1.42
NM_005623	C-C motif chemokine 8 precursor	0	1.01	0.24	0.29	1.68	0.32	0.05	0	0	0.5	0.3	0	0	0	0	0	0	0.35	0	0	0.02	0.42	0	0	0	0	0.08	0	9.53	0	0	0	0.18	0	0	0.21	0.21	1.21	0.67	0	0	0	0	0	0.19	0	0	0.34
NM_005456	C-Jun-amino-terminal kinase-interacting protein	0	0.51	0.03	0.01	0.11	0.13	0	0.38	0.01	0.35	0.45	0.18	0.1	0.46	0.07	0.18	0	0.07	0.18	0.03	0.38	0.06	0.04	0.06	0.05	0.33	0.15	0.15	0.57	0	0.19	0.12	0	0	0.2	0.42	0.34	0.04	0.29	0.09	0.18	0.07	0.17	0.15	0.42	0.02	0.06	0.04
NM_001040439,NM_015133	C-Jun-amino-terminal kinase-interacting protein	0	22.45	8.57	4.72	10.27	11.82	3.45	4.08	2.55	19.82	21.45	7.71	7.33	29.99	6.26	16.54	11.43	10.01	8.7	5.82	16.75	8.06	10	5.44	16.7	18.28	10.8	32.45	21.22	4.24	11.79	8.17	4.41	4.3	4.12	7.83	9.26	9.37	14.71	8.67	6.86	3.92	7.04	15.68	19.25	2.19	9.25	17.52
NM_001130528,NM_003971	C-Jun-amino-terminal kinase-interacting protein	0	6.41	1.49	1.08	4.17	1.98	0.56	0.75	1.54	8.16	6.5	0.77	3.27	3.24	0.53	5.32	2.54	2.47	1.51	1.35	1.67	1.4	2.37	0.17	0.66	0.87	1.15	4.6	2.05	0.15	2.46	1.63	3.46	4.73	6.26	6.13	19.92	4.53	25.4	9.54	11.63	6.02	3.95	4.91	6.11	1.91	3.91	12.44
NM_012324,NM_016431	C-Jun-amino-terminal kinase-interacting protein	1	0	0.01	0.19	0.46	0.06	0.05	0.04	0.03	0.07	0	0.08	0.09	0	0.06	0.37	0.16	0.14	0.11	0.05	0.1	0.1	0.04	0.1	0	0.39	0.18	0	0.04	0.08	0.02	0.29	0	0.18	0.09	0	0.05	0	0.16	0.18	0.06	0.07	0.06	0.13	0.16	0.01	0.31	0.19
NM_198390,NM_030629	C-Maf-inducing protein isoform C-mip	0	38.79	8.8	12.11	45.46	12.95	6.16	2.12	2.6	12.61	20.35	1.67	6.35	9.53	3.32	15.53	14.36	13.62	6.23	8.65	13.44	5.31	9.28	2.28	7.21	8.79	18.75	34.57	39.04	2.52	13.96	8.69	18.57	17.24	10.8	11.61	14.81	17.08	35.86	20.71	14.98	9.88	7.63	22.32	18.34	6.74	29.47	27.03
NM_012333	C-Myc-binding protein	0	3.76	3.71	3.19	5.93	6.56	3.41	0.79	4.92	1.73	3.93	0.49	8.81	3.79	3.92	17.56	8.53	8.24	3.64	3.48	2.9	11.08	12.76	1.48	2.49	4.59	2.55	18.85	7.33	0.96	2.68	5.87	15.96	6.6	32.17	4.06	1.96	12.27	25.74	23.11	15.09	6.08	3.5	8.18	8.61	9.46	10.13	9.96
NM_000634	C-X-C chemokine receptor type 1	0	9.59	83.71	440.82	602.13	168.29	95.35	0.52	9.53	10.98	2.21	0.34	78.16	70.81	24.78	189.13	401.3	91.79	29.69	138.71	36.76	32.21	162.38	29.53	61.47	145.07	115.17	607.38	1498.57	1.37	37.45	86.06	687.33	500.07	109.19	31.32	37.42	135.87	842.26	439.44	258.89	66.02	111.59	43.12	218.6	54.37	404.28	538
NM_001168298,NM_001557	C-X-C chemokine receptor type 2	0	1.08	17.76	124.16	365	60.81	33.3	0.14	4.3	1.01	1.43	0	25.87	18.88	5.36	58.54	120.05	40.69	13.97	45.95	17.53	6.74	57.62	8.16	15.85	27.59	41.01	189.03	301.51	0.12	10.06	26.17	93.74	133.63	42.01	3.54	2.42	46.25	139.19	156.7	88.46	13.02	13.87	18.32	70.53	22.03	103.6	169.09
NM_001504,NM_001142797	C-X-C chemokine receptor type 3 isoform A	0	13.08	7.57	8.9	9.83	5.72	9.65	1.4	4.25	7.96	52.27	3.89	4.49	5.28	4.66	7.77	1.45	14.49	5.35	2.2	2.38	6.92	2.93	13.95	18.22	16	11.19	23.38	12.65	1.29	7.68	6.53	6.09	3.51	9.46	18.33	5.64	9.55	2.66	8.02	5.98	1.44	5.78	20.54	6.83	13.53	14.07	2.9
NM_003467,NM_001008540	C-X-C chemokine receptor type 4 isoform b	0	321.49	80.53	57.27	116.26	56.8	62.75	15.69	43.35	319.96	1016.97	22.9	154.6	348.29	20.83	244.87	66.39	96.16	66.29	53.61	20.36	46.6	115.03	21.9	55.97	126.22	63.97	350.03	397.93	2.05	47.75	65.31	112.38	170.15	228.48	191.16	327.63	186.13	536.58	212.74	72.71	65.33	162.51	222.98	329.63	84	273.47	368.08
NM_001716,NM_032966	C-X-C chemokine receptor type 5 isoform 1	0	14.31	3.47	2.79	15.06	3.57	4.77	2.97	0.8	26.44	61.93	3.93	2.22	19.53	1.17	4.36	2.59	7.54	3.12	1.45	2.3	2.1	3.84	0.64	12.51	8.17	5.43	32.99	6.37	0.59	1.39	5.07	4.21	1.47	2.28	27.97	75.83	8.45	18.74	2.15	2.03	1.57	5.34	4.63	9.32	2.25	9.59	22.63
NM_006564	C-X-C chemokine receptor type 6	0	7.06	9.67	8.65	1.24	10.32	2.85	0.14	6.39	3.4	7.52	0.33	7.11	4.35	3.5	8.86	4.62	16.5	3.47	1.91	0.6	8.97	6.46	7.91	2.32	2.89	9.2	17.93	3.93	0.32	8.76	8.55	9.56	2.9	35.12	2.07	2.54	12.53	18.64	13.72	3.94	2.7	2.33	21.74	7.93	51.61	11.66	5.91
NM_020311	C-X-C chemokine receptor type 7	0	1.49	0.08	0.1	0.37	0.2	0.04	0	0.02	0.55	1	0	0.05	0	0.18	0.43	0.16	0.97	0.2	0	0.09	0.1	0.41	0.09	0.33	0.07	0.31	1.28	0	0	0.09	0.3	0	0.29	0.43	0.39	1.43	0.67	2.5	0.05	0.21	0.11	0.18	1.02	0.49	0.18	0.68	0.71
NM_001565	C-X-C motif chemokine 10 precursor	0	4.82	20.85	4.82	4.9	29.37	0.63	1	4.08	0.68	17.94	2.07	19.25	1.11	1.04	21.29	17.37	7.91	1	10.11	3.31	13.05	2.91	1.46	2.07	1.05	10.6	168.7	42.79	0.63	0.44	2.24	189.33	13.01	5.32	1.32	9.19	82.29	510.68	88.98	33.07	1.91	0.4	4.95	6.6	3.2	4.74	10.33
NM_005409	C-X-C motif chemokine 11 precursor	0	0.19	0.04	0.05	0	0.88	0.04	0.05	0.22	0.11	0.86	0.23	0.13	0	0.01	0.55	0.56	0.08	0	0.16	0.17	0.05	0	0	0	0	0.03	1.95	1.07	0	0	0	0.59	0.18	0.46	0.04	0.49	1.24	10.68	0.71	1.45	0.26	0.05	0.1	0	0.09	0.14	0.1
NM_006419	C-X-C motif chemokine 13 precursor	0	0	0.09	0	0	0	0	0	0	0.07	0.73	0	0.94	0	0	0.28	0	0.02	0.02	0.05	0	0.18	0.12	0	0	0	0.05	0	0	0	0	0.52	0	0	0	0.17	0.35	0	0.22	0	0.22	0.03	0.07	0	0	0.09	0	0.12
NM_004887	C-X-C motif chemokine 14 precursor	0	0	0	0	0	0	0.03	0.04	0.01	0	1.51	0	0	0	0.02	0.18	0	0	0.01	0	0.07	0	0	0.08	0	0	0.02	0	0	0.06	0	0	0	0	0	0	0.13	0	0	0.07	0.31	0.02	0.04	0.08	0	0.02	0	0
NM_022059,NM_001100812	C-X-C motif chemokine 16	0	59.24	13.97	36.22	43.34	23.51	13.11	5.81	3.31	39.43	34.74	5.42	31.76	19.34	6.26	42.61	30.62	14.74	11.64	19.4	12.28	6.11	24.67	5.44	15.85	28.67	34.07	91.09	170.6	4.01	18.82	17.82	53.87	52.83	9.92	31.79	16.9	15.77	131.96	33.74	45.68	18.14	25.92	28.89	55.03	11.08	40.85	47.19
NM_002089	C-X-C motif chemokine 2	0	38.88	0.11	0.14	0.09	0	0	3.92	20.69	62.05	23.58	15.56	0.39	1.11	0.2	0.2	0.14	0.75	0.06	0	0.84	0.14	0.38	0	0.43	0.94	0	0	0.52	3.09	0	0.06	0	0	0.75	10.88	178.99	0.1	37.22	0.85	0.97	0.16	0.14	0.77	0.84	0.38	1.39	14.1
NM_002090	C-X-C motif chemokine 3	0	14.43	0.21	0	0	0.52	0.06	0.8	7.97	20	10.81	10.86	0.36	0	0.1	0.2	0	0.08	0.18	0.14	0.74	0.19	0.22	0	0.45	0.39	0.27	0	0.26	3.61	0.5	0.24	0.4	0	0.39	2.4	28.16	0.3	11.03	0.98	0.78	0.13	0.15	0.13	0	0.29	1.79	12.58
NM_002994	C-X-C motif chemokine 5 precursor	0	4.84	0.03	0.15	1.93	0.41	0.07	0.03	0	0.33	0.65	0	0.04	0	0.01	1.67	0.21	0.34	0.17	0.46	0.13	0.12	0.04	0	0.21	0	0	2.48	0.26	0.13	0.1	0.34	0.68	0.36	0.24	0.06	0.28	2.09	3.49	0.87	0.61	0.37	0.46	0.13	0.61	0.04	0.6	0.75
NM_002993	C-X-C motif chemokine 6	0	0	0	0	0.13	0	0	0	0	0.26	0.14	0	0	0	0	0.14	0	0.06	0	0	0	0	0	0	0	0.09	0	0	0	0	0	0	0	1.08	0.36	0.28	1.39	0.07	2.66	0.24	0.49	0.14	0.1	0	0.74	0	0.11	1.04
NM_002416	C-X-C motif chemokine 9 precursor	0	0.48	0.35	0.48	0	2.37	0.1	0.08	0.29	0.14	2.69	0	0.53	0	0.46	5.78	1.7	1.08	0.25	1.37	0.62	1.87	0.32	0.25	0.35	0.03	1.17	16.22	0.07	0.08	1.52	0.73	1.12	0.82	3.33	0.42	1.21	3.29	7.93	4.14	4.14	4.84	0.98	3.3	1.16	0.76	0.79	0.34
NM_001144823,NM_005848	C-myc promoter-binding protein isoform 1	0	6.91	1.54	0.34	2.09	1.51	0.21	0.82	1	10.38	17.92	1.39	2.46	3.15	0.38	3.72	0.91	2.33	0.75	0.82	1.05	1.34	1.71	0.17	0.07	0.55	0.67	2.72	1.09	0.06	1.19	1.27	4.67	1.22	3.68	3.36	11.82	3.28	16.23	5.12	6.14	2.07	1.71	4.83	2.65	1.71	2.21	3.27
NM_000567	C-reactive protein precursor	1	0	0	0	0	0	0	0	0	0	0.13	0	0.02	0	0	0	0	0	0	0	0	0	0	0	0	0	0	0	0	0	0	0	0	0	0	0.03	0	0	0	0	0.04	0	0	0	0	0	0	0
NM_001328,NM_001012614	C-terminal-binding protein 1 isoform 1	0	43.41	31.34	27.26	78.13	50.79	25	7.14	13.42	17.26	48.37	11.08	20.88	59.24	20.34	70.39	35.47	59.77	28.01	24.08	36.45	30.2	28.94	18.06	49.76	50.42	51.95	157.39	117.17	8.18	39.14	46.47	24.2	19.28	24.21	16.98	10.37	49.39	51.78	56.58	34.69	15.24	16.1	80.36	62.7	22.04	65.81	53.92
NM_001329,NM_022802,NM_001083914	C-terminal-binding protein 2 isoform 1	0	1.13	0.36	0.39	3.26	1.19	0.21	0.15	0.17	0.44	0.4	0.28	0.87	1.2	0.53	1.26	1.26	0.73	0.68	0.49	0.81	0.44	1.12	0.08	0.4	0.77	1.1	1.5	3.49	0.09	0.45	0.6	1.25	1.4	1.21	0.37	0.99	0.76	1.62	2.28	1.52	0.67	0.36	2.09	1.75	0.51	0.91	2.47
NM_016511	C-type lectin domain family 1 member A	0	0.53	0.11	1.1	1.24	0.22	0.16	0	0.09	0.25	0.14	0	0.38	1.85	0.24	2.38	0.3	0.37	0.36	0.42	0.15	0.14	1.13	0.06	0	0.31	0.05	3.68	2.46	0	0	0.35	2.92	1	0.75	0.04	1.45	2.3	0.48	4.25	1.25	1.16	0.22	0.35	1.13	0.17	1.28	1.12
NM_001099431,NM_016509	C-type lectin domain family 1 member B isoform	0	33.03	2.7	3.06	1.71	6.04	0.83	0.75	1.35	0.64	6.04	1.54	9.67	6.11	1.55	10.83	1.87	6.05	0.93	1.99	3.11	6.05	8.67	0.56	0.54	1.08	9.35	8.49	11.32	1.8	2.46	3.01	13.44	1.22	2.3	0.63	1.94	6.87	26.22	12.87	2.58	1.89	0.94	6.16	3.62	3.11	2.33	2.36
NM_006344,NM_182906	C-type lectin domain family 10 member A isoform	0	3.54	1.07	2.09	16.75	4.56	1.27	1.59	0.83	0.65	3.02	1.95	1.22	3.7	4.97	15.37	6.11	5.36	3.29	0.84	4.62	3.26	2.44	0.57	18.53	7.83	7.19	10.16	9.81	3.26	5.55	17.28	0.94	7.78	11.58	3.27	3.14	9.09	3.58	13.21	8.13	9.55	3.24	12.34	19.86	3.32	14.95	3.91
NM_002975	C-type lectin domain family 11 member A	0	4.46	1.21	1.74	5.59	3.87	6.08	9.98	1.32	4.73	3.55	8.56	3.15	7.03	2.73	5.55	2.57	2.99	2.41	2.09	8.85	2.32	10.05	2.69	6.55	8.48	2.29	3.64	8.68	6.4	5.99	3.95	7.08	2.54	0.85	2.11	2.19	1.74	2.76	3.22	5.34	2.83	2.05	1.41	2.85	1.43	2.92	2.85
NM_138337,NM_201623	C-type lectin domain family 12 member A isoform	0	24.02	3.83	105.11	41.88	75.38	21.75	4.7	34.27	4.45	11.23	5.71	73.79	133.28	47.48	57.1	32.65	102.9	19.69	11.94	11.91	80.4	177.5	1.67	10.73	15.2	9.27	76.59	127.79	18.95	20.08	79.39	55.73	59.36	68.54	10.26	8.54	41.88	15.28	264.47	33.73	34.2	21.67	63.65	56.07	31.37	87.12	94.01
NM_001129998,NM_205852	C-type lectin domain family 12 member B isoform	0	0.22	0.07	0.83	1.24	0.46	0.16	0.19	0.34	0	0.29	0.06	2.81	3.7	0.66	0.76	0.07	1.76	0.35	0.21	0.29	0.8	3.78	0	0	0.1	0.38	1.41	1.29	0.22	0.59	1.24	0.39	1.18	1.08	0.16	0.03	1.34	0.1	4.27	0.69	0.73	1.01	1.97	0.58	0.89	1.56	2.62
NM_175060	C-type lectin domain family 14 member A	1	0	0	0	0	0	0	0.02	0	0	0	0	0	0	0	0	0	0	0	0	0	0	0	0	0	0	0	0	0	0	0	0	0	0	0	0.03	0	0	0	0	0	0	0	0	0	0	0	0
NM_207390	C-type lectin domain family 17, member A	0	1.25	2.18	0.96	2.77	1.11	1.03	0	0.17	1.77	7.55	0	0.62	2.96	0.21	2.06	1.1	2.18	0.81	0.3	3.42	0.72	1.56	0.11	1.38	1.97	1.52	4.9	3.6	0.02	0.42	1.21	0.83	1.51	2	2.36	1.71	2.8	3.04	1.57	0.54	0.9	0.5	1.91	1.88	0.58	3.8	5.53
NM_001011880	C-type lectin domain family 18 member B	1	0	0	0	0	0	0	0	0	0	0	0	0.03	0	0	0	0	0	0	0	0	0	0	0	0	0	0	0	0	0	0	0	0	0	0	0	0	0	0	0	0	0	0	0	0	0	0	0
NM_001136214,NM_182619	C-type lectin domain family 18 member C	1	0	0	0.06	0	0	0	0	0	0	0	0	0	0	0	0	0	0.02	0.02	0.03	0.02	0.02	0.03	0	0	0	0	0	0	0	0.06	0	0	0	0	0	0	0	0.13	0.07	0	0	0	0	0.13	0	0	0
NM_173619	C-type lectin domain family 18 member C	1	0	0	0	0	0	0	0	0	0	0	0	0	0	0	0	0	0	0	0	0	0	0	0	0	0	0	0	0	0	0	0	0	0	0	0	0	0	0	0	0	0	0	0	0	0	0	0
NM_001130711	C-type lectin domain family 2 member A	0	0	0	0	0	0	0	0	0	0	0	0.2	0	0	0.08	0	0	0	0	0	0.03	0	0.05	0	0	0	0	1.09	0	0	0	0	0	0	0	0	0	0	0	0.14	0	0	0	0	0.26	0.04	0	0
NM_005127	C-type lectin domain family 2 member B	0	16.94	13.69	7.77	4.83	35.76	5.96	21.11	32.77	61.08	56.24	13.8	157.25	107.92	16.08	103.76	71.4	45.51	20.89	34.41	45.67	31.11	78.36	9.02	19.19	27.6	17.05	186.57	73.28	1.13	6.92	10.87	235.47	51.51	55.25	77.34	133.19	86.89	331.1	229.32	263.57	32.92	27.05	38.24	57.04	23.12	21.19	66.35
NM_013269,NM_001004419	C-type lectin domain family 2 member D isoform	0	3.52	4.29	1.8	2.95	5.79	1.07	0.53	3.98	3	12.1	0.88	6.19	14.35	2.28	8.59	3.1	11.59	4.33	1.74	2.16	6.42	4.94	0.98	2.58	2.66	2.29	16.13	6.61	0.07	2.49	4.59	4.87	4.37	29.7	6.12	6.09	15.28	10.18	12.02	5.71	2.52	1.64	18.04	11.03	9.15	14.04	9.32
NM_001080511	C-type lectin domain family 2 member L	0	0.72	0.03	0.16	0.77	0.79	0.07	0	0	0.27	0	0	0	0.56	0.16	2.6	0.28	0.19	0.12	0.16	0.85	0.03	0.04	0.18	0.14	0.06	0.23	1.33	1.46	0.09	0.25	0	0	0.22	0	0	0.13	1.36	0.44	0.2	0.49	0.09	0.03	0.36	0	0.03	0.62	0.99
NM_005752	C-type lectin domain family 3 member A	1	0	0	0	0	0	0	0	0	0	0	0	0	0	0	0	0	0	0	0	0	0	0	0	0	0	0	0	0	0	0	0	0	0	0	0	0	0	0	0	0	0	0	0	0	0	0	0
NM_194450,NM_016184,NM_194447,NM_194448	C-type lectin domain family 4 member A isoform	0	5.88	5.43	22.36	23.22	22.02	5.38	3.02	10.64	7.39	4.09	2.99	16.78	37.58	10.25	70.87	32.67	20.27	20.25	18.81	14.74	17.27	40.64	4.13	6.5	12.01	3.65	23.23	18.19	2.88	10.14	17.97	115.77	61.9	71.85	17.84	15.95	34.31	72.35	92.67	178.09	31.36	11.93	11.68	38.17	11.57	40.23	76.91
NM_203503,NM_130441	C-type lectin domain family 4 member C isoform	0	0	0.21	0	1.18	1.53	0.59	0	0	0	0	0	0.08	0.46	0.23	1.78	0.14	0.66	0.45	0	0.02	0.13	0.91	0	0.26	0	0.27	0	1.31	0	0	0	0.72	0.22	1.01	0.16	0	0.27	0	5.74	1.09	1.02	0.07	0.35	0.58	0	1.42	0.38
NM_080387	C-type lectin domain family 4 member D	0	23.99	14.17	8.58	5.79	21.38	2.67	7.42	12.57	18.24	14.56	5.65	59.18	12.31	5.09	75.05	69	11.89	5.73	14.49	6.75	11.16	47.68	1.9	3.15	5.95	7.16	30.59	28.42	0.52	4.59	7.75	306.17	23.23	33.96	19.14	52.72	17.97	951.99	112.09	172.16	17.39	17.7	4.42	17.05	5.5	7.32	82.73
NM_014358	C-type lectin domain family 4 member E	0	87.14	38.46	60.86	36.8	80.28	47.98	9.88	27.23	85.47	68.69	24.42	143.84	57.76	14.58	236.77	233.94	37.66	20.52	59.53	31.98	41.52	157.22	37.68	29.44	66.94	72.03	304.72	189.95	3.27	22.73	20.88	1014.87	164.45	99.89	58.48	170.44	80.17	1253.19	263.17	367.52	90.97	59.76	26.34	71.11	19.95	70.38	344.6
NM_173535	C-type lectin domain family 4 member F	0	0.12	0	0.02	6.09	0	0.01	0.02	0	0	0.05	0.04	0	0	0.15	0.05	0.44	0.05	0.07	0.02	0.01	0	0	0	0.55	0.12	0	0	16.9	0	0.31	0	0	0.5	0	0	0	0.24	0	0	0	0.01	0.03	0.43	0	0	0.99	0.15
NM_198492	C-type lectin domain family 4 member G	0	0	0.55	0.78	0.89	3.56	0.69	0.68	0.72	0.2	0.19	0.68	1.48	2.41	1.99	9.36	1.87	2.15	0.2	1.3	5.07	4.44	2.29	0.7	2.04	0.8	1.22	0	4.38	3.2	1.7	3.68	3.31	1.33	1.31	0.64	3.21	0.94	2.03	3.24	4.99	2.97	2.28	1.69	1.29	0.46	2.87	1.21
NM_015717	C-type lectin domain family 4 member K	1	0	0	0	0.06	0	0	0.02	0	0	0	0	0	0	0	0.05	0	0	0	0.03	0	0.02	0	0	0	0	0	0	0.09	0	0	0	0	0	0	0	0	0	0	0	0	0	0	0	0.26	0	0	0
NM_001144908,NM_001144905,NM_001144911,NM_001144904,NM_001144910,NM_001144909,NM_001144906,NM_014257,NM_001144907	C-type lectin domain family 4 member M isoform	1	0	0	0	0.06	0	0	0	0	0	0	0	0	0	0	0	0	0	0	0	0	0	0	0	0	0	0	0	0	0	0	0	0	0	0	0	0.04	0	0.13	0	0.04	0	0	0	0	0.02	0	0.04
NM_013252	C-type lectin domain family 5 member A	0	1.88	8.25	6.7	7	6.66	3.34	0.69	1.28	0.86	0.6	1.35	8.73	2.22	1.67	11.12	22.62	3.45	0.48	1.92	4.88	7.03	10.2	0.49	2.97	3	5.28	34.04	16.31	0.48	1.67	1.38	20.28	9.71	5.37	7.05	6.19	2.86	49.71	31.84	17.61	4	2.08	2.09	5.82	3.47	2.75	23.56
NM_001007033	C-type lectin domain family 6 member A	0	0	0.53	0.43	0.55	1.75	0.24	0.12	0.61	0.11	0.08	0.64	1.02	1.2	0.1	6.01	2.24	1.06	0.18	0.66	1.08	0.91	1.15	0	0.33	0.23	0.56	4.13	0.68	0.05	0.32	0.08	2.79	1.47	1.1	0.13	1.01	1.8	24.79	6.86	6.26	1.71	0.74	0.58	1.07	0.34	0.26	5.26
NM_197948,NM_022570,NM_197947,NM_197949,NM_197950,NM_197954	C-type lectin domain family 7 member A isoform	0	25.08	2.26	6.35	33.53	9.95	1.15	10.83	2.84	33.29	15.11	6.96	12.98	32.58	4.92	74.06	20.24	19.52	13.57	13.32	7.88	5.95	17.59	0.91	8.9	7.05	3.64	23.66	37.73	1.08	17.99	8.47	9.87	108.72	75.88	55.93	75.56	99.53	273.59	176.02	127.24	67.71	34.8	17.14	51.41	10.9	41.25	84.99
NM_207345	C-type lectin domain family 9 member A	0	0.19	0.45	0.19	0.46	0.6	0.19	0.02	0	0.05	0.08	0.34	0.65	1.57	0.15	1.67	0.98	0.39	0.35	0.77	0.39	0.26	0.57	0.02	0.41	0.41	0.09	1.95	0.09	0	0.12	0	1.27	1.61	1.15	0.08	0.1	0.97	2.31	2.93	1.22	0.45	0.36	0	2.69	0.22	0.99	1.24
NM_172004	C-type lectin-like domain family 1	0	2.48	2.14	0.51	0.52	3.18	1.52	0.57	2.12	7.12	8.63	0.58	11.2	16.66	2.52	11.97	2.57	4.86	1.89	0.76	2.93	6.63	7.61	1.06	2.2	5	2.3	2.01	5.67	0.12	1.62	4.05	1.86	4.73	42.15	10.18	12.14	6.44	9.13	2.57	4.37	2.42	1.76	3.37	9.45	2.75	2.58	1.69
NM_006039	C-type mannose receptor 2	0	2.36	0.26	0.15	0.41	5.96	0.21	0.07	0.15	0.86	1.73	0.22	0.16	7.13	0.09	1.33	3.26	0.31	0.21	1.51	0.18	0.12	0.21	0.2	2.49	0.28	0.24	1.6	1.59	0.05	0.32	0.33	0.4	5.45	0.25	0.23	0.26	1.64	0.41	1	0.66	0.26	0.36	2.12	7.93	0.12	2.78	0.82
NM_024409	C-type natriuretic peptide precursor	1	0	0	0	0	0	0	0	0	0	0	0	0	0	0	0	0	0	0	0	0.16	0	0	0	0	0	0	0	0	0	0	0	0	0	0	0	0.23	0	0	0	0	0	0	0	0	0	0	0
NM_152692,NM_001011551	C1GALT1-specific chaperone 1	0	2.96	6.75	4.67	3.38	7.54	3.13	0.27	7.79	1.96	8.27	0.15	14.29	6.94	3.99	22.93	8.56	8.34	4.34	4.03	2.25	13.53	11.36	1.24	2.92	4.12	3.26	23.77	11.39	0.47	1.66	6.43	32.91	11.36	45.78	5.57	8.97	15.05	103.52	41.43	51.63	7.45	4.01	10.71	12.36	9.05	7.69	14.54
NM_001101330	C1GALT1-specific chaperone 1-like	1	0	0	0	0	0	0	0	0	0	0	0	0	0	0.02	0	0	0	0	0	0	0	0	0	0	0	0	0	0	0	0	0	0	0	0	0	0	0	0	0	0	0	0	0	0	0	0	0
NM_006688	C1q-related factor precursor	0	0.22	0.02	0.03	0.07	0.14	0.02	0	0	0	0.08	0.12	0	0.46	0.05	0.14	0	0.08	0	0	0.1	0.03	0	0.07	0	0.18	0.17	0	0.11	0.03	0.09	0	0	0	0	0	0.06	0	0	0.09	0	0.03	0	0.2	0	0.05	0.14	0.04
NM_207322	C2 calcium-dependent domain-containing protein	1	0	0.02	0	0	0	0	0	0.06	0	0	0	0	0	0	0.04	0	0	0	0	0	0	0	0	0	0	0.03	0	0	0	0	0	0	0	0	0	0.02	0	0	0	0	0	0	0	0	0	0	0
NM_001007595	C2 calcium-dependent domain-containing protein	0	0.99	0	0	0	0	0.04	0	0.04	0.05	0.08	0	0	0	0.01	0	0	0.02	0.03	0	0	0.06	0.35	0	0	0.02	0	0	0.5	0	0	0	0	0	0	0	0.17	0	0	0	0.12	0.03	0	0	0	0	0	0.18
NM_001136263	C2 calcium-dependent domain-containing protein	1	0	0.03	0.04	0	0	0	0.01	0	0	0	0	0	0	0.02	0	0	0	0	0	0.02	0	0	0.01	0	0	0	0	0	0	0	0	0	0	0	0	0	0	0	0	0	0	0	0	0	0	0	0
NM_015500,NM_199050	C2 domain-containing protein 2 isoform 1	0	0.39	0.37	0.54	0.52	0.86	0.35	0.22	0.07	0.43	0.3	0.08	0.39	1.76	0.37	1.71	0.89	0.64	0.39	0.27	0.63	0.57	0.52	0.12	0.41	0.81	0.52	4.68	1.33	0.22	0.29	0.76	1.01	0.61	0.86	0.43	0.36	1.24	1.3	1.7	0.73	0.34	0.35	1.3	1.42	0.71	1.67	0.61
NM_014807	C2 domain-containing protein 2-like	0	6.46	4.31	4.16	15.12	8.99	4	0.96	2.13	4.32	3.28	2.23	3.5	7.87	3.24	9.61	3.19	7.25	4.91	3.1	7.21	6.02	7.42	2.05	6.38	10.94	7.39	21.07	12.17	2.23	4.27	4.65	3.75	4.37	4.04	2.45	6.53	7.5	4.69	9.41	3.55	3.3	3.31	10.37	7.76	3.65	14.55	6.87
NM_015531	C2 domain-containing protein 3	0	2.84	0.93	0.81	2.78	0.74	0.3	0.11	0.4	0.41	2	0.12	0.61	1.39	0.15	1.01	0.51	1.32	0.6	0.44	1.23	0.33	0.44	0.17	0.38	0.99	1.19	1.97	2.31	0.04	0.6	0.58	0.57	0.25	0.93	0.86	0.34	0.73	4.6	1.9	1.7	0.97	0.91	2.63	2.46	1.17	1.53	1.8
NM_001136003	C2CD4D	1	0	0.04	0.05	0.19	0.11	0	0.02	0.11	0.05	0.14	0.05	0.03	0	0.03	0.07	0	0.15	0.05	0	0.03	0.08	0.18	0.22	0	0.11	0	0	0	0	0.07	0.12	0	0.18	0	0.04	0.05	0	0	0	0	0	0	0	0	0	0	0
NM_015692	C3 and PZP-like alpha-2-macroglobulin	0	0.1	0.17	0.01	0.5	0.1	0.05	0.08	0.01	0.06	0.16	0.18	0.12	0.46	0.13	0.46	0.07	0.12	0.14	0.06	0.19	0.03	0.09	0.03	0.47	0.17	0.12	1.86	0.13	0.06	0.09	0.27	0.31	0.5	0.15	0.02	0.2	0.15	0.54	0.24	0.19	0.12	0.12	0.05	0.26	0.06	0.45	0.34
NM_004054	C3a anaphylatoxin chemotactic receptor	0	61.72	42.96	34.35	40.45	8.24	29.92	3.42	17.59	33.2	29.23	4.53	11.5	17.49	10.82	90.88	17.26	7.62	4.75	7.9	6.51	12.64	64.46	2.17	2.4	16.56	18.3	12.41	55.11	8.02	17.59	19.47	42.11	82.8	67.58	55.51	61.15	7.21	205.83	44.25	8.23	42.49	5.43	50.02	16.08	16.65	55.12	152.86
NM_000715	C4b-binding protein alpha chain precursor	0	1.25	0.36	9.33	5.7	3.78	0	0	2.4	0	0.11	0	0.71	2.31	0.32	0.64	3.24	2.9	0.07	0.6	2	0.77	6.3	1.3	0	0.07	1.99	3.36	0.07	0.05	1.47	0	8.99	0.25	0.2	0.18	0	0.89	86.3	14.91	2.8	0.07	0.44	2.12	0.68	1.6	0.45	0.45
NM_001017365,NM_001017366,NM_000716,NM_001017364,NM_001017367	C4b-binding protein beta chain isoform 1	0	0	0.15	0.15	0	0.36	0.06	0	0	0.4	0.33	0.25	0.23	0	0.05	0.2	0.16	0.39	0	0.1	0.05	0.23	0.04	0.02	0	0.17	0	0	1.4	0	0.34	0.19	0	0	0	0.24	0.15	1.25	0.51	1.01	0.33	0	0.08	0	0.45	0.07	0.37	0
NM_001736	C5a anaphylatoxin chemotactic receptor	0	57.55	46.09	59.59	219.84	32.35	41.75	3.08	23.72	63.17	12.28	1.08	77.01	76.82	29.54	88.15	61.66	67.45	55.63	70.7	25.59	30.03	123.08	16.72	43.28	84.57	47.98	58.32	337.12	6.28	56.62	71.92	59.91	280.98	119.53	127.92	294.62	72.51	328.56	176.14	125.02	72.59	127.53	84.39	219.89	41.48	167.74	275.32
NM_018485	C5a anaphylatoxin chemotactic receptor C5L2	0	1.23	5.23	6.85	27.93	7.51	2.73	0.06	0.78	0.55	0.29	0	2	7.68	1.64	7.79	4.9	5.93	4.09	8.22	3.71	2.39	6.91	1.28	4.18	7.25	5.55	16.62	37.06	0.36	5.59	5.28	7.72	6.27	2.77	1.26	0.33	3.98	8.15	10.55	5.07	3.66	3.84	3.32	13.94	1.44	7.01	23.87
NM_005857	CAAX prenyl protease 1 homolog	0	4.07	5.47	3.61	7.86	6.39	3.05	1.15	6.63	3.45	14.14	0.74	11.79	6.29	3.56	22.15	7.91	8.1	4.15	3.29	2.83	8.82	9.19	0.48	1.71	4.29	3.81	14.03	6.8	1.3	1.69	7	18.15	13.87	56.02	9.55	5.94	14.46	48.54	37.45	30.16	7.53	4.18	10.32	15.59	10.75	10.95	16.57
NM_005133,NM_001032279	CAAX prenyl protease 2 isoform 1	0	7.88	5.54	5.8	12.48	7.67	3.77	4.87	4.98	4.88	22.85	6.02	8.6	12.59	6.37	17.9	7.98	10.12	5.62	3.85	11.77	8.49	7.68	5.23	14.5	21.58	9.75	30.93	27.63	3.11	6.25	9.66	7.08	12.22	13.12	10.88	10.17	13.24	19.12	12.74	11.54	9.23	7.67	9.45	12.23	6.34	17.87	8.53
NM_004341	CAD protein	0	2.12	3.14	3.35	4.6	1.96	2.12	0.25	0.72	0.61	1.91	0.62	1.7	2.59	1.23	3.43	0.91	3.53	1.08	1.15	2.42	2.73	1.55	1.92	3.15	4.65	6.16	10.65	2.7	0.33	2.04	2.86	2.1	0.9	2.55	0.69	0.46	4.68	2.31	4.24	1.57	0.91	0.95	8.32	2.88	4.19	6.69	3.83
NM_001803	CAMPATH-1 antigen precursor	0	580.13	244.67	341.68	305.48	829.84	325.89	496.44	557.03	589.08	1169.93	414.75	1125.39	4376.7	603.05	963.16	727.42	1079.2	538.68	195.83	411.9	1130.06	1676.26	525.43	1097.56	1427.64	506.42	2809.07	1318.22	344.96	574.44	1236.68	649.46	964.25	2415.3	1320.38	827.69	903.72	506.18	844.12	343.46	734.38	246.97	889.45	1151.1	813.77	2035.75	383.33
NM_198240,NM_002956	CAP-Gly domain-containing linker protein 1	0	9.18	2.91	1.73	6.38	2.54	0.89	0.49	1.88	2.41	7.08	0.48	3.15	1.2	0.93	6.05	2.01	3.68	1.96	1.52	2.93	1.5	1.99	0.26	0.92	1.47	2.02	6.1	2.16	0.3	3.98	1.79	5.28	4.95	10.23	3.77	7.27	6.95	26.41	13.41	13.97	4.85	3.86	8.5	7.08	4.03	6.78	9.86
NM_003388,NM_032421	CAP-Gly domain-containing linker protein 2	0	7.28	1.1	1.49	7.86	2.47	1.16	0.82	0.35	1	4.25	0.84	0.65	0.74	1.03	2.49	1.94	2.36	0.92	0.89	4.38	0.84	1.19	0.68	2.56	2.47	4.96	8.54	12.37	1.44	2.51	2.38	0.59	1.29	0.88	1.01	1.67	4.38	3.93	2.46	1.82	1.73	1.71	4.14	2.88	1.8	4.57	4.24
NM_015526	CAP-Gly domain-containing linker protein 3	0	0.46	0.5	0.18	0.3	0.18	0.2	0.11	0.12	0.08	0.64	0.36	0.3	0	0.14	0.27	0.05	0.33	0.13	0.1	0.29	0.22	0.44	0.26	0.41	0.37	0.43	0	0.2	0.06	0.06	0.19	0.22	0.36	0.53	0.36	0.43	0.18	0.32	0.38	0.07	0.17	0.09	1.69	0.39	0.37	1.28	0.31
NM_024692	CAP-Gly domain-containing linker protein 4	0	1.83	0.57	0.25	2.95	1.28	0.23	0.36	0.66	1.88	2.66	0.44	1.22	1.85	0.78	3.29	0.33	3.15	1.4	0.49	0.55	1.2	0.87	0.1	0.66	0.81	0.75	2.35	1.72	0.12	1.49	1.15	0.11	3.66	8.22	4.28	3.88	4.71	7.42	5.14	6.65	2.72	0.95	4.78	5.66	1.44	3.8	2.02
NM_022900	CAS1 domain-containing protein 1 precursor	0	1.45	0.35	0.16	0.68	1.3	0.11	0.15	0.35	0.98	3.43	0.17	0.91	0.37	0.24	1.39	0.19	1.18	0.53	0.15	0.39	0.51	0.3	0.03	0.36	0.22	0.31	2.05	0.2	0.01	0.55	0.53	0.42	0.79	4.44	1.41	1.85	2.43	4.34	1.81	2.01	1	0.46	3.5	2.33	0.85	1.16	1.89
NM_001127184,NM_003879,NM_001127183	CASP8 and FADD-like apoptosis regulator isoform	0	109.54	39.5	59.53	75.66	60.9	31.29	15.97	28.93	46.21	73.16	22.26	51.64	44.06	12.21	105.81	91.53	36.63	17.07	39.13	43.62	38.88	53.31	16.5	30.28	48.2	51.22	186.52	123.27	10.4	36.52	33.1	247.7	123.23	107.36	48.41	168.05	81.93	589.69	201.5	155.09	36.67	58.26	52.44	69.88	43.68	71.86	189.31
NM_001137668,NM_001137667,NM_012115	CASP8-associated protein 2	0	0.6	0.45	0.09	0.52	0.84	0.09	0.01	0.31	0.35	1.07	0.04	0.45	0.46	0.16	0.87	0.37	1.47	0.45	0.19	0.22	0.51	0.66	0.03	0.05	0.34	0.05	1.45	0.31	0.02	0.27	0.31	0.24	0.32	0.79	0.31	0.24	1.39	1.11	1.9	0.25	0.14	0.08	2	0.74	0.73	1.19	0.84
NM_001111101,NM_015463	CB1 cannabinoid receptor-interacting protein 1	0	0.31	0	0.04	0.06	0.1	0.13	0.08	0.08	0	0.13	0.09	0.05	0.37	0.14	0.28	0.19	0.11	0.08	0.03	0.15	0.06	0.15	0.03	0.43	0.11	0.02	0.28	0	0	0	0.14	0.11	0.14	0.08	0.03	0.18	0.06	0.13	0.43	0.04	0	0.04	0	0.87	0.15	0.51	0.07
NM_001142397,NM_014772	CBP80/20-dependent translation initiation factor	0	4.22	0.8	0.93	5.6	1.56	0.68	0.67	0.23	0.37	1.49	3.68	0.59	1.85	0.76	2.76	2.03	1.12	0.72	0.46	1.23	1.2	1.14	0.29	2.54	1.74	1.7	5.01	3.9	0.78	0.99	1.54	0.74	1.54	1	0.76	0.75	2.1	3.14	2.01	1.94	1.4	1.3	2.32	2.46	0.75	2.13	1.36
NM_004364	CCAAT/enhancer-binding protein alpha	0	11.25	10.48	8.55	84.16	25.75	8.01	5.15	14.28	6.02	5.49	5.51	10.51	44.52	18.47	62.12	27.94	15.83	20.16	13.15	54.38	25.4	44.6	5.17	30.63	30.59	22.5	40.07	57.69	10.35	34.12	52.84	10.5	14.34	19.38	8.96	16.42	10.18	12.46	18.99	28.79	21.06	29.77	15.81	24.3	7.09	23.72	13
NM_005194	CCAAT/enhancer-binding protein beta	0	150.13	125.92	128.53	433.21	158.48	37.77	33.18	56.36	139.39	37.81	54.59	211.02	112.27	41.19	242.22	241.03	87.92	44.9	143.32	92.98	75.36	143.22	47.94	128.55	145.54	198.96	489.06	1431.09	8.26	185.98	103.99	217.32	132.12	57.05	53.76	161.08	64.28	600.53	167.85	290.96	55.73	71.95	53.72	107.05	28.01	81.59	145.03
NM_005195	CCAAT/enhancer-binding protein delta	0	151.55	76.75	139.25	348.08	167.97	38.36	8.53	52.12	71.98	13.74	13.27	45.6	30.54	43.76	212.3	229.02	99.59	35.72	64.12	31.53	82.76	132.47	44.89	61.17	89.8	147.02	551.8	749.86	20.37	74.81	82.03	116.47	86.85	35.6	10.1	52.91	42.78	219.15	120.52	61.14	31.42	29.16	35.17	49.27	18.92	57.76	82.11
NM_001805	CCAAT/enhancer-binding protein epsilon	0	0.53	6.05	5.55	6.54	7.39	19.51	0.67	3.12	3.02	0.41	1.08	6.55	13.7	1.33	6.03	10.82	4.72	1.84	6.37	13.49	9.79	52.21	5.97	5.2	7.59	4.28	8.62	10.95	2.68	1.18	3.35	18.11	4.23	1.73	0.84	7.26	2.82	2.28	8.05	1.79	0.78	1.04	1.4	7.05	1.79	8.2	4.51
NM_001806	CCAAT/enhancer-binding protein gamma	0	9.66	3.6	2.65	7.17	5.66	2.11	2.21	5.46	14.23	29.13	5.65	4.62	9.16	2.78	14.36	3.52	6.09	3.68	1.73	3.78	7.95	6.56	1.4	3.85	4.57	3.15	13.05	7.5	0.92	3.43	5.7	6.33	5.91	14.38	14.04	37.96	7.96	14.33	13.07	11.9	5.96	6.23	9.78	7.41	5.63	5.99	5.3
NM_005760	CCAAT/enhancer-binding protein zeta	0	12.26	3.39	0.67	4.02	5.16	0.82	1.14	5.82	12.52	37.83	0.62	6.7	9.53	2.41	12.75	3.8	8.15	3.22	1.58	1.41	6.15	5.62	0.65	1.04	2.64	1.62	9.65	2.49	0.12	2.73	2.86	4.91	5.3	8.35	7.65	14.64	9.96	24.73	17.45	10.45	3.71	3.84	10.44	6.89	4.71	5.5	7.43
NM_016284,NM_206999	CCR4-NOT transcription complex subunit 1 isoform	0	9.71	7.13	7.99	21.77	8.31	5.25	2.52	4.08	8.56	16.95	2.55	9.45	15.83	4.07	15.12	8.67	10.87	5.03	4.99	5.29	6.69	7.98	2.1	5.51	6.96	8.1	25.29	14.61	0.84	4.29	7.84	16.75	11.04	15.85	8.42	10.23	15.68	21.37	21.61	11.14	5.69	4.18	27.61	16.63	14.19	22.89	18.08
NM_015442	CCR4-NOT transcription complex subunit 10	0	2.75	3.84	4.28	3.91	3.9	4.29	1.15	3.56	3.39	6.95	1.09	7.07	6.94	3.05	9.29	5.27	7.09	3.39	2.79	4.69	4.32	4.84	1.76	1.71	5.45	5.43	12.19	10.34	1.51	3.09	8.3	5.77	8.42	12.99	5.89	4.68	11.1	9.35	15.42	7.75	5.14	3.13	12.49	8.83	11.4	14.89	6.38
NM_014515	CCR4-NOT transcription complex subunit 2	0	20.93	5.45	3.55	7.73	5.83	2.96	11	6.23	29.63	57.35	5.38	11.32	30.91	3.93	22.01	8.81	9.9	5.01	3.78	6.56	7.33	9	1.21	6.57	5.02	4.09	21.26	9.29	2.31	7.25	8.67	14.71	12.15	26.85	39.39	45.07	20.73	38.52	23.35	24.23	11.75	9.49	18.73	17.96	8.49	22.41	13.9
NM_014516	CCR4-NOT transcription complex subunit 3	0	13.68	9.78	15.62	29.32	12.14	11.09	1.35	1.93	6.32	17.08	1.78	5.02	9.81	4.75	14.37	11.57	12.86	5.86	8.56	16.44	6.31	8.74	5.93	11.3	18.08	23.87	50.98	42.22	2.34	8.29	9.44	14.75	11.18	5.05	3.45	5.33	14.01	21.31	24.71	9.75	5.07	7.69	20.16	13.13	9.36	19.77	19.81
NM_001190849,NM_001190850,NM_013316,NM_001190847,NM_001190848,NM_001008225	CCR4-NOT transcription complex subunit 4 isoform	0	4.14	2	2.5	6.03	3.08	1.02	0.32	0.62	3	7.51	0.45	2.19	3.52	0.53	1.76	0.68	2.36	0.9	1.17	0.96	1.53	1.98	0.32	0.69	1.5	1.52	8.54	3.69	0.3	1.1	1.15	5.37	1.9	2.67	2.4	2.66	4.25	6.34	7.08	1.94	1.14	0.96	3.91	3.11	1.63	4.82	2.74
NM_015455	CCR4-NOT transcription complex subunit 6	0	4.36	1.19	0.82	3.15	2.16	0.79	0.31	1.38	2.33	5.44	0.33	2.69	5.46	0.99	6.56	2.61	2.64	1.57	0.92	1.12	2.68	2.91	0.42	0.76	1.09	0.73	4.17	1.72	0.26	1.05	2.07	3.9	2.22	8.6	1.8	3.92	4.75	7.42	7.38	4.85	2.07	0.8	5.72	5.08	3	4.26	4.31
NM_144571	CCR4-NOT transcription complex subunit 6-like	0	9.44	2.12	0.75	1.87	2.17	0.66	1.19	2.29	27.11	32.83	1.76	5.57	6.94	1.37	5.73	1.8	4.21	2.37	1.18	1.03	2.11	3.03	0.73	1.35	1.64	0.85	7.81	3.08	0.39	3.36	3.17	5.92	3.73	15.39	16.44	36.65	8.91	45.88	7.76	7.71	3.49	3.74	8.63	6.89	3.52	11.72	6.89
NM_013354,NM_054026	CCR4-NOT transcription complex subunit 7 isoform	0	4.87	2.81	1.14	2.88	2.75	1.09	0.47	3.14	4.62	16.84	0.85	4.47	6.76	1.24	7.26	2.24	5.01	2.53	1.17	1.82	3.82	3.25	0.53	1.05	2.62	1.58	5.78	2.55	0.56	3.09	3.46	2.94	3.05	18.9	5.05	8.44	6.39	16.17	8.8	10.3	4.65	2.68	5.49	6.6	3.81	5.36	5.04
NM_004779	CCR4-NOT transcription complex subunit 8	0	19.32	10.65	7.06	20.23	12.91	4.13	3.6	8.45	31.79	64.7	3.35	21.26	26.29	4.37	28.12	15.11	19.67	10.67	7.75	8.15	10.94	19.07	1.71	4.89	8.97	7.09	49.12	22.12	1.22	13.34	14.64	23.83	15.81	41.21	34.65	58.26	28.23	109	49.36	47.74	20.45	20.02	27.46	28.66	14.93	28.79	30.04
NM_015622	CCZ1 vacuolar protein trafficking and biogenesis	1	0	0.17	0.06	0	0.22	0.05	0	0	0.24	0.33	0.05	0.08	0.37	0.11	0.37	0	0.11	0.03	0.12	0.02	0.07	0.28	0	0	0.27	0	0	0.17	0	0	0.3	0.13	0.32	0.16	0.07	0.19	0.19	0.16	0.34	0.1	0.12	0.16	0.08	0	0.04	0	0.08
NM_001159587,NM_001159588,NM_133493	CD109 antigen isoform 2 precursor	0	0.1	0.03	0.01	0.04	0	0.01	0.1	0.05	0.72	0.24	0.03	0.07	0	0.03	0.11	0.05	0.02	0.03	0.02	0.03	0.02	0.04	0.01	0.07	0.02	0.03	0	0.11	0	0.01	0.09	0.2	0.07	0.11	0.22	0.39	0.1	0.1	0.16	0.09	0.05	0.08	0.2	0	0.11	0.14	0.03
NM_139030,NM_001039490,NM_004357,NM_139029	CD151 antigen	0	64.18	13.58	28.42	30.01	24.99	18.82	26.93	19.84	20.36	24.6	33.08	16.08	47.67	29.45	107	46.15	29.51	22.29	19.12	44.89	34.63	36.19	18.1	55.49	30.2	56.96	53.37	122.05	68.87	58.09	60.6	35.6	40	43.73	27.62	25.86	41.2	66.8	35.66	91.96	73.94	50.51	48.37	60.14	18.89	46.27	40.3
NM_007053	CD160 antigen precursor	0	1.81	0.74	0.63	3.54	3.88	0.41	2.92	0.73	3.7	7.43	2.22	4.62	9.72	1.93	3.58	2.54	13.48	3.8	0.86	1.53	1.67	1.68	0.71	2.23	2.1	2.62	4.36	4.41	0.25	1.69	2.71	2.57	2.51	6.86	7.55	4.61	18.24	1.05	2.33	1.83	2.13	1.08	26.75	10.87	2.53	10.81	1.1
NM_207397	CD164 sialomucin-like 2 protein	0	0.19	0	0.05	0	0	0	0.03	0	0	0	0	0.04	0	0	0	0.12	0	0.06	0	0.23	0	0.06	0.05	0	0.24	0	0	0.11	0	0	0	0	0	0.1	0	0.05	0	0	0	0.06	0	0.05	0.1	0	0.02	0	0
NM_001627	CD166 antigen precursor	0	4.7	1.54	0.9	1.73	1.07	0.33	1.59	2.91	5.86	6.14	2.02	5.28	4.07	1.13	6.19	1.49	1.7	1.59	1.16	1.73	4.42	5.32	0.29	0.92	1.29	0.49	2.42	0.72	0.2	1	1.58	15.46	3.91	7.89	2.3	6.31	3.9	13.79	7.73	27.73	3.6	2.29	2.51	3.59	1.5	1.96	3.81
NM_020406	CD177 antigen precursor	0	29.58	305.98	120.1	57.15	45.95	81.93	1.77	19.97	1.99	4.01	0.98	192.36	10.64	6.56	25.3	177.9	7.43	2.99	34.65	30.71	112.38	88.14	18.79	3.37	8.34	185.83	64.91	315.05	0.11	9.28	30.66	18.31	79.4	3.14	66.58	131.99	7.41	733.76	34.7	66.75	5.21	19.28	15.58	5.82	55.63	4.43	47.7
NM_005582	CD180 antigen precursor	0	5.54	6.34	8.19	17.85	6.53	14.06	0.14	1.86	0.45	2.94	0.14	4.15	5.37	3.99	11.01	7.44	7.1	1.87	2.12	4.37	9.14	6.4	1.94	3.58	7.48	5.65	14.46	17.62	1.83	2.46	7.1	6.71	4.95	10.99	2.85	2.11	6.57	5.39	6.21	8.29	5.01	4.59	10.47	3.3	8.65	11.63	4.84
NM_006110	CD2 antigen cytoplasmic tail-binding protein 2	0	13.56	20.79	26.23	40.88	26.75	17.94	5.73	8.09	10.38	16.27	6.08	14.8	21.57	12.5	34.6	22.78	23.3	12.13	14.08	13.35	22.54	21.72	16.25	23.89	37.24	27.89	93.08	89.4	6.58	21.84	28.81	41.35	45.77	35.29	24.63	12.83	37.22	51.78	46.41	27.82	15.56	14.79	35.65	28.6	24.39	60.31	26.58
NM_012120	CD2-associated protein	0	3.25	0.84	0.3	2.49	1.35	0.14	0.33	1.13	2.64	10.86	0.47	2.13	1.11	0.51	2.17	1.1	2.37	1.1	0.57	0.58	0.99	0.69	0.08	0.03	0.31	0.22	2.87	2.25	0.04	0.86	0.89	2.45	2.15	7.71	2.88	5.77	7.29	25.71	11.76	6.29	3.02	1.6	4.49	4.21	1.16	1.93	2.78
NM_001144895,NM_001144896,NM_021155,NM_001144894,NM_001144893,NM_001144899,NM_001144897	CD209 antigen isoform 7	1	0	0.06	0.05	0.38	0.1	0.04	0.03	0.02	0.11	0.22	0.08	0.04	0.19	0.04	0.34	0.05	0.43	0.05	0.06	0.16	0.04	0.06	0.01	0.12	0.04	0.09	0	0.15	0.03	0.09	0.18	0	0	0.18	0.08	0.02	0.36	0.13	0.43	0.04	0.18	0.1	0.49	0.13	0.08	0.48	0.05
NM_006566	CD226 antigen precursor	0	6.55	1.24	0.6	2.1	3.06	0.31	0.2	1.75	0.77	3.07	0.04	1.68	0.28	0.67	4.48	0.61	5.6	1.29	0.61	0.95	1.5	0.8	0.33	0.47	0.95	1.22	7.15	1.48	0.06	1.9	1.92	3.05	0.57	6.42	1.86	1.36	4.43	10.88	4.29	3.22	1.49	0.46	2.96	2.94	3.05	2.58	2.03
NM_001242	CD27 antigen precursor	0	24.72	37.7	39.83	29.94	45.05	75.44	19	20.8	18.46	32.28	12.8	45.23	89.96	38.7	80.09	13.69	69.9	38.61	15.44	33.23	89.63	22.28	57	69.33	140.81	47.88	149.92	62.25	5.56	16.57	57.88	34.79	32.22	114.91	29.21	18.93	125.85	41.41	34.52	17.01	6.89	15.46	76.45	52.02	68.45	112.68	35.5
NM_001024736,NM_025240	CD276 antigen isoform a	1	0.19	0.13	0.22	0	0	0.03	0	0.14	0.02	0.59	0.03	0.09	0.37	0	0.16	0	0.05	0	0.05	0.12	0.13	0.04	0.05	0	0.02	0.49	0	0.28	0.05	0.21	0.02	0	0	0.09	0.06	0.02	0	0.1	0.11	0.1	0.09	0.08	0.62	0	0.14	0	0
NM_014880	CD302 antigen precursor	0	10.09	1.72	2.35	6.73	5.68	1.42	2.48	3.76	4.34	6.47	2.93	5.33	12.12	3.83	20.56	7.91	8.08	8.61	5.12	3.52	6.29	13.06	0.66	5.32	2.52	0.85	3.64	3.42	1.21	7.29	7.48	10.7	30.4	49.01	15.01	12.79	25.23	19.28	36.58	22.68	14.95	9.14	13.41	22.03	5.81	23.49	28.57
NM_016579,NM_001165895	CD320 antigen isoform 1 precursor	0	19.54	18.98	19.26	8.67	12.08	15.46	9.79	33.37	12.03	22.18	8.57	22.29	34.25	16.95	31.11	4.62	17.97	10.04	4.02	13.14	45.38	8.36	28.46	33.43	46.72	26.71	37.84	30.25	3.56	29.49	16.24	24.01	4.77	42.25	16.02	9.03	22.37	16.96	10.66	10.65	3.74	9.11	19.79	17.34	13.9	18.55	9.29
NM_000074	CD40 ligand	0	0.51	1.11	4.21	2.96	1.86	1.21	0.09	1.28	2.85	5.17	0.46	0.9	2.13	1.98	1.83	0.4	5.61	1.76	0.88	0.32	2.11	0.76	1.22	1.9	2.1	1.35	17.09	1.46	0.15	1.16	3.94	2.19	1.47	1.94	1.03	3.92	8.78	1.2	6.24	0.58	0.53	0.42	2.93	3.27	4.08	6.95	1.68
NM_001001391,NM_001001389,NM_000610,NM_001001392,NM_001001390	CD44 antigen isoform 4 precursor	0	139.97	56.89	48.87	59.19	44.83	21.56	41.25	41.41	160.26	162.98	61.19	90.49	60.25	24.97	175.85	73.67	39.81	30.71	33.72	44.09	45.08	62.67	9.65	27.59	34.34	62.6	75.05	41.53	11.83	54.07	70.29	174.79	85.09	179.42	113.66	232.08	83.49	586.81	185.23	387.29	113.43	69.44	62.43	97.22	73.77	108.03	105.27
NM_001778	CD48 antigen precursor	0	205.69	132.35	143.48	163.73	292.58	77.3	63.44	185.73	405.01	406.53	75.9	291.45	693.62	114.76	431.23	256.28	274.96	171.1	93.02	184.2	253.73	238.21	42.92	146.54	151.49	154.55	736.21	574.05	32.94	125.85	243.01	293.64	218.01	749.35	337.23	552.1	380.3	638.07	684.72	321.81	287.33	147.28	321.89	350.46	220.73	433.44	291.3
NM_005894	CD5 antigen-like precursor	0	3.37	0	0.07	0	0.08	0.03	0.04	0	0	1.67	0	0.04	1.2	0.07	0.14	0	0.28	0.04	0.05	0.06	0.29	0.18	0.03	0.47	0	1.11	0	0	0.04	0	0.19	0	0	0.26	0.3	0.15	0	0	0.05	0	0.14	0.05	10.19	0.23	0.08	0.09	0.03
NM_203330,NM_001127227,NM_001127225,NM_001127226,NM_203329,NM_001127223,NM_000611,NM_203331	CD59 glycoprotein preproprotein	0	14.45	11.85	13.24	6.16	17	5.89	1.57	10.2	4.9	21.18	1.83	23.87	20.64	3.08	30.33	22.71	6.45	4.04	6.92	4.2	13.05	20.11	3.89	3.91	10.64	10.19	72.71	32.63	0.67	6.05	7.82	90.32	15.16	28.37	11.35	7.42	13.44	243.94	44.96	84.24	7.45	9.03	8.94	14.78	16.62	12.91	17.73
NM_001780,NM_001040034	CD63 antigen isoform A	0	407.76	199.99	281.5	302.75	195.12	300.51	260.14	103.77	517.16	234.74	146.25	346.51	198.53	153.62	705.82	387.84	152.5	121.11	175.62	343.28	268.42	450.21	97.15	286.23	401.15	500.99	868.33	1131.41	164.25	226.37	417.67	869.22	764.02	415.84	771.39	1252.96	433.84	1398.5	989.33	712.45	487.52	411.46	351.59	409.89	341.55	564.14	407.68
NM_001252	CD70 antigen	0	2.07	2.65	3.43	0	1.33	0.92	0.22	2.31	2.04	6.28	0.72	1.3	4.35	0.76	1.83	0.4	1.71	0.25	0.76	0.84	5.28	1.32	5.25	3.23	2.3	3.2	5.9	1.88	0.08	2.18	2.66	3.36	1.33	3.58	0.89	2.53	0.76	3.33	2.21	0.58	0.2	0.38	2.19	0.81	1.91	1.13	1.09
NM_004356	CD81 antigen	0	135.44	51.7	44.05	93.9	50.47	37.69	28.34	35.53	55.78	172.87	43.55	72.25	143.92	46.29	98.87	42.67	99.51	41.65	29.88	34.41	56.96	50.38	55.84	98.99	107.6	105.69	193.07	231.71	19.35	82.01	85.6	48.51	44.59	78.34	88.12	58.55	90.72	119.18	83.33	74.5	65.44	56.22	240.26	112	87.96	176.08	53.38
NM_001024844,NM_002231	CD82 antigen isoform 2	0	72.54	36.94	33.55	106.41	20.03	11.93	5.53	6.32	63.54	76.28	7.4	14.28	19.53	4.53	23.77	17.09	21.4	10.98	27.9	20.67	10.3	28.17	13.69	25.69	28.04	56.16	59.66	53.44	2.09	42.01	18.92	17.23	27.28	9.4	58.39	62.89	26.65	200.66	44.14	101.16	23.08	61.44	27.95	41.96	14.94	29.9	110.79
NM_004233,NM_001040280	CD83 antigen isoform a	0	167.26	5.03	3.35	2.05	2.12	1.47	35.66	18.06	134.56	480.15	77.75	16.69	42.3	1.25	11.31	3.71	6.35	3.02	2.59	12.73	1.59	2.37	0.52	16.97	25.87	5.57	12.71	23.64	3.97	3.32	2.63	21.13	17.17	7.26	71.74	293.56	9.94	160.11	17.43	19.1	10.07	18.67	6.47	28.34	2.17	8.71	68.98
NM_001769	CD9 antigen	0	27.49	2.65	1.35	9.52	3.93	1.36	0.46	0.48	4.96	6.07	1.36	2.13	3.7	0.24	10.78	2.77	6.09	2.55	1.7	5.05	2.96	5.76	1.03	1.69	1.76	5.97	16.81	4.82	0.57	3.71	2.42	5	5.34	8.07	8.14	5	9	14.33	4.4	6.02	1.4	1.85	12.54	14.78	5.97	14.5	7.93
NM_001025160,NM_078481,NM_001784	CD97 antigen isoform 3 precursor	0	154.42	130.74	331.55	232.16	83.87	121.5	31.73	35.61	108.38	71.85	40.33	213.51	102.18	55.51	243.66	192.1	94.2	62.52	125.8	252.56	53.44	127.08	80.44	172.44	247.36	284.58	517.55	538.61	47.53	137.87	90.69	438.68	246.65	68.55	127.48	145.07	218.19	647.17	413.19	618.06	135.5	191.75	242.5	315.49	98.1	394.49	370.52
NM_134446,NM_134445,NM_031462,NM_001184808	CD99 antigen-like protein 2 isoform 2 precursor	0	8.7	6.59	4.82	10.87	3.8	5	2.49	2.13	2.17	9.52	2.23	2.81	7.31	2.95	10.78	3.1	7.18	4.46	3.23	3.86	7.34	5.81	2.64	5.24	7.41	8.16	12.26	11.76	3.66	7.05	10.92	2.43	5.81	9.75	4.06	1.87	9.32	8.75	8.29	5.8	4.86	3.84	18.59	8.93	4.94	18.07	6.01
NM_020239,NM_001038707	CDC42 small effector protein 1	0	121.97	84.93	92.03	158.1	114.25	60.02	18.1	38.36	100.26	153.5	23.17	115.9	167.8	42.82	229.43	149.85	135.64	63.77	66.79	69.92	81.61	149.02	26.07	65.36	115.74	80.81	354.56	287.57	12.1	79.54	111.28	177.69	192.48	200.95	158.01	172.99	186.47	432.21	311.8	209.31	97.42	95.19	165.33	192.65	111.11	233.81	267.48
NM_001038702,NM_020240	CDC42 small effector protein 2	0	60.3	14.34	11.57	21.16	22.88	6.03	4.02	18.19	80.26	176.91	5	33.17	52.11	7.48	47.12	23.51	39.9	20.61	14.17	7.17	17.32	25.45	2.65	5.74	10.21	9.47	100.25	18.28	1.03	25.37	22.83	31.26	29.5	127.82	91.83	120.48	81.01	380.69	108.31	113.51	37.79	42.38	47.49	82.43	30.45	55.69	86.7
NM_018464	CDGSH iron-sulfur domain-containing protein 1	0	0.75	1.77	1.17	1.86	1.95	1.29	0.35	3.36	0.6	0.67	0.22	4.54	2.22	1.78	7.15	0.96	3.06	1.14	1.03	0.57	3.41	1.09	1.07	2.18	1.32	0.8	7.51	4.45	0.82	0.93	2.88	3.42	1.86	13.96	1.1	0.99	3.99	2.54	7.51	2.71	1.57	0.66	2.88	2.65	3.98	4.06	2.51
NM_001008388	CDGSH iron-sulfur domain-containing protein 2	0	10.53	0.99	0.65	0.77	2.26	0.54	0.55	1.97	2.46	11.04	2.09	2.4	18.51	0.71	3.86	1.82	1.73	0.7	0.62	0.59	2.66	1.63	0.38	2.3	1.72	1.5	6.78	2.12	0.25	1.02	1.59	2.34	2.54	8.45	2.63	2.09	2.73	4.5	3.95	1.83	1.08	0.7	6.44	6.6	1.88	1.62	1.25
NM_001136498	CDGSH iron-sulfur domain-containing protein 3,	0	5.59	5.36	7.06	10.91	10.32	4.02	8.34	6.07	1.34	5.15	7.54	11.41	22.77	8.54	22.25	5.81	15.98	5.22	5.55	6.11	13.36	8.43	9.61	17.51	19.5	12.95	43.45	21.66	7.89	9.04	17.99	20.28	11.94	16	9.85	3.18	15.35	14.87	13.16	11.26	6.37	6.09	17.34	11.94	7.64	17.99	4.7
NM_001177963,NM_002431	CDK-activating kinase assembly factor MAT1	0	1.81	1.79	0.38	1.28	1.6	0.82	0.2	2.32	1.15	7.57	0.75	3.5	2.87	0.87	4.52	1.17	3.29	1.29	0.5	0.91	2.51	2.03	0.75	1.5	1.81	1.24	3.19	1.03	0.2	1.86	1.46	1.71	1.51	6.66	1.95	1.18	4.4	4.41	3.64	1.88	1	0.34	4.75	3.62	2.53	3.57	1.76
NM_001100619,NM_138375	CDK5 and ABL1 enzyme substrate 1 isoform 2	0	0.39	0.35	0.03	0.09	0.04	0.11	0.1	0.22	0.23	1.02	0.18	0.29	0.09	0.07	0.55	0.05	0.22	0.07	0.02	0.18	0.66	0.13	0.07	0.07	0.26	0.19	0.88	0	0.05	0	0.16	0.06	0	1.06	0.11	0.1	0.37	0.1	0.07	0.09	0.02	0.09	0.12	0.1	0.11	0.34	0.04
NM_031215	CDK5 and ABL1 enzyme substrate 2	0	3.81	1.79	2.13	2.1	1.22	1.23	0.44	1.37	1.77	4.5	0.22	1.83	2.96	0.7	3.72	1.82	2.94	1.22	1.13	1.18	1.77	1.55	1.13	1.05	2.02	3.11	3.38	5.67	0.23	2.22	2.82	3.44	1.11	3.88	2.65	2.74	2.86	14.2	4.52	4.58	3.17	2.7	5.49	3.24	3.63	4	2.52
NM_017774	CDK5 regulatory subunit-associated protein	0	1.45	1.22	0.63	2.81	0.62	0.79	0.29	0.31	0.65	2.35	0.37	0.96	0.83	0.49	2.01	0.65	1.56	0.58	0.36	0.57	1.14	0.75	0.37	0.21	0.8	1.34	3.21	2.64	0.26	0.87	1.19	1.65	0.82	4.27	1.58	0.75	2.25	2.28	2.43	1.12	0.68	0.68	3.32	1.68	2.22	4.28	1.5
NM_016082,NM_016408	CDK5 regulatory subunit-associated protein 1	0	6.6	4.73	3.65	6.83	5.3	3.96	3.24	3.9	9.19	15.31	1.69	8.12	19.25	3.58	12.11	4.31	8.94	3.97	2.63	6.4	8.01	7.59	3.35	8.23	8.56	7.22	14.1	15.11	1.59	4.27	10.12	8.61	7.46	18.83	13.45	6.96	13.1	11.48	11.55	7.48	6.57	5.84	13.89	8.7	9.85	16.99	6.24
NM_001011649,NM_018249	CDK5 regulatory subunit-associated protein 2	0	6.65	5.26	7.18	13.97	4.36	2.63	1.09	2.03	3	7.79	1.33	6.81	5.09	1.91	6.07	4.31	4.61	1.85	3.06	3.26	3.63	5.4	2.15	2.47	3.59	7.48	13.46	7.92	1.42	2.45	6.08	37.9	4.37	6.1	5.49	5.47	8.11	41.06	12.56	20.43	2.46	2.46	9.5	5.82	5.87	10.55	4.92
NM_176096	CDK5 regulatory subunit-associated protein 3	0	19.3	11	14.13	19.15	14.99	14.34	10.31	5.26	9.45	14.68	9.76	16.61	32.58	13.75	34	19.45	16.42	10.09	9.99	27.12	16.49	16.33	9.17	17.15	27.01	16.06	52.69	39.37	8.73	12.94	18.19	35.17	31.29	27.44	19.39	14.85	47.31	50.09	43.15	31.8	19.19	21.18	31.24	34.32	20.36	62.69	28.69
NM_017632	CDKN2A-interacting protein	0	9.9	2.4	1.53	5.73	2.89	0.78	0.29	2.94	6.38	40.28	0.24	1.58	1.67	0.66	3.66	1.38	4.81	2.05	0.72	1.05	2.14	1.99	0.33	1.02	1.24	1.65	5.8	1.85	0.05	3.06	2.4	1.4	2.76	11.76	10.82	10.55	5.99	16.74	5.88	6.05	2.72	2.19	6.31	5.24	4.02	2.95	3.52
NM_080656	CDKN2AIP N-terminal-like protein	0	3.01	2.17	1.75	1.94	1.77	0.77	0.9	3.03	2.26	4.37	0.45	2.92	1.57	1.77	5.71	1	3.68	1.41	0.64	2.07	4.02	3.3	1.69	3.6	2.36	3.02	6.8	3.88	0.5	3.29	4.6	3.59	1.68	11.98	3.33	2.46	4.65	6.18	5.83	6.14	2.42	1.3	3.66	3.98	4.04	5.25	1.77
NM_024419	CDP-diacylglycerol--glycerol-3-phosphate	0	18.48	33.98	43.48	39.51	51.17	12.76	2.52	16.82	18	9.33	1.92	63.77	19.25	10.24	84.23	87.12	21.5	8.09	32.98	28.66	25.28	43.02	11.8	16.65	28.64	33.91	191.01	141.75	1.82	18.68	20.11	188.65	40.18	21.36	24.78	30.71	53.95	409.1	117.66	153.33	26.76	37.8	17.8	34.78	22.66	33.11	58.88
NM_006319	CDP-diacylglycerol--inositol	0	105.73	21.92	47.85	75.29	63.57	27.44	13.03	15.26	23.26	92.51	38.84	33.42	126.71	18.63	93.32	80.92	46.63	26.7	35.58	32.68	29.99	40.45	18.93	77.73	67.42	61.31	180.58	103.62	12.57	27.04	45.28	92.93	94.59	44.3	24.77	16.57	70.59	97.62	77.01	55.11	26.74	25.98	93.41	114.3	26.03	106.21	84.5
NM_145039	CENPB DNA-binding domain-containing protein 1	0	0.79	1.32	0.89	3.91	1.84	0.99	0.03	0.18	0.13	0.95	0.1	0.56	0.46	0.94	2.78	1.52	2.1	0.81	0.53	0.45	1.54	2.05	0.35	0.07	1.05	1.16	4.96	4.84	0.3	0.78	1.8	1.64	1.08	1.89	0.09	0	1.61	1.52	3.17	1.18	0.71	0.44	3.52	1.2	1.37	3.06	1.25
NM_001008390,NM_001195308,NM_003663	CGG triplet repeat-binding protein 1	0	15.83	5.33	4.18	8.47	10.22	2.58	3.98	6.62	14.22	33.58	8.7	10.97	12.68	3.48	19.73	11.78	13.14	5.85	4.04	6.82	7.27	9.96	1.25	1.42	4.69	4.18	30.89	14.87	0.75	6.47	7.33	21.38	12.01	36.32	13.06	26.24	26.95	83.35	40.89	28.86	11.65	8.02	20.79	22.58	13.89	17.02	24.22
NM_148911,NM_139320	CHRNA7-FAM7A fusion protein isoform 2	1	0	0	0	0	0	0	0	0	0	0.05	0	0	0	0	0	0	0	0.01	0	0	0	0	0	0	0	0	0	0	0	0	0	0	0	0	0	0	0	0	0	0	0.04	0	0	0	0	0	0
NM_138460,NM_001037288	CKLF-like MARVEL transmembrane domain-containing	0	79.19	3.43	10.23	14.11	20.33	3.95	8.43	1.63	5.31	10.18	8.33	16.39	7.68	5.59	50.24	6.93	19.68	3.3	6.68	15.33	13.46	6.37	7.23	23.01	10.09	34.96	0	30.14	12.1	11.15	13.36	30.58	7.74	7.31	11.83	22.54	38.89	29.2	12.9	18.86	4.53	4.34	10.32	15.21	5.21	10.44	15.04
NM_181296,NM_181272,NM_181270,NM_181283,NM_181271,NM_181269,NM_052999,NM_181268	CKLF-like MARVEL transmembrane domain-containing	0	0.89	2.24	3.45	14.5	2.47	0.61	0.46	1.18	0.67	1.42	0.88	7.18	1.2	1.33	5.89	4.76	1.61	1.13	1.97	1.39	1.72	2.9	2.18	2.63	3.98	2.9	4.02	10.19	0.22	1.15	1.37	4.25	2.83	4.06	1.84	1.86	1.86	11.45	4.87	6.58	1.2	2.72	1.87	3.53	1.16	2.72	4.31
NM_144673	CKLF-like MARVEL transmembrane domain-containing	0	18.04	24.61	114.51	36.11	145.02	56.54	6.23	30.69	7.6	13.15	1.76	237.85	124.3	63.61	222.77	207.66	57.63	53.28	84.75	43.07	34.33	209.81	43.29	72.18	136.35	29.2	69.8	174.11	1.1	13.7	90.34	660.65	601.61	121.42	98.38	22.51	80.95	116.3	151.75	195.93	32.82	44.04	8.5	161.01	25.8	134.61	228.19
NM_001048251,NM_181554,NM_144601,NM_181553	CKLF-like MARVEL transmembrane domain-containing	0	21.25	19.36	36.22	41	29.23	22.69	11.59	13.63	14.3	43.98	8.26	27.86	43.5	12.82	53.79	35.61	42.08	21.9	16.79	13.76	25.17	42.42	12.22	45.53	44.97	28.58	96.07	90.53	7.18	29.28	34.85	61.6	45.09	43.14	40.63	25.34	48.87	65.73	57.63	45.62	24.44	25.36	55.78	56.78	21.66	62.55	45.33
NM_181521,NM_178818	CKLF-like MARVEL transmembrane domain-containing	0	0.43	0.3	0.14	0.18	0.2	0.16	0.12	0.14	0.12	0.11	0.14	0.31	0.46	0.17	0.68	0.33	0.24	0.2	0.18	0.21	0.18	0.52	0.05	0.16	0.24	0.18	0.26	0.26	0.1	0.35	0.33	1.23	0.5	0.44	0.27	0.41	0.3	2.25	0.72	0.91	0.39	0.45	0.16	0.71	0.17	0.14	0.34
NM_178868	CKLF-like MARVEL transmembrane domain-containing	0	0.53	0.61	0.63	0.38	0.52	0.17	0.07	0.57	0.91	2.67	0.24	0.44	0	0.19	0.48	0.16	0.32	0.29	0.36	0.25	0.44	0.47	0.28	1.04	1.03	0.17	2.18	0.94	0	0.72	1.3	0.2	0.25	0.64	1.15	1.25	1.19	3.55	0.54	1	0.8	0.81	1.45	0.65	1.05	0.71	1.77
NM_181472,NM_138410	CKLF-like MARVEL transmembrane domain-containing	0	31.08	28.33	31.9	56.33	28.19	22.47	6.68	13.04	18.28	41.55	10.01	24.4	48.31	20.2	70.52	35.66	29.18	24.78	17.44	28.63	27.61	37.53	11.32	34.81	44.2	29.17	75.97	78.71	11.63	19.18	39.93	38.34	39.64	36.59	15.63	12.6	37.71	60.21	53.81	32.47	25.39	22.71	53.84	56.32	39.55	111.37	55.04
NM_017801	CKLF-like MARVEL transmembrane domain-containing	0	46.93	21.98	17.39	37.73	34.18	7.29	2.54	15.76	36.44	69.9	3.19	36.17	35.45	8.59	71.55	41.69	29.68	23	19.47	9.28	18.93	46.64	1.5	3.72	10.23	10.1	69.53	31.17	1.12	14.1	20.62	54.52	52.55	105.94	56.4	66.87	55.83	451.71	164.31	147.32	49.63	37.38	45.88	73.92	25.78	46.67	131.88
NM_001142273,NM_015282,NM_001142274	CLIP-associating protein 1 isoform 2	0	5.3	1.84	1.92	3.59	1.7	1.26	0.47	0.46	2.31	7.6	0.6	1.44	2.31	0.61	3.15	2.33	2.16	1.13	1.11	1.39	1.06	1.44	0.54	0.78	1.29	2.72	9.58	3.66	0.16	1.7	1.38	3.27	1.83	2.72	2.81	3.04	3.56	10.78	4.9	4.16	1.46	1.65	6.75	3.72	2.61	4.2	5
NM_015097	CLIP-associating protein 2	0	1.9	0.89	0.3	1.78	1.28	0.28	0.2	1.05	2.65	4.79	0.33	1.47	1.57	0.44	3.18	0.77	1.86	0.74	0.4	0.83	1.07	1.19	0.1	0.21	0.65	0.68	2.46	0.55	0.12	0.74	1.06	2.02	1.36	5.71	1.92	3.19	3.28	4.53	4.43	2.83	1.67	0.92	4.4	3.17	1.93	2.01	2.18
NM_006279,NM_174967,NM_174971,NM_174970,NM_174966,NM_174969,NM_174965,NM_174964,NM_174963,NM_174968	CMP-N-acetylneuraminate-beta-1,4-galactoside	0	5.88	1.36	1.23	1.62	1.23	0.7	1.58	0.55	1.16	1.88	1.98	1.22	1.11	0.66	2.92	1.1	3.13	1.12	0.87	1.25	0.9	1.08	0.98	2.83	2.38	2.16	3.83	2.12	0.95	1	1.78	2.02	1.83	1.94	1.27	1.57	4.23	2.6	1.39	0.83	0.77	0.97	2.88	3.27	1.14	6.52	2.41
NM_006278	CMP-N-acetylneuraminate-beta-galactosamide-	0	11.35	10.24	17.66	42.88	21.76	5.98	2.87	4.98	10.33	7.87	3.43	10.9	12.12	3.29	29.09	21.45	12.65	5.58	13.75	6.9	8.15	19.4	5.01	10.56	13.28	11.33	25.97	47.15	3.56	5.13	13.54	62.35	21.83	9.98	11.97	19.65	20.63	118.96	22.03	33.31	5.95	8.77	9.75	15.04	6.92	18.64	20.64
NM_006927	CMP-N-acetylneuraminate-beta-galactosamide-	0	20.98	11.39	15.71	61.52	17.61	6.96	1.92	3.78	10.74	6.68	2.92	7.53	12.31	4.59	17.36	23.16	11.99	7.32	17.47	5.96	8.44	15.74	4.87	12.36	12.66	18.26	45.8	55.59	2.91	6.05	10.53	22.21	20.11	7.07	4.79	22.23	14.98	74	26.62	11.24	4.52	9.22	15.83	16.53	6.66	19.29	49.52
NM_003033,NM_173344	CMP-N-acetylneuraminate-beta-galactosamide-	0	33.8	5.17	6.42	14.55	7.25	4.17	1.74	0.99	11.72	27.41	4.59	2.58	10.46	1.83	8.33	6.88	8.52	4.49	4.48	5.14	2.4	4.65	1.79	5.65	7.26	8.57	25.78	21.48	1.26	7.13	6.29	5.13	12.22	5.13	10.62	13.56	11.15	49.14	13.95	7.08	7.49	7.33	22.65	19.22	6.48	24.03	18.86
NM_005668,NM_175052	CMP-N-acetylneuraminate-poly-alpha-2,	0	6.41	1.54	1.85	9.99	3.6	1.01	3.4	2.79	7.96	6.33	1.28	5.83	7.13	2.11	13.95	5.11	5.66	2.87	2.61	2.25	3.21	5.22	0.47	2.58	3.56	2.18	9.03	7.63	0.48	3.09	3.52	8.27	10.9	14.77	6.44	12.07	12.27	20.67	25.36	11.53	5.19	4.59	8.63	8.8	3.63	6.58	12.64
NM_006416,NM_001168398	CMP-sialic acid transporter isoform a	0	1.64	4.18	1.2	3.95	8.27	1.12	0.42	5.29	1.86	2.69	0.44	7.82	11.48	3.06	20.72	6.27	8.79	6.75	3.29	2.52	9.77	18.94	0.46	2.28	3.76	2.36	11.04	4.27	0.71	1.79	5.25	14.69	9.46	25.39	2.44	4.6	15.4	20.77	25.28	11.05	4.35	1.47	11.34	13.13	5.53	6.69	7.02
NM_139018	CMRF35-like molecule 1 precursor	0	19.61	40.05	52.71	53.1	38.27	15.97	5.13	9.6	2.02	10.91	3.55	52.45	43.87	21.54	72.7	47.83	27.75	21.56	28.88	36.85	24.74	48.45	11.12	28.33	52.62	28.34	175.29	226.06	8.12	20.95	37.35	216.73	60.25	33.35	25.13	10.02	63.19	217.91	137.12	131.9	67	44.69	35.28	56.49	30.14	91.32	50.49
NM_181449	CMRF35-like molecule 2 precursor	0	96.65	4.07	20.69	165.97	26.58	14.75	15.4	2.44	12.48	30.16	27.26	7.75	38.32	17.76	56.43	28.52	14.57	23.28	11.76	39.12	17.05	26.05	4.24	35.94	21.64	35.33	28.05	519.04	11.7	45.11	43.56	19.12	56.31	21.73	34.38	8	48.72	67.85	91.22	78.33	63.73	40.22	52.8	64.15	30.58	123.54	68.38
NM_001115152	CMRF35-like molecule 4 precursor	0	0.48	1.42	0.57	0	0.31	0.05	0	0	0.14	0.57	0	0.24	0	0.06	1.21	0.56	0.87	0.21	0.42	0.14	0.27	0.86	0	0	0.47	1.09	3.53	0	0	1	0	1.84	0	0	0	0	0.91	3.01	2.33	3.47	0.47	0.8	0.71	0.78	0.12	0.31	0.22
NM_006678	CMRF35-like molecule 6 precursor	0	7.23	1.41	15.96	35.8	8.64	6.88	3.82	2.5	0.46	3.69	3.93	3.59	8.24	11.54	15	6.79	5.11	7.55	6.94	12.33	7.46	7.78	3.42	20.81	12.14	12.61	14.2	55.05	6.29	11.4	18.97	5.3	14.19	4.69	4.57	4.17	15.37	13.44	23.46	20.86	14.35	16.45	10.37	21.71	3.53	25.59	9.11
NM_174892	CMRF35-like molecule 7	0	3.42	1.33	7.95	54.62	5.27	5.89	5.97	1.34	2.89	0.81	3.33	1.73	11.48	6.04	22.41	8.95	8.46	7.71	6.74	4.19	4.22	7.69	2.07	18.84	12.96	3.71	15.21	64.23	6	3.36	13.54	4.63	36.27	10.94	3.37	4.93	14.93	6.98	19.08	7.99	9.54	7.31	4.73	21.09	2.93	34.64	18.92
NM_007261	CMRF35-like molecule 8	0	26.91	77.66	133.46	156.38	100.47	64.74	7.66	24.17	19.67	16.3	8.6	91.69	61.09	51.74	202.05	109.3	124.92	53.2	78.33	78.36	59.62	133.73	37.66	76.42	112.2	104.75	517.25	701.18	26.49	61.11	113.33	161.18	150.19	81.97	44.97	33.81	131.96	232.81	257.52	178.68	107.6	71.85	129.88	162.24	79.45	167.43	114.92
NM_001168324,NM_001168323,NM_001168322,NM_145273	CMRF35-like molecule 9 isoform 2 precursor	1	0	0.03	0.03	0	0	0	0	0	0	0	0.1	0.01	0	0	0	0	0	0	0	0	0	0	0	0	0	0	0	0	0	0	0	0	0	0	0	0	0	0	0	0	0.01	0	0	0	0	0	0
NM_006382	CMT1A duplicated region transcript 1 protein	1	0	0	0.02	0	0	0	0	0	0	0	0	0	0	0	0	0	0	0	0	0	0	0	0	0	0	0	0	0	0	0	0.05	0	0	0	0	0	0	0	0	0.03	0	0	0	0	0	0	0
NM_001190790	CMT1A duplicated region transcript 15	1	0	0	0	0	0	0	0	0	0	0	0	0	0	0	0	0	0	0	0	0	0	0	0	0	0	0	0	0	0	0	0	0	0	0	0	0	0	0	0	0	0	0	0	0	0	0	0
NM_001007530	CMT1A duplicated region transcript 15 protein	1	0	0	0	0	0	0	0	0	0	0	0	0	0	0	0	0	0	0	0	0	0	0	0	0	0	0	0	0	0	0	0	0	0	0	0	0	0	0	0	0	0	0	0	0	0	0	0
NM_173622	CMT1A duplicated region transcript 4 protein	0	0.51	1.35	0.87	1.51	1.37	0.67	0.1	1.04	0.46	1	0.52	2.09	4.72	0.6	2.56	0.37	1.65	1.13	0.43	0.84	2.53	2.2	0.42	1.33	1.8	1.37	2.22	0.7	0.13	0.8	1.4	1.43	0.82	4.71	0.6	0.52	2.95	1.11	0.85	0.76	0.57	0.52	5.9	1.62	1.57	2.89	1.46
NM_001145356,NM_001145355,NM_018491	COBW domain-containing protein 1 isoform 3	0	2.24	0.45	0.34	0.55	1.11	0.16	0.6	1.05	0.49	2.32	0.31	2.32	1.85	0.46	1.6	0.21	0.63	0.27	0.5	0.68	2.12	2.12	0.04	0.29	0.93	0.22	0.47	1.2	0.17	0.39	0.57	1.69	0.5	1.39	0.67	0.94	0.64	1.05	1.94	2.12	0.76	0.4	1	1.1	0.35	0.34	0.5
NM_172003	COBW domain-containing protein 2	0	0.17	0.17	0.02	0.18	0.11	0.04	0.02	0.27	0.1	0.41	0	0.36	0	0.07	0.8	0.49	0.19	0.21	0	0.14	0.55	0.36	0.02	0	0.08	0.36	0	0.76	0	0	0.12	0	0.32	0.73	0.15	0.09	0.76	0.32	0.62	0.54	0.1	0.14	0.16	0.13	0.1	0.34	0.31
NM_001024916	COBW domain-containing protein 5	1	0	0	0.03	0	0	0.02	0	0	0.05	0.16	0	0.07	0	0.03	0	0	0.02	0	0	0.12	0	0.12	0	0	0	0	0	0	0	0	0	0	0	0.1	0	0.05	0.22	0	0	0.22	0.05	0	0	0	0.02	0	0.14
NM_001085457	COBW domain-containing protein 6	0	0	0.16	0.05	0	0	0	0.02	0.15	0.36	0.22	0	0.09	0.74	0.06	0.52	0.12	0.11	0.05	0.03	0.19	0.1	0.18	0	0	0	0	0	0	0	0	0.12	0.55	0.18	0.35	0.12	0.3	0.07	0.32	0.22	0.15	0.2	0.05	0.08	0	0.04	0	0.16
NM_152516	COMM domain-containing protein 1	0	22.45	18.08	14.32	24.07	19.25	22.85	13.52	15.83	11.07	26.39	8.65	28.9	46.28	19.29	50.91	17.49	22.39	12.66	9	13.07	34.11	25.13	11.1	19.98	27.27	16.47	40.22	27.9	8.33	12.28	37.01	31.22	30.68	92.78	16.9	6.01	33.07	25.55	38.33	34.26	15.97	11.61	34.12	28.05	26.51	40.94	14.52
NM_016144	COMM domain-containing protein 10	0	3.52	2.19	1.57	1.94	4.95	0.79	0.96	4.02	2.24	13.29	0.65	6.61	4.17	2.29	14.5	2.8	6.69	3.68	1.58	1.51	4.11	4.02	0.54	0.6	1.47	1.94	5.37	6.15	0.22	2.62	4.53	3.82	6.74	26.58	4.54	1.98	11.54	19.94	18.01	14.06	6.67	3.47	11.91	11.39	6.84	7.77	8.96
NM_016094	COMM domain-containing protein 2	0	2.53	1.49	0.68	2.98	2.66	0.51	0.27	2.05	1.74	9.48	0.45	2.57	3.24	0.89	5.71	1.96	3.64	1.82	0.9	1.05	2.25	2.67	0.16	1.26	1.52	1.39	4.56	1.57	0.28	2.67	2.47	1.78	2.33	10.54	3.07	0.92	4.81	13.09	7.4	6.46	3.08	1.96	4.37	4.59	2.74	3.55	4.56
NM_012071	COMM domain-containing protein 3	0	8.62	21.71	10.01	8.43	30.06	13.13	4.26	29.8	8.06	12.91	4.25	39.08	48.13	21.33	87.34	21.01	25.4	14.82	8.14	15.59	57.6	39.13	10.23	15.42	27.74	17.46	90.6	21.51	4.47	10.2	37.42	33.28	37.06	154.73	15.65	10.41	44.42	39.09	61.09	38.11	16.5	6.79	31.52	30.9	23.79	26.07	20.14
NM_017828	COMM domain-containing protein 4	0	16.29	12.51	15.85	17.26	13.75	9.46	12.57	13.65	7.87	22.52	12.23	18.28	15.73	15.27	29.25	12.71	24.09	13.66	9.49	9.67	20.49	18.18	20.41	27.83	28.61	23.6	43.77	60.33	8.45	15.6	26.07	28.7	19.79	23.65	13.98	2.87	24.25	17.63	23.44	12.97	8.51	11.8	42.38	22.97	19.4	44.03	13.37
NM_014066,NM_001081004,NM_001081003	COMM domain-containing protein 5	0	10.53	5.59	6.41	14.56	11.19	5.35	2.68	3.51	3.4	14.09	3.13	10.52	13.14	6.13	18.52	9.16	10.08	5.46	5.72	6.26	10.38	10.2	4.34	8.8	17.32	11.22	44.43	43.12	2.29	4.54	9.89	12.65	7.99	10.79	4.38	3.05	8.48	22.7	15.96	8.22	5.41	4.78	12.05	13.17	7.7	16.2	12.03
NM_203495,NM_203497	COMM domain-containing protein 6 isoform b	0	22.21	13.04	7.31	1.8	26.92	5	17.26	22.95	50.8	67.8	15.22	52.48	105.61	17.91	62.96	29.13	38.32	18.85	11.02	20.94	37.37	35.57	10.85	36.37	39.65	20.9	109.4	28.24	5.49	7.95	22.31	76.51	23.12	102.93	52.75	58.94	39.12	61.67	50.68	52.57	21.59	10.17	40.9	35.94	21.47	22.18	25.79
NM_053041,NM_001099339	COMM domain-containing protein 7 isoform 1	0	19.68	11.68	10.8	16.39	14.03	10.16	12.11	13.57	5.2	26.92	8.16	21.89	46.56	12.39	40.65	21.64	22.25	13.96	7.24	18.15	19.66	19.55	7.09	14.81	21.3	14.65	39.34	36.27	7.47	14.91	26.1	18.7	15.05	40.89	23.52	8.46	23.74	28.73	28.58	35.8	20.01	15.72	29.2	25.75	18.79	46.55	16.01
NM_017845	COMM domain-containing protein 8	0	4.46	3.52	1.44	1.96	5.58	0.73	0.8	7.4	2.14	14.25	1.19	10.93	3.7	4.3	19.11	5.25	8.87	5.94	3.57	2.55	6.88	6.39	0.52	0.86	3.24	2.04	16.62	4.34	0.47	3.74	7.15	3.7	10.22	54.33	12.85	7.96	17.97	61.16	37.18	51.38	15.98	7.46	15.86	13.3	9.64	4.96	10.9
NM_014186,NM_001101653	COMM domain-containing protein 9 isoform 1	0	10.12	5.42	10.27	19.12	16.19	7.74	10.06	6.65	8.58	17.54	10.66	9.74	26.38	11.55	45.63	15.23	13.58	9.39	6.4	12.12	14.82	14.2	4.6	11.49	22.64	9.92	20.37	28.35	10.36	13.28	23.7	12.58	21.94	34.8	18.09	8.57	23.25	17.82	28.04	26.72	22.3	12.15	17.22	20.8	16.32	35.91	11.95
NM_004127,NM_212492	COP9 signalosome complex subunit 1 isoform 2	0	38.98	18.54	22.85	35.54	20.17	17.3	19.53	16.86	18.45	37.08	28.14	18.12	64.88	17.23	48.14	23.9	32.69	17.08	12.89	28.28	24.25	16.62	23.89	52.12	52.35	33.3	75.3	59.78	19.45	26.35	34.04	14.91	21.54	22.2	25.35	20.33	41.18	27.96	33.97	28.48	19.17	20.47	62.7	48.69	21.86	52.91	23.64
NM_004236,NM_001143887	COP9 signalosome complex subunit 2 isoform 1	0	12.36	3.28	1.11	1.43	4.67	0.78	4.52	9.02	13.72	33.34	5.25	8.39	8.79	2.25	12.06	4.38	6.88	3.72	1.81	3.59	8.15	5.57	0.71	2.37	3.05	1.33	6.65	2.64	0.75	3.84	4.88	5.24	5.77	41.48	19.62	42.8	11.07	49.49	18.95	22.9	9.53	6.93	10.57	10.51	6.62	4.85	6.35
NM_003653	COP9 signalosome complex subunit 3	0	69.81	14.8	11.51	9.88	22.93	9.13	11.88	20.55	38.53	118.62	11.02	26.16	89.5	8.55	45.59	41.51	24.26	11.39	13.51	11.72	21.92	23.62	5.14	21.14	12.96	9.88	34.1	11.49	2.85	16.68	23.21	21.27	42.3	71.32	37.89	63.12	36.61	38.81	53.72	39.32	23.33	17.22	51.34	45.52	31.93	44.85	21.55
NM_016129	COP9 signalosome complex subunit 4	0	8.96	9.95	3.63	4.81	9.11	4.26	3.27	10.15	7.1	33.92	3.63	19.81	21.84	10.14	39.4	11.78	16.65	7.52	4.43	4.85	17.28	15.33	2.07	2.58	5.85	6.85	15.66	5.74	1.38	7.21	16.67	16.38	18.85	68.32	17.51	9.15	26.29	39	34.48	22.66	12.51	8.57	24.93	19.7	21.41	19.97	11.47
NM_006837	COP9 signalosome complex subunit 5	0	9.49	16.36	11.1	12.95	22.64	10.8	5.26	16.81	14.96	24.71	4.27	26.34	17.31	14.3	67.33	29.27	27.39	12.91	12.91	15.68	30.85	28.81	5.46	16.58	18.65	15.21	84.03	44.41	2.61	7.87	28.61	42.66	32.44	72.03	14.75	16.51	36.56	77.01	80.05	46.31	17.77	9.33	37.12	28.21	34.53	38.95	30.61
NM_006833	COP9 signalosome complex subunit 6	0	30.4	28.38	28.69	37.31	29.45	29.48	21.94	21.74	8.84	34.12	15.8	33.87	51.37	24.83	71.57	31.43	38.23	18.59	15.73	28.77	44.14	29.56	20.86	48.66	53.15	41.16	92.44	95.18	20.17	31.13	64.37	57.33	63.3	106.1	39.73	18.82	74.95	57.77	67.87	54.88	42.66	30.24	71.41	60.85	59.03	118.58	36.32
NM_001164094,NM_016319,NM_001164095,NM_001164093	COP9 signalosome complex subunit 7a	0	11.08	9.43	11.19	24.5	12.67	9.28	0.77	3.51	2.48	8.75	1.1	7.2	8.7	5.68	26.95	7.63	14.88	7.43	8.34	11.68	10.61	11.23	4	8.78	18.47	17.65	39.96	33.5	2.38	9.03	18.6	16.38	10.72	12.91	4.29	1.6	15.46	23.3	27.11	20.84	12.97	6.89	21.84	17.76	13.08	24.08	15.27
NM_022730	COP9 signalosome complex subunit 7b	0	9.66	8.35	6.66	10.8	9.07	4.97	1.79	3.05	5.2	20.46	2.26	4.24	13.7	3.93	15.97	7.21	12.66	6.72	4	6.34	7.41	5.57	3.83	9.92	10.81	12.63	34.06	23.73	1.2	6.63	9.75	6.82	8.03	8.71	6.77	3.34	16.45	11.98	13.48	7.37	6.57	6.53	21.48	13.75	13.06	25.76	10.82
NM_006710,NM_198189	COP9 signalosome complex subunit 8 isoform 1	0	5.54	2.94	1.61	2.24	3.81	1.32	1.16	5.63	3.62	12.18	1.37	7.29	8.79	1.49	8.79	1.63	4.84	2.28	0.62	2.23	5.91	4.8	1	3.51	3.83	2.17	14.16	4.32	0.13	2.13	4.33	3.77	3.87	26.1	6.69	4.65	6.33	11.29	9	10.66	4.08	2.36	6.79	6.24	6.21	5.56	4.02
NM_005654	COUP transcription factor 1	1	0.1	0	0	0	0	0	0.01	0	0	0	0	0	0	0	0	0	0	0	0	0	0	0	0	0	0	0	0	0.15	0	0.06	0	0	0	0	0	0	0	0	0	0	0	0	0	0	0	0	0
NM_001145155,NM_021005,NM_001145156,NM_001145157	COUP transcription factor 2 isoform b	1	0	0	0	0	0	0	0.01	0	0	0.03	0	0	0	0.02	0	0	0.01	0	0	0	0	0	0	0	0	0	0	0	0	0	0	0	0	0	0	0	0	0	0	0	0	0	0.07	0	0	0	0
NM_182523	COX assembly mitochondrial protein homolog	0	10.07	6.87	5.35	6.04	12.29	4.03	3.04	11.6	22.89	37.16	3.74	18.74	22.21	6.21	25.6	8.7	13.45	6.2	3.43	6.95	15.04	14.27	3.81	16.44	10.79	10.18	28.43	21.59	1.49	4.34	12.24	9.49	7.67	46.47	26.12	20.86	22.27	19.91	18.57	17.5	3.78	2.14	50.76	13.23	7.75	13.84	6.19
NM_001184771,NM_033048	CPX chromosomal region candidate gene 1 protein	1	0	0	0	0	0	0	0	0	0	0	0	0	0	0	0	0	0	0	0	0	0	0	0	0	0	0	0	0	0	0	0	0	0	0	0	0	0	0	0	0	0	0	0	0	0	0	0
NM_004380,NM_001079846	CREB-binding protein isoform a	0	25.95	2.79	5.49	23.78	4.93	2.31	1.25	1.21	6.02	18.92	1.49	4.52	4.44	1.64	7.4	7.46	4.35	2.89	3.42	4.89	2.01	3.82	0.86	3.73	6.6	6.66	16.43	18.12	0.57	4.48	2.96	8.51	8.06	9.3	6.91	10.38	7.96	27.46	16.25	10.38	4.23	5.48	10.83	11.91	3.32	10.04	23.24
NM_015321,NM_001098482	CREB-regulated transcription coactivator 1	0	1.16	1.05	1.23	3.18	2.02	0.93	0.43	0.12	0.84	1.8	0.53	0.59	4.07	1.14	3.27	1.35	2.54	1.41	1.25	1.62	1.34	1.34	1	3.47	3.28	3.08	9.16	6.24	1.64	0.94	2.35	0.92	0.9	1.19	1.47	0.59	2.56	1.24	1.94	0.75	0.37	0.77	3.27	2.91	0.78	3.12	1.98
NM_181715	CREB-regulated transcription coactivator 2	0	83.84	14.02	20.16	52.15	23.55	13.31	7.59	9.41	86.93	68.04	15.57	11.93	40.35	8.08	31.04	25.98	23.71	15.73	18.08	25.22	11.1	17.47	8.94	35.07	43.29	32.59	99.43	96.34	5.27	28.57	22.33	20.06	31.29	26.33	54.56	128.62	32.4	134.3	38.66	40.3	30.9	50.72	38.32	45.68	19.33	63.97	54.51
NM_001042574,NM_022769	CREB-regulated transcription coactivator 3	0	15.59	5.68	5.25	12.3	6.08	3.02	1.35	2.64	16.17	32.69	1.37	5.26	12.22	2.59	11.39	5.9	10.31	4.97	2.57	5.5	4.48	3.41	1.4	5	6.68	7.17	26.7	13.39	1.17	8.05	5.85	6.55	4.05	13.03	11.99	14.87	10.58	24.95	8.76	7.93	6.71	7.05	21.69	14.85	9.07	16.31	15.75
NM_001039618	CREB/ATF bZIP transcription factor	0	2.24	0.94	0.14	1.12	1.51	0.11	0.26	0.71	3.16	4.58	0.53	1.81	2.59	0.56	2.35	0.98	3.4	1.74	0.57	2.09	1.13	1.55	0.09	0.93	0.93	0.69	3.89	1.09	0.1	1.72	0.84	1.31	1.11	5.35	2.56	5.33	7.27	10.56	5.92	4.67	1.64	0.97	6.24	4.76	1.86	3.01	3.92
NM_025099	CST complex subunit CTC1	0	4.22	3.94	3.01	7.95	3.17	2.31	0.99	0.73	2.09	9.4	0.95	2.7	10	2.29	6.33	2.8	5.89	3.38	2.49	5.01	2.93	2.68	1.41	3.98	6.08	4.25	18.1	7.68	0.83	4.15	4.74	5.19	5.38	5.42	5.57	3.34	9.84	10.27	7.86	4.91	3.83	3.54	12.49	9.54	3.81	15.66	9.52
NM_024928	CST complex subunit STN1	0	1.49	3.48	3.46	1.23	3.91	1.23	0.52	1.64	0.87	1.69	0.58	3.77	7.96	1.51	10.48	6.04	3.36	2.44	5.15	2.74	3.85	5.2	0.97	3.51	3.09	3.52	18.44	3.53	0.88	1.18	3.67	13.55	3.84	4.26	1.32	2.83	9.09	16.65	18.75	9.72	2.87	2.36	4.19	7.34	3.08	6.18	6.38
NM_001113324	CST complex subunit TEN1	0	17.37	6.33	6.8	7.25	14.42	5.1	26.88	9.86	28.92	49.43	23.69	15.35	52.48	12.52	34.97	10.73	12.49	11.18	9.48	11.11	18.76	17.83	11.31	25.18	28.46	12.07	29.01	31.21	10.99	18.4	22.37	15.74	25.06	31.42	38.43	23.19	23.97	30.85	19.4	20.72	11.08	16.31	21.56	24.13	9.81	24.2	19.9
NM_001008747	CTAGE6-like	1	0	0	0	0	0	0	0	0	0	0	0	0	0	0	0	0	0	0	0	0	0	0	0	0	0	0	0	0	0	0	0	0	0	0	0	0	0	0	0	0	0	0	0	0	0	0	0
NM_018017	CTCL tumor antigen L14-2	0	2.34	0.34	0.07	0.6	0.25	0.11	0.28	0.35	0.96	3.04	0.06	0.85	0.28	0.19	0.8	0.23	0.64	0.33	0.18	0.47	0.32	0.36	0.01	0.1	0.2	0.14	1.07	0.15	0.01	0.65	0.05	0.57	0.61	2.18	1.57	2.18	1.07	16.04	2.1	5.71	1.75	1.13	1	1.68	0.45	0.57	1.83
NM_016396	CTD small phosphatase-like protein 2	0	3.01	0.5	0.21	1.54	0.74	0.09	0.25	0.88	2.82	9.43	0.13	0.83	1.2	0.24	1.73	0.23	1.84	0.67	0.2	0.38	0.68	0.73	0.08	0.43	0.33	0.27	2.85	0.96	0.04	1	0.69	0.97	1.29	4.08	3.23	2.63	2.44	5.04	2.48	1.92	0.98	0.96	3.07	2.36	1.49	2.58	1.39
NM_005808,NM_001008392	CTD small phosphatase-like protein isoform 2	0	8.43	0.5	0.85	2.03	2.17	0.95	0.7	0.13	0.38	2.51	1.05	1.04	1.94	0.35	5.23	0.93	2.5	0.41	0.59	1.68	0.87	1.64	0.16	0.86	0.55	1.36	2.14	2.12	1.12	0.63	0.73	5.63	1	2.73	0.57	0.98	3.64	6.18	2.21	2.5	0.6	0.72	1.58	2.39	0.79	3.26	2.96
NM_001905	CTP synthase 1	0	3.93	3.55	2.08	2.52	2.96	2.13	0.87	2.98	6.48	15.31	1.28	3.15	4.72	1.18	6.56	1.24	5.55	1.48	1.21	1.4	3.66	2.25	1.28	2.56	2.51	2.82	9.54	1.22	0.35	3.5	3	5.41	3.01	9.48	8.46	4.39	6.86	6.91	7.75	3.7	2.12	2.77	10.47	2.81	7.45	6.87	3.81
NM_175859,NM_019857,NM_001144002	CTP synthase 2	0	0.36	0.32	0.18	0.26	0.14	0.22	0.12	0.51	0.52	0.57	0.24	0.75	2.41	0.35	1.55	0.84	0.51	0.33	0.14	0.45	0.7	0.67	0.21	0.48	0.34	0.35	0.43	0.39	0.11	0.33	0.45	0.39	0	1.85	0.61	0.3	0.89	0.57	0.76	0.46	0.32	0.1	1.35	0.74	0.46	1.25	0.46
NM_018704	CTTNBP2 N-terminal-like protein	0	0.48	0.06	0.04	1.05	0.1	0.06	0.04	0	0.25	0.25	0	0.08	0.37	0.06	0.55	0.02	0.14	0.09	0.05	0.04	0.18	0.14	0	0.12	0.05	0.08	0.98	0.04	0.02	0.06	0.33	0	0.14	0.2	0.25	0.53	0.13	0.22	0.71	0.06	0.13	0.07	0.46	0.1	0.13	0.45	0.11
NM_033225	CUB and sushi domain-containing protein 1	1	0	0	0.01	0	0.04	0	0	0.01	0	0.02	0	0.01	0.09	0	0	0	0.04	0	0	0	0	0	0	0	0	0	0	0	0	0	0	0	0.07	0.01	0	0	0.01	0.03	0	0.01	0	0	0.02	0	0	0.06	0.05
NM_052896	CUB and sushi domain-containing protein 2	1	0	0	0	0	0	0	0	0.01	0	0	0.01	0.01	0	0	0	0	0	0	0	0	0	0	0	0	0	0	0	0	0	0	0.01	0	0	0.01	0.02	0.01	0	0	0.02	0	0	0	0	0.03	0	0	0
NM_198123,NM_198124,NM_052900	CUB and sushi domain-containing protein 3	1	0	0	0	0	0	0	0	0	0	0.02	0.02	0	0	0	0	0	0	0	0	0	0.01	0	0	0	0	0	0	0	0	0	0	0	0	0	0.01	0	0	0	0	0	0	0	0	0	0	0	0
NM_022034	CUB and zona pellucida-like domain-containing	0	0	0.15	0.07	0	0.08	0.07	0.04	0.13	0.46	0.38	0.04	0.32	0.28	0.12	0.25	0	0.7	0.13	0.03	0.04	0.25	0.44	0	0	0.34	0.24	1.3	0	0	0.03	0.33	0	0	0.06	0.09	0.15	0.25	0	0	0.16	0.1	0.04	0.2	0.32	0.12	0.28	0.22
NM_022842,NM_178181	CUB domain-containing protein 1 isoform 1	0	0	0.41	0.46	0.35	0.07	0.22	0.04	0.31	0.37	0.13	0.05	0.61	0.56	0.16	0.94	0.21	1.02	0.05	0.18	0.68	0.6	0.25	0.07	0.12	0.15	0.68	1.58	0.7	0.29	0.36	0.18	0.2	0.14	0.79	0.13	0.11	0.31	0.22	2.1	0.52	0.66	0.08	1.04	0.84	0.49	0.17	0.34
NM_201546	CUB domain-containing protein 2 precursor	1	0	0	0	0	0	0	0	0	0	0.05	0.1	0	0	0	0.04	0	0.04	0	0	0	0	0	0	0	0	0	0	0	0	0	0	0	0.11	0	0.02	0	0	0	0	0	0.01	0	0	0	0	0	0
NM_017949	CUE domain-containing protein 1	0	4.58	0.88	1.06	9.84	1.75	0.53	0.86	0.52	0.89	1.3	0.89	0.21	2.41	1.29	4.13	1.56	1.63	4.09	3.68	0.67	1.27	3.44	0.52	2.52	2.88	1.12	2.59	7.2	0.83	2.31	4.68	1.4	5.05	2.37	1.19	0.24	2.65	1.87	2.24	1.55	1.84	2.87	3.42	3.75	0.63	5.13	5.79
NM_024040	CUE domain-containing protein 2	0	18.6	24.99	28.26	46.89	27.97	24.65	23.48	19.63	15.77	22.79	24.25	29.45	46.83	21.44	65	24.14	34.45	17.23	17.78	29.78	36.01	26.51	24.66	50.06	52.43	43.13	101.21	90.62	23.8	29.02	53.05	43.5	44.81	59.2	30.19	16.45	56.15	53.04	58.88	47.81	30.75	25.61	48.92	44.22	36.56	85.81	27.96
NM_001172639,NM_198700,NM_001172640,NM_006560,NM_001025596	CUGBP Elav-like family member 1 isoform 4	0	18.96	4.83	3.81	10.9	9.48	2.86	3.41	1.52	6.59	8.36	1.69	4.04	7.5	1.52	7.67	4.71	5.93	3.51	2.39	4.11	3.63	5.28	1.01	2.44	4.87	5.38	21.93	8.18	0.93	6.43	3.85	9.4	10.68	11.92	9.72	18.56	9.45	24.22	14.05	9.88	5.64	5.35	13.13	10.48	7.3	19.21	15.55
NM_001025077,NM_006561,NM_001025076,NM_001083591	CUGBP Elav-like family member 2 isoform 3	0	16.09	7.16	9.89	17.63	13.81	5.55	1.08	5.02	8	9.05	1.21	11.82	16.38	3.81	24.3	13.9	15.65	7.73	6.67	7.05	5.71	10.72	2.43	4.89	8.64	7.87	29.71	14.29	0.71	8.95	9.26	17.23	20.25	29.8	12.84	12.85	25.25	65.95	36.34	35.37	14.49	12.83	26.29	32.06	12.85	25.19	31.14
NM_007185,NM_001172648,NM_001172649	CUGBP Elav-like family member 3 isoform 1	1	0.12	0.07	0.13	0	0.07	0.06	0.04	0	0.07	0	0.03	0.03	0	0.04	0.05	0.28	0.03	0	0.03	0.05	0.05	0.07	0.01	0	0.05	0.03	0	0.59	0.01	0.02	0	0	0.11	0.05	0.04	0	0.09	0	0.25	0.01	0.01	0.01	0.08	0.03	0.06	0.11	0.07
NM_001025089,NM_020180,NM_001025088,NM_001025087	CUGBP Elav-like family member 4 isoform 4	1	0	0	0	0.05	0	0	0.05	0	0.02	0.03	0	0.04	0	0	0	0	0.02	0	0	0.01	0	0	0	0	0	0	0	0	0	0	0	0	0	0	0.02	0.06	0	0	0	0	0	0.01	0.03	0	0	0	0.04
NM_021938,NM_001172673	CUGBP Elav-like family member 5 isoform 1	0	0	0.01	0	0	0	0.01	0.02	0	0.02	0	0	0.02	0	0	0	0	0.01	0.02	0	0.05	0	0.01	0	0	0.05	0	0	0.02	0	0.01	0	0	0	0	0.04	0.03	0.03	0	0.07	0	0	0.02	0	0.06	0	0.03	0.03
NM_001172684,NM_001172685,NM_052840	CUGBP Elav-like family member 6 isoform 2	0	2.58	1.59	0.74	1.3	1.25	0.67	0.25	0.35	0.62	1.07	0.28	2.43	5	0.81	2.45	1.7	1.26	0.55	0.55	1.78	1.31	1.11	0.38	0.71	2.3	0.95	4.09	4.93	0.26	0.57	1.26	3.05	1.22	1.7	1.54	2.09	1.68	3.23	3.08	2.37	1.15	0.89	0.62	1.62	0.61	1.56	1.44
NM_018294	CWF19-like protein 1	0	8.82	8.94	7.11	10.17	7.35	4.21	4.11	9.27	11.9	25.49	3.79	11.96	25.82	4.97	25.37	9.19	11.86	5.7	6.39	5.2	12.22	11.51	2.61	4.75	6.05	7.7	21.16	12.17	2.11	5.64	14.2	12.12	13.41	31.23	18.74	11.53	17.14	38.87	21.59	22.84	14.08	13.07	13.46	16.6	12.98	20.51	9.9
NM_152434	CWF19-like protein 2	0	1.06	1.09	0.76	1.62	2.83	0.4	0.95	1.17	1.37	4.29	0.08	1.88	2.04	0.7	5.44	2.54	3.32	1.37	0.93	0.76	2.11	1.88	0.37	0.54	0.93	1.23	10.38	2.86	0.01	0.67	1.35	5.06	3.01	3.89	1.45	1.64	3.98	3.2	7.91	2.64	1.06	0.75	2.33	1.81	1.76	4.31	2.51
NM_001171174,NM_001337,NM_001171171,NM_001171172	CX3C chemokine receptor 1 isoform a	0	5.59	3.91	11.38	95.78	36.95	6.26	0.1	2.54	0.49	4.74	0.23	6.78	12.59	13.28	22.13	26.72	50.89	17.94	8.56	2.36	6.61	19.3	3.08	12.43	17.23	34.69	62.66	71.93	1.43	2.84	40.3	2.91	29.61	15.05	2.97	0.82	27.9	7.55	25.1	5.08	12.5	5.43	83.98	43.61	28.52	80.59	14.21
NM_025212	CXXC-type zinc finger protein 4	1	0	0	0	0	0	0	0	0	0	0	0	0	0	0	0.44	0	0	0	0	0.04	0	0	0	0	0	0	0	0	0	0	0	0	0	0	0	0	0.15	0	0	0	0	0	0	0	0	0	0
NM_016463	CXXC-type zinc finger protein 5	0	22.31	3.83	1.72	12.08	2.93	3.12	4.48	3.94	14.08	31.74	2.9	4.09	12.31	3.28	16.88	3.73	11.49	6.04	2.36	5.66	6.39	4.62	2.2	5.39	9.93	12.48	17.35	19.78	0.3	11.86	6.56	0.5	0.61	9.95	9.67	14.89	7.17	11.07	4	10.56	3.65	8.18	27.66	16.37	0.92	5.96	8.28
NM_024728,NM_001193311,NM_001193312,NM_001193313	CaiB/baiF CoA-transferase family protein C7orf10	0	0	0.02	0.02	0	0	0	0	0	0.16	0.08	0.11	0.03	0.37	0.02	0.12	0	0.11	0.04	0	0.07	0	0.03	0	0.4	0.21	0	0	0.09	0	0.04	0	0	0	0.09	0.04	0.05	0	0	0.36	0	0.02	0	0	0.42	0.07	0.23	0.16
NM_001352	D site-binding protein	0	1.52	2.09	2.82	21.22	4.91	3.63	0.42	0.37	0.81	2.88	0.79	1.57	4.81	1.67	4.75	3.19	7.89	3.62	2.08	1.94	2.06	2.35	2.73	6.65	5.92	5.97	20.02	11.15	1.44	2.03	5.07	1.31	1.83	0.73	0.82	1.3	4.55	0.35	2.06	1.03	0.96	1.07	9.5	4.72	1.65	10.87	1.91
NM_000794	D(1A) dopamine receptor	1	0	0	0	0	0	0	0	0	0	0	0	0	0	0	0	0	0	0	0	0	0	0	0	0	0	0	0	0	0	0	0	0	0	0	0	0	0	0	0	0	0	0	0	0	0	0	0
NM_000798	D(1B) dopamine receptor	1	0	0	0	0	0	0	0	0	0	0	0	0	0.56	0	0	0	0	0	0	0	0	0	0	0	0	0	0	0	0	0	0	0	0	0	0	0	0	0	0	0	0	0	0	0	0	0	0
NM_000795,NM_016574	D(2) dopamine receptor isoform long	1	0	0	0.02	0	0	0	0	0	0	0	0.07	0	0.46	0	0	0	0	0	0	0	0	0	0	0	0	0	0	0	0	0	0	0	0	0	0	0	0	0	0	0.03	0	0.01	0	0	0	0	0
NM_033663,NM_000796	D(3) dopamine receptor isoform e	0	0	0.04	0	0	0	0	0	0	0	0	0	0	0	0	0	0	0	0	0	0	0	0	0	0	0	0	0	0	0	0	0	0	0	0	0.08	0	0	0	0	0	0	0	0	0	0	0	0
NM_000797	D(4) dopamine receptor	0	0.24	0.3	0.42	0.89	0	0.21	0.18	0.07	0.13	0.19	0.55	0.15	0	0.18	0.41	0.14	0.27	0.03	0.47	0.65	0.06	0.11	0.16	1.14	0.64	0.48	1.56	5.17	0.14	0.19	0.21	0.35	0	0	0.1	0.25	0	0	0.09	0	0	0.16	0	0	0.06	0.14	0.05
NM_152783	D-2-hydroxyglutarate dehydrogenase,	0	8	5.59	3.34	4.74	5.85	2.28	4.72	2.23	7.6	4.58	5.12	4.62	21.2	3.4	7.51	3.92	9.76	3.42	2.06	9.68	4.04	3.86	7.53	8.25	12.48	9.73	15.34	12.52	4.14	7.56	6.52	10.79	2.33	3.33	5.59	3.71	8.35	9.7	3.95	2.1	2	2.44	10.52	8.96	2.83	13.73	5.63
NM_006623	D-3-phosphoglycerate dehydrogenase	0	6.84	15.99	5.61	1.26	2.71	20.03	4.12	11.85	2.6	7.3	3.33	8.4	4.26	4.53	10.58	1.07	8.04	1.72	1.86	6.15	18.09	2.12	10.45	9.99	9.33	11.95	17.67	3.34	1.33	8.2	8.64	8.81	2.37	23.3	3.43	2.51	5.68	4.12	4.87	6.65	1.3	3.48	16.7	1.62	29.11	7.74	2.68
NM_001161814,NM_172370,NM_001161812	D-amino acid oxidase activator isoform 3	1	0	0	0	0	0	0	0	0	0	0	0	0.05	0	0	0	0	0	0	0	0	0	0	0	0	0	0	0	0	0	0	0	0	0	0	0	0	0	0	0	0	0	0	0	0	0	0	0
NM_001917	D-amino-acid oxidase	1	0	0	0	0	0	0	0.08	0	0.12	0	0	0	0	0.03	0	0	0	0	0	0	0	0	0	0	0	0	0	0	0	0	0	0	0	0	0	0	0	0	0	0	0	0	0	0	0	0	0
NM_003649,NM_004032	D-aspartate oxidase isoform a	0	0.19	0.16	0.12	2.39	1.07	0.07	0.07	0.41	0	0.08	0.16	0.15	0	0.41	0.98	0	0.42	0.25	0.18	0.1	0.43	0.67	0	1.23	0.24	0.41	0	0.28	0.18	0.26	0.53	0.42	1.04	1.3	0	0.15	1.16	0.32	1.99	1.63	1.27	0.58	0.18	1.33	0.15	0.96	0.25
NM_203314,NM_203315,NM_004051	D-beta-hydroxybutyrate dehydrogenase,	0	1.06	1.74	1.71	2.09	1.25	1.5	0.23	1.28	0.9	1.54	0.45	1.46	4.81	0.68	2.92	0.72	2.6	1.36	0.89	0.86	2.09	2.5	1.63	2.3	2.59	1.61	5.71	1.98	0.2	1.4	2.41	2.26	1.68	3.93	1.08	0.31	2.86	2.19	3.02	0.91	0.59	0.72	2.89	1.62	2.85	3.6	2.13
NM_001355,NM_001084392	D-dopachrome decarboxylase	0	27.61	19.11	30.14	27.08	30.97	28.09	48.1	21.36	30.66	51.28	46.08	55.42	84.6	22.24	76.74	42.56	30.3	22.96	13.88	25.06	45.12	42.68	17.41	26.67	42.98	26.89	72.78	56.49	21.94	17.27	39.12	76.6	68.32	114.55	52.68	32.17	68.38	44.04	49.36	45.88	22.39	22.15	45.16	46.94	43.31	64.65	23.2
NM_001084393	D-dopachrome decarboxylase-like protein	0	11.71	8.19	12.83	12.25	14.17	11.52	19.67	8.72	12.36	22.02	17.53	22.57	39.89	9.23	31.68	17.44	12.41	9.53	6.15	10.84	18.66	17.16	7.08	11.58	20.2	11.67	32.45	24.49	8.92	7	16	35.6	28.57	46.88	22.1	12.98	27.75	17.37	21.01	19.2	9.57	9.24	19.92	19.7	17.6	25.62	9.77
NM_015554	D-glucuronyl C5-epimerase	0	0.12	0.31	0.14	1.21	0.39	0.13	0.01	0.18	0.05	0.27	0.02	0.41	1.48	0.29	2.63	0.75	0.64	0.37	0.19	0.14	0.46	0.75	0.08	0.14	0.15	0.3	0.36	0.89	0.1	0.05	0.66	0.7	0.25	1.48	0.19	0.17	1.1	0.82	2.9	0.49	0.6	0.14	0.82	1.52	0.32	0.94	0.64
NM_080820	D-tyrosyl-tRNA(Tyr) deacylase 1	0	11.71	3.91	4.46	5.19	5.76	2.5	1.98	5.47	3.44	17.87	4.86	8.44	13.05	4.03	11.69	6.6	9.88	6.14	4.62	2.96	5.21	8.46	3.87	8.9	8.84	5.9	22.53	7.79	0.74	10.69	9.65	9.18	12.72	16.42	9.95	3.13	13.41	13.35	10.41	10.41	5.73	5.52	22.73	13.72	9.91	22.55	8.77
NM_001009996,NM_018114	DALR anticodon-binding domain-containing protein	0	13.71	14.48	12.41	22.59	14.2	14.53	6.59	9.48	13.83	25.09	6.86	20.12	44.06	14.07	31.4	13.13	24.25	11.18	8.7	20.21	23.77	24.1	10.06	28.24	33.43	21.84	55.32	50.43	7.66	9.89	29.35	19.42	26.96	32.65	18.32	20.06	41.6	18.93	26.14	15.39	11.13	11.38	34.69	29.28	21.57	81.39	26.2
NM_152654	DAN domain family member 5 precursor	1	0.36	0.04	0	0	0	0.04	0	0	0	0	0	0.03	0	0	0	0	0	0.03	0	0	0	0.03	0	0	0	0.03	0	0	0	0.11	0	0.28	0	0.09	0	0	0	0.16	0	0	0	0	0	0.13	0	0.11	0.12
NM_170711,NM_018959	DAZ-associated protein 1 isoform a	0	55.75	25.35	27.07	36.82	38.86	21.2	15.01	23.99	16.3	67.37	21.81	23.28	40.91	19.86	66.3	28.19	41.76	17.9	13.39	30.69	34.3	21.97	25.44	52.72	55.49	50.52	155.1	106.61	11.8	41.86	47.42	40.51	25.16	45.31	28.36	19.69	53.07	68.86	55.04	48.4	19.19	21.77	58.93	44.84	30.72	55.32	29.76
NM_001136266,NM_014764,NM_001136268,NM_001136269,NM_001136267,NM_001136264	DAZ-associated protein 2 isoform c	0	219.25	46.99	69.46	176.84	90.12	35.47	35.89	38.68	117.35	305.43	35.82	97.78	159.84	28.46	198.08	120.07	106.81	57.65	69.44	64.8	61.59	114.31	16.16	42.57	64.15	62.88	221.26	222.09	9.73	93.42	86.29	203.4	139.26	223.91	181.63	184.24	169.75	702.85	322.3	391.4	183.92	137.81	146.57	243.99	85.24	207.46	316.95
NM_020923	DBF4-type zinc finger-containing protein 2	0	0.51	0.02	0.01	0.08	0.01	0	0.04	0.02	0.43	1.1	0.06	0.06	0.09	0.02	0.02	0	0.09	0.02	0.01	0.03	0.01	0.03	0	0	0.05	0.01	0	0.02	0	0.03	0.06	0	0.07	0.41	0.49	0.69	0.1	0.67	0.04	0.09	0.05	0.05	0.23	0.16	0.04	0.03	0.14
NM_015529	DBH-like monooxygenase protein 1 isoform 2	0	0.1	0.39	0.06	0	0.2	0.32	0	0.17	0	0.33	0.03	0.32	0	0.09	0.55	0.19	0.15	0.01	0.03	0.16	0.61	0.21	0.01	0	0.17	0.15	0	1.13	0.05	0	0.09	0	0	4.49	0.05	0.2	0.73	0.29	0	0.06	0.07	0.07	0.35	0.32	0.11	0.2	0.14
NM_001143687,NM_152494	DC-STAMP domain-containing protein 1 isoform 2	0	0	0.03	0.07	0.14	0.27	0.04	0	0.03	0.31	0.16	0.08	0.13	0.56	0.09	0.25	0	0.22	0.1	0.09	0.1	0.02	0.09	0.03	0.07	0.05	0.11	0	0	0.02	0.22	0.24	0	0	0.19	0.17	0.49	0.21	0.13	0	0.04	0.08	0.32	0.07	0.23	0.03	0.09	0.03
NM_144622	DC-STAMP domain-containing protein 2	0	0.12	0.11	0.09	0.05	0	0.09	0.08	0.1	0.11	0.21	0.08	0.04	0.56	0.06	0.23	0.14	0.15	0.19	0.05	0.29	0.03	0.36	0.08	0.29	0.53	0.2	0	0.26	0.06	0.03	0.29	0.88	0.5	0.31	0.09	0.99	0.28	0.13	0.05	0.3	0.18	0.43	0.25	0.71	0.17	0.85	0.33
NM_012096	DCC-interacting protein 13-alpha	0	2.22	1.15	0.34	2.15	1.14	0.29	0.16	0.91	1.44	4.72	0.09	1.38	1.3	0.48	2.85	0.72	1.97	0.89	0.34	0.74	1.05	0.97	0.06	0.26	0.52	0.58	1.45	0.98	0.01	1.21	1.42	1.08	1.61	8.01	3.1	2.6	3.31	8.59	4.8	5.01	2.24	1.56	4.21	2.72	2.16	2.27	2.49
NM_018171	DCC-interacting protein 13-beta	0	6.41	2.37	1.13	2.98	2.19	1.19	0.36	1.84	5.76	14.02	0.38	3.46	7.31	0.86	5.43	3.19	4.03	2.04	1.64	2.11	1.88	3.33	0.66	1.99	2.66	1.4	5.18	4.41	0.11	3.34	1.87	3.22	4.09	6.48	7.55	4.5	5.31	13.57	7.17	9.27	3.37	3.24	6.34	6.02	2.64	3.8	6.8
NM_020640	DCN1-like protein 1	0	5.66	0.27	0.13	0.42	2.17	0.24	0.47	0.21	1.46	5.96	1.83	0.76	12.12	0.21	1.83	3.73	0.54	0.58	0.71	0.22	0.55	0.78	0.03	0.88	0.28	0.65	3.27	1.29	0.05	0.22	0.42	1.43	4.66	2.78	1.79	1.22	3.17	4.82	3.75	2.27	0.82	0.7	4.55	6.73	1.07	2.27	2.02
NM_001014283	DCN1-like protein 2	0	2.48	1.57	0.54	0.84	2.13	0.44	0.56	0.52	3.57	4.72	0.92	1.57	6.29	0.61	3.38	1.14	2.05	1.24	0.9	1.23	1.28	2.01	0.54	0.86	1	1.16	3.51	1.24	0.18	0.96	2.45	0.94	2.19	3.04	2.88	3.84	2.24	6.28	2.7	2.3	1.71	1.39	3.78	3.88	1.19	3.8	3.24
NM_173475	DCN1-like protein 3	0	1.54	0.83	0.74	1.24	0.84	0.08	0.08	0.58	0.5	0.91	0	0.42	0	0.1	0.75	0.26	0.37	0.11	0.2	0.47	0.18	0.27	0.1	0.31	0.24	0.27	4.9	1.31	0.14	0.65	0.29	4.05	0.65	0.58	0.87	4.34	0.33	20.74	2.15	1.97	0.66	0.46	0.48	0.71	0.23	0.43	3.28
NM_001040402,NM_015115	DCN1-like protein 4 isoform 1	0	0.75	0.73	0.32	0.65	0.9	0.24	0.17	0.52	1.54	2.59	0.13	1.87	3.24	0.54	2.21	0.21	1.42	0.78	0.42	0.52	1.13	1.23	0.12	0.69	0.48	0.72	2.72	0.41	0.1	0.5	0.86	0.77	1.11	2.62	1.34	3.61	3.28	3.55	2.43	1.55	1.06	0.47	3.3	2.23	1.1	1.84	1.84
NM_032299	DCN1-like protein 5	0	0.67	0.58	0.25	0.36	0.74	0.16	0.22	1.33	1.15	2.48	0.15	1.44	0.93	0.45	2.42	0.51	1.21	0.59	0.28	0.43	1.32	0.8	0.26	0.41	0.55	0.68	2.61	0.76	0.02	0.78	0.68	1.1	0.5	4.68	1.08	1.17	1.3	2.06	2.12	1.45	0.61	0.6	1.68	1.07	1.21	1.02	0.67
NM_024345	DDB1- and CUL4-associated factor 10	0	3.37	1.08	1.06	2.01	2.12	0.87	0.54	0.7	1.61	4.13	0.69	1.8	6.39	0.78	4.54	5.2	2.01	0.99	1.21	1.18	1.47	2.07	0.29	0.99	1.06	0.74	3.38	3.97	0.15	0.74	1.29	3.48	3.94	4.56	1.03	1.43	4.23	5.49	6.33	2.86	1.52	0.74	3.2	5.37	1.73	4.4	4.22
NM_001163484,NM_025230,NM_181357	DDB1- and CUL4-associated factor 11 isoform 1	0	64.23	15.8	23.24	37.79	22.99	12.99	8.2	7.08	12.28	64.19	34.51	14.06	48.87	8.31	40.13	37.31	27.22	13.43	18.73	13.64	16.69	18.17	9.01	30.04	29.2	28.16	71.69	74.55	5.35	14.73	23.53	27.38	38.6	31.74	19.52	11.09	45.25	80.44	50.26	35.69	23.49	22.44	53.72	51.5	24.57	66.84	38.98
NM_015397	DDB1- and CUL4-associated factor 12	0	293.74	8	10.95	42.3	101.91	10.07	14.1	5.91	65.46	157.81	84	10.98	462.32	4.19	106.63	173.35	14.94	13.97	24.35	8.67	10.16	16.81	2.09	32.67	8.33	21.38	44.84	34.09	3.44	3.06	8.33	52.96	324.21	32.84	11.88	27.23	127.54	39.66	95.78	29.16	17.51	14.71	179.92	248.3	15.78	143.6	45.33
NM_001013628	DDB1- and CUL4-associated factor 12-like protein	1	0	0	0	0	0	0	0	0	0	0	0	0	0	0	0	0	0.01	0	0	0	0	0	0	0	0	0	0	0	0	0	0	0	0	0	0	0	0	0	0	0	0	0	0	0	0	0	0
NM_178470	DDB1- and CUL4-associated factor 12-like protein	1	0	0	0	0	0	0	0	0	0	0	0	0.03	0	0	0	0.05	0	0	0	0	0	0	0	0	0	0	0	0	0	0	0	0	0	0	0	0	0	0	0	0	0	0	0	0	0	0	0
NM_015420	DDB1- and CUL4-associated factor 13	0	3.93	1.98	0.88	1.42	3.43	0.66	0.87	4.18	4.33	16.98	0.82	4.82	3.98	1.83	11.92	2.19	6.17	1.99	1.38	1.28	5.33	3.77	0.75	0.85	2.3	1.45	6.72	0.89	0.18	1.53	3.2	4.65	4.41	11.98	5.22	2.82	6.72	7.32	9.1	4.98	2.61	1.76	7.71	3.4	5.08	3.04	2.56
NM_138353	DDB1- and CUL4-associated factor 15	0	28.62	7.59	6.19	29.42	11.42	4.61	4.31	7.03	20.17	28.19	5.46	10.44	37.67	7.15	22.25	12.87	14.85	10.6	8.17	10.92	8.01	11.76	6.37	17.92	19.64	14.72	33.93	38.06	2.68	17.01	11.74	8.27	7.03	6.58	10.64	11.71	13.43	26.03	13.77	16.52	10.12	14.47	21.54	22.35	5.42	16.11	14.7
NM_017741	DDB1- and CUL4-associated factor 16	0	3.93	0.71	0.18	1.07	0.35	0.2	1.14	0.37	2.26	7.51	0.8	1.58	2.59	0.34	2.19	0.47	2.03	0.95	0.38	0.78	0.68	0.53	0.12	0.57	0.67	0.5	2.72	0.72	0.15	1.7	1.02	1.36	1.25	5.16	3.67	2.63	3.17	6.85	2.05	2.52	1.99	2.03	3.09	3.14	1.15	2.98	1.91
NM_025000,NM_001164821	DDB1- and CUL4-associated factor 17 isoform 1	0	1.35	0.5	0.19	0.64	0.73	0.22	0.04	0.38	0.49	2.04	0.21	0.64	0.56	0.3	1.44	0.65	1.46	0.61	0.22	0.43	0.55	0.52	0.12	0.41	0.37	0.32	1.84	0.89	0.03	0.39	1.06	0.48	0.82	3.57	0.86	0.67	2.28	2.09	1.47	1.43	0.75	0.44	2.24	1.36	1.07	2.13	1.27
NM_181341,NM_001163508,NM_015604,NM_001163509,NM_181340	DDB1- and CUL4-associated factor 4 isoform 3	0	3.44	1.62	0.96	1.99	1.19	1.24	0.95	0.85	1.7	9.51	0.33	1.89	4.17	0.91	2.37	0.49	3.95	0.64	0.63	1.04	2.5	1.6	0.43	1.43	1.6	2.35	7.23	2.51	0.15	2.55	1.55	2.04	1.29	2.97	3.03	3.89	3.16	2.92	2.46	2.83	1.82	1.69	3.06	2.04	2.19	3.46	1.73
NM_001029955	DDB1- and CUL4-associated factor 4-like protein	0	0.07	0.03	0.17	0.07	0.21	0.02	0.02	0.05	0.39	0.11	0	0.04	0	0.08	0.44	0.19	0.17	0.14	0.08	0.26	0.14	0.36	0.01	0	0.07	0.03	1.09	0.2	0	0.03	0	0.06	0.11	0.15	0.06	1	0.15	0.13	0.8	0.21	0.18	0.03	0.2	0	0.17	0.09	0.25
NM_152418	DDB1- and CUL4-associated factor 4-like protein	1	0	0	0	0	0	0	0	0	0	0	0	0	0	0	0	0	0	0	0	0	0	0	0	0	0	0	0	0	0	0	0	0	0	0	0	0	0	0	0	0	0	0	0	0	0	0	0
NM_003861	DDB1- and CUL4-associated factor 5	0	11.56	5.24	4.6	13.4	5.52	2.77	1.1	1.82	6.31	15.81	2.26	3.93	10	2.34	7.49	5.32	7.8	3.66	3.4	4.92	3.41	4.08	1.61	4.75	5.87	7.7	16.94	15.31	1	5.64	6.05	5.37	6.2	8.21	6.67	9.22	12.31	28.25	12.65	8.75	5.38	7.1	16.68	11	6.11	15.06	9.86
NM_001017977,NM_018442	DDB1- and CUL4-associated factor 6 isoform b	0	21.42	2.64	1.79	5.62	5.64	1.86	1.63	1.68	5.41	9.79	5.39	4.61	28.23	1.59	8.41	14.48	3.6	3.31	3.41	3.27	2.83	5.1	0.41	3.16	2	3.34	5.09	4.43	0.38	1.29	2.49	7.54	14.91	10.07	3	5.28	10.52	13.73	13.41	7.84	3.22	3.37	12.82	15.85	3.21	13.79	7.21
NM_005828	DDB1- and CUL4-associated factor 7	0	5.56	5.33	5.11	18.53	5.78	3.62	0.46	2.4	4.7	8.59	1.5	4.01	6.29	2.25	9.27	4.97	8.49	3.55	2.92	1.72	3.39	4.31	2.11	3.01	4.13	8.03	20.22	10.49	0.76	2.96	5.42	4.65	10.83	12.37	2.96	4.46	12.68	11.38	16.43	4.67	3.02	2.19	21.22	7.51	9.37	17.67	9.75
NM_015726	DDB1- and CUL4-associated factor 8	0	21.39	8.96	7.23	15.76	13.44	5.83	4.03	5.36	20.41	31.99	6.96	13.54	39.89	5.48	26.58	12.5	14.72	9.74	6.26	9.06	11.14	15.29	3.34	10.77	14.3	11.18	30.74	19.17	2.93	7.96	13.82	23.89	21.26	28.83	13.11	20.77	26.81	31.9	23.22	15.1	8.86	8.66	28.45	22.42	11.57	40.71	19.37
NM_001136533	DDB1- and CUL4-associated factor 8-like protein	1	0.14	0	0	0	0	0	0	0	0	0	0	0	0	0	0.05	0	0	0.02	0.03	0	0	0	0	0	0	0	0	0	0	0	0	0	0	0	0	0	0	0	0	0	0	0	0	0	0	0	0
NM_001017930	DDB1- and CUL4-associated factor 8-like protein	1	0	0	0	0	0	0	0	0	0	0	0	0	0	0	0	0	0	0.03	0	0	0	0	0	0	0	0	0	0	0	0	0	0	0	0	0	0	0	0	0	0	0	0	0	0	0	0	0
NM_023935	DDRGK domain-containing protein 1 precursor	0	19.83	17.61	23.4	32.17	20.34	23.57	7.55	9.09	10.36	23.04	8.59	14.06	20.64	17.34	32.63	18.94	15.49	10.77	11.31	21.64	21.93	16.87	18.41	39.62	38.28	21.73	86.9	102.27	12.9	21.43	30.44	24.82	24.23	23.44	14.97	11.58	22.51	18.99	29.32	16.25	10.73	10.38	27.79	22.81	15.63	40.31	16.62
NM_182699	DEAD box protein 53	1	0	0	0	0	0	0	0	0	0	0	0	0	0	0	0	0	0	0	0	0	0	0	0	0	0	0	0	0	0	0	0	0	0	0	0	0	0	0	0	0	0	0	0	0	0	0	0
NM_020946,NM_024820	DENN domain-containing protein 1A isoform 1	0	19.15	5.97	12.24	24.07	11.4	7.04	4.92	1.27	2.55	9.21	4.68	4.3	12.59	3.76	17.31	13.67	8.69	4.52	8.66	8.31	4.13	6.29	3.04	15.52	13.91	12.76	40.41	43.1	4.54	8.27	7.74	15.43	12.12	7.21	6.81	5.04	16.56	42.39	23.53	21.74	8.56	12.36	14.91	21.64	5.08	21.7	16.84
NM_001195215,NM_144977,NM_001195216	DENN domain-containing protein 1B isoform 3	0	1.42	0.66	0.19	0.47	0.6	0.16	0.16	0.91	1.59	4.36	0.29	1.55	1.2	0.24	1.97	0.61	1.35	0.72	0.3	0.51	1.12	0.87	0.04	0.12	0.31	0.21	1.35	0.37	0.09	0.5	0.49	1.43	0.61	8.11	1.92	1.69	3.74	15.09	5.27	6.05	1.63	0.96	2.28	2.62	0.99	1.16	1.35
NM_024898	DENN domain-containing protein 1C	0	23.32	18.93	37.56	51.26	29.42	25.36	18.27	6.83	14.67	30.39	21.6	16.85	52.85	18.85	35.01	32.6	37.39	21.67	18.46	34.72	19.25	22.27	31.99	59.31	66.06	50.99	88.89	105.17	17.14	26.99	34.82	38.94	59.54	27.89	34.46	17.72	59.17	46	55.31	35.75	20.19	26.09	68.79	55.29	40.17	109.98	40.34
NM_015689	DENN domain-containing protein 2A	1	0	0.04	0	0	0	0.12	0	0	0.02	0	0	0.04	0	0	0.04	0.05	0	0.01	0	0.05	0.01	0.04	0	0.05	0.08	0.02	0	0.22	0	0	0	0	0	0	0.02	0.02	0	0	0	0	0	0.01	0.13	0	0	0.28	0.04
NM_198459	DENN domain-containing protein 2C	1	0.24	0.03	0.01	0	0.1	0	0.01	0	0.02	0.16	0.02	0.02	0	0.02	0.09	0	0.04	0.01	0	0.08	0.03	0.1	0	0	0	0.02	0	0	0	0.1	0	0	0	0.08	0.05	0.04	0	0	0	0.07	0.02	0.02	0.03	0.13	0.01	0	0.04
NM_024901	DENN domain-containing protein 2D	0	6.46	27.04	41.02	36.02	44	20.55	3.65	16.57	7.11	20.91	6.16	33.25	32.95	17.45	35.12	17.49	65.4	24.93	14.24	17.8	32.32	30.05	17.99	21.5	32.58	45	140.78	52.39	3.23	10.89	33.14	55.47	17.89	31.99	9.15	6.28	50.65	20.39	49.32	13.09	7.39	4.05	117.4	25.17	86.08	78.81	25.65
NM_014957	DENN domain-containing protein 3	0	32.88	26.69	27.01	43.6	28.25	11.82	4.46	7.74	12.52	14.07	4.16	31.01	29.34	9.24	54.9	41.41	20.05	13.49	26.27	32.11	11.76	39.1	7.03	16.33	31.87	22.48	79.22	67.28	2.72	24.08	17.95	78.5	46.85	27.67	30.24	29.05	37.16	204.82	68.81	83.91	27.72	43.75	22.51	48.07	9.62	35.83	81.94
NM_014856	DENN domain-containing protein 4B	0	20.55	12.05	11.03	33.83	16.72	9.08	3.63	4.63	6.82	18.21	5.39	13.83	26.66	8.07	28.71	20.94	17.51	11.58	8.33	24.48	11.72	17.28	5.08	16.63	23.7	22.49	57.61	53.46	4.45	11.7	11.46	21.42	19.36	16.63	8.63	7.42	19.35	42.39	29.18	24.88	13.77	9.82	29.76	28.86	11.87	33.96	32.03
NM_017925	DENN domain-containing protein 4C	0	1.69	0.42	0.11	1.1	0.88	0.06	0.58	0.54	1.91	4.99	0.51	1.22	0.46	0.36	1.96	0.23	1.61	0.74	0.26	0.44	0.46	0.43	0.06	0.07	0.27	0.23	1.6	0.37	0.09	0.72	0.41	0.9	1.22	3.49	2.99	3.57	3.53	4.09	3.66	3.43	1.63	0.78	3.58	2.62	1.45	2.44	1.53
NM_015213	DENN domain-containing protein 5A	0	68.92	15.24	12.88	47.75	18.41	6.82	7.89	9.53	24.67	46.3	11.42	19.99	14.25	4.39	28.52	18.7	13.4	9.65	14.33	18.58	7.88	20.8	1.72	8.78	14.1	15.77	41.61	50.95	1.81	12	11.32	39.48	23.91	15.47	20.41	82.69	20.94	194.74	49.01	47.73	15.79	17.59	19.13	29.12	7.53	24.96	79.59
NM_144973	DENN domain-containing protein 5B	0	1.32	0.37	0.02	0.12	0.04	0.28	0.09	0.34	0.41	1.94	0	0.57	0.56	0.17	0.98	0.23	0.33	0.17	0.05	0.45	0.98	0.27	0.03	0.02	0.37	0.23	0.39	0.35	0.01	0.12	0.3	0.22	0.14	6.69	0.73	1.36	0.83	1.71	0.24	0.57	0.18	0.2	0.72	0.78	0.16	0.65	0.63
NM_022783	DEP domain-containing mTOR-interacting protein	1	0.12	0.12	0.05	0.34	0	0.07	0.12	0.12	0.03	0.19	0.22	0.12	0.28	0.01	0.37	0	0.13	0.14	0.04	0.09	0.18	0.04	0.02	0.14	0.07	0	0.17	0.17	0.03	0.12	0.26	0	0.57	0.68	0.06	0.2	0.27	0	0.14	0.03	0.14	0.01	0.35	0.29	0.08	0.09	0.14
NM_001114120,NM_017779	DEP domain-containing protein 1A isoform a	0	0	0.22	0.02	0	0.15	0.07	0.02	0.42	0	0.24	0.04	0.34	0.09	0.07	0.27	0	0.27	0.03	0.02	0.05	0.3	0.22	0.01	0	0.02	0.07	0.19	0	0.02	0.07	0.17	0.18	0.07	2.12	0.05	0	0.24	0.16	0.47	0.42	0.01	0.05	0.43	0.03	0.57	0	0.03
NM_018369,NM_001145208	DEP domain-containing protein 1B isoform 1	0	0.87	0.6	0.13	0.09	0.97	0.22	0.13	1.77	0.03	1.54	0	1.29	0	0.25	0.85	0.28	1.3	0.36	0.13	0.22	0.95	0.78	0.31	0	0.18	0.5	0.9	0	0	0.46	0.5	2.83	0.61	5.87	0.32	0.24	0.98	1.11	2.57	1	0.16	0.17	3.66	0.39	3.46	0.34	0.26
NM_152317	DEP domain-containing protein 4	1	0	0	0	0	0	0	0	0	0	0	0	0.09	0	0.02	0	0	0.05	0.1	0.05	0.05	0	0.04	0.04	0	0	0	0	0	0.07	0	0	0	0.5	0.64	0	0.07	0.1	0	0.54	0	0.09	0	0	0	0.23	0	0
NM_014662,NM_001007188,NM_001136029	DEP domain-containing protein 5 isoform 1	0	2.46	1.32	1.02	2.94	1.12	1.1	0.24	0.46	0.82	2.89	0.54	0.82	2.41	0.71	2.12	0.84	1.63	0.99	0.8	1.54	1	1.33	0.51	1.16	1.72	1.61	4.73	2.99	0.2	0.71	1.69	1.14	2.22	1.46	1.15	0.57	2.21	2.47	3.15	1.13	1.12	0.95	4.12	3.3	1.5	4.06	2.52
NM_001077242,NM_139160	DEP domain-containing protein 7 isoform 1	0	0	0.03	0.04	0.39	0.1	0.03	0.04	0	0	0.13	0.18	0.02	0	0	0.28	0	0.09	0.08	0.03	0.02	0.02	0	0	0	0	0	0	0	0	0	0	0	0	0.15	0	0.43	0.4	0.13	0.38	0.13	0	0	0.08	0	0.09	0	0.15
NM_017996,NM_001144074	DET1 homolog isoform 1	0	0.14	0.61	0.73	1.74	0.08	0.36	0.04	0	0.04	0.52	0	0.3	0.83	0.27	0.34	0.16	1.06	0.39	0.34	0.28	0.39	0.43	0.14	0	0.35	0.26	1.75	0.87	0.03	0.16	0.38	0.7	0.14	0.83	0.09	0.07	0.55	0.82	1.07	0.22	0.43	0.18	2.09	0.84	0.65	1.84	0.64
NM_024050	DET1- and DDB1-associated protein 1	0	15.61	4.66	4.95	8.61	8.41	3.06	3.33	4.5	9.82	19.43	5.66	6	12.59	4.45	12.36	8.19	7.6	4.25	4.05	5.08	7.3	6.1	4.51	12.6	14.29	8.28	23.17	25.37	2.21	6.36	8.4	10.9	5.52	5.13	8.32	11.44	7.56	19.63	10.52	9.08	3.85	5.8	7.54	11.94	3.71	10.89	7.77
NM_133375,NM_001143688	DIS3-like exonuclease 1 isoform 2	0	2.58	2.11	0.97	2.41	3.06	0.91	0.22	1.72	2.19	5.79	0.3	1.61	2.78	0.68	4.89	1.35	3.94	1.76	0.85	1.82	1.52	1.54	0.5	0.97	1.52	1.4	3.68	1.53	0.29	2.39	3.09	1.69	2.47	6.86	2.93	1.38	4.68	4.09	4.27	2.49	1.87	1.36	7.38	4.17	3.34	4.57	2.72
NM_152383	DIS3-like exonuclease 2	0	3.85	1.25	1.22	5.05	1.44	1	0.97	0.88	1.14	4.66	0.98	1.35	4.35	0.89	3.15	1.07	2.58	1.54	0.75	1.27	1.31	1.38	1.31	3.22	3.69	2.82	2.59	4.73	1.02	2.06	2.49	1.34	2.4	2.29	2.15	1.2	3.67	3.87	3.13	2.61	1.59	1.61	5.06	3.72	2	4.99	3.69
NM_001379,NM_001130823	DNA (cytosine-5)-methyltransferase 1 isoform b	0	8.94	4.8	5.97	14.15	4.4	2.35	0.82	3.04	2.02	9.75	0.78	1.48	3.89	1.9	5.5	1.33	9.01	3.39	2.16	3.66	2.88	2.37	3.17	5.91	5.13	11.43	24.02	13.83	0.4	7.1	4.33	1.71	2.15	4.07	3.64	2.82	10.39	5.45	8.54	4.17	2.64	3.28	23.17	6.7	9.98	10.92	6.31
NM_013369,NM_175867	DNA (cytosine-5)-methyltransferase 3-like	1	0	0.04	0	0	0	0.08	0.05	0	0	0	0	0.03	0	0.01	0.12	0	0.02	0.04	0	0.05	0	0.06	0	0.21	0	0.03	0.34	0	0	0	0.04	0	0	0	0	0.05	0.13	0	0.07	0	0	0	0	0.16	0	0	0
NM_175629,NM_153759,NM_022552,NM_175630	DNA (cytosine-5)-methyltransferase 3A isoform a	0	4.22	3.18	2.96	6.57	4.05	1.82	0.81	1.46	1.77	4.91	0.77	3.18	7.03	1.55	5.25	2.91	5.08	2.13	2.39	2.99	2.4	2.39	1.24	3.53	4.75	3.77	8.75	6.67	0.48	4.01	4.07	6.47	5.59	6.23	3.47	1.93	8.15	7.99	6.01	5.86	2.83	2.05	7.77	5.24	4.36	8.34	7.47
NM_006892,NM_175848,NM_175849,NM_175850	DNA (cytosine-5)-methyltransferase 3B isoform 1	1	0.07	0.13	0.01	0.05	0.14	0.07	0	0.15	0.11	0.14	0	0.16	0	0.13	0.16	0.09	0.06	0.06	0.07	0.15	0.16	0.11	0.02	0.03	0.21	0.11	0	0.07	0	0.03	0.03	0.06	0	0.38	0.05	0.13	0.07	0	0.09	0.21	0.02	0.05	0.53	0.06	0.11	0.14	0.03
NM_014881	DNA cross-link repair 1A protein	0	0.29	0.52	0.16	0.4	1.04	0.11	0.04	0.83	0.22	0.97	0.17	0.82	0.28	0.29	1.85	0.61	1.64	0.42	0.11	0.3	0.74	0.58	0.12	0.03	0.22	0.58	2.48	0.35	0	0.33	0.22	0.79	0.32	2.69	0.24	0.25	1.21	1.36	1.57	0.31	0.38	0.11	2.84	0.84	1.67	0.51	0.5
NM_145298,NM_001006666	DNA dC->dU-editing enzyme APOBEC-3F isoform a	0	0.67	2.12	2.03	3.46	1.5	1.92	0.33	0.43	0.51	1.27	0.22	1.38	0.83	0.85	3.11	0.72	2.7	0.82	0.82	1.09	1.96	1.36	1.25	1.37	1.99	3.38	9.05	10.03	0.84	0.21	2.31	3.18	2.62	4.08	1.45	0.91	5.05	2	4.33	1.21	0.75	0.67	2.71	2.65	3.46	5.33	0.93
NM_021822	DNA dC->dU-editing enzyme APOBEC-3G	0	9.93	27.94	20.41	28.96	20.23	19.37	1.14	18.18	15.07	37.35	2.44	29.94	21.2	13.45	54.9	16.44	62.65	15.33	12.3	13.03	33.03	19.52	11.61	18.74	23.68	41.18	116.38	74.31	3.55	11.78	35.75	33.02	24.02	80.99	29.74	20.95	65.45	58.69	67.98	27.06	16.74	11.64	52.1	35.94	47.41	57.22	16.99
NM_001166003,NM_181773,NM_001166002,NM_001166004	DNA dC->dU-editing enzyme APOBEC-3H isoform 1	0	2.75	4.34	3.45	6.11	1.42	2.26	0.53	2.77	1.32	3.28	1.39	2.57	4.63	1.35	1.65	1.59	6.85	1.31	0.38	0.52	4.79	1.59	4.54	3.49	4.16	4.37	5.97	5.89	0.71	3.43	2.13	4.14	1.04	3.12	2.3	0.53	4.9	2.89	4.29	2.5	2.23	1.51	7.63	2.39	13.45	3.06	0.75
NM_001923	DNA damage-binding protein 1	0	50.88	16.55	16.09	29.35	14.92	10.74	3.24	13.51	17.11	41.33	5.52	18.64	48.78	9.84	34.05	19.01	22.98	10.86	7.88	7.32	18.65	14.09	8.22	13.4	16.15	24.57	47.68	23.8	2.29	15.65	23.6	17.56	26.02	58.19	17.06	13.17	33.89	30.79	34.82	20.93	13.46	11.12	75.78	32.29	32.22	58.07	21.79
NM_000107	DNA damage-binding protein 2	0	8.65	6.75	5.71	15.51	8.83	3.03	6.41	8.01	7.95	12.39	5.7	10.94	32.76	5.6	19.19	8	15	8.26	4.66	6.82	12.72	12.02	6.49	13.14	11.22	11.41	25.16	48.48	2.96	9.5	19.17	7.17	8.89	27.32	12.44	10.13	21.51	15.22	15.86	9.72	9.07	6.8	32.33	18.51	15.6	30.21	7.48
NM_001195055,NM_001195054,NM_001195057,NM_001195056,NM_001195053,NM_004083	DNA damage-inducible transcript 3 protein	0	55.7	14.87	7.84	14.95	16.44	4.88	29.73	19.56	76.81	107.97	31.96	49.86	69.51	9.47	74.55	23.93	19.44	10.99	11.81	52.32	13.2	20.68	7.28	30.39	77.21	11.13	78.23	89.64	2.61	11.97	14.15	27.95	31.54	41.79	100.16	366.65	28.65	109.51	65.12	58.43	29.42	24.92	13.51	43.93	10.68	26.69	25.94
NM_019058	DNA damage-inducible transcript 4 protein	0	135.75	32.78	15.88	12.5	24.15	12.67	26.54	26.88	90.06	141.45	39.77	55.4	32.76	8.68	25.4	22.25	11.91	14.11	8.72	19.57	14.73	15.68	11.54	44.96	51.25	45.44	128.72	315.29	1.24	56.83	10.68	14.45	12.65	50.25	112.36	173.91	38.8	357.96	22.82	54.12	26.99	43.79	218.9	82.46	12.36	65.5	64.91
NM_145244	DNA damage-inducible transcript 4-like protein	0	0.12	0	0	0	0	0.02	0	0	0.2	0.43	0	0.02	0	0	0.18	0	0.04	0.01	0	0	0.02	0.02	0	0	0	0	0	0	0	0.1	0	0	0.11	0	0	0	0	0	0	0	0.01	0	0.12	0.1	0.02	0	0.03
NM_178454	DNA damage-regulated autophagy modulator protein	0	13.47	8.72	5.48	7.4	10.68	4.58	4.44	12.44	16.58	26.81	5.09	19.87	33.88	9.41	40.54	14.27	16.07	8.45	5.44	13.49	17.42	24.1	1.35	5.81	5.31	3.77	18.21	15.44	2.2	6.72	12.5	30.36	17.78	50.01	18.9	26.9	32.16	53.27	41.43	35.41	18	8.24	20.35	34.29	13.78	20.48	15.27
NM_018370	DNA damage-regulated autophagy modulator protein	0	33.63	5.04	3.88	6.97	6.49	2.63	10.32	4.63	23.9	32.55	22.41	7.16	5.37	3.43	19.69	10.24	4.7	3.12	4.5	3.82	7.31	11.02	0.98	1.87	2.49	5.37	22.01	6.33	0.97	2.2	5.35	42.81	8.03	10.14	10.8	38.91	9.35	69.31	24.54	20.72	5.94	5.64	7.12	9.87	5.93	5.39	19.22
NM_001983,NM_001166049,NM_202001	DNA excision repair protein ERCC-1 isoform 2	0	11.3	4.28	5.25	12.39	6.01	5.31	4.21	3.49	3.38	8.35	5.79	5.43	18.51	4.84	15.8	7.46	8.79	6.15	4.47	6.38	6.96	6.88	3.62	9.59	11.69	9.3	15.3	12.63	4.32	8.1	13.49	5.81	14.59	12.33	8.29	4.68	13.68	7.51	9.77	9.65	7.99	5.73	17.72	15.79	7.48	22.52	8.37
NM_000124	DNA excision repair protein ERCC-6	0	0.77	0.28	0.14	0.65	0.38	0.16	0.1	0.07	0.19	1.49	0.04	0.19	0.56	0.13	0.71	0.21	0.51	0.21	0.09	0.17	0.32	0.43	0.06	0.12	0.34	0.23	1.54	0.44	0.01	0.19	0.09	0.4	0.65	0.58	0.45	0.22	0.39	0.92	0.83	0.51	0.3	0.25	1.45	0.49	0.35	1.36	0.61
NM_017669	DNA excision repair protein ERCC-6-like	0	0.67	0.4	0.16	0	0.1	0.05	0.05	0.8	0.23	1.21	0	0.26	0.19	0.06	0.39	0	0.57	0.03	0.03	0.02	0.59	0.37	0.12	0	0.11	0.37	0.24	0.11	0.04	0.14	0.05	0.39	0.29	1.94	0.17	0.06	0.42	0.32	1.14	0.24	0.09	0.15	0.9	0.06	1.15	0.09	0.16
NM_000082	DNA excision repair protein ERCC-8 isoform 1	0	0.77	0.35	0.1	0.32	0.79	0.02	0.27	0.82	0.43	1.34	0.45	1.34	0.65	0.42	1.58	0.26	1.23	0.9	0.16	0.43	1.38	0.96	0.05	0.43	0.47	0.27	0.62	0	0.15	0.56	1.02	0.57	0.29	5.6	1.25	1	1.31	1.08	2.1	1.31	0.99	0.29	2.17	1.59	0.84	1.3	0.87
NM_004401,NM_213566	DNA fragmentation factor subunit alpha isoform	0	2.12	1.91	2.29	3.13	3.45	1.72	0.64	1.4	1.05	4.32	0.85	1.86	2.68	1.47	5.59	1.7	3.01	1.26	0.68	1.84	2.83	1.63	1	3.27	2.4	3.69	6.35	4.67	0.8	1.48	2.54	2.3	2.47	5.12	1.47	0.93	4.13	3.17	4.98	2.92	2.11	1.41	6.18	2.14	4.39	7.15	2.44
NM_004402	DNA fragmentation factor subunit beta	0	1.13	0.96	0.47	1.68	1.07	0.42	0.05	0.75	0.41	0.94	0.03	0.71	1.48	0.48	1.65	0.65	1.63	0.81	0.42	1.29	1.05	0.83	0.36	1.56	1.43	1.17	5.2	2.12	0.1	0.91	1.06	0.94	1	1.48	0.35	0.59	1.85	1.65	1.86	1	0.66	0.51	2.68	2.3	1.75	3.4	1.25
NM_033647	DNA helicase B	0	1.2	0.68	0.52	1.64	0.66	0.28	0.08	0.18	0.55	3.88	0.11	0.78	0.56	0.1	1.49	0.58	0.56	0.19	0.43	0.62	0.39	0.27	0.21	0.67	0.24	0.67	4.92	1.11	0	0.63	0.27	5.13	0.25	1.41	0.8	0.73	1.39	19.18	3.69	3.09	0.73	0.37	1.27	1.49	1.14	0.54	1.63
NM_000234	DNA ligase 1	0	8.14	5.42	5.43	5.53	4.77	3.03	1.37	3.74	2.93	11.54	2.48	4.24	9.44	1.78	4.3	2.1	9.97	3.54	2.81	4.13	4.64	4.32	5.83	8.16	7.62	9.61	8.36	11.21	0.63	9.76	7.24	4.76	2.72	7.17	5.82	5.18	11.15	6.78	7.51	3.44	2.66	3.8	20.87	6.15	11.42	11.91	4.41
NM_002311,NM_013975	DNA ligase 3 isoform beta precursor	0	3.37	2.9	2.13	3.68	1.84	2.02	0.25	1.01	1.29	2.85	0.98	1.7	2.31	1.1	5.6	2.66	4.3	1.45	1.39	1.86	2.48	2.46	1.03	1.49	3.13	2.95	4.92	3.23	0.28	1.69	2.68	2.79	2.72	5.11	1.56	1.35	3.7	3.65	5.54	3.24	1.59	1.39	6.44	2.43	4.23	6.24	3.12
NM_002312,NM_001098268,NM_206937	DNA ligase 4	0	1.69	0.89	0.07	0.59	0.49	0.06	0.31	0.39	1.36	2.07	0.18	1.13	0.93	0.42	2.24	1.28	1.53	0.48	0.42	0.46	1.06	1.02	0.06	0.17	0.24	0.22	3.53	1	0.03	0.59	0.61	0.92	1.97	3.88	1.66	3.11	2.82	24.79	4.6	4.89	1.42	1.07	2.58	2.14	0.89	0.96	4.16
NM_001034024,NM_001034023,NM_019100	DNA methyltransferase 1-associated protein 1	0	17.56	10.75	11.98	18.16	9.81	11.55	8.14	5.33	13.14	24.11	10.99	12.2	30.27	8.98	20.58	14.29	16.18	8.38	7.96	16.85	11.86	10.61	9.45	18.96	21.61	21.48	43.51	36.92	9.31	12.12	19.43	12.85	15.23	18.08	20.26	11.72	20.2	21.56	20.22	20.25	12.64	12.67	31.83	20.48	16.56	48.25	15.75
NM_000249,NM_001167619,NM_001167617,NM_001167618	DNA mismatch repair protein Mlh1 isoform 1	0	7.42	7.15	5.59	7.24	5.68	4.36	1.68	6.19	5.93	20.16	1.37	7.96	6.66	2.85	17.86	5.97	10.07	3.81	3.23	4.22	7.22	6.48	2.37	3.91	4.42	6.56	13.58	8.64	0.8	5.8	9.33	10.41	8.42	23.44	6.52	6.88	12.45	24.16	12.72	10.99	6.17	4.82	16.78	9.67	17.04	19.69	8.45
NM_001040108,NM_014381	DNA mismatch repair protein Mlh3 isoform 1	0	0.99	0.5	0.26	0.99	1.68	0.23	0.18	0.16	0.5	1.97	0.29	0.77	2.5	0.33	2.92	0.91	1.29	0.51	0.53	0.41	0.84	0.68	0.17	0.74	0.58	0.51	3.42	1.2	0.2	0.31	0.61	1.58	0.97	1.11	0.66	0.36	2.27	2.89	1.48	0.64	0.47	0.31	1.13	1.42	0.65	2.21	1.25
NM_000251	DNA mismatch repair protein Msh2	0	0.89	2.81	1.09	1.23	1.99	0.58	0.14	4.59	1.38	4.6	0.38	3.81	1.3	1.58	4.71	1.03	5.97	2.44	0.8	0.89	4.18	2.54	0.37	0.71	1.09	2.19	12.09	1.35	0.07	1.43	1.98	3.24	2.01	8.12	1.11	2.72	7.53	3.52	7.08	1.97	0.88	0.46	10.53	3.33	6.89	4.31	4.21
NM_002439	DNA mismatch repair protein Msh3	0	1.42	0.98	0.43	1.67	0.83	0.29	0.42	1.09	0.99	2.88	0.14	1.64	2.41	0.53	2.49	0.51	1.54	0.67	0.49	0.79	1.46	1.9	0.29	0.29	0.38	0.59	1.75	0.5	0.03	0.93	1.29	1.03	1.51	3.12	1.08	1.61	1.36	1.84	2.75	1.86	0.92	0.39	3.11	1.46	1.17	1.73	1.68
NM_000179	DNA mismatch repair protein Msh6	0	7.61	4.51	2.14	4.09	3.87	1.62	0.8	4.76	5.29	13.26	0.73	4.43	5.46	1.34	8.54	3.29	6.4	1.59	1.64	1.52	4.64	4.25	0.8	1.61	1.68	3.34	10.82	2.7	0.14	2.19	4.16	13.57	4.01	15.26	4.67	13.42	7.09	13.03	14.3	4	1.92	2.5	11.75	4.11	11.3	6.41	4.66
NM_004088,NM_001017520	DNA nucleotidylexotransferase isoform 1	1	0	0	0	0	0	0	0	0	0	0	0.09	0	0	0.04	0.05	0	0.03	0.01	0	0	0	0	0	0	0.08	0	0	0	0	0	0	0	0	0	0	0	0.22	0.13	0	0.04	0.02	0	0	0.26	0.17	0.11	0
NM_016937	DNA polymerase alpha catalytic subunit	0	0.75	0.77	0.73	0.63	0.74	0.36	0.1	1.53	0.08	0.83	0.12	1.38	0.65	0.24	1.1	0.4	2.01	0.46	0.38	0.29	0.98	0.73	0.58	0.41	0.66	0.55	2.14	1.81	0.02	1.11	1.13	1.78	0.93	3.31	0.86	0.33	2.16	1.01	1.94	1.18	0.47	0.51	3.71	1.13	3.02	2.13	0.61
NM_002689	DNA polymerase alpha subunit B	0	2.65	4.17	5.55	4.33	3.34	4.03	1.3	2.87	0.68	4.63	0.91	4.92	4.26	2.26	8.65	2.26	8.63	2.37	1.94	1.6	4.54	3.9	5.04	7.29	4.87	4.62	12.77	6.63	1.28	3.4	6.47	11.84	3.98	10.19	2.37	0.52	9.51	5.23	10.06	4.01	2.49	2.48	11.85	5.86	12.42	8.62	3.62
NM_002690	DNA polymerase beta	0	4.72	15.86	24.91	9.23	34.08	16.35	2.43	6.83	14.28	10.57	4.45	28.15	26.19	8.15	76.37	25.79	22.38	7.97	18.12	21.83	16.36	28.38	8.04	10.47	25.48	13.55	157.39	47.83	1.76	3.93	16.03	114.59	33.98	34.79	22.75	46.93	48.25	79.96	152.63	46.56	12.27	11.14	14.92	25.56	20.3	31.63	41.28
NM_002691	DNA polymerase delta catalytic subunit	0	4.65	5.41	5.77	7.45	4.61	2.89	2.55	5.96	3.34	5.31	3	3.3	11.48	3.6	6.76	2.36	9.69	3.53	2.84	5.26	5.54	4.49	6.93	8.61	7.99	8.76	19	11.08	2.7	8.58	7.38	3.92	1.4	2.63	3.03	4.86	8.15	3.93	8.4	4.43	2	2.38	15.74	7.67	5.11	6.38	4.92
NM_001127218,NM_006230	DNA polymerase delta subunit 2	0	9.37	14.93	12.23	12.78	11.58	10.1	3.95	9.65	2.29	14.45	4.99	7.74	14.9	6.32	20.19	5.39	16.5	4.67	3.73	8.54	12.93	6.07	13.8	16.82	21.3	20.59	27.72	16.31	2.67	13.08	17.9	9.34	6.24	18.83	6.82	2.84	19.45	11.67	17.16	11.99	6.35	7.78	22.83	15.33	19.16	21.76	12.26
NM_006591	DNA polymerase delta subunit 3	0	2.65	2.45	1.99	3.58	3	1.33	0.43	2.16	1	3.74	0.25	2.46	2.31	1.17	7.28	2.94	4.71	1.68	1.77	1.22	3.05	3.45	0.73	0.6	1.26	2.55	6.65	4.93	0.5	2.12	3.48	9.18	3.94	5.97	1.23	0.97	7.85	8.12	12.87	4.7	1.79	1.42	6.41	3.14	6.24	5.93	4.71
NM_021173	DNA polymerase delta subunit 4	0	155.53	71.67	103.42	168.18	162.91	85.9	89.3	63.14	55.68	151.44	249.03	161.33	635.49	93.65	269.77	238.09	127.53	73.33	96.71	126.27	136.82	194.23	69.77	252.16	236.85	144.83	452.07	461.46	105.7	84.22	212.1	251.43	307.76	135.03	87.95	97.12	134.96	172.26	211.58	115.95	86.61	60.26	218.98	367.61	69.03	280.85	122.86
NM_006231	DNA polymerase epsilon catalytic subunit A	0	2.87	1.86	2.07	2.38	2.21	1.63	0.66	1.35	1.3	4.15	0.78	1.5	4.07	1.31	3.54	1.59	3.2	1.45	0.82	3.16	2.36	3.23	1.8	2.92	2.78	3.63	6.5	4.23	0.67	2.68	1.95	2.17	1.43	2.8	1.56	0.89	4.29	2.69	4.42	2.37	1.31	1.36	6.41	3.62	4.69	3.49	2.86
NM_002692	DNA polymerase epsilon subunit 2	0	0	1.45	0.53	0	0.6	0.57	0.17	4.15	0.21	1.84	0.17	1.64	0	0.47	2.05	0.42	2.47	0.43	0.16	0.49	2.72	1.37	0.3	0.62	0.6	0.65	1.93	0	0.02	0.23	1.44	2.37	0.18	11.59	1.16	0.05	2.97	0.67	4.16	1.95	0.66	0.66	3.07	0.45	5.17	0.85	0.38
NM_017443	DNA polymerase epsilon subunit 3	0	21.59	7.11	5.04	8.16	6.85	4.03	2.06	8.22	25.69	53.36	1.65	8.2	16.57	3.31	22.45	4.62	14.44	7.2	2.92	4.47	8.48	5.9	2.22	4.29	8.28	5.71	31.79	8.42	0.6	10.5	10.93	6.16	5.02	27.79	15.76	21.93	17.29	30.82	17.72	17.09	10.98	10.7	21.31	15.43	15.24	20.11	11.89
NM_019896	DNA polymerase epsilon subunit 4	0	32.02	19.79	24.43	23.55	67.83	22.44	64.11	41.22	20.13	41.37	41.6	80.3	154.57	56.25	242.5	95.03	52.78	29.74	28.75	58.36	79.57	72.81	17.77	61.92	68.83	39.89	246.98	139.52	35.99	28.3	94.88	123.53	117.96	174.09	79.81	48.61	80.68	96.42	112.9	107.62	69.21	35.23	29.89	79.36	46.56	88.62	40.72
NM_006502	DNA polymerase eta	0	0.53	0.93	0.57	1.22	0.62	0.73	0.09	0.34	0.4	1.32	0.17	0.65	0.46	0.27	1.44	0.68	1.32	0.57	0.35	0.43	0.76	0.79	0.27	0.66	0.73	0.83	3.68	1.33	0.17	0.31	1.11	0.96	1.25	1.68	1	0.64	1.89	1.14	1.67	0.67	0.28	0.38	2.53	1.2	1.91	3.4	1.19
NM_007195	DNA polymerase iota	0	0.63	0.46	0.06	0.35	0.53	0.04	0.09	0.27	0.32	0.62	0	0.52	2.5	0.24	2.22	0.4	1.06	0.7	0.18	0.64	0.76	0.97	0.07	0.14	0.23	0.33	0.45	0	0.01	0.29	0.38	0.46	0.68	1.72	0.5	0.41	1.77	2	2.68	1.37	0.56	0.29	1.56	1	0.39	0.48	0.99
NM_016218	DNA polymerase kappa	0	1.47	0.93	0.23	1.86	1.61	0.19	0.18	0.89	1.12	2.45	0.17	1.25	0.74	0.26	2.85	0.89	1.41	0.67	0.47	0.47	1.23	1.31	0.06	0.07	0.5	0.35	1.69	0.48	0.07	0.64	0.6	1.53	1.33	2	1.25	2.11	3.41	7.51	5.32	2.79	1.27	0.58	2.04	1.81	1.36	1.11	2.14
NM_013274,NM_001174085,NM_001174084	DNA polymerase lambda isoform a	0	38.47	5.7	5.82	15.56	31.95	6.21	8.39	3.35	17.55	38.67	62	6.68	108.94	6.23	27.66	45.73	9.89	7.95	13.96	7.78	10.54	9.73	5.28	34.16	13.07	12.12	30.78	23.9	7.29	6	12.76	10.92	60.94	13.33	6.37	8.45	30.75	15	18.59	9.83	7.9	9.69	30.62	67.97	7.6	59.52	11.93
NM_013284	DNA polymerase mu	0	6.58	6.42	4.97	11.03	5.54	3.92	1.34	2.06	5.21	10.8	3.74	5.71	20.92	4.25	15.42	7.51	11.51	6.6	5.65	9.23	5.14	8.83	3.32	9.54	12.44	7.75	24.2	18.93	2.1	6.26	9.43	6.77	12.33	10.09	6.96	3.62	12.3	12.43	11.48	8.84	7.07	6.36	12.42	16.79	6.02	26.44	11.84
NM_181808	DNA polymerase nu	1	0	0.12	0.17	0.08	0	0.4	0.01	0.13	0.1	0.68	0.03	0.19	0.65	0.24	0.27	0.07	0.29	0.1	0.07	0.26	0.31	0.09	0.26	0.48	0.49	0.4	0.83	0.48	0.04	0.13	0.15	0.24	0.22	0.46	0.05	0.03	0.19	0.67	0.34	0.09	0.07	0.08	0.16	0.61	0.37	0.48	0.18
NM_001171805,NM_006999,NM_001171806	DNA polymerase sigma isoform 2	0	10.38	2.25	1.07	4.58	3.55	0.97	1.17	1.54	8.92	13.31	1.95	4.12	12.59	1.47	4.95	1.82	4.54	2.59	1.48	3.17	3.29	3.08	0.53	2.07	2.67	2.27	13.37	6.37	0.29	5.16	3.34	3.07	2.72	7.72	6.95	13	7.62	18.29	6.35	6.04	4.06	4.65	7.92	9.19	2.67	7.77	7.55
NM_002693,NM_001126131	DNA polymerase subunit gamma-1	0	16.36	8.18	8.61	24	11.14	5.41	4.42	3.92	5.83	27.17	5.18	8.66	15.73	5.39	15.17	8.93	12.69	6.18	4.14	8.66	9.79	9.09	3.92	12.17	12.66	16.6	38.91	19.91	2.24	10.51	9.98	12.23	9.21	18.37	11.87	6.33	19.63	18.61	18.77	12.48	7.34	6.66	26.24	16.73	12.88	27.29	15.3
NM_007215	DNA polymerase subunit gamma-2, mitochondrial	0	1.18	1.79	2.86	6.12	3.8	1.18	1.04	1.18	1.72	1.02	1.17	3.1	5.83	1.26	4.7	2.61	2.9	1.26	2.12	2.55	3.59	2.52	0.54	0.22	3.19	1.24	11.21	9.62	0.34	1.13	2.78	3.86	2.44	4.95	3.63	8.05	5.05	12.81	8.38	4.99	2.26	1.57	3.85	4.4	2.2	3.74	2.96
NM_199420	DNA polymerase theta	0	0.1	0.26	0.21	0.06	0.1	0.07	0.04	0.38	0.1	0.41	0.06	0.33	0.19	0.08	0.41	0.02	0.33	0.06	0.02	0.09	0.33	0.3	0.06	0.05	0.11	0.22	0.26	0	0.03	0.2	0.05	0.18	0.11	1.15	0.2	0.08	0.28	0.19	0.52	0.19	0.05	0.12	0.84	0.13	0.97	0.11	0.14
NM_002912	DNA polymerase zeta catalytic subunit	0	0.67	0.37	0.16	0.86	0.32	0.07	0.06	0.63	1.02	1.56	0.18	0.45	0.37	0.09	0.98	0.09	0.66	0.45	0.2	0.3	0.32	0.47	0.03	0.21	0.18	0.13	0.28	0.24	0.03	0.37	0.45	0.18	0.43	1.64	0.6	1.83	1	2.73	1.27	0.94	0.67	0.28	1.77	0.87	0.61	1.16	0.91
NM_000947	DNA primase large subunit	0	0.14	1.4	0.98	1.65	1.07	0.68	0.35	1.18	0.16	1.69	0.16	0.93	1.48	0.49	1.57	0.86	2.09	0.58	0.38	0.33	1.2	0.86	0.18	1.83	0.66	0.55	2.12	1.24	0.08	0.42	1.06	1.97	0.54	5.07	1.56	0.49	2.19	1.59	3.31	1.61	0.9	0.6	3.01	0.97	3.73	2.44	0.99
NM_000946	DNA primase small subunit	0	1.52	2.78	0.64	1.37	1.79	0.93	0.5	5.82	1.1	5.47	0.25	5.48	5	1.86	7.74	1.35	7.76	2.27	1.5	1.46	6.61	4.14	1.17	0.95	1.77	2.83	3.79	3.56	0.29	3.66	6.29	2.76	1.86	21.82	2.63	2.88	6.17	4.72	9.94	5.4	1.42	1.03	8.81	3.43	9.87	6.35	2.36
NM_003579,NM_001142548	DNA repair and recombination protein RAD54-like	0	0.79	1.71	1.46	0.35	0.45	0.96	0.5	1.14	0.17	1.03	0.3	1.28	0	0.51	1.21	0.23	1.66	0.5	0.29	0.6	1.28	0.99	1.05	0.71	0.95	1.7	2.65	0.2	0.16	1.53	1.47	1.73	0.97	3.49	1.16	0.4	1.52	0.7	2.44	1.16	0.39	0.51	3.4	0.55	5.37	1.9	0.59
NM_012415	DNA repair and recombination protein RAD54B	0	0	0.31	0.15	0	0.27	0.05	0.08	0.5	0.03	0.41	0.03	0.42	0.19	0.01	0.62	0.07	0.72	0.23	0.02	0.06	0.5	0.4	0.08	0.52	0.18	0.1	0	0	0	0.09	0.25	0.15	0	0.83	0.18	0.14	0.46	0.35	0.78	0.33	0.12	0.01	0.51	0.1	1.38	0	0.26
NM_005236	DNA repair endonuclease XPF	0	0.29	0.23	0.17	0.57	0.24	0.09	0.02	0.19	0.23	0.65	0.07	0.24	0.28	0.15	0.84	0.12	0.51	0.22	0.11	0.12	0.42	0.2	0	0	0.15	0.28	0.73	0.22	0.02	0.22	0.37	0.31	0.43	1.31	0.15	0.38	1.07	0.67	1.36	0.48	0.28	0.15	0.9	0.49	0.58	0.48	0.26
NM_005732	DNA repair protein RAD50	0	0.63	1.25	0.35	1.47	2.1	0.44	0.11	1.82	0.18	2.04	0.14	2	2.87	1.2	3.98	0.82	2.85	1.22	0.49	0.97	3.06	1.86	0.27	0.8	1.19	0.61	3.72	1.31	0.18	0.75	1.13	1.77	1.47	3.83	0.9	0.5	3.49	1.84	4.43	2.55	1.31	0.49	4.29	2.07	1.91	2.95	1.66
NM_002875,NM_001164270,NM_133487,NM_001164269	DNA repair protein RAD51 homolog 1 isoform 1	0	0.96	2.44	2.35	0.05	1.05	1.33	0.31	3.38	0.35	1.46	0.45	1.77	1.11	0.56	2.53	0.23	3.97	0.7	0.51	0.66	3.03	2.12	1.75	2.11	1.35	2.78	2.52	0.48	0.17	2.18	2.14	4.12	1.18	7.3	1.34	0.56	4.41	2.03	5.57	1.79	0.75	1.03	6.31	0.87	11.11	1.96	0.68
NM_133509,NM_133510,NM_002877	DNA repair protein RAD51 homolog 2 isoform 3	0	0.94	0.58	0.6	0.54	0.53	0.35	0.21	1.24	0.06	1.69	0.28	1.32	1.02	0.43	1.3	0.75	1.2	0.43	0.24	0.37	0.77	1.55	0.16	0.52	0.77	0.44	0.81	1.53	0.19	0.53	0.47	1.6	0.57	2.92	1.09	0.94	1.89	1.87	1.95	1.07	0.99	0.57	1.79	2.07	1.26	1.79	1.4
NM_002876,NM_058216	DNA repair protein RAD51 homolog 3 isoform 2	0	2.94	3.32	1.14	1.99	3.94	1.86	0.47	6.71	0.83	7.68	0.29	6.79	5.18	1.86	8.89	0.56	8.25	1.91	1.38	1.5	8.51	4.36	2.27	4.2	3.56	1.93	7.32	2.81	0.52	1.06	4.33	7.21	2.58	26.44	3.57	1.4	5.65	7.55	11.6	4.19	3.71	1.88	11.59	6.05	9.08	6.89	4.4
NM_002878,NM_001142571,NM_133629	DNA repair protein RAD51 homolog 4 isoform 1	0	1.4	2.07	2.75	2.56	2.69	1.48	0.33	1.11	0.11	2.32	0.42	1.73	0.28	1.03	2.99	1.1	2.77	1.22	0.67	1.77	2.11	2.08	1.16	1.69	2.85	2.55	8.04	2.6	0.46	1.2	2.28	1.43	1.94	3.25	0.6	0.66	3.92	2.12	3.73	1.34	0.87	0.4	4.59	1.81	4.82	3.57	1.39
NM_134424	DNA repair protein RAD52 homolog	0	0.36	1.08	0.56	1.45	1.05	0.42	0.27	0.22	0.82	0.89	0.11	1.39	1.94	0.54	3.66	1.56	1.49	0.86	0.38	1.9	1.33	1.2	0.36	0.71	0.7	0.7	5.84	1.11	0.32	0.31	2.13	1.23	6.17	0.94	1.08	1.89	2.44	0.22	4.18	0.4	0.64	0.34	1.89	2.04	0.78	2.7	1.76
NM_001037872,NM_016316	DNA repair protein REV1 isoform 2	0	3.44	1.22	0.32	1.4	2.21	0.46	0.9	1.69	4.3	9.54	0.88	2.26	8.52	0.89	4.5	1.8	2.87	1.83	0.84	1.97	1.61	2.16	0.17	0.69	1.71	1.11	3.32	1.66	0.16	1.58	1.87	1.54	1.47	5.65	3.32	5.3	3.86	5.49	4.04	3.47	2.14	1.71	4.35	4.95	1.89	3.35	3.28
NM_006297	DNA repair protein XRCC1	0	5.06	7.25	10.09	23.57	9.77	8.05	2.66	2.37	3.88	5.87	3.15	4.19	8.79	4.61	10.92	7.3	11.39	5.55	5.72	7.3	6.65	5.45	7.89	11.96	13.71	13.79	25.76	29.47	4	7.06	10.88	13.05	15.66	8.55	6.37	4.72	21.07	10.37	16.4	9.48	6.41	6.57	20.49	15.43	12.9	29.7	10.31
NM_005431	DNA repair protein XRCC2	1	0.1	0.13	0.06	0	0.2	0	0.01	0.04	0	0.13	0	0.04	0.19	0.02	0.25	0	0.19	0.07	0.02	0.13	0.09	0.08	0.03	0.17	0.02	0.14	0	0	0.03	0.27	0	0	0	0.58	0.05	0	0.15	0.19	0.36	0.15	0.01	0.04	0.25	0.16	0.3	0	0.1
NM_001100118,NM_001100119,NM_005432	DNA repair protein XRCC3	0	5.95	6.49	4.33	6.13	6.42	2.47	0.96	3.22	1.71	4.91	1.38	2.55	8.98	1.72	6.51	3.22	7.63	3.31	2.25	5.21	5.79	4.09	2.98	6.64	6.28	7.13	15.89	5.8	0.68	3.39	5.02	4.21	1.36	3.83	2.44	1.1	6.72	5.01	6.57	4.23	1.71	3.57	5.39	7.67	3.52	3.35	6.19
NM_022550,NM_003401,NM_022406	DNA repair protein XRCC4 isoform 1	0	0.92	1.66	0.55	0.85	3.45	0.36	0.17	2.85	0.83	1.4	0.44	3.24	2.68	1.07	7.36	2.24	2.88	1.8	1.64	0.45	4.07	4.65	0.13	0	0.42	0.74	5.52	1.57	0.21	0.68	1.64	4.87	2.11	10.15	1.11	0.25	2.13	18.04	14.99	5.26	2.07	1.14	4.68	3.69	2.83	2.41	4.62
NM_000380	DNA repair protein complementing XP-A cells	0	4.26	3.03	1	1.51	3.29	0.42	0.68	3.11	2.05	8.22	0.76	5.15	10.74	2.29	12.68	4.06	5.96	2.11	1.35	2.35	5.76	4.96	0.81	3.42	2.75	1.37	9.07	3.62	0.77	3.11	2.6	4.19	1.83	9.4	6.14	3.15	7.78	7.13	6.68	5.47	2.5	2.31	8.84	3.4	2.73	4.91	3.41
NM_000123	DNA repair protein complementing XP-G cells	0	9.32	4.91	2.45	10.53	5.16	2.86	1.35	2.56	8.66	14.37	1.52	6.77	16.38	3.23	9.61	6.34	8.63	4.28	3.39	4.46	5.88	6.66	1.47	3.13	4.06	4.84	16.99	7.59	0.4	4.44	5.06	10.15	5.2	6.27	4.65	6.66	11.52	16.77	13.05	8.29	3.97	5.53	17.81	9.93	6.53	17.67	8.94
NM_021067	DNA replication complex GINS protein PSF1	0	0.1	0.73	0.29	0.07	0.73	0.15	0.06	0.49	0.08	0.38	0	0.88	0	0.15	1.09	0.12	1.2	0.23	0.18	0.14	0.91	0.49	0.28	0	0.05	0.39	1.41	0.15	0	0.49	0.59	1.08	0.47	5.91	0.14	0.08	1.62	1.01	2.06	0.57	0.18	0.17	1.86	0.52	3.25	0.57	0.19
NM_016095	DNA replication complex GINS protein PSF2	0	1.59	4.93	5.82	0.47	2.57	3	4.03	11.61	0.82	6.55	1.9	6.11	2.78	1.61	10.5	0.61	8.37	1.63	1.18	1.2	9.45	5.62	5.74	6.91	4.84	3.93	11.66	0.79	0.26	5.72	9	13.85	1.79	33.24	5.24	0.72	6.13	6.31	13.12	4.1	2.03	2.19	12.18	1.49	20.45	4.17	0.97
NM_001126130,NM_001126129,NM_022770	DNA replication complex GINS protein PSF3	0	1.45	1.41	0.61	0.42	1.01	0.57	0.1	1.85	0.74	3.96	0.15	0.91	0.83	0.35	2.1	0.3	2.5	0.48	0.18	0.33	1.53	1.2	0.5	0.14	0.8	1.85	1.3	1.05	0.13	0.97	1.13	2.67	0.25	4.72	0.42	2.51	2.19	1.74	2.79	1.83	0.44	0.72	4.16	0.84	3.9	1.56	0.63
NM_032336	DNA replication complex GINS protein SLD5	0	0.89	0.96	0.51	0.03	0.63	0.38	0.16	1.04	0.16	1.75	0.15	0.55	0.37	0.1	0.55	0.37	1.25	0.35	0.05	0.71	1.03	0.55	0.42	0.64	0.66	1.04	1.48	0.61	0.02	0.9	0.96	0.92	0.54	2.48	1.16	0.69	0.88	2.79	1.81	1.42	0.66	0.49	2.63	0.39	2.22	0.74	0.4
NM_030928	DNA replication factor Cdt1	0	9.03	5.43	5.81	0.54	3.46	3.72	3.71	8.24	3.12	11.26	3.66	3.89	1.94	1.92	5.67	1.14	7.83	1.75	1.28	2.39	5.27	3.55	9.28	9.99	6.24	8.34	11.4	2.68	0.62	12.35	5.29	5.76	0	3.67	3.14	1.37	3.62	3.71	6.21	2.91	0.75	3.01	9.78	2.33	5.28	1.84	1.01
NM_004526	DNA replication licensing factor MCM2	0	9.13	7.52	7.49	2.87	4.53	4.39	0.9	7.68	2.22	15.14	1.36	5.28	4.44	1.85	8.17	1.05	15.03	3.06	2.37	2.51	7.23	5.28	6	5.41	5.9	12.15	16.54	3.29	0.23	16.31	7.94	8.35	3.15	16.22	4.39	0.97	10.06	8.28	13.61	6.96	3.26	4.89	33.31	4.95	23.16	6.58	3.76
NM_002388	DNA replication licensing factor MCM3	0	9.66	11.11	10.81	12.33	9	7.34	1.49	9.34	3.07	16.28	2.04	9.28	8.05	3.39	12.19	4.64	21.29	6.85	4.58	4.03	9.08	7.16	6.71	10.99	9.67	15.36	38.87	9.86	0.57	12.32	11.3	11.33	6.34	20.66	4.39	1.54	23.41	12.14	22.81	8.47	4.33	5.76	54.07	9.48	42.56	30.1	10.61
NM_005914,NM_182746	DNA replication licensing factor MCM4	0	7.44	5.03	4.71	1	2.51	1.8	0.37	6.13	0.86	7.39	0.42	2.83	0.37	1.16	5.59	0.35	10.43	2.1	1.36	1.37	4.44	2.43	2.31	3.73	2.46	5.98	6.74	1.24	0.07	9.42	4.42	3.48	1.54	13.66	2.36	0.77	6.99	5.93	12.85	5.56	2.63	3.04	23.65	2.98	22.07	4.17	2.59
NM_006739	DNA replication licensing factor MCM5	0	25.73	18.24	22.84	22.21	12.59	15.53	7.66	16.41	11.51	45.19	10.77	12.02	21.75	8.9	23.54	9.07	30.19	11.04	8.91	10.52	14.81	14.55	25.59	32.93	30.39	35.16	44.88	44.3	4.91	35.51	24	14.03	11.86	21.06	22.79	9.84	30.42	20.58	29.65	20.55	10.31	16.15	88.43	26.17	46.34	46.07	20.31
NM_005915	DNA replication licensing factor MCM6	0	9.54	9.61	6.62	3.93	3.71	4.37	1.72	13.21	11.68	31.13	2.02	9.91	7.03	2.97	11.42	1.94	15.4	3.77	2.87	1.85	9.65	6.55	3.1	3.53	3.41	5.67	13.97	2.33	0.19	8.83	10.62	15.41	4.87	36.44	13.17	9.23	15.89	14.74	24.09	11.11	5.52	6.39	27.64	6.15	34.58	14.58	6.08
NM_182776,NM_005916	DNA replication licensing factor MCM7 isoform 2	0	40.09	23.47	26.88	15.72	23.06	20.54	8.28	18.08	28.55	74.3	13.77	15.41	38.87	8.74	27.04	9.96	38.98	14.42	9.29	17.09	24.03	18.28	27.82	31.6	28.86	34.44	67.94	25.23	3.46	43.33	29.07	26.59	21.97	45.51	29.74	26.4	48.36	37.76	49.7	26.57	15.41	25.81	86.62	22.97	85.62	57.84	21.29
NM_032485,NM_182802	DNA replication licensing factor MCM8 isoform 1	0	0.77	1.11	0.31	0.36	0.06	0.57	0.08	1.32	0.15	1.05	0.1	1.18	0.37	0.22	1.53	0.44	2.07	0.49	0.32	0.5	1.28	0.87	0.18	0.52	0.32	0.61	1.3	1.09	0.02	0.62	0.5	1.91	0.32	4.78	0.42	0.11	1.07	1.49	2.41	1.48	0.39	0.38	3.27	0.74	2.98	0.88	1.13
NM_153255	DNA replication licensing factor MCM9	0	1.52	0.18	0.13	0.81	0.24	0.09	0.25	0.48	0.43	2.11	0.23	1	1.11	0.34	0.5	0.07	0.8	0.31	0.28	0.76	0.37	0.28	0.08	0.57	0.57	0.23	0	0.63	0	0.7	0.25	0.29	0.25	0.66	0.93	1.07	1.18	5.36	1.63	1.82	0.85	0.59	1.5	1.42	0.45	0.74	1.27
NM_003286	DNA topoisomerase 1	0	23.68	8.26	6.19	17.64	8.8	3.12	0.74	2.7	5.84	19.35	2.02	4.4	6.85	2.03	13.8	4.83	6.78	2.4	4.24	2.99	5.08	4.54	0.66	1.9	2.58	9.28	41.67	12.37	0.31	5.27	3.51	20.48	5.52	15.24	6.54	11.88	14	54.03	30.97	16.12	4.93	5.29	16.71	9.58	9.09	8.09	16.39
NM_001067	DNA topoisomerase 2-alpha	0	2.46	2.73	1.04	0.15	1.68	0.54	0.13	7.58	0.97	3.66	0.41	3.72	0.19	0.73	2.81	0.21	5.08	1	0.48	0.28	2.86	2.64	0.61	0.54	0.46	1.51	3.72	0.09	0.03	1.3	1.76	1.97	1.15	20.98	1.63	1.15	3.53	3.11	8.16	3.64	0.87	0.93	11.04	1.75	11.76	1.5	0.8
NM_001068	DNA topoisomerase 2-beta	0	9.97	7.23	2.82	6.99	9.55	2.4	1.64	5.63	15.21	33.11	2.26	12.57	16.94	4.36	23.52	6.23	15.72	7.67	3.98	4.87	8.24	8.94	1.4	2.14	4.34	5.21	18.12	4.97	0.28	4.3	7.2	12.72	8.5	26.31	7.99	19.22	21.7	27.84	28.54	22.32	7.97	4.64	34.54	18.67	11.93	25.36	15.14
NM_007027	DNA topoisomerase 2-binding protein 1	0	5.11	2.44	1.18	2.85	2.41	0.92	0.49	3.6	4.25	10.51	0.32	2.98	2.22	1.01	4.82	2.24	5.44	2.12	1.14	1.95	2.66	2.87	0.48	1.52	1.67	2.18	5.67	1.66	0.07	2.83	1.71	3.77	2.08	11.03	4.82	7.49	5.92	13.16	10.03	7.38	2.83	2.39	10.17	4.66	4.93	4.91	5.25
NM_004618	DNA topoisomerase 3-alpha	0	3.81	3.8	4.11	12.22	3.38	2.42	0.68	0.91	1.62	6.5	0.55	1.52	2.87	1.65	4.96	3.24	4.6	2.51	3.54	2.58	2.8	3.49	1.69	4.34	5.89	4.62	13.43	9.2	1.16	2.48	4.92	3.46	6.49	3.82	2.66	1.6	5.44	7.1	7.73	3.18	2.41	4.14	7.76	5.27	4.55	9.87	5.79
NM_003935	DNA topoisomerase 3-beta-1	0	4.05	3.09	3.13	4.45	2.72	1.57	0.36	0.99	2.2	8.65	0.45	1.13	4.63	1.86	5.18	3.15	3.74	2.64	1.79	4.03	3.16	3.54	1.33	3.08	5.18	5.56	13.65	7.61	0.61	3.29	2.92	0.68	2.62	3.39	1.82	1.7	4.62	6.56	6.77	4.12	2.45	2.77	6.34	5.86	2.89	6.07	5.79
NM_052963	DNA topoisomerase I, mitochondrial precursor	0	8.89	2.73	2.75	5.4	5.61	2.74	1.54	0.89	5.81	7.71	5.24	2.16	8.61	1.66	6.14	3.68	4.76	2.33	1.74	4.2	2.07	2.56	1.59	5.46	5.1	5.12	20.24	8.2	0.88	4.45	4.55	4.34	4.23	4.21	4.87	6.41	10.52	6.66	5.54	3.98	3.48	3.77	5.85	9.28	3.12	13.67	8.87
NM_080648,NM_080649,NM_001641	DNA-(apurinic or apyrimidinic site) lyase	0	27.15	28.47	25.68	34.31	30.87	24.5	9.95	25.17	41.73	71.12	12.72	31.18	63.49	13.55	52.05	17.14	52.05	23.13	14.44	19.57	34.12	27.38	15.02	30.73	42.9	30.28	98.21	25.67	5.69	37.31	52.89	38.37	47.96	94.72	39.68	38.81	96.69	44.04	56.74	33.04	20.24	19.25	68.45	42.09	56.63	107.63	35.11
NM_014481	DNA-(apurinic or apyrimidinic site) lyase 2	0	4.12	6.39	9.4	15.9	8.47	8.22	0.49	3.51	2.28	11.02	1.61	4.42	5.65	4.54	14.73	5.39	11.25	5.19	3.71	4.65	7.09	6.63	4.48	9.3	7.45	11.44	33.07	26.13	1.16	4.85	9.68	7.06	5.45	7.29	1.97	1.64	11.03	6.98	14.95	6.01	4.41	3.35	18.09	10.09	14.63	22.64	6.35
NM_001015054,NM_001015052,NM_002434	DNA-3-methyladenine glycosylase isoform c	0	20.07	18.84	18.6	33.61	30.53	18.28	8.4	28.94	17.71	20.42	12.9	33.91	67.47	20.68	73.2	18.19	28.92	20.24	15.11	22.32	40.49	29.44	20.75	54.64	44.96	37.86	97.79	85.28	11.91	38.37	49.03	29.38	11.94	33.98	16.33	14.63	30.42	29.07	36.85	25.84	9.73	11.06	32.59	40.34	8.94	22.44	19.05
NM_133328	DNA-binding death effector domain-containing	0	87.52	26.08	162.58	164.88	62.24	34.26	20.35	15.05	67.9	79.49	54.67	26.93	97.46	27.54	67.51	100.02	46.19	37.87	55.99	37.01	29.28	56.93	26.92	85.42	105.39	59.15	374.09	485.19	8.55	39.75	51.89	66.18	78.36	29.73	38.09	53.62	51.15	84.18	117.28	44.56	25.14	85.82	45.51	84.89	32.04	112.28	93.39
NM_001145426,NM_003651	DNA-binding protein A isoform b	0	1456.93	15.52	12.85	78.69	359.61	24.22	29.05	9.37	162.81	310.24	82.02	49.27	514.7	10.13	135.7	412.54	19.01	29.12	98.07	46.93	26.5	41.64	5.04	360.76	29.58	137.64	171.35	132.61	7.12	14.31	19.31	40.3	624.59	52.92	77.36	126.33	234.34	156.63	148.65	116.97	47.18	61.07	523.52	806.78	28.05	229.33	76.5
NM_006060	DNA-binding protein Ikaros	0	21.78	13.84	16.98	41.02	18.88	7.87	3.84	9.31	26.8	53.82	4.3	15.74	31.1	7.13	35.72	20.31	24.52	11.83	7.31	7.82	12.07	17.38	3.11	8.11	11.2	11.82	63.71	23.38	1.45	9.25	17.79	40.27	21.29	32.66	20.62	45.8	37.71	58.59	43.89	21.66	11.26	9.33	42.09	30.7	24.2	42.1	45.87
NM_000635,NM_134433	DNA-binding protein RFX2 isoform a	0	2.67	2.32	1.29	6.38	1.28	0.93	0.61	0.69	2.11	1.24	0.18	1.59	0.46	0.33	2.53	2.38	1.31	0.84	2.67	1.83	0.96	3.67	0.44	1.73	2.08	2.55	6.31	3.73	0.61	2.3	1.8	8.11	4.3	0.83	2.63	1.66	2.04	18.64	3.73	6.04	2.3	3.44	0.97	2.3	1.06	1.39	7.96
NM_001025603,NM_000449	DNA-binding protein RFX5	0	13.95	9.98	6.89	12.71	10.42	6.37	1.76	6.55	6.15	20.26	2.99	7.48	12.4	4.04	18.93	6.44	17.35	6.83	5.46	8.22	9.58	8.18	2.56	8.05	11.12	10.24	48.67	22.57	2.38	8.62	14.14	20.39	9.36	23.51	7.49	12.2	21.3	44.45	29.45	23.48	12.6	4.97	23.73	16.56	10.89	20.77	15.37
NM_173560	DNA-binding protein RFX6	1	0	0	0	0	0	0	0	0	0	0	0	0	0	0	0	0	0	0	0	0	0	0	0	0	0	0	0	0	0	0	0	0	0	0	0	0.02	0	0	0	0	0	0	0	0	0	0	0
NM_022841	DNA-binding protein RFX7	0	2.05	0.56	0.11	0.68	0.56	0.08	0.29	0.7	4.09	6.52	0.27	1.28	1.2	0.32	1.26	0.47	1.61	0.73	0.18	0.45	0.6	0.41	0	0.22	0.21	0.24	0.9	0.26	0.1	0.57	0.62	0.42	0.5	3.91	1.98	4	3.89	3.84	1.9	1.82	0.97	0.51	3.78	2.75	1.31	2.01	1.57
NM_001145664	DNA-binding protein RFX8	0	0	0	0.09	0.06	0	0	0	0.08	0	0	0	0.03	0	0.02	0.12	0	0.04	0	0	0.02	0	0.03	0	0	0	0	0	0.46	0	0	0	0	0	0.18	0	0.05	0	0.16	0	0	0.02	0	0	0.13	0	0	0.12
NM_134440,NM_003721	DNA-binding protein RFXANK isoform b	0	39.24	27.53	33.53	57.04	37.99	36.4	35.99	19.6	28.9	44	59.39	38.69	77.01	25.3	65.52	62.66	37.38	21.52	26.03	32.59	37.55	37.73	24.76	87.07	84.47	43.35	110.47	162.92	37.76	35.43	56.02	61.89	88.93	50.31	30.65	34.75	67.01	72.35	62.04	51.12	30.17	29.7	63.27	85.44	34.96	98.86	33.39
NM_001131010,NM_002971,NM_001195470	DNA-binding protein SATB1 isoform 1	0	9.93	2.79	1.47	4.99	2.89	0.38	0.39	1.3	8.21	21.83	0.58	1.86	3.15	0.66	3.26	1.31	6.11	2.7	1.09	3.61	0.8	0.91	0.54	1.04	1.67	2.04	13.2	1.94	0.14	5.83	1.94	1.51	2.47	7.99	6.53	11.91	10.64	25.17	6.61	8.16	3.51	2.51	6.29	7.89	4.25	6.24	13.49
NM_001172509,NM_015265,NM_001172517	DNA-binding protein SATB2	1	0	0.01	0.02	0.12	0.04	0.04	0.03	0.02	0	0.02	0.02	0.08	0	0.05	0.39	0.12	0.04	0.03	0.05	0.07	0.1	0.05	0	0	0.06	0.05	0	0	0	0.01	0.04	0	0	0.1	0.03	0.04	0.04	0.29	0.29	0.1	0.09	0.03	0.1	0.23	0.04	0.11	0.07
NM_002180	DNA-binding protein SMUBP-2	0	6.41	5.33	4.65	5.38	3.93	2.19	1.02	1.46	3.83	6.3	1.91	3.16	8.98	1.92	12.52	4.87	5.57	2.43	3.71	6.84	4.84	3.9	2.26	6.59	6.05	8.98	18.35	8.59	1.03	3.38	4.07	12.8	4.01	3.46	3.11	3.42	4.55	19.94	13.77	8.07	3.39	3.73	5.92	9.35	4.18	8.45	5.76
NM_181353,NM_002165	DNA-binding protein inhibitor ID-1 isoform b	0	11.03	0.39	0.27	0.36	0.17	0.08	1.09	7.9	2.83	0.41	1.52	1.89	3.24	1.48	11.87	1.19	0.87	0.19	0.44	11.6	0.1	0.28	0.1	3.98	1.96	1.73	2.2	20.98	0.54	12.99	3.57	0	0.25	7.17	1.21	9.03	1.82	14.2	2.26	19.81	7.22	3.38	1.38	15.3	1.43	1.16	3.68
NM_002166	DNA-binding protein inhibitor ID-2	0	61.89	9.63	5.49	14.69	14.2	1.82	4.26	11.76	11.51	42.87	6.64	8.39	27.12	4.88	22.43	14.18	23.71	9.65	4.87	25.45	8.25	9.23	3.76	8.8	13.19	19.73	49.01	33.41	0.6	27.51	15.63	3.48	6.38	39.13	10.86	37.92	26.11	81.61	19.29	51.05	29.82	18.01	41.73	39.21	12.3	21.56	23.13
NM_002167	DNA-binding protein inhibitor ID-3	0	1.95	3.75	3.53	6.62	3.76	3.2	0.88	1.64	3.37	6.49	0.29	0.8	2.59	0.32	3.38	2.66	2.76	0.74	0.71	2.22	2.5	1.64	0.66	0.54	0.64	3.17	24.11	6.43	0.15	0.25	3.61	0.55	0.22	0.8	4.07	9.37	2	4.28	1.56	0.55	1.1	1.44	1.43	0.78	1.13	1.76	0.94
NM_001546	DNA-binding protein inhibitor ID-4	1	0	0	0	0	0	0	0	0	0	0	0	0	0	0	0	0	0	0	0	0	0	0	0	0	0	0	0	0	0	0	0	0	0	0	0	0	0	0	0	0	0	0	0	0	0	0	0
NM_006904,NM_001081640	DNA-dependent protein kinase catalytic subunit	0	3.59	1.7	1.3	3.6	1.53	0.87	0.26	1.47	1.21	3.04	0.39	2.2	1.67	0.89	4.14	1.61	2.85	1.17	1.19	0.68	1.9	1.55	0.6	1.12	1.32	1.98	4.62	3.05	0.1	1.32	2.29	2.79	5.3	9.6	2.48	1.61	4.61	5.07	7	2.68	2.08	1.35	9.48	4.72	5.06	5.87	6.7
NM_015425	DNA-directed RNA polymerase I subunit RPA1	0	1.47	1.05	0.97	2.03	1.58	0.49	0.02	0.24	0.48	2.42	0.08	0.49	0.19	0.28	0.85	0.37	0.78	0.26	0.23	0.33	0.46	0.33	0.21	1.02	0.8	1.29	4.66	0.57	0.16	0.5	0.52	0.42	0.39	0.76	0.84	0.25	1.01	1.08	1.61	0.43	0.14	0.29	2.37	0.65	1.13	1.48	1.05
NM_014596,NM_170783	DNA-directed RNA polymerase I subunit RPA12	0	1.47	1.66	2.51	2.19	0.94	2.25	0.14	0.23	0.72	0.87	0.76	1.14	0	0.55	1.81	2.52	2.9	0.76	1.12	0.72	3.03	2.34	0.91	2.23	1.39	2.7	8.75	7.28	0.45	0.9	2.43	8	1.4	2.59	1.26	1.2	2.85	2.57	4.25	0.73	0.91	0.65	4.98	1.75	4.81	6.21	2.25
NM_001137604,NM_019014	DNA-directed RNA polymerase I subunit RPA2	0	0.99	1.24	0.77	1.76	1.37	0.88	0.1	0.43	0.65	4.8	0.21	0.94	2.04	0.42	2.38	0.77	2.21	0.78	0.42	0.47	1.12	0.64	0.3	0.52	0.59	0.93	3.38	0.83	0.15	1.31	1.05	1.71	0.61	2.69	1.74	1.46	2.24	1.62	2.68	0.82	0.56	0.87	4.72	1.94	2.65	3.8	1.68
NM_012099	DNA-directed RNA polymerase I subunit RPA34	0	3.81	1.71	1.24	3.13	1.71	1.22	0.78	0.52	0.57	2.69	1.05	1.27	5.18	0.99	4.18	2.36	2.64	2.22	1.02	1.62	1.49	1.67	0.92	1.69	3.16	2.74	5.05	2.09	1.16	3.13	3.57	2.67	3.37	2.98	1.86	0.57	3.44	2.5	2.19	2.25	1.59	1.35	4.04	3.11	1.62	3.74	2.1
NM_001002926	DNA-directed RNA polymerase I subunit RPA43	0	9.59	1.01	0.46	0.45	1.19	0.25	2.97	1.83	5.76	19.86	4.67	2.47	2.87	0.45	3.65	1.31	2.37	0.78	0.43	1.29	1.79	0.91	0.11	0.99	0.71	0.48	4.36	0.37	0.15	1.59	1.01	1.95	1.94	9.61	4.51	7.73	3.62	16.8	3.38	3.71	2.72	1.65	4.04	4.3	3.35	2.81	3.12
NM_022490	DNA-directed RNA polymerase I subunit RPA49	0	4.89	3.57	2.34	3.75	2.28	2.54	1.48	3.21	6.02	10.94	1.46	3.3	6.76	1.84	5.71	0.77	6.62	2.79	0.98	1.83	4	2.22	1.9	4.39	3.86	2.99	10.78	2.62	0.21	4.58	3.82	4.98	2.26	10.57	6.92	4.34	7.29	6.25	5.7	2.36	2.2	2.92	8.07	5.66	8.05	9.96	5.19
NM_000937	DNA-directed RNA polymerase II subunit RPB1	0	25.9	12.75	19.12	56.49	11.03	11.64	1.29	2.23	3.99	12.35	1.26	4.73	10.55	3.43	12.11	11.45	11.63	5.44	9.44	11.44	4.82	7.67	5.68	10.63	16.66	32.49	43.6	55.92	1.98	8.46	9.05	21.79	15.02	8.02	10.3	11.96	17.32	38.36	27.42	12.51	11.72	15.42	48	21.19	18.38	37.84	25.72
NM_006234	DNA-directed RNA polymerase II subunit RPB11-a	0	38.21	12.18	14.94	22.44	24.77	10.37	14.94	22.89	22.32	32.52	18.06	41.74	49.33	16.86	47.76	28.47	24.6	14.47	14.73	18.92	22.58	20.34	14.65	38.58	39.95	22.74	80.31	60.26	7.51	15.68	22.73	39.73	29.43	23.57	21.49	23.13	28.66	61.03	35.04	31.59	9.16	18.87	23.01	35.3	7.84	20.4	26.23
NM_032959	DNA-directed RNA polymerase II subunit RPB11-b1	0	0.36	0.22	0.31	0.19	0	0	0.07	0.04	0.36	0.08	0.22	0.21	0.74	0.14	0.12	0	0.27	0.19	0.18	0.26	0.33	0.61	0.12	0	0.54	0.17	1.73	0.37	0	0.37	0.53	0.13	1.22	0.51	0.47	0	0.75	3.71	0.51	0.1	0.37	0.23	0.44	0.29	0.02	0.23	0.67
NM_001097615	DNA-directed RNA polymerase II subunit RPB11-b2	1	0	0	0	0	0	0	0	0	0	0	0	0.06	0	0	0	0	0.02	0	0	0.03	0.02	0	0	0	0	0	0	0	0	0	0	0	0.18	0	0.08	0	0	0	0	0	0	0.03	0	0	0.02	0.37	0.04
NM_000938	DNA-directed RNA polymerase II subunit RPB2	0	15.06	8.46	3.01	9.56	10.43	2.7	1.05	7.24	11.84	36.76	0.87	9.34	12.68	4.35	22.73	5.83	15.1	6.44	4.85	2.23	10.96	11.95	2.12	2.73	4.02	6.72	20.45	7.13	0.09	4.82	9.36	10.41	12.76	24.99	8.69	12.94	20.4	37.1	30.84	13.76	7.26	6.29	29.35	15.66	13.07	19.35	16.76
NM_032940	DNA-directed RNA polymerase II subunit RPB3	0	24.84	17.53	17.65	21.76	21.34	10.34	5.71	17.78	19.04	59.96	7.03	21.47	40.54	10.86	57.87	26.51	33.29	14.65	12	17.7	21.64	20.39	6.7	17.51	27.85	21.5	70.49	58.6	3.83	21.52	33.25	24.91	22.08	55.71	26.31	22.18	33.53	72.92	46.28	41.06	30	19.7	34.38	40.8	26.49	49.84	34.46
NM_004805	DNA-directed RNA polymerase II subunit RPB4	0	9.85	4.37	3.18	5.86	3.73	2.62	3.47	2.76	5.76	20.08	2.85	4.89	6.85	2.36	8.25	2.8	6.33	2.91	1.1	2.82	6.77	4.46	2	4.86	6.3	4.24	14.89	6.94	0.97	5.61	6.8	5.59	6.7	17.83	7.14	4.23	8.18	9.26	9.57	6.31	4.86	4.92	11.24	6.86	8.23	10.95	4.66
NM_002696	DNA-directed RNA polymerase II subunit RPB7	0	42.04	31.52	39.02	36.3	40.29	35.04	41.39	27.92	22.16	82.29	41.34	55.25	90.8	31	109.94	33.49	69.66	28.78	23.42	41.76	58.28	55.54	20.03	37.82	57.78	42.42	118.15	104.14	19.97	41.95	78.64	53.53	71.33	132.8	64.49	33.59	87.53	79.26	106.79	74.06	66.26	47.87	131.75	86.67	103.94	179.97	51.49
NM_006233	DNA-directed RNA polymerase II subunit RPB9	0	26.98	15.99	13.43	15.5	17.58	14.62	14.01	16.61	15.45	31.01	22.49	22.62	54.52	16.72	52	16.98	21.31	9.73	8.1	15.39	27.09	18.46	15.73	32.27	39.49	15.36	42.31	49.38	11.49	14.98	29.86	26.61	21.29	33.91	15.98	14.24	31.18	21.21	20.94	21.65	10.48	13.68	34.72	40.12	19.84	38.67	15.3
NM_032305	DNA-directed RNA polymerase III subunit	0	11.3	13	8.89	15.95	21.1	7.22	3.56	13.36	3.64	18.16	1.76	21.94	26.01	10.38	31.59	20.75	22.51	13.88	9.27	13.95	21.89	23.25	6.15	14.45	19.52	13.09	64.11	42.55	2.53	13.3	16.37	38.37	11.54	25.49	13.33	6.17	25.52	49.49	42.21	26.39	12.39	6.31	33.57	22.71	15.43	28.71	18.35
NM_007055	DNA-directed RNA polymerase III subunit RPC1	0	1.08	1.53	1.2	2.66	0.91	0.96	0.27	0.46	1.16	3.82	0.12	0.85	1.85	0.64	1.51	0.68	1.81	0.7	0.55	0.81	1.14	0.9	0.33	0.93	1.03	1.58	2.48	2.51	0.36	0.82	1.41	2.28	1	1.39	1.42	0.58	2.28	2.38	1.95	0.98	0.74	0.76	3.71	1.42	1.96	4.2	1.44
NM_016310	DNA-directed RNA polymerase III subunit RPC10	0	9.88	7.46	10.01	17.59	18.1	7.31	1.17	7.42	1.93	9.22	1.59	10.36	10.37	5.61	18.41	6.79	15.57	6.22	2.79	5.79	18.21	12.32	8.02	10.73	11.06	11.23	65.38	29.03	1.6	7.41	16.24	13.5	9.43	33.88	5.79	1.66	17.69	11.03	23.51	10.2	3.95	5.38	17.62	10	23.4	24.91	7.62
NM_018082,NM_001160708	DNA-directed RNA polymerase III subunit RPC2	0	0.65	0.84	0.47	0.88	0.28	0.34	0.05	0.49	0.52	2.07	0.02	0.72	1.11	0.28	1.78	0.21	1.05	0.31	0.28	0.23	0.81	0.98	0.29	0.21	0.56	0.72	1.43	0.33	0.09	0.33	0.98	0.66	1.18	2.33	0.83	0.72	1.7	0.98	1.83	0.88	0.55	0.34	1.71	0.94	1.05	1.33	0.79
NM_006468	DNA-directed RNA polymerase III subunit RPC3	0	12.7	5.34	5.36	9.98	4.25	4.56	5.07	2.57	4.69	30.88	8.57	6.59	19.62	3.5	14.36	6.74	8.19	3.95	3.09	4.6	5.86	6.08	2.29	6.46	5.19	6.28	25.37	13.52	2.01	4.34	9.6	13.42	10.04	14.92	10.39	6.52	12.48	12.81	12.65	8.22	7.44	4.81	18.5	14.04	9.96	24.2	8.01
NM_001722	DNA-directed RNA polymerase III subunit RPC4	0	1.13	4.88	4.26	5.11	4.39	3.56	0.57	3.13	2.02	3.48	1.25	2.29	0.65	2.89	6.01	2.52	6.09	1.88	1.19	3.41	6.75	3.73	1.69	3.96	4.78	5.3	33.61	5.76	1.43	1.3	3.81	5.15	2.33	6.16	1.36	3.28	6.53	4.44	7.69	1.12	1.24	0.53	8.25	2.07	4.93	7.89	3.17
NM_018119	DNA-directed RNA polymerase III subunit RPC5	0	18.43	3.43	3.18	6.29	4.72	2.29	0.43	2.64	7.11	10.86	1.75	2.23	5.28	1.36	5.83	2.5	5.36	2	1.58	2.67	2.92	1.89	1.05	2.59	4.68	4.66	2.93	5.04	0.34	4.62	3.22	2.63	4.12	7.47	7.83	7.29	5.38	13.67	7.06	3.92	2.96	2.94	10.5	5.95	4.27	6.78	4.96
NM_006466	DNA-directed RNA polymerase III subunit RPC6	0	3.78	1.75	0.57	0.57	1.88	0.52	1.78	1.61	3.04	13.66	1.56	5.17	11.01	1.19	5.8	0.68	2.97	1.18	0.65	0.83	3.1	3.2	0.34	1.21	2.15	0.86	3.42	2.84	0.65	2.33	2.55	4.28	2.22	11.45	7.78	4.65	5.2	13.06	5.32	7.35	3.86	2.72	3.76	4.53	2.52	4.28	2.08
NM_006467	DNA-directed RNA polymerase III subunit RPC7	0	0.1	0.16	0.03	0	0.06	0.01	0	0.42	0.4	0.38	0	0.44	0	0.02	0.41	0.12	0.43	0.11	0.05	0.13	0.33	0.09	0.03	0	0.08	0.15	0.43	0.09	0	0.12	0.23	0.07	0.29	2.08	0.24	1.04	0.49	1.52	0.96	0.55	0.17	0.13	0.66	0.29	0.51	0.37	0.35
NM_001018052,NM_138338,NM_001018050	DNA-directed RNA polymerase III subunit RPC8	0	13.44	6.32	6.76	11.1	5.27	6.38	2.89	3.97	6.47	17.87	3.82	5.08	10.46	5.09	16.12	5.76	10.01	4.32	4.33	5.79	8.15	5.39	4.7	10.08	12.5	10.04	22.14	14.05	2.98	5.78	11.33	6.88	8.24	12.41	5.98	4.45	14.28	11.7	11.17	9.15	5.26	6.29	21.04	12.55	8.63	21.76	8.5
NM_001040647,NM_001142414,NM_014478,NM_001040648	DNA-directed RNA polymerase III subunit RPC9	0	5.93	1.88	1.29	6.01	2.59	0.66	0.86	1.4	5.28	16.98	0.93	2.2	4.91	1.36	6.42	2.59	4.6	2.43	1.56	2.55	2.4	2.78	0.43	1.8	3.18	2.43	9.33	4.54	0.3	5.46	2.68	0.94	5.23	12.57	8.82	4.09	6.13	25.81	9.21	10.18	7.56	6.04	6.33	8.83	3.6	7.04	7.11
NM_005035	DNA-directed RNA polymerase, mitochondrial	0	0.51	1.25	1.22	2.68	1.54	0.93	0.57	0.79	1.61	1.97	0.49	1.04	3.15	0.9	2.22	1.24	2.06	1.19	0.53	1.78	1.63	1.22	1.17	2.56	3.11	2.91	6.91	4.54	0.75	1.72	1.92	1.36	1.11	1.21	0.92	0.92	2	1.59	1.45	1.06	0.49	0.62	2.45	2.1	0.65	2.75	1.76
NM_152705,NM_015972	DNA-directed RNA polymerases I and III subunit	0	164.76	12.56	18.49	29.7	46.95	17.62	37.4	20.89	57.26	165.06	101.29	33.6	189.18	16.44	52.67	63.38	29.95	17.51	20.81	25.66	29.87	30.37	10.93	49.37	37.89	39.86	75.17	55.92	14	19.74	32.21	49.02	105.74	85.07	65.96	83.67	68.72	58.47	67.08	50.89	24.05	23.53	111.91	138.88	27.16	109.93	28.46
NM_203290,NM_004875	DNA-directed RNA polymerases I and III subunit	0	8.17	5.52	5.02	6.96	7.42	5.63	4.05	2.32	9.1	24.92	1.93	4.42	18.7	2.35	12.91	2.5	7.83	2.42	2.09	3.68	6.29	3.93	1.6	3.46	7.05	5.52	26.53	8.03	1.04	3.9	7.71	9.8	6.67	16.05	11.76	11.15	10.37	16.3	10.23	9.8	7.34	8.58	9.84	9.96	9.34	17.65	7.66
NM_021128	DNA-directed RNA polymerases I, II, and III	0	86.32	55.23	67.46	104.91	126.63	73.73	99.63	59.18	23.08	85.21	106.18	79.12	123.56	80.72	179.1	69.7	72.7	40.87	31.45	75.47	126.2	67.07	83.61	189.98	247.81	87.47	219.02	132.45	80.84	53.19	144.7	112.44	50.61	50.9	50.25	34.4	80.74	78.15	99.02	61.59	30.78	55.86	106.34	115.2	38.9	95.72	80
NM_002695	DNA-directed RNA polymerases I, II, and III	0	44.64	17.41	32.27	51.79	30.39	23.02	13.74	13.33	15.58	33.65	20.19	16.09	43.69	16.92	51.77	27.77	30.18	17.98	16.16	29.31	23.79	26.98	22.24	57.08	69.2	37.37	120.31	109.16	15.53	30.28	39.47	33.12	41.69	22.65	25.66	28.67	51.99	46.04	53.3	40.32	18.74	23.93	39.69	47.39	20.15	59.91	38.88
NM_021974	DNA-directed RNA polymerases I, II, and III	0	13.27	9.42	11.91	11.74	14.19	10.09	3.11	8.3	4.51	11.61	3.77	12.48	25.08	7.37	25.28	11.08	12.46	6.2	6.46	9.39	16.08	11.79	9.9	17.67	22.83	15.69	50.4	43.03	4.82	9.3	20.66	25.67	20.93	27.98	8.25	6.75	22.13	24.29	26.46	17.56	8.28	8.36	15.2	17.21	12.73	23.83	11.7
NM_006232	DNA-directed RNA polymerases I, II, and III	0	7.25	12.7	9.4	6.34	15.21	7.46	3.43	24.28	8.96	25.62	5.79	34.08	34.52	11.44	43.07	14.29	25.1	9.38	5.73	15.07	31.96	16.28	11.22	14.16	25.66	19.37	79.41	30.67	3.07	9	20.94	23.9	13.84	73.77	11.88	12.92	26.41	23.53	30.64	20.9	11.21	8.07	30.34	23.71	28.15	32.25	12.94
NM_005034	DNA-directed RNA polymerases I, II, and III	0	17.44	9.14	2.72	3.19	12.04	2.22	4.94	20.63	12.6	49.02	4.32	28.42	17.68	7.01	32.2	5.57	16.18	8.18	3.75	6.41	23.29	19.06	2.99	2.14	8.66	4.87	41.35	10.16	1.36	9.48	11.15	21.7	12.94	89.54	31.88	24.33	25.84	75.05	31.37	41.82	17.08	9.18	24.88	22.39	15.97	16.51	12.19
NM_012311	DNA/RNA-binding protein KIN17	0	2.79	2.76	1.2	2.49	3.38	0.78	0.36	1.43	1.49	6.54	0.58	3	1.76	1.04	6.03	2.38	3.63	1.59	2.22	1.13	2.96	4.01	0.4	1.28	1.28	1.11	5.8	4.36	0.14	1.42	1.75	6.21	4.09	2.97	3.84	3.1	4.16	15.35	9.45	8.39	3.39	2.8	3.85	3.01	3.1	3.77	3.62
NM_001080449	DNA2-like helicase	0	0.22	0.43	0.15	0.03	0.28	0.04	0.02	0.39	0.22	0.59	0.04	0.39	0.28	0.12	0.68	0.05	0.78	0.1	0.07	0.37	0.41	0.5	0	0	0.02	0.18	0	0	0.01	0.48	0.22	0.31	0.07	1.24	0.75	0.44	0.98	1.62	1.68	0.75	0.29	0.21	1.76	0.78	0.87	0.23	0.37
NM_004125	DNAJC25-GNG10 protein	0	3.69	2.61	2.36	1.53	4.6	0.11	4.07	0.96	3.31	3.36	2.58	21.89	1.85	4.46	8.79	8.72	8.65	4.45	6.43	4.62	2.37	1.53	0.23	0.36	0.93	1.39	8.32	0.87	0.51	0.84	1.2	8.02	18.39	13.75	6.23	8.4	11.76	111.89	32.76	61.38	8.37	4.58	3.91	9.16	3.98	3.26	12.32
NM_001080849	DNL-type zinc finger protein	0	22.07	8.54	8.81	13.14	10.02	6.1	23.26	8.74	16.51	66.54	46.51	13.42	26.38	11.47	24.66	30.41	17.59	10.23	5.02	11.31	15.21	11.17	10.73	34.28	28.89	15.57	54.23	84.89	5.89	14.74	16.85	8.49	9.1	9.64	8.36	17.72	35.74	36.56	27.78	6.78	3.98	16.58	10.34	15.17	4.26	15.6	8.17
NM_206831,NM_001047434	DPH3 homolog isoform 1	0	3.23	3.34	2.42	3.02	4.16	1.47	1.41	2.69	3.26	7.68	1.77	4.2	3.89	2.05	15.51	5.6	5.22	2.21	2.25	3.6	4.96	5.26	0.58	2.82	3.6	1.92	15.27	4.47	0.69	1.37	4.28	8.79	7.35	15.85	6.85	9.85	7.01	33.2	24.72	18.52	5.53	2.96	6.05	8.22	5.13	5.11	9.99
NM_138812	DPY30 domain-containing protein 1	0	0	0	0	0	0	0	0	0	0	0	0	0	0	0	0	0	0	0	0	0	0	0	0	0	0	0	0	0	0	0	0	0	0	0	0	0	0	0	0	0	0	0	0	0	0	0	0
NM_032372	DPY30 domain-containing protein 2	0	0	0	0	0	0	0	0	0	0	0	0	0	0	0	0	0	0	0	0	0.02	0	0	0	0	0	0	0	0	0	0	0	0	0	0	0	0	0	0	0	0	0	0	0	0	0	0	0
NM_001144955,NM_020234	DTW domain-containing protein 1	0	0.67	0.44	0.21	0.68	0.52	0.43	0.15	0.58	0.25	1.49	0.27	1.57	1.48	0.5	3.93	0.58	2.16	0.76	0.62	0.58	1.79	1.39	0.05	0.45	0.61	0.23	3.62	2.4	0.26	0.31	1.74	0.68	1.86	3.89	0.64	0.5	3.31	2.31	4.34	2.28	0.94	0.55	1.66	1.26	1.27	1.19	1.06
NM_173666	DTW domain-containing protein 2	0	0	0.1	0	0.09	0.17	0.03	0.04	0.06	0.14	0.3	0.04	0.03	0.09	0.03	0.34	0	0.15	0.07	0.02	0.02	0.07	0.09	0.02	0	0.05	0	0.43	0	0	0	0.01	0.06	0.36	0.8	0.08	0.05	0.37	0.22	0.4	0.24	0.12	0.03	0.35	0.19	0.11	0.26	0.2
NM_001099286,NM_138419	DUF729 domain containing 1	0	0.7	1.29	0.55	0.25	0.9	0.59	0.31	2.37	1.33	2.43	0.21	2.52	0.74	0.47	2.24	0	2.4	0.5	0.47	0.82	2.49	1.6	0.66	0.1	0.5	0.7	6.33	0.79	0.02	1.65	1.58	1.32	0.5	8.61	2.96	13.45	2.28	3.68	3.78	3.34	0.87	1.06	2.73	1.26	7.15	1.36	0.64
NM_001389	Down syndrome cell adhesion molecule isoform	1	0	0	0	0	0	0	0	0	0	0.03	0	0	0	0	0.02	0	0	0	0	0	0	0	0	0	0	0	0	0	0	0	0	0	0	0	0	0	0	0	0	0	0.01	0	0	0	0	0	0
NM_020693	Down syndrome cell adhesion molecule-like	1	0	0.01	0	0	0	0	0	0	0	0.13	0.02	0.01	0.09	0	0	0	0.01	0	0	0.02	0	0	0	0	0	0	0	0	0	0	0.01	0	0	0	0.02	0	0	0	0	0	0	0.01	0	0	0	0	0.01
NM_006052	Down syndrome critical region protein 3	0	11.66	7.93	4.81	14.83	6.69	3.4	1.05	3.45	6.45	18.6	1.41	5.73	8.33	2.39	11.74	6.88	12.05	5.39	3.75	5.1	5.58	7.28	1.51	3.2	5.62	7.15	16.52	13.04	1.28	8.36	6.74	10.9	7.46	12.97	10.09	9.03	12.4	24.35	19.49	17.15	8.96	6.66	18.27	12.42	8.23	17.62	12.23
NM_005867	Down syndrome critical region protein 4	1	0	0	0	0	0	0	0	0	0	0	0	0	0	0	0	0	0	0	0	0	0	0	0	0	0	0	0	0	0	0	0	0	0	0	0	0	0	0	0	0	0	0	0	0	0	0	0
NM_002036,NM_001122951	Duffy antigen/chemokine receptor isoform b	0	18.81	0.36	0.6	3.06	3.88	0.99	2.57	0.1	3.75	11.78	16.59	1.74	21.84	0.13	2.06	12.36	0.48	0.56	2.51	1	1.13	0.97	0.18	9.75	0.37	4.11	0.21	5.17	0.9	0.15	0.27	2	24.19	0.58	1.4	2.24	5.56	0.63	3.67	1.79	1.24	1.26	9.06	26.3	0.97	10.44	1.7
NM_000450	E-selectin precursor	1	0	0	0	0	0	0	0.03	0	0	0.03	0	0.01	0	0	0	0	0	0	0	0	0.01	0	0	0	0	0.02	0	0	0	0.03	0	0	0	0	0.03	0.02	0.03	0	0	0	0	0.05	0	0	0	0	0
NM_015409	E1A-binding protein p400	0	3.95	1.16	0.91	3.27	1.07	0.73	0.29	0.29	1.21	3.72	0.35	1.02	1.48	0.52	1.8	0.56	1.56	0.73	0.54	1.1	0.79	1.01	0.37	1.07	1.32	2.29	4.04	2.12	0.2	1.01	1.2	0.81	0.97	2.04	1.55	0.91	1.8	1.68	2.57	0.64	0.78	1.02	5.13	2.26	1.48	3.83	2.38
NM_018453	E2F-associated phosphoprotein	0	21.85	10.96	7.81	11.57	9.27	4.73	5.02	9.08	21.35	78.31	4.02	27.62	42.02	8.18	38.89	18.75	22.43	11.95	8.64	7.74	14.96	18.41	3.46	10.04	14.82	9	30.7	21.81	1.58	13.69	19.55	24.22	21.76	56.82	43.64	28.23	30.09	143.02	39.19	48.26	20.7	24.1	30.27	37.2	13.01	32.91	25.65
NM_016323	E3 ISG15--protein ligase HERC5	0	3.66	7.68	10.71	62.09	9.31	2.42	0.52	1.45	5.43	12.96	0.45	13.37	6.76	1.2	10.82	9.26	9.87	2.84	18.3	3.37	2.97	2.85	0.95	1.83	2.79	4.67	60.07	198.17	0.48	2.75	5.44	148.22	13.48	8.98	3.78	5.15	44.52	167.02	50.86	24.23	4.51	13.5	6.41	13.94	5.67	25.08	32.47
NM_003655	E3 SUMO-protein ligase CBX4	0	27.7	5.35	4.65	18.09	9.13	4.07	2.05	9.12	13.77	18.43	2.19	7.9	15.64	3.31	16.42	8.25	15.18	10.22	7.61	6.48	6.54	9.5	2.46	9.3	16.36	10.3	35.21	38.93	0.51	9.61	8.48	3.93	9.14	16.76	3.81	37.75	11.8	68.64	15.29	12.18	4.42	7.35	14.66	18.76	2.75	9.7	15.53
NM_173685	E3 SUMO-protein ligase NSE2	0	3.61	4.4	2.31	2.28	7.98	1.28	1.63	10.34	6.36	14.99	1.62	8.79	11.38	3.05	13.98	6.11	8.04	4.2	3.48	2.34	11.34	10.32	2.85	6.02	5.95	5.98	13.56	7.09	0.7	2.87	7.27	13.46	5.2	26.7	8.71	5.15	6.35	27.52	16.09	12.61	3.89	2.81	12.36	7.41	8.65	8.31	8.12
NM_016166	E3 SUMO-protein ligase PIAS1	0	9.64	5.29	9.58	20.1	7.16	4.63	2.76	2.62	12.59	11.8	2.42	3.97	7.22	1.72	10.92	7.93	6.08	2.64	4.01	4	3.85	6.6	1.52	2.89	4.85	4.71	19.23	13.74	0.68	4.4	3.47	21.9	11.69	5.61	7.82	15.28	8.14	20.35	16.89	10.08	5.52	5.3	8.18	7.12	5.38	9.73	14.31
NM_004671,NM_173206	E3 SUMO-protein ligase PIAS2 isoform beta	0	2.26	1.01	0.22	0.84	0.52	0.42	0.46	1.08	2.06	5.6	0.48	1.61	1.39	0.49	2.13	0.37	1.22	0.91	0.36	1.78	1.03	1.47	0.25	0.66	1.17	0.52	0.96	0.07	0.1	1.01	0.94	0.7	0.65	3.39	2.37	1.01	1.62	1.74	1.92	1.97	1.41	0.75	3.57	1.49	1.1	1.82	1.78
NM_006099	E3 SUMO-protein ligase PIAS3	0	4.96	2.04	1.67	4.8	2.28	1.03	0.61	2.14	2.47	5.02	1.61	2.89	5.65	1.51	4.07	1.75	3.14	2.42	1.19	2.04	2.63	2.72	1.17	3.41	2.1	3.19	6.55	5.28	0.41	2.41	2.75	1.54	2.47	7.36	2.94	3.53	4.67	5.71	3.98	4.43	2.89	2.36	7.21	4.89	2.92	5.93	2.97
NM_015897	E3 SUMO-protein ligase PIAS4	0	8.67	6.91	7.7	15.56	6.39	5.81	1.76	1.96	5.1	12.99	3.01	3.41	6.11	3.52	9.77	3.94	7.59	3.68	3.79	5.11	4.82	4.11	4.13	5.6	9.73	11.2	17.65	18.12	1.7	5.67	5.44	6.14	5.16	3.17	4.42	4.68	7.32	17.66	12.04	8.14	3.25	6.5	11.62	10.77	6.51	11.12	6.62
NM_006267	E3 SUMO-protein ligase RanBP2	0	7.06	1.52	0.38	1.81	1.6	0.32	1.46	1.61	7.04	12.53	1.01	3.38	1.48	1.05	4.77	2.08	2.43	1.02	0.78	0.67	2.33	2.25	0.26	0.55	0.67	0.83	3.38	1.42	0.07	1.09	1.18	2.91	2.8	7.82	8.58	14.37	4.99	31.74	7.58	11.5	2.73	2.59	4.96	3.4	2.41	4.14	3.6
NM_015323	E3 UFM1-protein ligase 1	0	2.1	1.74	0.31	2	1.92	0.2	0.2	0.95	1.92	6.42	0.2	1.17	0.28	0.36	3.17	0.47	3	1.35	0.41	0.55	1.25	0.73	0.07	0.21	0.79	0.79	3.27	1.07	0.1	1.56	1.1	0.85	1.43	7.91	2.66	1.67	5.41	7.93	4.58	4.38	1.73	1.06	6	2.98	2.72	2.55	2.93
NM_002938,NM_001185010,NM_001185009	E3 ubiquitin ligase RNF4 isoform 1	0	8.91	4.46	4.04	10.04	4.05	2	0.59	1.62	6	21.27	0.96	1.63	2.5	1.45	6.4	2.12	7.76	2.54	2.7	1.92	3.15	3.58	1.04	2.64	3.04	3.87	16.81	7.28	0.45	5.3	4.22	1.69	4.37	7.55	9.05	6.17	8.67	10.78	9.65	5.77	3.6	4.93	13.51	8.61	7.22	10.07	7.74
NM_006321	E3 ubiquitin-protein ligase ARIH2	0	16.67	5.49	4.97	9.59	8.58	3.04	2.14	4.65	14.5	28.27	3.26	5.71	14.81	4.61	14.23	6.72	12.42	7.21	4.74	7.18	7.99	7.87	2.54	7.26	10.7	8.1	26.29	19.35	1.13	8.95	8.37	5.42	7.38	17.59	11.56	21.48	17.83	31.52	14.99	9.42	7.43	7.15	20.51	17.57	10.15	22.5	14.05
NM_017610	E3 ubiquitin-protein ligase Arkadia	0	2.43	1.5	1.34	4.65	2.51	0.73	0.41	0.88	4.38	4.9	0.22	3.05	2.13	0.62	4.25	1.82	2.57	1.47	1.16	2	1.45	2.9	0.16	0.92	1.35	0.87	5.95	2.51	0.23	1.62	0.83	4.1	2.65	6.08	3.5	8.41	4.64	12.56	9.41	6.77	2.41	1.84	4.91	4.59	2.07	4.11	6.51
NM_019592	E3 ubiquitin-protein ligase BRE1A	0	4.7	7.12	6.51	13.76	7.21	4.6	0.77	2.58	2.49	7.49	0.48	8.1	7.03	3.72	15.92	8.79	8.66	3.26	4.14	3.24	4.79	6.85	1.37	2.16	3.56	6.44	25.99	14.96	1.22	2.28	5.14	19.93	10.72	15.82	3.29	2.24	15.46	18.26	30.93	11.3	3.97	1.97	17.26	9.12	10.17	15.8	12.85
NM_014771	E3 ubiquitin-protein ligase BRE1B	0	36.74	14	24.48	64.48	17.48	14.46	5.2	4.58	10.76	30.85	9.15	7.43	18.51	7.96	22.41	24.07	17.57	9.38	12.23	21.95	10.22	10.04	9.17	23.78	33.57	27.83	58.21	78.54	4.98	13.94	16.75	14.88	24.91	11.09	13.73	8.91	27.33	36.46	38.03	24.88	15.45	17.05	40.38	29.02	19.31	37.36	35.71
NM_005188	E3 ubiquitin-protein ligase CBL	0	2.77	1.75	3.13	10	4.29	2.05	0.17	0.71	1.88	1.81	0.22	1.63	2.68	1.02	4.71	4.36	3.07	2.21	1.81	2.16	1.49	3.3	0.43	0.97	2.19	2.72	7.85	4.65	0.27	1.5	2.58	3.38	5.23	4.88	1.92	3.5	5.44	8.85	11.38	4.67	2.3	2.36	7.67	6.7	3.5	6.5	9.58
NM_170662	E3 ubiquitin-protein ligase CBL-B	0	8.84	4.09	2.89	2.81	3.7	1.42	1.36	2.31	15.97	16.09	1.25	6.51	7.77	0.94	2.44	0.91	5.36	2.32	0.77	2.61	1.99	2.18	1.41	1.8	2.02	4.62	8.62	2.88	0.23	5.22	2.86	2.32	1.15	9.41	8.81	10.52	4.78	9.29	3.08	5.13	2.8	2.65	16.11	6.41	8.43	8.37	3.53
NM_182852,NM_021178,NM_182849,NM_182851	E3 ubiquitin-protein ligase CCNB1IP1 isoform 4	0	5.28	2.92	2.1	1.6	3.88	2.69	1.99	3.27	11.72	18.43	2.59	6.09	15.83	1.55	6.44	2.05	5.7	2.68	1.22	3.46	4.28	3.84	1.15	3.54	4.65	2.24	13.91	7.07	0.49	5.53	6.01	3.27	3.98	13.85	11.16	16.11	7.65	5.29	5.76	4.14	2.21	2.38	6.9	5.4	5.73	8.28	3.69
NM_018223,NM_001161344,NM_001161346,NM_001161345,NM_001161347	E3 ubiquitin-protein ligase CHFR isoform 4	0	17.95	8.91	5.89	19.69	11.48	2.85	2.8	7.25	9.09	25.46	4.24	10.77	18.23	4.88	18.55	9.47	14.29	8.97	6.89	9.62	8.53	10.36	2.68	7.88	10.18	11.49	29.67	24.41	1.54	13.99	11.77	12.47	9.93	17.78	13.53	7.77	15.71	41.19	20.92	21.81	10.57	7.33	19.42	17.28	6.86	12.26	19.1
NM_005861	E3 ubiquitin-protein ligase CHIP	0	66.15	23.31	27.05	49.95	33.1	26.57	27.58	21.88	24.95	48.51	56.92	28.53	106.99	28.6	82.27	43.16	45.22	27.29	21.6	32.53	42.59	35.18	23.9	70.77	69.38	46.8	122.17	90.36	22.21	35.69	58.25	31.9	50.83	51.47	37.12	26.97	64.15	54.6	54.28	41.42	22.45	30.67	72.14	77	24.99	92.31	37.36
NM_138287	E3 ubiquitin-protein ligase DTX3L	0	6.19	11.12	18.24	41.55	21.14	8.54	1.12	4.54	5.34	12.39	1.23	14.8	8.79	6.05	37.75	23.86	18.02	5.57	10.48	5.49	11.07	15.08	2.57	4.27	7.42	11.29	82.19	73.3	1.33	3.97	12.43	66.78	25.27	28.48	6.08	6.46	41.11	56.53	80.34	23.91	6.09	6.5	18.6	19.61	19.13	33.02	47.68
NM_014648	E3 ubiquitin-protein ligase DZIP3	0	0.79	0.53	0.15	0.4	0.73	0.29	0.12	0.6	0.56	1.19	0.08	1.21	1.76	0.23	1.57	0.35	1.14	0.42	0.24	0.31	0.62	0.56	0.16	0.93	0.55	0.73	1.16	0.87	0.06	0.32	0.47	0.51	0.75	1.53	0.65	0.77	1.58	1.4	1.63	0.81	0.49	0.22	3.99	1.68	1.24	1.56	1.01
NM_018062,NM_001114636	E3 ubiquitin-protein ligase FANCL isoform 2	0	1.64	2.45	0.84	1.85	1.98	1.06	0.77	3.3	4.25	6.69	1.29	5.88	3.05	1.76	9.53	1.98	6.23	2.7	1.39	1.99	4.49	4.24	0.28	0.4	1.36	0.73	9.99	3.45	0.52	1.49	2.57	6.84	4.84	15.87	3.69	5.68	12	16.11	16.14	11.26	4.63	1.82	9.71	8.8	3.99	6.89	3.75
NM_020771	E3 ubiquitin-protein ligase HACE1	0	0.82	0.25	0.04	0.19	0.13	0.01	0.06	0.28	0.51	0.84	0.08	0.2	0.28	0.02	0.21	0	0.28	0.19	0.05	0.18	0.23	0.27	0.03	0.07	0.08	0.14	0.49	0.24	0.04	0.44	0.12	0.06	0.57	1.14	0.69	0.51	0.86	2.54	0.85	1.09	0.4	0.15	0.97	0.78	0.39	0.31	0.56
NM_015382	E3 ubiquitin-protein ligase HECTD1	0	6.41	1.68	0.56	3.25	2.07	0.43	0.53	1.49	4	14.29	0.9	2.39	3.42	0.77	4.86	1.35	2.71	1.11	0.65	1.48	1.85	2.07	0.18	0.57	1.04	1	4.47	0.94	0.1	1.75	1.26	2.54	2.22	4.71	3.27	3.41	3.38	7.7	5.16	3.22	1.9	1.58	6.64	3.62	2.36	3.09	3.68
NM_024602	E3 ubiquitin-protein ligase HECTD3	0	20.38	7.64	8.86	19.91	9.6	7.7	3.39	2.99	4.08	18.19	6.59	3.81	20.73	5.07	12.49	11.64	9.97	5.18	4.78	6.98	7.44	6.61	4.91	12.83	12.89	14.27	24.73	22.07	4.28	7.64	9.48	8.81	14.02	10.64	7	2.33	14.2	11.86	16.74	9.36	7.15	8.6	25.23	13.91	12.65	27.63	8.2
NM_015052	E3 ubiquitin-protein ligase HECW1	1	0	0	0	0	0	0	0	0	0	0	0	0	0	0	0	0	0.01	0	0	0	0	0	0	0	0	0	0	0	0	0	0	0	0	0.03	0	0	0	0	0	0	0	0.01	0	0	0	0	0
NM_020760	E3 ubiquitin-protein ligase HECW2	0	0.1	0.03	0.09	0.4	0.11	0.06	0	0.1	0.08	0.1	0	0.07	0.19	0.06	1.42	0.09	0.09	0.04	0.15	0.12	0.06	0.15	0	0.07	0.07	0.02	0.28	0.92	0.02	0.06	0.23	0.48	0.43	0.21	0.04	0.11	0.34	0.98	1.36	0.48	0.29	0.04	0.07	0.36	0.06	0.06	0.68
NM_004667	E3 ubiquitin-protein ligase HERC2	0	1.69	0.7	0.47	1.6	1.14	0.43	0.06	0.22	0.17	1.19	0.16	0.42	1.11	0.24	1.09	0.44	1.09	0.39	0.23	0.74	0.73	0.54	0.27	0.29	0.72	1.05	2.63	1.37	0.05	0.64	0.57	0.37	0.29	1.39	0.63	0.43	1.3	1.93	1.18	0.54	0.37	0.53	3.45	1.59	0.83	1.56	1.85
NM_031407	E3 ubiquitin-protein ligase HUWE1	0	13.44	3.68	3.87	10.76	2.44	2.51	1.12	1.24	3.63	10.11	1.35	2.78	6.2	1.44	4.45	2.64	3.56	1.57	1.78	2.28	2.44	2.09	1.57	3.09	2.74	6.96	10.27	6.52	0.69	2.29	3.12	5	4.87	5.1	3.65	5	6.11	6.37	5.95	3.19	2.04	2.66	15.58	5.05	6.51	13.16	5.63
NM_024814	E3 ubiquitin-protein ligase Hakai	0	7.64	1.65	1.5	5.68	2.93	0.8	0.59	0.78	3.68	11.88	0.62	1.68	1.67	0.52	3.11	1.52	3.21	1.47	1.44	0.81	1.83	1.62	0.22	0.73	2.07	2.27	6.5	5.21	0.2	2.99	2.16	2.45	3.08	7.52	5.45	6.32	6.65	16.74	7.28	5.95	2.93	4.22	5.98	5.14	3.8	6.27	5.05
NM_031483	E3 ubiquitin-protein ligase Itchy homolog	0	6.34	3.16	1.69	4.83	4.16	1.11	1.04	3.07	8.56	14.5	0.7	6.57	4.72	1.56	11.65	4.92	6.36	3.19	2.04	1.97	4.22	4.25	0.46	1	2.38	2.45	10.82	3.77	0.34	3.92	3.36	7.34	6.42	22.85	8.1	9.39	13.12	28.85	15.89	14.57	6.12	4.63	11.95	10.64	5.96	9.25	12.03
NM_020122	E3 ubiquitin-protein ligase KCMF1	0	17.35	3.58	4.09	5.64	5.87	3.4	2.57	4.56	13.54	19.48	7.53	8.15	11.01	2.68	11.14	8.39	6.52	3.48	2.93	4.41	5.04	6.28	1.04	3.47	4.48	3.31	12.94	8.68	1.14	5.69	5.67	7.98	10.43	14.86	13.78	22.62	9.17	30.88	16.47	16.88	7.39	6.9	12.59	12.36	6.47	11.35	10.03
NM_001126328,NM_032622	E3 ubiquitin-protein ligase LNX isoform a	0	0.19	0.13	0.05	0.07	0.07	0	0	0.08	0.17	1.37	0.06	0.17	0	0.11	0.66	0.3	0.25	0.12	0.05	0.05	0.07	0.15	0	0	0	0.02	0.41	0	0	0.04	0.07	0	0.18	0.78	0.59	0.39	0.37	1.17	0.52	0.61	0.2	0.1	0.79	0.58	0.18	0.34	0.35
NM_001005373,NM_001190723,NM_138361,NM_001005374	E3 ubiquitin-protein ligase LRSAM1 isoform 1	0	5.66	5.54	5.64	10.24	3.94	4.83	2.47	1.52	2.83	2.8	3.06	4.7	14.25	3.2	7.99	5.55	4.73	2.97	4.46	6.87	5.13	7.26	3.79	5.89	10.46	7.89	16.02	18.19	3.4	4.34	6.15	10.9	7.17	4.17	3.5	3.94	6.96	9.64	9.86	5.29	2.81	3.3	10.39	8.77	2.95	10.13	6.89
NM_017923,NM_001166373	E3 ubiquitin-protein ligase MARCH1 isoform 2	0	4.05	1.34	0.96	8.57	4.61	0.78	0.41	1.72	4.27	3.42	0.2	2.1	3.79	1.66	14.27	3.38	3.95	2.64	1.66	1.49	4.04	5.98	0.12	0.73	0.81	1.46	7.15	5.71	0.49	2.91	3.43	2.19	7.24	11.25	3.63	10.15	10.42	17.69	20.29	13.94	6.7	4.18	8.74	6.34	4.02	6.52	8.22
NM_001102562	E3 ubiquitin-protein ligase MARCH11	1	0	0	0	0	0	0	0	0	0	0	0	0	0	0	0	0	0	0	0	0	0	0	0	0	0	0	0	0	0	0	0	0	0	0	0	0	0	0	0	0	0	0	0	0	0	0	0
NM_001005416,NM_001005415,NM_016496	E3 ubiquitin-protein ligase MARCH2 isoform 2	0	197.06	17.57	35.48	60.1	104.46	14.62	34.4	16.47	54.45	99.04	133.55	48.13	393.27	32.7	186.7	153.84	60.31	36.14	30.89	49.59	49.73	60.92	21.45	152.78	51.27	85.6	99.45	152.32	40.55	50.44	74.89	57.66	128.68	48.44	58.79	56.12	119.55	101.01	60.85	69.48	41.83	42.61	106.28	207.6	25.85	148.4	52.48
NM_178450	E3 ubiquitin-protein ligase MARCH3	0	1.59	0.5	1.41	0.75	1.22	0.44	0.39	0.18	0.96	7.65	1.33	0.39	4.91	0.19	0.87	0.84	0.66	0.32	0.3	1.02	0.48	0.8	0.24	0.71	0.57	0.86	2.89	2.01	0.02	0.39	0.46	2	1.43	0.96	1.46	2.27	1.13	4.34	1.3	0.81	0.35	0.55	1.69	1.2	0.43	1.5	2.26
NM_020814	E3 ubiquitin-protein ligase MARCH4 precursor	1	0	0	0.01	0	0.04	0	0	0	0	0	0	0	0	0	0.02	0	0	0	0	0.02	0	0	0.01	0.09	0	0	0	0	0	0	0	0	0	0	0	0	0	0	0	0	0	0	0	0.06	0.01	0	0
NM_017824	E3 ubiquitin-protein ligase MARCH5	0	7.03	2.89	1.7	4.45	1.95	0.91	1.24	2.67	5.34	11.7	1.33	4.66	2.68	1.13	7.47	3.36	4.45	2.04	2.18	2.37	2.77	3.52	0.36	1.64	1.61	1.63	8.88	5.58	0.24	2.98	2.38	4.1	5.48	12.33	9.08	15.71	8.35	37.22	16.49	14.78	5.6	4.08	7.31	6.34	3.96	5.5	7.9
NM_005885	E3 ubiquitin-protein ligase MARCH6	0	34.18	3.65	2.43	4.98	5.94	2.26	4.44	4.51	18.59	38.03	12	11.15	24.16	2.1	12.83	12.52	5.62	3.59	3.09	5.48	4.04	7.5	0.98	2.75	4.59	4.88	9.22	6.54	0.4	6.61	2.72	11.18	10.39	15.61	14.67	19.66	9.63	37.86	11.58	22.75	10.87	9.14	17.06	16.01	3.97	10.33	11.73
NM_022826	E3 ubiquitin-protein ligase MARCH7	0	11.56	6.34	1.99	7.79	7.37	1.3	2.76	6.1	18.51	40.96	2.12	14.97	6.66	3.55	24.55	9.58	16.99	9.23	7.4	4.26	7.83	12.87	0.56	0.74	3.9	3	9.65	8.07	0.82	7.6	8.4	30.91	27.78	51.47	26.91	41.66	37.4	130.85	58.52	51.57	16.04	12.16	27.02	26.63	12.03	25.22	39.29
NM_001002265,NM_145021,NM_001002266	E3 ubiquitin-protein ligase MARCH8 isoform 6	0	126.62	2.9	3.31	16.54	17.82	1.39	0.55	0.57	6.77	42.03	3.35	2.31	24.71	0.53	7.97	14.92	4.47	3.39	3.78	3.31	1.21	1.79	0.44	7.38	3.7	8.71	14.78	15.09	0.09	2.09	1.66	4.21	22.08	3.96	2.21	2.9	12.43	16.84	11.22	5.83	2.51	2.33	38.83	27.56	1.81	11.74	17.37
NM_138396	E3 ubiquitin-protein ligase MARCH9	0	2.05	3.48	2.23	6.65	4.91	2.2	1.06	1.62	12.91	5.71	2.31	3.26	12.87	2.14	4.66	1.98	6.05	4.38	2	3.62	4.63	3.3	1.64	8.25	6.95	4.95	21.54	7.5	0.88	1.75	5.72	1.54	2.44	3.13	3.58	13.37	5.96	2.92	3.02	1.64	1.09	1.26	5.9	4.85	2.47	10.84	5.61
NM_001142291,NM_015246,NM_001142289,NM_001142290	E3 ubiquitin-protein ligase MGRN1 isoform 4	0	19.08	6.62	7.06	21.11	7.22	3.88	1.05	1.36	5.26	11.54	2.09	3.32	9.72	2.86	9.84	8.21	6.9	4.9	6.33	7.31	4.03	6.92	2.78	8.88	10.08	9.49	25.5	20.63	1.16	8.63	6.71	3.99	6.99	3.22	3.44	3.15	6.27	21.27	9.63	7.04	4.44	7.39	10.48	12.62	2.88	11.21	17.25
NM_020774	E3 ubiquitin-protein ligase MIB1	0	0.84	0.2	0.06	0.51	0.56	0.08	0.06	0.37	1.02	1.73	0.14	0.51	1.02	0.19	1.12	0.28	0.69	0.61	0.2	0.27	0.28	0.39	0.02	0.05	0.29	0.2	0.15	0.59	0.05	0.35	0.37	0.39	1.43	3.13	0.53	1.63	3.12	3.71	2.73	1.73	0.94	0.4	2.04	2.17	0.73	1.33	2.26
NM_001170688,NM_001170686,NM_080875,NM_001170687,NM_001170689	E3 ubiquitin-protein ligase MIB2 isoform 4	0	11.08	6.44	5.54	18.09	10.63	5.23	8.26	3.23	6.71	13.72	18.64	6.9	23.32	9.13	19.37	11.68	13.68	7.37	5.62	15.62	9.41	8.23	7.96	25.12	25.6	14.79	40.9	31.3	6.03	8.59	10.76	6.95	1.54	1.29	4.09	6	8.42	8.5	5.57	3.7	1.56	2.77	17.03	15.33	0.77	9.96	9.51
NM_013262	E3 ubiquitin-protein ligase MYLIP	0	25.01	2.85	7.14	17.3	8.07	1.89	4.6	5.99	18.15	49.61	17.27	8.76	13.98	2.64	14.57	8.65	8.08	5.9	4.18	22.59	2.23	5.14	0.59	9.61	21.71	3.33	24.94	17.99	0.44	3.98	4.4	9.63	13.44	29.85	6.4	82.53	26.32	70.64	38.39	32.96	17.7	8.81	10.06	31.87	5.12	13.84	22.63
NM_002392	E3 ubiquitin-protein ligase Mdm2 isoform MDM2	0	6	1.75	0.97	3.21	1.75	0.71	0.78	2.6	3.96	7.81	0.76	3.21	1.02	1.08	6.39	1.75	2.9	1.57	0.79	1.47	4.06	2.66	0.25	0.21	1.39	0.99	3.55	2.44	0.22	2.23	1.93	2.22	5.74	21.11	7.05	8.36	6.71	24.54	10.75	11.53	3.47	2.52	5.93	6.6	3.99	3.74	6.88
NM_006154,NM_198400	E3 ubiquitin-protein ligase NEDD4 isoform 1	0	0.53	0.63	0.08	0.39	0.08	0.1	0.03	0.27	0.12	0.94	0.02	0.71	0.93	0.08	1.35	0.44	0.39	0.26	0.16	0.05	0.31	0.74	0.03	0.1	0.13	0.26	0.21	0.41	0.02	0.07	0.33	1.49	0.22	0.74	0.21	0.34	0.66	11.26	1.03	1.94	0.28	0.1	0.67	0.91	0.36	0.2	0.67
NM_015277,NM_001144967,NM_001144964,NM_001144968,NM_001144965,NM_001144971,NM_001144969,NM_001144970,NM_001144966	E3 ubiquitin-protein ligase NEDD4-like isoform	0	9.8	0.23	0.31	0.38	0.74	0.31	0.59	0.15	1.11	4.53	2.5	0.53	3.98	0.13	1.53	1.63	0.27	0.12	0.35	0.62	0.33	0.23	0.02	0.36	0.15	1.52	1.22	0.65	0.1	0.11	0.37	0.31	1.4	0.95	0.44	1.85	1.52	1.36	1	1.1	0.46	0.42	3.27	2.14	0.34	1.33	0.52
NM_001142651	E3 ubiquitin-protein ligase NEURL1B	1	0.05	0.02	0	0	0.03	0.04	0.02	0	0.04	0.02	0	0.07	0	0.01	0.07	0	0.12	0.05	0.01	0.02	0.04	0.04	0.03	0	0.08	0.07	0.13	0	0.01	0	0.02	0	0	0.03	0	0	0.1	0.03	0.02	0.13	0.01	0	0.05	0.06	0.03	0.09	0.01
NM_198586	E3 ubiquitin-protein ligase NHLRC1	0	0.14	0.24	0.06	0.36	0.18	0.17	0	0.07	0	0.17	0	0.14	0.28	0.12	1.3	0.42	0.39	0.03	0.07	0.28	0.31	0.33	0.04	0	0.07	0.19	0	0.22	0.15	0.39	0.46	0.11	0.29	0.35	0.06	0	0.49	0.25	0.76	0.58	0.24	0.12	0.79	0.58	0.24	0.28	0.16
NM_194359,NM_005785,NM_194358	E3 ubiquitin-protein ligase NRDP1 isoform 1	0	9.01	7.63	7.6	14.1	7.85	4.69	1.77	3.24	10.17	31.05	1.83	5.48	8.14	4.45	20.9	9.42	9.17	4.79	4.72	6	9.53	10.76	2.07	5.7	8.92	7.54	24.6	21.22	1.91	3.99	11.65	14.07	12.62	15.97	7.75	9.25	10.87	22.54	22.61	9.24	7.11	3.45	11.6	10.74	7	17.5	16.8
NM_015009	E3 ubiquitin-protein ligase PDZRN3	1	0	0	0	0	0	0	0	0	0	0	0	0	0	0	0	0	0	0	0	0	0	0	0	0	0	0	0	0	0	0	0	0	0	0	0	0	0	0	0	0	0	0	0	0	0	0	0
NM_001032396,NM_145119,NM_022368	E3 ubiquitin-protein ligase Praja-1 isoform b	0	2.29	3.1	2.37	4.22	1.96	1.61	0.38	0.89	2.98	4.28	0.68	1.32	2.04	1.09	3.18	1.26	4.64	1.56	0.91	1.44	1.81	1.21	0.97	1.87	2.65	3.64	8.13	6.19	0.24	1.85	3.8	0.99	1.47	6.55	2.82	5.19	6.84	4.6	4.58	2.18	1.39	1.28	8.17	4.24	4.39	7.06	3.73
NM_014819	E3 ubiquitin-protein ligase Praja-2	0	11.59	7.3	2.79	12.52	6.49	1.58	1.41	6.54	19.99	29.26	1.52	16.45	2.87	3.33	22.5	11.78	10.93	6.26	6.3	2.67	7.27	9.17	0.5	1.92	3.2	4	16.13	9.18	0.61	5.4	6.98	29.59	21.15	53.79	19.3	55.7	27.92	195.05	53.12	50.5	13.93	10.77	17.95	24.46	10.65	14.55	32.86
NM_020165	E3 ubiquitin-protein ligase RAD18	0	1.3	0.47	0.21	0.37	0.53	0.17	0.31	0.84	0.79	2.86	0.16	0.85	1.02	0.2	0.98	0.51	1.49	0.54	0.23	0.26	0.62	0.65	0.19	0.45	0.34	0.41	0.9	0.41	0.05	0.53	0.69	1.36	0.68	3.34	1.24	0.71	1.73	1.55	1.65	0.98	0.43	0.68	2.45	1.23	1.61	2.16	1.19
NM_018703,NM_006910,NM_032626	E3 ubiquitin-protein ligase RBBP6 isoform 2	0	11.56	1.87	1.19	4.03	3.63	0.79	2.35	3.36	7.35	13.6	2.88	5.59	8.33	1.35	7.06	3.26	5.41	2.63	1.68	5.2	2.81	2.93	0.66	4.34	4.45	2.29	11.42	6.87	0.38	4.22	1.53	5.81	2.69	6.06	5.09	11.78	7.35	24.16	10.1	8.6	3.25	3.86	8.02	7.28	2.53	4.6	7.18
NM_014248	E3 ubiquitin-protein ligase RBX1	0	85.09	19.87	16.46	20.63	69.15	12.17	13.16	51.66	59.12	91.92	30.89	80.33	188.44	32.24	120.17	49.39	53.96	31.42	23.42	17.69	74.77	75.04	16.48	40.03	32.28	32.93	134.39	128.27	8.69	21.64	59.62	106.5	94.13	255.29	63.08	80.7	92.26	121.15	86.19	64.8	33.44	29.21	113.49	91.98	67.46	100.82	39.26
NM_022457,NM_001001740	E3 ubiquitin-protein ligase RFWD2 isoform a	0	4.63	5.74	7.37	9.45	14.38	3.4	1.02	3.06	3.87	7.27	1.35	12.76	13.51	4.04	26.93	16.79	10.26	4.83	7.59	5.4	8.57	14.13	1.26	1.69	5.21	4.43	29.63	12.56	1.45	3.82	8.88	35.98	17.49	17.23	4.92	4.25	14.2	37.57	41.25	19.26	7.19	5.21	8.97	13.75	8.15	16.74	25.08
NM_018124	E3 ubiquitin-protein ligase RFWD3	0	4.24	1.47	1.21	2.88	1.39	0.98	0.42	1.12	1.96	8.97	0.34	1.19	2.04	0.55	2.22	1.38	3.12	1.13	0.78	1.29	1.17	1.79	0.39	1.3	1.21	1.55	3.36	1.53	0.13	2.93	1.75	2.06	2.29	5.48	2.31	2.09	2.77	7.01	4.11	2.43	1.73	1.75	6.29	2.98	4.15	3.15	3.52
NM_002931	E3 ubiquitin-protein ligase RING1	0	1.45	0.8	0.58	1.97	1.63	0.52	0.16	0.19	0.61	1.14	0.32	0.5	0.74	0.4	1.67	0	0.86	0.66	0.15	0.8	1.2	0.81	0.41	1.9	1.97	1.62	7.25	4.6	0.13	0.81	1.32	0	0.36	1.11	0.77	1.82	2.01	1.27	1.45	1.7	0.97	0.76	1.68	1.16	0.9	2.84	1.31
NM_007212	E3 ubiquitin-protein ligase RING2	0	2.12	1.03	0.47	1.34	1.02	0.31	0.27	0.86	1.25	6.34	0.32	1.08	0.19	0.2	2.79	1.12	1.37	0.63	0.55	0.85	0.96	1.05	0	0	0.37	0.31	5.26	1.05	0.21	0.74	1.25	3.46	2.01	5.31	2.86	5.06	3.25	13.28	3.75	4.35	1.46	1.08	2.84	1.68	1.28	2.01	1.73
NM_183353,NM_016120	E3 ubiquitin-protein ligase RLIM	0	4.72	1.19	1.03	2.16	1.77	0.51	0.41	0.83	3.05	9.32	0.37	2.06	2.13	0.44	3.5	2.15	1.77	0.74	0.76	0.51	1.33	1.79	0.17	0.28	0.54	0.79	5.37	1.59	0.16	1.29	1.27	7.5	3.08	3.12	3.42	4.71	3.26	30.28	7.2	8.83	2.32	2.08	2.45	3.3	1.41	2.33	5.03
NM_005667	E3 ubiquitin-protein ligase RNF103	0	7.2	2.06	0.44	3.59	2.61	0.9	1.15	1.13	6.47	11.85	1.23	2.38	5.09	0.63	4.84	1.31	2.04	0.96	0.91	2.08	1.91	2.39	0.17	0.29	1.12	0.83	2.57	0.63	0.12	1.74	1.41	4.28	4.23	6.11	4.93	10.98	3.49	16.58	5.14	5.07	2.45	3.53	4.09	3.88	1.52	3.12	4.84
NM_014455	E3 ubiquitin-protein ligase RNF115	0	13.85	4.1	2.48	6.02	3.38	1.95	1.42	3.48	7.78	19.64	1	4.61	7.5	1.43	9.61	3.33	7.02	2.32	1.95	3.42	4.3	2.89	0.53	2.9	3.12	3.91	14.57	5.15	0.51	4.46	3.69	9.89	6.45	15.52	8.88	7.77	8.02	16.99	11.87	8.92	3.69	2.78	12.6	9.54	5.95	8.45	5.37
NM_022064	E3 ubiquitin-protein ligase RNF123	0	50.16	3.05	3.12	8.92	10.42	2.21	0.51	0.73	5.56	18.91	3.69	0.7	24.16	1.33	5.6	15.27	3.87	2.56	4.84	4.01	1.92	2.22	1.47	9.84	5.26	8.1	13.97	8.64	0.59	2.56	3.16	2.28	10	2.17	1.77	1.67	7.97	8.62	8.18	4.73	3.46	2.96	37.03	27.63	2.45	12.54	8.76
NM_017831	E3 ubiquitin-protein ligase RNF125	0	7.35	0.65	0.63	1.65	1.33	0.29	0.35	0.94	4.19	19.1	0.46	1.71	4.17	0.39	2.62	0.65	3.08	1.36	0.3	0.68	0.95	0.92	0.33	0.38	1.12	0.74	3.64	1.22	0.07	2.73	1.21	0.85	1.72	12.81	16.27	5.43	5.35	16.96	4.24	6.58	3	2.88	11.96	4.66	3.62	5.5	4.82
NM_024539,NM_194463	E3 ubiquitin-protein ligase RNF128 isoform 2	1	0	0	0	0	0	0	0	0	0	0	0	0	0	0	0	0	0	0	0	0	0	0	0	0	0	0	0	0	0	0	0	0	0	0	0	0	0	0	0	0	0	0	0	0	0	0	0
NM_007282,NM_183381	E3 ubiquitin-protein ligase RNF13	0	5.08	5.1	3.13	12.62	6.8	0.99	0.12	2.83	6.19	8.06	0.32	5.71	2.68	0.95	12.24	3.4	5.88	3.69	4.19	2.1	2.55	5.91	0.43	0.47	2.49	2.72	21.48	16.36	0.22	3.67	3.84	6.55	5.05	8.78	3.61	6.09	8.38	66.2	24.42	24.26	7.44	4.25	7.48	14.33	3.01	4.91	18.71
NM_018434	E3 ubiquitin-protein ligase RNF130 precursor	0	65.14	30.34	72.05	116.17	71.34	62.51	13.07	27.03	42.09	34.17	12.88	42.46	96.72	35.67	187.64	117.32	58.92	50.27	59.86	55.13	40.91	85.86	8.43	43.4	61.61	34.25	155.42	161.13	13.14	41.69	71.82	164.42	160.08	109.23	51.47	60.93	103.71	261.32	224	134.3	77.81	79.57	57.24	136.17	43.15	156.59	175
NM_139175	E3 ubiquitin-protein ligase RNF133	1	0	0	0	0	0	0	0	0	0	0	0	0	0.46	0	0	0	0	0.02	0	0	0	0	0	0	0	0	0	0	0	0	0	0	0	0	0	0	0	0	0	0	0	0	0	0	0	0	0
NM_001184992,NM_032322,NM_197939	E3 ubiquitin-protein ligase RNF135 isoform 3	0	7.06	6.66	7.17	32	10.35	6.85	2.9	4.4	2.67	8.41	2.15	7.32	18.42	7.54	36.24	12.59	12.87	8.25	4.79	9.35	8.88	16.08	2.64	7.12	11.51	10.41	25.22	49.75	3.86	12.54	21.94	12.58	22.51	23.75	8.97	5.7	19.85	24.1	23.19	19.01	16.74	11.79	15.28	12.13	10.16	25.82	9.39
NM_016271,NM_198128,NM_001191324	E3 ubiquitin-protein ligase RNF138 isoform 1	0	5.01	0.91	0.4	2.32	1.64	0.06	0.97	1.83	8.68	13.74	1.49	4.28	1.11	0.43	4.59	1.12	3.55	1.75	1.05	2.13	0.79	0.76	0.14	2.63	1.35	0.99	5.37	3.38	0.17	3.22	0.72	1.93	5.45	18.75	16.48	33.72	12.25	97.84	19.24	24.14	8.41	6.77	7.07	9.64	3.79	3.69	11.47
NM_007218	E3 ubiquitin-protein ligase RNF139	0	15.71	2.95	0.98	3.44	3.71	0.87	2.23	6.98	10.16	34.39	3.07	9.15	16.75	2.07	14.48	6.76	7	5.02	2.78	4.43	5.12	6.48	0.42	3.77	4.45	1.95	7.96	6.89	0.32	4.87	6.12	3.71	6.42	27.53	17.54	28.72	9.9	68.96	21.54	31.68	12.6	9.84	14.54	21.32	5.61	6.89	12.94
NM_183399,NM_004290,NM_183400,NM_183398,NM_183401	E3 ubiquitin-protein ligase RNF14 isoform 1	0	6.65	1.1	0.65	2.06	2.13	0.5	0.66	1.09	1.19	7.28	1.26	1.95	7.4	0.79	4.2	2.26	3.48	1.18	0.74	0.79	1.72	1.68	0.2	1	1.5	1.24	4.19	1.05	0.25	0.84	1.92	1.97	4.12	6.3	2.96	1.49	3.89	3.2	5.5	3.53	2.08	0.97	8.15	4.98	2.48	3.83	2.33
NM_182757	E3 ubiquitin-protein ligase RNF144B	0	59.82	4.96	4.73	8.13	9.13	2.8	4.44	9.38	25.21	25.15	7.78	12.04	7.03	4.07	18.95	14.22	3.83	5.13	4.16	5.06	4.95	12.55	1.18	2.21	4.29	6.04	10.93	13.74	0.63	8.8	5.84	37.97	23.41	33.2	16	64.03	8.94	277.77	32.25	109.84	31.78	18.48	14.72	13.3	4.7	11.12	45.03
NM_173647	E3 ubiquitin-protein ligase RNF149 precursor	0	26.5	46.37	57.13	82.24	59.12	22.51	2.69	26.87	13.16	18.83	2.01	93.97	22.4	17.12	138.38	100.79	58.47	26.76	51.89	26.07	30.76	63.46	6.65	12.74	28.84	39.18	157.75	116.18	5.24	26.4	42.68	246.22	166.68	148.45	33.73	39.85	148.51	828.31	331.64	347.76	77.57	59.32	53.85	146.2	41.57	138.61	206.54
NM_015528	E3 ubiquitin-protein ligase RNF167 precursor	0	47.22	43.92	104.82	117.22	89.75	64.45	17.83	31.58	21.44	46.33	23.02	62.92	76.91	35.39	114.69	112.96	92.43	37.16	47.14	60.81	58.91	79.68	49.07	104.56	149.87	90.62	296.69	253.11	25.92	46.84	89.82	201.01	193.85	119.73	49.54	36.95	143.1	252.03	178.99	124.57	56.81	42.29	92.79	117.14	100.83	197.22	113.16
NM_152617	E3 ubiquitin-protein ligase RNF168	0	4.94	1.03	0.56	2.55	0.98	0.31	0.78	0.88	2.49	8.6	0.7	2.56	1.57	0.64	3.38	1	1.96	1.14	0.42	1.11	1.06	0.93	0.25	0.55	1.05	0.68	2.97	1.2	0.17	2.05	0.95	1.32	2.69	10.84	6.04	3.92	4.5	12.14	4.85	7.14	2.7	2.18	4.24	3.91	2.62	4.45	2.77
NM_178532,NM_001113561	E3 ubiquitin-protein ligase RNF180 isoform 2	1	0	0	0	0	0	0	0	0	0	0	0	0.01	0	0.01	0	0	0	0	0	0	0	0	0	0	0	0	0	0	0	0	0	0	0	0	0	0	0	0	0	0	0	0	0	0	0	0	0
NM_016494	E3 ubiquitin-protein ligase RNF181	0	45.07	56.4	69.17	66.27	84.98	66.07	31.57	29.24	41.31	54.59	50.41	105.02	125.23	44.89	171.2	75.86	50.45	26.28	46.2	48.01	95.89	93.48	51.47	80.46	120.49	84.55	336.16	245.74	52.05	35.82	115.53	385.16	161.34	197.8	74.28	44.07	115.43	199.9	145.25	101.47	55.12	45.07	79.38	99.32	79.08	170.3	66.31
NM_001165034,NM_001165032,NM_152737,NM_001165033	E3 ubiquitin-protein ligase RNF182	0	15.68	0.07	0.02	0.6	1.09	0.12	0.01	0.1	1.7	6.73	0.08	0.56	6.02	0	0.09	4.5	0.39	0.7	0.05	0.34	0.14	0.46	0	0.24	0	0.29	0.36	0.13	0.06	0.13	0.06	0	6.6	0.73	0.16	1.54	4.74	1.27	0	1.12	0.15	1.52	1.97	5.5	0.04	1.53	2.33
NM_015435,NM_183419	E3 ubiquitin-protein ligase RNF19A	0	20.14	2.98	0.95	4.02	3.57	0.82	0.98	3.58	22.79	32.31	1.46	5.58	6.39	1.25	8.43	1.8	4.9	2.99	1.19	2.85	3.67	3.77	0.23	1.04	3.27	1.46	8.56	4.32	0.06	5.97	1.72	7.8	4.41	15.67	12.99	35.02	8.27	56.5	14.81	14.67	6.48	4.62	14.64	12.2	4.15	6.1	10.86
NM_153341,NM_001127361	E3 ubiquitin-protein ligase RNF19B isoform a	0	108.19	25.58	44.14	88.11	21.69	14.37	10.7	17.86	12.36	52.22	36.36	14.08	13.7	3.6	29.85	19.01	18.95	10.15	26.44	26.15	9.59	16.57	3.29	26.34	27.21	24.48	137.06	100.35	4.16	25.65	15.7	108.58	22.65	17.75	27.66	50.18	23.76	746.48	76.78	78.96	22.84	32.73	15.33	34.26	10.33	26.52	161.68
NM_207116,NM_207111	E3 ubiquitin-protein ligase RNF216 isoform b	0	9.88	4.11	4.99	10.32	5.34	2.6	1.07	1.35	6.47	17.89	0.88	2.24	13.24	2.06	6.1	4.13	6.84	4.19	2.73	3.17	2.68	4.28	1.87	3.3	5.26	6	16.84	11.28	1.12	4.11	5.08	4.63	5.09	4.34	6.12	5.11	10.18	7.55	9.79	3.68	2.58	3.34	10.34	9.61	5.97	13.76	10.83
NM_018150	E3 ubiquitin-protein ligase RNF220	0	29.68	9.34	9.31	24.98	14.52	7.84	4.34	6.97	18.57	58.64	4.22	9.67	31.28	7.75	28.5	10.96	22.13	11.83	7.17	12.14	11.9	13.38	6	15.16	22.46	16.6	49.07	37.62	3.96	18.71	22.18	9.58	19.39	28.86	22.92	20.94	30.21	35.73	24.56	22.86	17.3	18.67	34.22	27.76	17.27	53.96	20.27
NM_022453	E3 ubiquitin-protein ligase RNF25	0	9.03	8.45	9.12	13.47	12.39	9.19	3.02	1.83	10.33	20.75	3.47	8.64	18.97	6.42	25.46	6.72	11.12	4.26	5.2	5.49	12.18	11.6	6.08	15.57	13.07	15.42	39.62	41.51	4.62	7.67	12.76	13.04	16.7	13.8	13.02	6.79	16.44	16.8	18.37	10.2	7.46	9.05	13.9	14.72	13.05	28.82	9.24
NM_025126,NM_194271	E3 ubiquitin-protein ligase RNF34 isoform 2	0	4.53	8.56	9.32	19.83	12.71	6.37	0.78	4.32	2.99	7.85	1.12	5.85	6.94	3.41	16.24	6.25	12.53	4.5	5.02	3.55	10.29	10.2	2.14	6.02	9.18	10.92	44.33	14.55	0.82	4.21	7.55	12.08	11.97	15.39	3.82	3.42	15.62	9.7	24	5.81	2.92	3.19	22.09	7.57	15.67	21.47	12.4
NM_006913	E3 ubiquitin-protein ligase RNF5	0	0.26	0.06	0.04	0	0	0.11	0	0.09	0.07	0	0	0	0.56	0.25	0.78	0.16	0.36	0.16	0.14	0.05	0.12	0.13	0	0	0.03	0.22	0	0	0	0	0.18	0.2	0	0.26	0.24	0.23	0.1	0.73	0.11	0	0.03	0	0.54	0.23	0.2	0.37	0.25
NM_183044,NM_005977,NM_183043	E3 ubiquitin-protein ligase RNF6	0	6.91	2.08	1.1	4.84	2.65	0.53	0.7	1.71	4.08	18.48	0.73	2.09	1.48	0.85	4.11	1.47	4.63	2.02	1.33	1.13	2.66	2.83	0.37	0.38	1.7	1.67	6.25	2.14	0.13	1.92	2.05	2.98	4.19	12.22	5.9	5.97	7.68	22.16	14.43	7.16	3.8	3.26	8.61	5.5	4.45	4.06	5.79
NM_183078,NM_003958	E3 ubiquitin-protein ligase RNF8 isoform 2	0	1.45	1.08	0.86	1.43	1.29	0.83	0.43	0.93	0.74	2.89	0.5	0.86	2.68	0.56	2.67	0.63	1.98	0.78	0.38	0.97	1.47	1.2	0.45	0.71	1.52	1.17	2.76	2.14	0.18	0.63	1.24	2.15	0.97	2.9	1.05	0.82	2.12	2.16	3.33	1.4	0.83	0.76	3.29	1.29	2.47	4.26	1.13
NM_173082,NM_001042683	E3 ubiquitin-protein ligase SHPRH isoform b	0	0.82	0.31	0.03	0.47	0.46	0.04	0.12	0.27	0.7	2.15	0.14	0.4	1.48	0.12	1.03	0.26	0.79	0.4	0.1	0.2	0.42	0.33	0.01	0	0.26	0.11	0.21	0.31	0	0.47	0.3	0.22	0.79	1.56	0.67	0.56	1.65	1.36	0.85	1.04	0.47	0.31	1.64	1.23	0.47	0.77	0.76
NM_001006610,NM_003031	E3 ubiquitin-protein ligase SIAH1 isoform b	0	4.6	1.65	0.92	2.87	2.71	0.43	1.81	1.83	6.8	8.05	1.33	3.02	12.96	0.73	4.16	1.59	2.85	1.85	0.94	1.75	1.2	2.53	0.27	0.88	2.51	0.74	4.21	1.57	0.21	2.18	2.07	2.89	2.65	8.1	8.27	10.26	4.61	15.73	3.91	7.87	3.17	2.64	4.68	5.14	1.6	2.92	5.38
NM_005067	E3 ubiquitin-protein ligase SIAH2	0	358.61	14.4	21.18	38.9	59.84	15.64	17.16	14.85	50.84	347.71	75.51	28.79	205.57	7.82	71.6	44.24	25.09	13.77	21.43	16.5	26.15	25.75	4.05	29.82	16.84	77.84	64.35	48.9	8.85	11.66	17.21	58.16	114.27	43.59	18.46	61.85	63.17	90.87	71.31	24.5	15.21	15.31	95.56	120.44	19.9	49.84	36.28
NM_020429,NM_181349	E3 ubiquitin-protein ligase SMURF1 isoform 1	0	13.71	1.66	1.15	4.6	1.37	0.99	0.43	0.67	6.19	13.8	0.68	1.09	2.78	0.36	1.92	0.84	1.77	1.15	1.17	1.59	0.86	1.31	0.33	1.42	1.65	1.61	3.21	4.95	0.45	5.01	1.06	2.89	2.19	2.43	4.87	7.73	2.41	24.86	3.93	5.05	3.92	6.14	3.25	4.63	1.11	2.75	4.59
NM_022739	E3 ubiquitin-protein ligase SMURF2	0	3.16	0.81	0.38	1.49	1.57	0.31	0.31	1.29	5.52	11.5	0.87	2.62	5.09	0.55	3.72	1.21	1.65	1.19	0.8	2.05	1.29	1.9	0.14	0.67	0.9	0.65	2.52	1.27	0.11	1.56	1.16	2.32	1.54	4.11	4.59	7.94	3.19	9.19	3.1	5.2	2.65	1.78	3.01	3.3	1.28	2.07	2.96
NM_032271	E3 ubiquitin-protein ligase TRAF7	0	19.75	10.78	10.01	25.04	15.55	7.65	4.11	7.9	13.33	21.05	6.31	7.62	23.42	7.51	24.92	14.9	16.14	9.98	8.23	13.21	13.3	12.02	8.37	19.88	18.64	18.53	37.27	30.51	5.49	13.59	20.33	9.41	12.26	13.97	9.52	10.01	18.35	29.2	20.54	16.31	9.95	10.29	30.55	22.32	11.08	21.33	16.73
NM_145214	E3 ubiquitin-protein ligase TRIM11	0	20.62	6.42	11.19	24.8	15.14	7.48	7.87	3.51	10.28	21.62	15.09	5.89	18.14	5.35	13.93	10	11.08	5.81	6.08	8.59	9.63	9.33	5.05	16.84	19.55	14.6	56.13	37.45	2.73	9.75	8.69	10.9	9.36	11.48	15.48	16.61	13.06	23.08	16.65	12.36	8.4	10.27	14.61	17.63	6.69	21.3	13.54
NM_001007278,NM_052811,NM_005798,NM_213590	E3 ubiquitin-protein ligase TRIM13 isoform 2	0	4.94	1.04	0.75	1.82	1.51	0.85	1.19	1.01	9.9	9.16	1.24	1.6	8.52	0.51	3.34	1.24	1.97	1.12	0.46	1.37	1.47	1.79	0.2	0.55	1.23	0.83	4.54	3.08	0.33	1.59	1.37	2.17	2.08	6.21	4.39	10.58	3.52	6.34	3.75	3.18	2.06	2.53	2.14	3.27	1.66	2.89	2.3
NM_016102,NM_001024940,NM_001134855	E3 ubiquitin-protein ligase TRIM17 isoform 1	0	0.29	0.39	0.16	0.21	0.48	0.09	0.02	0	0.04	0.17	0	0.35	0.93	0.06	0.75	0.16	0.32	0.19	0.11	0.37	0.21	0.17	0.21	0.92	0.25	0.51	1.9	0.46	0.06	0.28	0.83	0.11	0	0.21	0.58	0.17	0.73	0.41	0.54	0.13	0.27	0.1	0.89	0.49	0.34	0.48	0.34
NM_003141	E3 ubiquitin-protein ligase TRIM21	0	7.81	39.12	89.38	111.12	64.44	55.76	2.47	3.87	4.68	21.04	3.77	24.1	23.88	13.93	61.53	78.56	47.09	15.54	56.04	14.67	25.66	43.32	16.46	21.05	34.67	62.81	308.18	207.72	7.56	11.2	35.77	118.69	99.61	30.32	16.84	3.5	87.15	138.11	205.61	42.81	16.81	24.27	43.88	38.3	52.66	115.57	105.37
NM_006074	E3 ubiquitin-protein ligase TRIM22	0	43.53	79.06	61.57	149.62	106.26	20.54	5.34	31.06	27.56	72.49	4.69	108.32	44.8	16.48	228.02	114.36	85.77	32.54	61.11	61.09	40.79	85.15	8.95	18.41	31.95	61.81	376	260.35	2.49	40.76	36.64	278.07	92.05	102.49	44.17	35.46	216.5	1381.73	408.79	316.19	72.6	65.65	72.72	137.14	57.58	111.91	209.58
NM_033228,NM_001656,NM_033227	E3 ubiquitin-protein ligase TRIM23 isoform	0	1.76	0.36	0.2	0.74	0.83	0.1	0.1	0.13	0.91	4.44	0.12	0.66	0.65	0.05	0.76	0.19	0.82	0.28	0.19	0.18	0.51	0.44	0.02	0	0.04	0.2	0.43	0.33	0.04	0.25	0.36	0.79	0.86	1.87	0.9	1.69	0.83	6.94	2.61	2.25	0.83	0.98	1.56	1.49	0.49	0.43	1.32
NM_007028	E3 ubiquitin-protein ligase TRIM31	1	0	0	0	0	0	0	0	0	0	0	0	0	0	0	0	0	0	0	0	0	0	0	0	0	0	0	0	0	0	0	0	0	0	0	0	0	0	0	0	0	0	0	0	0	0	0	0
NM_001099679,NM_012210	E3 ubiquitin-protein ligase TRIM32	0	0.41	0.6	0.8	1.28	1.3	0.46	0.11	0.16	0.26	2.24	0.3	0.43	1.39	0.46	1.23	0.4	1.91	0.53	0.38	0.17	0.71	0.7	0.18	0.6	0.65	0.73	5.31	0.33	0.03	0.43	1.27	0.64	0.72	1.55	0.81	0.51	1.48	1.11	1.05	0.27	0.28	0.31	4.03	0.87	1.33	2.58	1.13
NM_015906,NM_033020	E3 ubiquitin-protein ligase TRIM33 isoform	0	3.54	0.85	0.47	2.56	1.01	0.38	0.91	1.27	6.47	12.21	0.57	2.19	2.22	0.53	5.71	1.47	3.18	1.43	1.02	1.55	0.98	1.53	0.12	0.4	0.97	0.7	4.09	0.89	0.13	1.77	0.84	2.34	5.95	11.39	6.75	9.7	8.53	15.73	11.55	8.86	4.56	2.59	5.9	8.57	3.5	4.88	6.46
NM_018700,NM_001017397,NM_001017398	E3 ubiquitin-protein ligase TRIM36 isoform 1	0	1.42	0.02	0.03	0.1	0.08	0.03	0.1	0.05	0.18	0.73	0.06	0.17	0	0.1	0.3	0.05	0.05	0.09	0	0.1	0.09	0.07	0	0.16	0.05	0.01	0	0.33	0	0.01	0.13	0	0.14	0.14	0.42	1.47	0.21	0.25	0.16	0.18	0.17	0.05	0.1	0.06	0.03	0.06	0.12
NM_001005207,NM_015294	E3 ubiquitin-protein ligase TRIM37	0	1.25	0.88	0.35	1.2	0.98	0.24	0.21	1.19	1.45	5.18	0.31	1.58	1.57	0.44	2.03	0.49	1.91	0.76	0.33	0.64	1.38	0.95	0.16	0.38	0.66	0.33	2.61	0.94	0.06	0.58	0.77	1.25	1.33	4.18	2.25	2.77	2.27	5.26	3.96	2.59	1.52	1.54	3.32	2.75	1.68	2.7	2.1
NM_033549,NM_201627	E3 ubiquitin-protein ligase TRIM41 isoform 1	0	12.72	6.92	6.82	14.26	10.29	5.86	2.78	3.61	3.87	12.69	2.65	7.64	14.9	5.8	13.86	9.12	10.87	5.82	5.42	10.99	7.87	10.21	5.31	12.65	18.81	12.95	35.47	23.25	2.99	7.85	11.04	8.62	10.57	9.39	5.87	5.98	10.79	18.67	13.3	10.93	6.79	6.45	17.17	14.46	7.53	17.99	12.43
NM_178125	E3 ubiquitin-protein ligase TRIM50	1	0	0	0	0	0	0.02	0	0	0	0	0	0	0	0.01	0	0	0	0.01	0	0.05	0	0	0	0	0.04	0	0	0	0	0	0.24	0	0	0	0	0	0	0	0	0	0	0	0	0	0	0.11	0
NM_032588	E3 ubiquitin-protein ligase TRIM63	1	0	0	0.07	0	0	0	0	0	0	0	0	0.03	0	0	0	0	0	0	0	0	0	0	0	0	0	0	0	0	0	0	0	0	0	0	0	0	0	0	0	0	0	0.05	0	0	0	0	0
NM_018073	E3 ubiquitin-protein ligase TRIM68	0	0.39	1.31	1.11	2.91	0.98	0.68	0.12	0.44	0.24	3.1	0	0.62	2.04	0.42	0.98	0.49	2	0.74	0.53	0.84	0.86	0.87	0.27	1.11	0.9	1.57	3.49	2.51	0.05	1.28	1.13	2.5	0.65	1.8	0.75	0.46	2.16	2.25	2.24	0.57	0.51	0.33	3.93	1.52	1.6	3.12	1.59
NM_015163,NM_052978	E3 ubiquitin-protein ligase TRIM9 isoform 1	1	0	0.05	0.01	0.67	0.08	0.01	0	0.01	0.03	0.08	0.05	0.07	0.28	0	0.11	0	0.15	0.02	0.05	0.04	0.03	0.03	0	0	0.08	0.03	0	0	0	0.08	0.03	0	0.11	0.13	0.02	0.03	0.15	0.13	0.33	0.13	0.01	0.09	0.15	0.36	0.02	0.17	0.29
NM_001001894,NM_003316	E3 ubiquitin-protein ligase TTC3	0	3.28	1.05	0.5	1.14	1.42	0.54	0.41	0.56	2.36	5.42	0.51	1.7	5.09	0.66	2.35	0.7	1.99	0.99	0.38	1.11	1.77	1.03	0.29	0.81	1.27	1.2	3.89	0.89	0.1	0.99	1	1.45	1.04	3.24	2.63	2.3	3.1	2.5	1.94	1.27	1.18	1.02	3.85	2.85	1.65	4	2.71
NM_005802	E3 ubiquitin-protein ligase Topors isoform 1	0	5.78	1.33	0.89	3.07	3	0.74	0.37	1.19	2.36	9.94	0.87	1.79	3.98	0.83	3.74	2.82	3.83	1.83	2.72	0.98	1.63	2.61	0.29	0.66	1.53	1.34	7.04	2.03	0.11	0.99	1.11	3.86	5.52	5.8	2.87	6.21	6.1	18.45	14.9	2.91	1.25	2.03	5.46	5.08	2.09	3.43	13.27
NM_174916	E3 ubiquitin-protein ligase UBR1	0	1.25	1.27	0.53	2.2	1.04	0.32	0.35	1.17	2.11	4.53	0.11	2.62	2.13	0.39	3.79	1.66	1.9	0.77	0.56	1.12	1.08	1.41	0.12	0.33	0.98	0.98	5.5	1.42	0.1	0.76	1.21	5.37	1.29	4.44	2.86	3.82	4.68	17.53	6.12	6.81	1.8	1	4.44	3.95	2.06	2.33	3.49
NM_001184801,NM_015255	E3 ubiquitin-protein ligase UBR2 isoform 2	0	9.85	4.8	4.57	11.33	7.56	2.92	1.19	3.32	6.21	9.17	2.03	11.46	14.9	2.67	19.03	7.84	8.07	3.66	5.49	4.69	5.4	9.64	1.37	2.9	5.14	4.1	25.16	11.15	0.81	5.12	6.74	16.71	16.52	17.8	6.84	10.74	15.8	29.61	28.62	21.57	9.76	4.6	12.42	16.86	7.22	14.81	19.62
NM_172070	E3 ubiquitin-protein ligase UBR3	0	3.04	0.51	0.26	1.15	0.5	0.2	0.26	0.75	2.29	5.22	0.22	1.11	1.48	0.34	2.13	0.68	1.18	0.68	0.28	0.47	0.68	0.75	0.04	0.09	0.41	0.36	1.88	0.74	0.07	0.71	0.52	0.68	2.04	6.11	1.69	2.8	3.16	7.32	4.67	4.13	1.47	0.94	2.6	2.88	1.15	2.35	2.77
NM_020765	E3 ubiquitin-protein ligase UBR4	0	21.49	4.07	6.18	11.35	4.98	4.4	2.83	0.89	7.3	10.51	2.79	2.62	7.68	2.41	7.45	6.62	3.41	1.97	3.08	3.7	2.8	4.12	1.53	3.58	5.05	6.94	17.07	11.71	1.27	2.61	3.56	9.25	8.03	4.27	6.86	10.88	6.81	19.31	10.43	6.72	3.27	5.32	10.99	6.21	5.14	13.87	10.27
NM_015902	E3 ubiquitin-protein ligase UBR5	0	8.09	2.46	0.85	3.69	2.26	0.56	0.9	3.08	9.45	14.26	0.69	5.21	6.2	0.91	5.89	2.12	3.55	1.94	1.48	2.46	3.02	3.88	0.25	0.28	1.96	1.39	4.98	1.83	0.17	2.2	1.83	9.08	2.54	8.38	5.27	15.72	6.56	30.44	10.82	12.67	3.88	3.25	8.45	5.79	2.93	6.13	5.87
NM_001048201,NM_013282	E3 ubiquitin-protein ligase UHRF1 isoform 1	0	0.39	1	0.51	0.44	1.04	0.16	0.02	0.3	0.04	0.67	0.07	0.19	0.46	0.1	0.66	0.26	1.16	0.28	0.05	0.33	0.28	0.22	0.29	0.43	0.15	1.09	1.16	0.2	0	0.66	0.24	0.06	0	0.95	0.23	0.08	0.95	1.01	1.23	0.57	0.11	0.14	2.51	0.49	0.72	0	0.72
NM_152896	E3 ubiquitin-protein ligase UHRF2	0	4.77	2.41	1.35	2.66	3.95	1.1	1.47	1.59	5.95	16.82	1.52	6.72	5.65	1.63	7.2	2.45	4.95	2.05	1.15	3.67	3.38	3.5	0.35	0.76	2.46	1.77	8.34	2.03	0.3	3.23	1.8	3.2	3.23	10.18	8.06	11.94	6.54	11.57	8.38	7.11	3.99	3.24	6.97	6.34	4.81	5.73	4.11
NM_032268	E3 ubiquitin-protein ligase ZNRF1	0	3.37	1.59	2.23	1.36	1.7	0.63	0.25	1.49	1.47	5.99	0.48	1.54	1.02	0.62	2.74	0.98	1.45	0.78	0.49	1	1.32	1.11	1.61	1.24	1.24	2.5	7.04	2.03	0.21	0.86	1.8	1.73	1.15	1.28	0.89	1.34	1.24	3.17	2.24	1.45	0.66	0.76	5.54	2.17	2.37	2.7	1.98
NM_147128	E3 ubiquitin-protein ligase ZNRF2	0	3.81	1.33	0.57	4.47	2.45	0.52	0.68	1.99	2.74	6.23	0.52	1.48	0.37	0.77	3.81	1.77	2.59	1.15	0.49	1.97	1.53	2.17	0.22	1.05	1.2	0.84	10.65	2.53	0.2	1.54	1.58	0.96	3.48	8.15	3.01	4.55	4.86	11.48	7.24	6.81	3.06	1.03	4.19	3.24	2.18	2.24	4.02
NM_182521	E3 ubiquitin-protein ligase ZSWIM2	1	0	0	0	0	0	0	0	0	0	0	0	0	0	0.01	0.05	0	0	0	0	0	0	0	0	0	0	0	0	0	0	0	0	0	0	0	0	0	0	0	0	0	0	0	0	0	0	0	0
NM_013446,NM_001145125	E3 ubiquitin-protein ligase makorin-1 isoform 1	0	140.23	7.17	9.33	27.52	49.29	7.62	12.18	7.21	38.7	89.15	43.75	25.15	256.38	6.79	51.86	82.85	13.34	12.6	19.72	13.26	12.39	19.17	2.05	23.46	12.48	16.48	40.58	40.35	3.35	9.81	13.44	49.76	190.12	41.93	28.67	40.96	60.71	81.83	74.82	50.96	23.66	21.76	81.61	113.23	11.61	99.49	39.18
NM_004562,NM_013988,NM_013987	E3 ubiquitin-protein ligase parkin isoform 1	1	0	0	0.03	0.03	0	0	0.01	0	0.04	0.19	0.05	0	0	0	0	0	0.01	0.01	0	0.02	0	0	0	0	0	0	0	0	0.01	0.02	0	0	0	0	0.05	0	0.03	0	0	0.01	0.02	0.01	0.12	0.06	0	0	0.18
NM_001017368,NM_057178	E3 ubiquitin-protein ligase rififylin	0	12.53	4.77	6.41	22.67	8.2	3.44	1.59	1.96	6.07	23.14	2.33	8.2	10.74	1.78	11.97	10.14	8.22	3.78	4.47	3.08	2.12	4.73	0.81	3.49	4.61	3.15	25.74	7.35	0.44	5.55	4.13	15.59	11.76	13.96	11.21	6.61	9.35	40.3	16.45	14.98	4.16	5.91	14.45	11.61	5.65	12.68	23.41
NM_172230,NM_032431	E3 ubiquitin-protein ligase synoviolin isoform	0	30.62	9.87	6.73	19.12	6.41	8.17	1.04	4.07	11.21	20.37	1.92	7.02	9.72	3.8	11.22	4.55	9.36	5.48	3.17	10.2	11.3	7.48	3.65	9.46	12.57	19.61	29.24	16.73	0.99	6.3	5.98	3.49	3.84	14.61	6.52	14.86	11.74	22.16	8.45	7.41	5.16	6.7	27.86	11.55	7.69	16.57	15.31
NM_005082	E3 ubiquitin/ISG15 ligase TRIM25	0	41.97	23.52	48.68	41.29	45.15	20.98	2.27	5.08	15.82	14.37	3.01	26.07	22.49	7.53	49.42	85.12	16.62	9.41	20.94	23.02	16.87	35.68	7.01	14.74	22.4	25.67	152.25	107.2	2.92	15.25	14.51	159.88	59.14	24.01	18.5	35.28	51.39	324.76	107.56	122.79	25.57	35.04	20.67	40.18	20.13	37.16	116.19
NM_032437	EF-hand calcium-binding domain-containing	0	0.41	0.7	0.07	0.09	0.94	0.08	0.08	0.62	0.3	1.05	0.16	0.63	0.56	0.17	0.8	0.23	0.68	0.36	0.11	0.31	0.9	0.43	0.04	0.52	0.13	0.15	3.36	0	0.07	0.38	0.35	0.5	0.25	1.7	0.74	0.43	1.54	1.3	0.58	0.61	0.18	0.13	0.97	0.23	0.85	0.17	0.67
NM_032328,NM_001143943	EF-hand calcium-binding domain-containing	0	0.41	2.14	5.7	1.32	1.82	1.35	0.22	0.97	0.44	0.49	0.2	1.86	0.74	0.42	8.09	2.64	2.61	0.38	3.56	4.22	0.73	1.6	0.38	0.19	2.52	2.15	28.79	1.61	1.04	0.66	1.77	13.61	1.97	2.2	0.69	1.23	4.23	23.97	16.4	8.05	3.16	2.12	0.94	3.49	2.17	2.01	1.13
NM_173584	EF-hand calcium-binding domain-containing	0	5.52	1.59	1.27	0.55	1.77	2.73	4.58	0.97	1.12	2.8	5.69	2.6	7.22	1.99	3.31	7.84	2.77	1.01	0.97	4.42	5.34	3.89	2.79	5.43	6.65	2.74	6.08	7.74	1.39	3.32	1.67	13.64	0.82	1.79	1.89	1.08	2.37	5.45	1.52	1.91	0.62	0.87	1.84	2.75	0.3	3.38	3.76
NM_001144958,NM_001144959,NM_032680	EF-hand calcium-binding domain-containing	0	5.03	0.52	0.34	1.11	0.21	0.29	0.65	0.76	1.24	6.41	0.6	1.4	3.52	0.85	2.76	1.24	1.88	0.78	0.71	1.18	0.54	0.81	0.29	1.87	2	1.28	2.48	2.25	0.06	2.46	1.21	0	1.61	3.51	3.63	1.81	2.3	11.16	2.66	4.95	2.51	2.88	3.45	4.27	1.48	2.95	2.49
NM_001145053,NM_198529	EF-hand calcium-binding domain-containing	0	0.31	0.05	0.04	0	0.11	0.06	0.02	0.07	0.35	0.33	0.02	0.06	0.37	0.01	0.04	0.14	0.08	0.06	0	0.09	0.05	0.12	0.05	0.14	0.21	0.13	0.45	0.13	0.02	0.43	0.08	0.06	0.07	0.03	0.17	0.19	0.03	0.16	0.14	0.07	0.06	0.05	0.07	0.16	0.04	0.09	0.15
NM_001144933,NM_173503	EF-hand calcium-binding domain-containing	0	0	0	0	0	0	0	0	0	0	0	0	0	0	0	0	0.21	0	0	0	0	0	0	0	0	0	0	0	0	0	0	0	0	0	0	0	0	0	0	0	0	0	0	0	0	0	0	0
NM_198856,NM_022785	EF-hand calcium-binding domain-containing	0	0	0.01	0	0.02	0.04	0	0.01	0	0	0.03	0	0.02	0	0	0.07	0.12	0	0.01	0.01	0.01	0.01	0	0	0	0	0	0	0	0	0	0	0	0	0.03	0	0	0.03	0	0.02	0	0	0	0	0	0	0.09	0
NM_001171183	EF-hand calcium-binding domain-containing	1	0	0	0	0	0	0	0.06	0	0	0	0	0	0	0	0	0	0	0	0	0	0	0	0	0	0	0	0	0	0	0	0	0	0	0	0	0.12	0	0	0	0	0	0.06	0	0	0	0	0
NM_001142857,NM_024593	EF-hand calcium-binding domain-containing	1	0	0	0	0	0	0	0	0	0	0	0	0.09	0	0	0.2	0	0	0.01	0	0.01	0	0	0	0	0	0	0	0	0	0	0	0	0	0	0	0	0	0	0	0	0	0	0	0	0	0	0.07
NM_152726	EF-hand domain-containing family member A1	0	11.08	5.72	1.46	5.92	7.64	2.09	1.84	5.55	7.27	21.78	1.89	8.95	7.5	2.71	17.66	5.9	12.23	5.52	3.86	2.29	6.26	9.56	0.48	1.18	3.9	2.82	13.48	5.85	0.36	3.44	5.04	23.22	7.92	26.38	13.1	12.62	21.02	75.08	37.38	26.51	8.2	6.7	19.13	13.1	9.65	10.35	12.26
NM_181723	EF-hand domain-containing family member A2	1	0.07	0	0	0	0	0	0.01	0	0.02	0.65	0.02	0.01	0	0.01	0.09	0	0.03	0.03	0	0.01	0	0.05	0	0	0.03	0.02	0	0	0	0	0.04	0	0.07	0.11	0	0.12	0.21	0.22	0.13	0	0.03	0	0	0.26	0.01	0.14	0.19
NM_144715	EF-hand domain-containing family member B	1	0	0.01	0	0	0	0	0	0.04	0.06	0	0	0.04	0.19	0	0	0	0	0.05	0	0.02	0	0	0	0	0.09	0	0	0	0	0.2	0	0	0	0.15	0.02	0.06	0	0	0	0.09	0	0.05	0.05	0	0	0.14	0.05
NM_025184	EF-hand domain-containing family member C2	0	0.77	0.1	0.06	0.07	0.06	0.02	0.02	0.1	0.11	0.54	0	0	0.19	0	0.62	0.23	0.21	0.07	0.03	0.09	0.07	0.21	0	0	0	0.08	0.51	0	0.04	0.06	0	0.07	0.18	0.19	0.37	0.26	0.76	0.92	0.34	0.36	0.16	0.1	0.18	0.68	0.11	0.68	0.82
NM_018100,NM_001172420	EF-hand domain-containing protein 1 isoform 1	0	0.39	0.26	0.04	0.22	0.36	0.2	0.12	0.26	0.6	0.81	0.27	0.52	1.76	0.17	1.09	0.26	0.3	0.36	0.08	0.48	0.7	0.61	0.04	0	0.6	0.11	1.07	0.31	0.05	0.16	0.37	0.22	0.36	1.28	0.66	0.38	0.73	0.35	0.52	0.6	0.22	0.23	0.87	0.55	0.27	0.45	0.46
NM_145231	EF-hand domain-containing protein C14orf143	0	0	0.73	0.88	0.96	0.29	1.07	0.18	2.54	0	0.89	0	2.15	0.93	0.35	0.96	0.26	0.81	0.75	0.23	0.3	2.06	2.75	0.82	0	0.65	0.51	1.03	4.73	0	1.02	1.3	1.71	0	3.22	0.2	0.5	1.18	0.41	1.27	0.39	0.65	0.44	2.43	0.71	2.04	1.79	0.11
[truncated: 17,287 more rows]
[truncated: 69 more columns]

## Sheet: (B)Pf
Symbol	Definition	Expressed at least one patient (yes=0)	Patient ID: 4	5	6	7	8	9	11	12	13	14	15	16	17	18	19	20	21	22	23	24	25	26	27	28	29	30	31	32	33	34	36	37	38	39	40	41	42	43	44	45	46	47	48	49	50	51	52
[truncated: 5,523 more rows]
[truncated: 69 more columns]

## Sheet: (C)Human CTL(healty)
Symbol	Definition	Expressed at least one patient (yes=0)	Patient ID: 401	402	403	404	405	406	407	408	409	410	411	412	413	414	415	416	417	418	419	420	421	422	423	424	425
[truncated: 18,684 more rows]

[truncated: 3 more sheets: (D)Pf CTL(healty), (E)Human CTL(other pathogens), (F)Pf CTL(other pathogens)]
