# Supplementary material for: Interactive transcriptome analysis of malaria patients and infectingPlasmodium falciparum
Source: HighWire-hosted journal article supplement (doi:10.1101/gr.158980.113), 2014-08-04
Supplement: Supplemental_Table_4.xlsx [file Supplemental_Table_4.xlsx]

## Sheet: Pf_FIKK
symbol	definition	group_id	mean	median	lower	min	max	upper	stdev
PFE0045c	serine/threonine protein kinase, FIKK family	1056	-0.65	-0.23	-2.04	-2.04	1.98	0.62	2.48
PFI0100c	serine/threonine protein kinase, FIKK family	2584	-0.27	0.28	-2.04	-2.04	2.78	0.88	4.18
PF11_0510	serine/threonine protein kinase, FIKK family	3989	-0.21	0.6	-2.04	-2.04	2.11	0.98	1.92
PFI0115c	serine/threonine protein kinase, FIKK family	2587	0.04	0.59	-2.04	-2.04	2.22	1.27	1.74
MAL7P1.144	serine/threonine protein kinase, FIKK family	2089	0.19	0.63	-2.04	-2.04	3.55	1.26	4.14
MAL7P1.175	serine/threonine protein kinase, FIKK family, pseudogene	2147	-0.47	-0.58	-2.04	-2.04	2.48	1.14	2.43
PFA0130c	serine/threonine protein kinase, FIKK family	41	0.84	1.2	0.64	-2.04	3.13	1.75	2.48
PFI0095c	serine/threonine protein kinase, FIKK family	2583	0.86	1.43	0.88	-2.04	2.72	1.82	1.38
PFC0060c	serine/threonine protein kinase, FIKK family	481	1.02	1.51	1.06	-2.04	2.82	1.88	1.65
PFI0125c-a	serine/threonine protein kinase, FIKK family	2590	0.94	1.47	0.79	-2.04	3	1.86	1.85
PFI0125c-b	serine/threonine protein kinase, FIKK family	2591	0.94	1.47	0.79	-2.04	3.01	1.87	1.85
PFL0040c	serine/threonine protein kinase, FIKK family	4018	1.25	1.75	1.26	-2.04	3.1	2.1	1.72
PFD1175w	serine/threonine protein kinase, FIKK family	1025	1.25	1.71	1.06	-2.04	3.27	2.28	1.8
PFI0105c	serine/threonine protein kinase, FIKK family	2585	1.41	1.9	1.47	-2.04	3.13	2.26	1.36
PF10_0380	serine/threonine protein kinase, FIKK family	3416	1.48	1.92	1.32	-2.04	3.58	2.33	2.08
PF14_0733	serine/threonine protein kinase, FIKK family	6226	1.35	1.94	1.37	-2.04	3.13	2.28	1.42
PFI0110c	serine/threonine protein kinase, FIKK family	2586	1.62	2.04	1.49	-2.04	3.75	2.35	2.57
PF10_0160	serine/threonine protein kinase, FIKK family	3171	1.62	2.07	1.7	-2.04	3.25	2.31	1.41
PFD1165w	serine/threonine protein kinase, FIKK family	1023	1.71	2.11	1.86	-2.04	3.14	2.38	1.03
PFI0120c	serine/threonine protein kinase, FIKK family	2588	1.61	2.12	1.57	-2.04	3.31	2.49	1.41
PF14_0734	serine/threonine protein kinase, FIKK family	6227	2.01	2.51	2.11	-2.04	3.85	2.74	1.6

## Sheet: Pf_PFEMP
symbol	definition	group_id	mean	median	lower	min	max	upper	stdev
PF07_0048	erythrocyte membrane protein 1, PfEMP1	1925	-1.56	-2.04	-2.04	-2.04	2.01	-1.09	8.5
PFD0020c	erythrocyte membrane protein 1, PfEMP1	757	-1.22	-2.04	-2.04	-2.04	0.99	-0.37	2.74
PFD0625c	erythrocyte membrane protein 1, PfEMP1	895	-1.72	-2.04	-2.04	-2.04	0.26	-1.69	3.17
PFL1950w	erythrocyte membrane protein 1, PfEMP1	4454	-1.27	-2.04	-2.04	-2.04	1.88	-0.45	6.54
PF07_0051	erythrocyte membrane protein 1, PfEMP1	1940	-1.68	-2.04	-2.04	-2.04	0.75	-2.04	4.08
PFF1595c	erythrocyte membrane protein 1, PfEMP1	1778	-1.47	-2.04	-2.04	-2.04	0.41	-0.79	2.28
PFI0005w	erythrocyte membrane protein 1, PfEMP1	2559	-1.63	-2.04	-2.04	-2.04	0.6	-1.21	3.5
PF08_0140	erythrocyte membrane protein 1, PfEMP1	2182	-1.29	-2.04	-2.04	-2.04	3.06	-0.46	10.39
PFF0010w	erythrocyte membrane protein 1, PfEMP1	1405	-1.2	-2.04	-2.04	-2.04	1.68	-0.42	4.9
PFL0005w	erythrocyte membrane protein 1, PfEMP1	4006	-1.02	-0.99	-2.04	-2.04	2.02	-0.21	5.26
PFE1625c	erythrocyte membrane protein 1 (PfEMP1), pseudogene	1399	-1.92	-2.04	-2.04	-2.04	0.35	-2.04	4.8
PFD1245c	erythrocyte membrane protein 1, PfEMP1	1041	-0.98	-1.04	-2.04	-2.04	1.04	0.01	2.05
MAL7P1.187	erythrocyte membrane protein 1, PfEMP1	2174	-1.53	-2.04	-2.04	-2.04	0.68	-1.04	3.15
PFB1055c	erythrocyte membrane protein 1, PfEMP1	460	-1.61	-2.04	-2.04	-2.04	0.55	-1.29	2.94
PFF0030c	erythrocyte membrane protein 1 (PfEMP1), pseudogene	1412	-1.5	-2.04	-2.04	-2.04	1.15	-0.67	3.35
PFF1580c	erythrocyte membrane protein 1, PfEMP1	1773	-1.26	-2.04	-2.04	-2.04	0.97	-0.45	2.56
PFL0940c	erythrocyte membrane protein 1 (PfEMP1), pseudogene	4220	-1.18	-2.04	-2.04	-2.04	1.99	-0.38	5.53
PFC1110w	erythrocyte membrane protein 1 (PfEMP1), exon2, pseudogene	747	-1.64	-2.04	-2.04	-2.04	0.71	-2.04	3.28
PF08_0141	erythrocyte membrane protein 1, PfEMP1	2181	-1.12	-1.69	-2.04	-2.04	1.79	-0.11	4.94
PF08_0107	erythrocyte membrane protein 1, PfEMP1	2278	-1.44	-2.04	-2.04	-2.04	0.64	-0.91	2.48
MAL7P1.56	erythrocyte membrane protein 1, PfEMP1	1945	-1.7	-2.04	-2.04	-2.04	0.63	-2.04	3.75
PFA0695c	erythrocyte membrane protein 1 (PfEMP1), exon2, pseudogene	170	-1.66	-2.04	-2.04	-2.04	1.03	-2.04	3.74
PF11_0008	erythrocyte membrane protein 1, PfEMP1	3451	-1.14	-1.69	-2.04	-2.04	1.76	-0.34	4.78
PFL2665c	erythrocyte membrane protein 1, PfEMP1	4626	-1.5	-2.04	-2.04	-2.04	0.65	-0.76	2.65
PFD0615c	erythrocyte membrane protein 1, PfEMP1	891	-1.34	-2.04	-2.04	-2.04	2.02	-0.58	5.87
PFC0005w	erythrocyte membrane protein 1, PfEMP1	465	-1.71	-2.04	-2.04	-2.04	0.42	-1.51	3.8
PFA0005w	erythrocyte membrane protein 1, PfEMP1	4	-1.32	-2.04	-2.04	-2.04	1.43	-0.63	4.39
MAL13P1.356	erythrocyte membrane protein 1, PfEMP1	5403	-1.65	-2.04	-2.04	-2.04	0.71	-1.29	4.13
PF10_0001	erythrocyte membrane protein 1, PfEMP1	2989	-1.61	-2.04	-2.04	-2.04	0.81	-1.39	3.61
PF07_0049	erythrocyte membrane protein 1, PfEMP1	1929	-1.15	-2.04	-2.04	-2.04	2.14	-0.27	6.44
PFD1015c	erythrocyte membrane protein 1, PfEMP1	990	-1.56	-2.04	-2.04	-2.04	1.18	-1.09	4.68
PFA0765c	erythrocyte membrane protein 1, PfEMP1	188	-1.62	-2.04	-2.04	-2.04	0.72	-1.51	3.32
MAL13P1.1	erythrocyte membrane protein 1, PfEMP1	4631	-1.56	-2.04	-2.04	-2.04	1.18	-1.04	4.92
PFD1025w	erythrocyte membrane protein 1 (PfEMP1)-like pseudogene	993	-1.7	-2.04	-2.04	-2.04	1.42	-2.04	5.8
PF07_0050	erythrocyte membrane protein 1, PfEMP1	1937	-1.86	-2.04	-2.04	-2.04	0.83	-2.04	5.89
PFB1045w	erythrocyte membrane protein 1 (PfEMP1), truncated	456	-1.22	-2.04	-2.04	-2.04	2.08	-0.1	4.67
PFL1960w	erythrocyte membrane protein 1, PfEMP1	4458	-1.18	-2.04	-2.04	-2.04	2.1	-0.33	5.96
PFI1820w	erythrocyte membrane protein 1, PfEMP1	2982	-1.78	-2.04	-2.04	-2.04	0.74	-2.04	4.39
PFD0140w	erythrocyte membrane protein 1 (PfEMP1), pseudogene	789	-1.73	-2.04	-2.04	-2.04	1.28	-2.04	4.53
MAL7P1.55	erythrocyte membrane protein 1, PfEMP1	1943	-1.41	-2.04	-2.04	-2.04	0.73	-0.65	2.68
MAL7P1.50	erythrocyte membrane protein 1, PfEMP1	1935	-0.83	-0.59	-2.04	-2.04	2.57	0.06	5.95
PFL0020w	erythrocyte membrane protein 1, PfEMP1	4013	-1.43	-2.04	-2.04	-2.04	1.33	-0.84	4.45
PF08_0103	erythrocyte membrane protein 1, PfEMP1	2286	-1.17	-2.04	-2.04	-2.04	1.22	-0.33	2.93
PFL0935c	erythrocyte membrane protein 1, PfEMP1	4218	-0.46	-0.22	-2.04	-2.04	3.06	0.36	5.76
PFE0005w	erythrocyte membrane protein 1, PfEMP1	1046	-1.71	-2.04	-2.04	-2.04	0.56	-2.04	3.81
PFE1640w	erythrocyte membrane protein 1 (PfEMP1), truncated	1403	-0.75	-0.53	-2.04	-2.04	1.9	0.15	3.47
PF11_0521	erythrocyte membrane protein 1, PfEMP1	4005	-1.57	-2.04	-2.04	-2.04	1.33	-1.21	5.31
PF13_0003	erythrocyte membrane protein 1, PfEMP1	4635	-1.53	-2.04	-2.04	-2.04	0.95	-0.81	3.8
MAL7P1.61	erythrocyte membrane protein 1 (PfEMP1), pseudogene	1950	-0.68	-0.26	-2.04	-2.04	1.76	0.55	2.28
PFD0995c	erythrocyte membrane protein 1, PfEMP1	984	-0.96	-1.09	-2.04	-2.04	2.46	-0.09	5.12
PFF0845c	erythrocyte membrane protein 1, PfEMP1	1602	-1.55	-2.04	-2.04	-2.04	1.14	-1.14	4.15
PFL1970w	erythrocyte membrane protein 1, PfEMP1	4464	-0.95	-1.14	-2.04	-2.04	2.41	-0.1	5.57
PF10_0012	erythrocyte membrane protein 1 (PfEMP1), truncated	2999	-1.51	-2.04	-2.04	-2.04	1.06	-2.04	2.96
PFD0655w	erythrocyte membrane protein 1 (PfEMP1), exon1, pseudogene	904	-0.87	-2.04	-2.04	-2.04	2.31	0.31	3.6
PF11_0007	erythrocyte membrane protein 1, PfEMP1	3449	-1.56	-2.04	-2.04	-2.04	0.73	-1.04	3.47
PFL1947c	erythrocyte membrane protein 1 (PfEMP1), pseudogene	4453	-0.94	-2.04	-2.04	-2.04	2.81	0.39	6.03
PFC0115c	erythrocyte membrane protein 1 (PfEMP1), pseudogene	493	-1.1	-2.04	-2.04	-2.04	3.39	-0.36	10.06
PFL0030c	erythrocyte membrane protein 1, PfEMP1	4016	-0.72	-0.63	-2.04	-2.04	2.14	0.22	3.92
PF08_0106	erythrocyte membrane protein 1, PfEMP1	2279	-1.27	-2.04	-2.04	-2.04	2.01	-0.46	6.09
PF08_0142	erythrocyte membrane protein 1, PfEMP1	2180	-0.88	-0.99	-2.04	-2.04	2.17	0.09	4.34
PFC1120c	erythrocyte membrane protein 1, PfEMP1	751	-1.63	-2.04	-2.04	-2.04	0.75	-1.39	4.11
PF14_0001	erythrocyte membrane protein 1 (PfEMP1), truncated, pseudogene	5407	-0.81	-2.04	-2.04	-2.04	2.23	0.35	3.43
MAL8P1.220	erythrocyte membrane protein 1, PfEMP1	2549	-1.74	-2.04	-2.04	-2.04	0.74	-1.99	5.47
MAL7P1.214	VAR pseudogene fragment, erythrocyte membrane protein 1 (PfEMP1) pseudogene fragment	1789	-0.62	-0.81	-2.04	-2.04	2.62	0.68	4.21
PFL1955w	erythrocyte membrane protein 1, PfEMP1	4455	-1.46	-2.04	-2.04	-2.04	1.84	-0.76	7.07
PFL0945w	erythrocyte membrane protein 1 (PfEMP1), exon2, pseudogene	4221	-1.1	-2.04	-2.04	-2.04	1.81	-0.08	2.96
PFE1620c	erythrocyte membrane protein 1, PfEMP1	1398	-1.83	-2.04	-2.04	-2.04	1.11	-2.04	4.47
PFA0755w	erythrocyte membrane protein 1 (PfEMP1), pseudogene	185	-1.95	-2.04	-2.04	-2.04	0.79	-2.04	6.25
PF10_0406	erythrocyte membrane protein 1, PfEMP1	3443	-1.39	-2.04	-2.04	-2.04	1.15	-0.69	3.77
PFI1830c	erythrocyte membrane protein 1, PfEMP1	2986	-1.46	-2.04	-2.04	-2.04	1.73	-0.73	6.48
PFD0005w	erythrocyte membrane protein 1, PfEMP1	752	-1.52	-2.04	-2.04	-2.04	1.05	-0.95	4.22
PFB0010w	erythrocyte membrane protein 1, PfEMP1	195	-1.77	-2.04	-2.04	-2.04	1.04	-2.04	6.56
PFB0974c	erythrocyte membrane protein 1 (PfEMP1), truncated, degenerate	435	-1.72	-2.04	-2.04	-2.04	1.68	-2.04	4.36
PFB0020c	erythrocyte membrane protein 1 (PfEMP1), exon2	198	-1.92	-2.04	-2.04	-2.04	1.23	-2.04	8.13

## Sheet: Pf_ribosomal
symbol	definition	group_id	mean	median	lower	min	max	upper	stdev
PFB0467w	50S ribosomal protein L33, putative	312	-1.52	-2.04	-2.04	-2.04	2.92	-2.04	6.17
PF14_0132	40S ribosomal protein S9A, putative	5561	-0.43	-0.56	-2.04	-2.04	3.6	1	4.81
MAL13P1.272	60S ribosomal protein L7-2, putative	5203	0.67	1.45	-0.4	-2.04	3.05	1.83	2.09
PF07_0121	60S ribosomal subunit export protein, putative	2124	1.43	1.89	1.26	-2.04	3.02	2.25	1.31
PFE0300c	60S ribosomal subunit protein L24-2, putative	1111	1.55	2.09	1.52	-2.04	4.1	2.44	3.4
PFD0455w	40S ribosomal processing protein, putative	856	1.92	2.16	1.89	-2.04	4.63	2.46	4.23
PFD0960c	60S ribosomal protein L7ae/L30e, putative	976	1.81	2.26	1.95	-2.04	3.9	2.5	2.46
PF14_0391	60S ribosomal protein L1, putative	5847	2.15	2.62	2.23	-2.04	3.95	2.81	1.65
PF11_0312	60S ribosomal protein L38e, putative	3780	2.38	2.94	2.31	-2.04	4.25	3.19	1.89
PFC0200w-a	60S ribosomal protein L44, putative	518	2.4	2.95	2.53	-2.04	3.9	3.19	1.13
PFE0185c	60S ribosomal protein L31, putative	1086	2.45	2.99	2.59	-2.04	3.89	3.19	1.04
PF10_0187	60S ribosomal protein L30e, putative	3205	2.34	2.99	2.54	-2.04	4.4	3.2	1.91
PF14_0141	60S ribosomal protein L10, putative	5570	2.76	3.06	2.79	-2.04	4.07	3.25	1.08
PF14_0027	40S ribosomal protein S31/UBI, putative	5439	2.64	3.05	2.63	-2.04	3.94	3.27	0.99
PF08_0039	60S ribosomal protein L22, putative	2426	2.67	3.07	2.79	-2.04	4.39	3.3	1.69
PF14_0231	60S ribosomal protein L7-3, putative	5669	2.85	3.08	2.87	-2.04	4.54	3.27	1.85
PFD1055w	40S ribosomal protein S19, putative	1001	2.67	3.08	2.76	-2.04	4.14	3.28	1.07
PFF0700c	60S ribosomal protein L19, putative	1567	2.61	3.05	2.81	-2.04	4.27	3.23	1.35
PF11_0437	60S ribosomal protein L28, putative	3914	2.73	3.08	2.72	-2.04	4.24	3.32	1.27
PFC0200w-b	60S ribosomal protein L44, putative	519	2.6	3.07	2.77	-2.04	4.02	3.31	1.02
PF13_0228	40S ribosomal protein S6, putative	5074	2.77	3.1	2.83	-2.04	4.03	3.35	1.04
PF14_0296	60S ribosomal protein L14, putative	5746	2.8	3.11	2.84	-2.04	4.21	3.28	1.16
PF13_0014	40S ribosomal protein S7, putative	4663	2.81	3.11	2.79	-2.04	4.32	3.34	1.36
PF14_0240	60S ribosomal protein L21e, putative	5683	2.49	3.08	2.67	-2.04	3.94	3.28	0.93
PF11_0065	40S ribosomal protein S4, putative	3512	2.9	3.13	2.94	-2.04	4.21	3.36	1.15
MAL13P1.209	60S ribosomal protein L18-2, putative	5068	2.68	3.1	2.92	-2.04	4.34	3.28	1.41
PF13_0132	60S ribosomal protein L23a, putative	4879	2.66	3.11	2.87	-2.04	3.88	3.32	0.8
PF10_0272	60S ribosomal protein L3, putative	3294	2.93	3.14	2.97	-2.04	4.4	3.38	1.46
PFC0535w	60S ribosomal protein L26, putative	612	2.63	3.1	2.79	-2.04	4.07	3.31	1.03
PF11_0260	60S ribosomal protein L35, putative	3724	2.95	3.14	2.86	-2.04	5.33	3.34	3.56
PFF0885w	60S ribosomal protein L27a, putative	1613	2.68	3.14	2.89	-2.04	4.45	3.32	1.53
PF07_0079	60S ribosomal protein L11a, putative	2018	2.61	3.14	2.82	-2.04	4.04	3.33	0.95
PF14_0585	40S ribosomal protein S28e, putative	6065	2.71	3.12	2.93	-2.04	4.47	3.34	1.57
PFB0830w	40S ribosomal protein S26e, putative	392	2.94	3.15	2.95	-2.04	4.7	3.39	2.22
PF14_0083	40S ribosomal protein S8e, putative	5505	2.83	3.17	2.97	-2.04	4.06	3.33	0.84
PF14_0230	60S ribosomal protein L5, putative	5668	2.97	3.17	2.97	-2.04	4.54	3.36	1.66
PFF0573c	60S ribosomal protein L39, putative	1532	2.64	3.16	2.87	-2.04	4.52	3.41	1.61
PF13_0049	60S ribosomal protein L24, putative	4730	3.01	3.21	3.01	-2.04	4.62	3.45	1.77
PFC0300c	60S ribosomal protein L7, putative	548	2.8	3.19	2.93	-2.04	4.13	3.36	0.96
PF13_0129	60S ribosomal protein L6, putative	4876	2.76	3.21	2.93	-2.04	4.11	3.39	1.08
PF13_0346	60S ribosomal protein L40/UBI, putative	5322	2.91	3.22	3.03	-2.04	4.89	3.37	2.57
PFC1020c	40S ribosomal protein S3A, putative	725	2.91	3.22	3.05	-2.04	3.88	3.36	0.63
PF10_0043	60S ribosomal protein L13, putative	3034	2.8	3.23	2.96	-2.04	3.93	3.38	0.74
PFB0885w	40S ribosomal protein S30, putative	405	2.75	3.22	3.02	-2.04	5.05	3.38	3.54
PF14_0627	40S ribosomal protein S3, putative	6114	2.96	3.26	3.04	-2.04	4.51	3.45	1.68
PF13_0224	60S ribosomal protein L18, putative	5067	2.97	3.26	3.03	-2.04	3.92	3.41	0.74
PFC0735w	40S ribosomal protein S15A, putative	659	2.93	3.27	3.06	-2.04	4.62	3.4	1.64
PF10_0038	40S ribosomal protein S20e, putative	3029	2.87	3.28	3.04	-2.04	4.43	3.42	1.38
PF13_0213	60S ribosomal protein L6-2, putative	5035	2.85	3.27	2.94	-2.04	4.95	3.46	2.88
MAL7P1.300	40S ribosomal protein S29, putative	1863	2.82	3.28	3.02	-2.04	4.81	3.45	2.19
PFC0775w	40S ribosomal protein S11, putative	670	3.05	3.3	3.11	-2.04	5.23	3.49	3.77
PF14_0205	40S ribosomal protein S25, putative	5642	2.86	3.3	3.07	-2.04	4.62	3.48	1.78
PF08_0075	60S ribosomal protein L13-2, putative	2340	3.06	3.29	3.09	-2.04	4.33	3.5	1.04
PF13_0045	40S ribosomal protein S27, putative	4721	2.99	3.31	3.12	-2.04	4.66	3.48	1.66
PF08_0076	40S ribosomal protein S16, putative	2339	2.98	3.31	3.15	-2.04	4.36	3.51	1.18
PFE0350c	60S ribosomal protein L4, putative	1121	3.17	3.32	3.07	-2.04	4.26	3.62	1.07
PFL2055w	40S ribosomal protein S17, putative	4484	2.93	3.32	3.11	-2.04	4.65	3.52	1.81
PFC0295c	40S ribosomal protein S12, putative	547	3.13	3.35	3.15	-2.04	4.85	3.56	2.03
PF14_0579	60S ribosomal protein L27, putative	6058	3.12	3.35	3.21	-2.04	4.37	3.54	1.11
PF13_0268	60S ribosomal protein L17, putative	5171	3.04	3.36	3.07	-2.04	4.21	3.49	0.88
PF11_0043	60S ribosomal protein P1, putative	3486	3.26	3.36	3.12	-2.04	5.29	3.62	2.97
PFC0290w	40S ribosomal protein S23, putative	545	3.01	3.35	3.08	-2.04	4.3	3.47	1.09
PF07_0043	60S ribosomal protein L34a, putative	1913	3.11	3.38	3.17	-2.04	4.27	3.56	0.98
PFI0190w	60S ribosomal protein L32, putative	2607	2.99	3.37	3.12	-2.04	4.25	3.62	0.88
PFE0810c	40S ribosomal protein S14, putative	1221	3.04	3.4	3.15	-2.04	4.6	3.55	1.67
PFE0975c	40S ribosomal protein S24, putative	1257	3.08	3.43	3.16	-2.04	4.48	3.58	1.32
PFE1005w	40S ribosomal protein S9, putative	1264	2.99	3.42	3.21	-2.04	4.26	3.56	0.83
PF07_0088	40S ribosomal protein S5, putative	2041	3.28	3.47	3.27	-2.04	4.35	3.7	0.89
PFB0455w-b	60S ribosomal protein L37ae, putative	309	3.12	3.44	3.22	-2.04	5.01	3.66	2.26
PF11_0438	60S ribosomal protein L35ae, putative	3915	3.15	3.48	3.22	-2.04	4.67	3.67	1.26
PFE0850c	60S ribosomal protein L12, putative	1230	3.34	3.5	3.29	-2.04	4.7	3.66	1.52
PF13_0171	60S ribosomal protein L23, putative	4969	3.24	3.5	3.35	-2.04	4.79	3.69	1.55
PF11_0272	40S ribosomal protein S18, putative	3738	3.14	3.48	3.3	-2.04	4.46	3.63	0.92
MAL13P1.92	40S ribosomal protein S15/S19, putative	4821	3.12	3.51	3.24	-2.04	4.25	3.67	0.8
PFB0455w-a	60S ribosomal protein L37ae, putative	308	3.15	3.53	3.31	-2.04	5.27	3.75	2.75
PF13_0316	40S ribosomal protein S13, putative	5245	3.22	3.52	3.24	-2.04	4.63	3.79	1.26
PFD0770c	60S ribosomal protein L15, putative	931	3.38	3.54	3.36	-2.04	4.66	3.73	1.28
PF11_0454	40S ribosomal protein S21e, putative	3931	3.04	3.52	3.19	-2.04	4.53	3.71	1.19
PF14_0448	40S ribosomal protein S2, putative	5911	3.45	3.55	3.4	-2.04	4.56	3.73	1.01
PFE0845c	60S ribosomal protein L8, putative	1229	3.47	3.57	3.43	-2.04	5.3	3.82	2.47
PF11_0313	60S ribosomal protein P0	3781	3.36	3.59	3.36	-2.04	4.66	3.81	1.11
PF10_0264	40S ribosomal protein S2B, putative	3283	3.43	3.6	3.41	-2.04	4.5	3.76	0.95
PF07_0080	40S ribosomal protein S10, putative	2019	3.3	3.61	3.45	-2.04	4.37	3.78	0.79

## Sheet: Hs_cytokine
symbol	definition	mean	median	lower	min	max	upper	stdev
NM_138805	family with sequence similarity 3, member D	-1.53	-2.04	-2.04	-2.04	0.06	-0.99	1.96
NM_002176	interferon beta precursor	-1.82	-2.04	-2.04	-2.04	0.25	-2.04	3.72
NM_006664	C-C motif chemokine 27 precursor	-1.5	-2.04	-2.04	-2.04	0.49	-0.81	2.83
NM_033439	interleukin-33 precursor	-1.92	-2.04	-2.04	-2.04	0.14	-2.04	6.21
NM_021073	bone morphogenetic protein 5 preproprotein	-1.97	-2.04	-2.04	-2.04	0.11	-2.04	7.47
NM_016204	growth/differentiation factor 2 precursor	-1.95	-2.04	-2.04	-2.04	0.72	-2.04	9.24
NM_032963	C-C motif chemokine 14 isoform 1 precursor	-1.68	-2.04	-2.04	-2.04	1.12	-2.04	6.15
NM_002981	C-C motif chemokine 1 precursor	-1.68	-2.04	-2.04	-2.04	0.1	-2.04	2.44
NM_000609	stromal cell-derived factor 1 isoform beta	-1.72	-2.04	-2.04	-2.04	0.16	-1.51	3.14
NM_172219	granulocyte colony-stimulating factor isoform b	-1.2	-2.04	-2.04	-2.04	1.97	-0.69	3.88
NM_005623	C-C motif chemokine 8 precursor	-1.45	-2.04	-2.04	-2.04	0.98	-0.88	4.09
NM_006273	C-C motif chemokine 7 precursor	-1.49	-2.04	-2.04	-2.04	0.55	-0.91	2.67
NM_020525	interleukin-22 precursor	-1.81	-2.04	-2.04	-2.04	0.23	-2.04	4.07
NM_018402	interleukin-26 precursor	-1.64	-2.04	-2.04	-2.04	0.32	-1.21	3.14
NM_002192	inhibin beta A chain precursor	-1.59	-2.04	-2.04	-2.04	0.62	-1.21	3.99
NM_002991	C-C motif chemokine 24 precursor	-1.46	-2.04	-2.04	-2.04	0.45	-0.65	2.2
NM_006072	C-C motif chemokine 26 precursor	-1.5	-2.04	-2.04	-2.04	0.34	-0.81	2.22
NM_004887	C-X-C motif chemokine 14 precursor	-1.72	-2.04	-2.04	-2.04	0.18	-1.51	3.56
NM_000879	interleukin-5 precursor	-1.94	-2.04	-2.04	-2.04	0.3	-2.04	7.81
NM_153758	interleukin-19 isoform 1 precursor	-1.7	-2.04	-2.04	-2.04	0.28	-1.39	3.87
NM_033035	thymic stromal lymphopoietin	-1.75	-2.04	-2.04	-2.04	0.07	-1.51	3.54
NM_019618	interleukin-1 family member 9	-1.87	-2.04	-2.04	-2.04	0.47	-2.04	5.47
NM_130851	bone morphogenetic protein 4 preproprotein	-1.87	-2.04	-2.04	-2.04	0.15	-2.04	5.46
NM_033012	tumor necrosis factor ligand superfamily member	-1.68	-2.04	-2.04	-2.04	0.49	-1.39	4.06
NM_001159740	lymphotoxin-alpha precursor	-1.49	-1.69	-2.04	-2.04	0.12	-0.99	2.14
NM_001492	embryonic growth/differentiation factor 1	-1.56	-1.69	-2.04	-2.04	0.07	-1.14	2.22
NM_000575	interleukin-1 alpha proprotein	-1.26	-1.69	-2.04	-2.04	1.6	-0.99	3.52
NM_006419	C-X-C motif chemokine 13 precursor	-1.42	-1.69	-2.04	-2.04	0.26	-0.91	2.23
NM_002188	interleukin-13 precursor	-1.39	-1.39	-2.04	-2.04	0.23	-0.88	1.88
NM_058186	family with sequence similarity 3, member B	-1.15	-1.29	-2.04	-2.04	1.09	-0.45	2.83
NM_000589	interleukin-4 isoform 1 precursor	-1.23	-1.21	-2.04	-2.04	0.41	-0.61	1.75
NM_002993	C-X-C motif chemokine 6	-1.26	-1.21	-2.04	-2.04	0.51	-0.67	2.14
NM_002006	heparin-binding growth factor 2	-1.24	-1.21	-1.69	-2.04	0.07	-0.88	1.47
NM_000594	tumor necrosis factor	-1.19	-1.14	-2.04	-2.04	1	-0.71	3.53
NM_002988	C-C motif chemokine 18 precursor	-1.13	-1.14	-2.04	-2.04	0.93	-0.4	2.48
NM_005260	growth/differentiation factor 9 preproprotein	-1.18	-1.09	-1.69	-2.04	0.45	-0.81	2.05
NM_052863	secretoglobin family 3A member 1 precursor	-1.22	-1.09	-2.04	-2.04	1.01	-0.43	3.31
NM_005409	C-X-C motif chemokine 11 precursor	-1	-0.95	-2.04	-2.04	1.03	-0.3	2.5
NM_000582	osteopontin isoform b precursor	-0.97	-0.95	-1.51	-2.04	0.41	-0.47	1.54
NM_001200	bone morphogenetic protein 2 preproprotein	-0.99	-0.91	-1.39	-2.04	0.55	-0.48	1.67
NM_003175	cytokine SCM-1 beta precursor	-1.11	-0.91	-2.04	-2.04	0.89	-0.33	2.46
NM_172140	interleukin-29 precursor	-1.02	-0.88	-2.04	-2.04	0.35	-0.45	1.36
NM_002309	leukemia inhibitory factor precursor	-0.89	-0.88	-1.29	-2.04	0.3	-0.58	1.46
NM_005450	noggin precursor	-0.92	-0.84	-1.51	-2.04	1.03	-0.39	2.55
NM_005430	proto-oncogene Wnt-1 precursor	-0.92	-0.84	-1.21	-2.04	0.25	-0.54	1.15
NM_002995	lymphotactin	-1	-0.84	-2.04	-2.04	0.62	-0.4	1.81
NM_006274	C-C motif chemokine 19 precursor	-0.98	-0.81	-2.04	-2.04	1.15	-0.35	2.68
NM_002193	inhibin beta B chain preproprotein	-1	-0.81	-1.51	-2.04	0.28	-0.59	1.32
NM_001130046	C-C motif chemokine 20 isoform 2	-0.7	-0.81	-2.04	-2.04	2.56	-0.02	3.47
NM_001040020	family with sequence similarity 3, member C	-0.96	-0.79	-1.39	-2.04	0.3	-0.48	1.24
NM_021803	interleukin-21	-1	-0.79	-2.04	-2.04	0.57	-0.21	1.54
NM_031909	complement C1q tumor necrosis factor-related	-0.91	-0.76	-1.39	-2.04	0.36	-0.4	1.32
NM_004625	protein Wnt-7a precursor	-0.92	-0.73	-1.69	-2.04	0.91	-0.39	2.3
NM_001142544	cardiotrophin-1 isoform 2	-0.85	-0.73	-1.14	-2.04	0.16	-0.43	1.01
NM_003873	neuropilin-1 isoform a	-0.8	-0.73	-1.04	-2.04	0.36	-0.45	1.21
NM_018055	nodal homolog precursor	-0.85	-0.73	-1.14	-2.04	0.31	-0.36	1.17
NM_013278	interleukin-17C precursor	-0.9	-0.65	-1.51	-2.04	0.72	-0.34	1.68
NM_013962	pro-neuregulin-1, membrane-bound isoform isoform	-0.78	-0.65	-1.14	-2.04	0.22	-0.26	1.12
NM_001720	bone morphogenetic protein 8B preproprotein	-0.71	-0.63	-0.95	-2.04	0.22	-0.43	1.05
NM_005624	C-C motif chemokine 25 precursor	-0.77	-0.59	-1.21	-2.04	0.6	-0.23	1.44
NM_003326	tumor necrosis factor ligand superfamily member	-0.64	-0.56	-0.95	-2.04	0.43	-0.2	1.12
NM_002090	C-X-C motif chemokine 3	-0.45	-0.53	-0.88	-2.04	2.09	-0.1	3.43
NM_000880	interleukin-7 precursor	-0.53	-0.51	-0.84	-2.04	1.13	-0.2	2.19
NM_002994	C-X-C motif chemokine 5 precursor	-0.63	-0.5	-0.99	-2.04	0.69	-0.18	1.56
NM_181809	bone morphogenetic protein 8A precursor	-0.53	-0.48	-0.69	-2.04	0.26	-0.27	0.79
NM_181521	CKLF-like MARVEL transmembrane domain-containing	-0.48	-0.47	-0.73	-2.04	0.67	-0.28	1.14
NM_003811	tumor necrosis factor ligand superfamily member	-0.5	-0.47	-0.81	-2.04	1.14	-0.09	1.85
NM_000600	interleukin-6 precursor	-0.42	-0.46	-1.09	-2.04	2.51	0.08	3.71
NM_148672	C-C motif chemokine 28 precursor	-0.69	-0.43	-1.04	-2.04	0.54	-0.16	1.24
NM_145898	C-C motif chemokine 23 isoform CKbeta8	-0.71	-0.43	-2.04	-2.04	0.79	0	1.48
NM_002089	C-X-C motif chemokine 2	-0.26	-0.35	-0.84	-2.04	2.4	0.26	3.17
NM_001735	complement C5 preproprotein	-0.26	-0.27	-0.54	-1.99	1.53	-0.02	2.9
NM_001168319	endothelin-1 isoform 2 preproprotein	-0.24	-0.2	-0.65	-2.04	1.52	0.13	2.39
NM_018271	threonine synthase-like 2	-0.34	-0.2	-0.51	-2.04	0.75	0.02	0.97
NM_178868	CKLF-like MARVEL transmembrane domain-containing	-0.22	-0.14	-0.38	-2.04	0.67	0.09	0.92
NM_004864	growth/differentiation factor 15	-0.2	-0.14	-0.51	-2.04	1.4	0.19	2.13
NM_002982	C-C motif chemokine 2 precursor	-0.18	-0.08	-0.54	-2.04	1.98	0.39	2.99
NM_000639	tumor necrosis factor ligand superfamily member	-0.16	-0.07	-0.45	-2.04	1.15	0.28	1.42
NM_006129	bone morphogenetic protein 1 isoform 3	-0.07	0	-0.29	-2.04	0.64	0.15	0.71
NM_002416	C-X-C motif chemokine 9 precursor	-0.08	0.04	-0.33	-2.04	1.21	0.37	1.24
NM_005811	growth/differentiation factor 11 precursor	0.03	0.07	-0.15	-2.04	0.77	0.26	0.67
NM_002620	platelet factor 4 variant	-0.02	0.12	-0.45	-2.04	1.43	0.48	1.58
NM_000074	CD40 ligand	0.2	0.22	-0.04	-1.99	1.23	0.54	1.03
NM_001166212	cardiotrophin-like cytokine factor 1 isoform 2	0.17	0.23	-0.1	-2.04	1.49	0.5	1.37
NM_000572	interleukin-10 precursor	0.18	0.23	-0.05	-2.04	1.4	0.55	1.32
NM_001252	CD70 antigen	0.12	0.24	-0.04	-2.04	1.01	0.43	0.82
NM_001171627	vascular endothelial growth factor A isoform m	0.35	0.3	0.05	-0.71	1.86	0.71	1.79
NM_016584	interleukin-23 subunit alpha precursor	0.42	0.39	0.15	-2.04	2.84	0.6	5.09
NM_181296	CKLF-like MARVEL transmembrane domain-containing	0.36	0.39	0.15	-2.04	1.3	0.63	0.99
NM_172210	macrophage colony-stimulating factor 1 isoform b	0.29	0.41	-0.05	-2.04	1.38	0.68	1.15
NM_001562	interleukin-18 proprotein	0.42	0.44	0.18	-2.04	1.43	0.66	1.15
NM_003807	tumor necrosis factor ligand superfamily member	0.42	0.45	0.19	-2.04	1.68	0.77	1.33
NM_172174	interleukin-15 preproprotein	0.5	0.53	0.27	-0.79	1.36	0.79	0.89
NM_005755	interleukin-27 subunit beta precursor	0.55	0.62	0.3	-2.04	1.53	0.86	1.05
NM_002128	high mobility group protein B1	0.58	0.62	0.39	-0.81	1.68	0.89	1.13
NM_000619	interferon gamma precursor	0.5	0.63	0.27	-2.04	1.89	0.88	1.43
NM_001244	tumor necrosis factor ligand superfamily member	0.57	0.66	0.36	-1.69	1.52	0.88	0.91
NM_001565	C-X-C motif chemokine 10 precursor	0.6	0.69	0.05	-2.04	2.71	1.2	2.65
NM_001511	growth-regulated alpha protein precursor	0.67	0.69	0.35	-2.04	2.39	1.09	2.41
NM_001185157	interleukin-24 isoform 4 precursor	0.66	0.72	0.35	-1.51	1.63	0.99	1.03
NM_145659	interleukin-27 subunit alpha precursor	0.78	0.76	0.55	0.02	2.09	0.96	1.51
NM_001718	bone morphogenetic protein 6 preproprotein	0.83	0.84	0.55	-0.67	2.54	1.1	2.44
NM_001142415	aminoacyl tRNA synthase complex-interacting	0.79	0.84	0.59	-0.02	1.45	1.02	0.68
NM_175852	alpha-taxilin	0.88	0.89	0.72	0.05	1.51	1.08	0.65
NM_002983	C-C motif chemokine 3 precursor	1.09	0.92	0.66	-0.37	3.06	1.36	2.62
NM_020530	oncostatin-M precursor	0.99	1.02	0.63	-1.21	2.41	1.3	1.85
NM_138460	CKLF-like MARVEL transmembrane domain-containing	1.03	1.03	0.82	-2.04	2.34	1.24	1.52
NM_001172128	pro-interleukin-16 isoform 3	1.09	1.06	0.92	0.16	1.93	1.34	0.85
NM_009588	lymphotoxin-beta isoform b	0.91	1.1	0.81	-2.04	1.97	1.3	0.9
NM_002984	C-C motif chemokine 4 isoform 1 precursor	1.29	1.26	0.88	-2.04	3.08	1.57	2.39
NM_003809	tumor necrosis factor ligand superfamily member	1.24	1.29	1.03	-0.1	1.85	1.53	0.66
NM_198481	V-set and transmembrane domain-containing	1.19	1.29	0.96	-0.31	2.07	1.44	0.83
NM_006573	tumor necrosis factor ligand superfamily member	1.42	1.41	1.12	0.14	2.71	1.74	1.5
NM_001459	SL cytokine precursor	1.46	1.43	1.25	0.22	2.24	1.68	0.84
NM_022059	C-X-C motif chemokine 16	1.42	1.49	1.23	0.45	2.23	1.63	0.78
NM_181472	CKLF-like MARVEL transmembrane domain-containing	1.47	1.51	1.29	0.18	2.14	1.67	0.62
NM_005746	nicotinamide phosphoribosyltransferase	1.51	1.56	1.25	0.02	2.95	1.75	1.61
NM_001184722	glucose-6-phosphate isomerase isoform 1	1.55	1.56	1.43	1.08	2.01	1.67	0.48
NM_001048251	CKLF-like MARVEL transmembrane domain-containing	1.52	1.57	1.35	0.71	1.98	1.72	0.54
NM_000576	interleukin-1 beta proprotein	1.63	1.59	1.06	0.28	3.99	1.94	3.52
NM_017801	CKLF-like MARVEL transmembrane domain-containing	1.55	1.59	1.29	0.05	2.65	1.84	1.15
NM_003808	tumor necrosis factor ligand superfamily member	1.57	1.62	1.39	0.51	2.09	1.8	0.62
NM_000584	interleukin-8 precursor	1.66	1.63	1.02	-1.39	3.94	2.39	2.86
NM_001190942	tumor necrosis factor ligand superfamily member	1.69	1.69	1.32	0.38	3.11	2.02	1.55
NM_144673	CKLF-like MARVEL transmembrane domain-containing	1.75	1.79	1.49	0.04	2.82	2.08	1.1
NM_002704	platelet basic protein preproprotein	1.87	1.83	1.54	0.67	3.07	2.19	1.29
NM_002619	platelet factor 4 precursor	1.9	1.88	1.57	0.83	3.2	2.21	1.54
NM_001040138	chemokine-like factor isoform e	2	2.03	1.78	0.96	2.79	2.26	0.92
NM_004221	interleukin-32 isoform B	2.09	2.15	1.85	0.27	2.86	2.37	0.82
NM_003004	secreted and transmembrane protein 1 precursor	2.29	2.31	2.07	1.55	3.15	2.5	0.84
NM_002415	macrophage migration inhibitory factor	2.31	2.31	2.16	1.36	2.9	2.51	0.56
NM_002985	C-C motif chemokine 5 precursor	2.33	2.33	2.06	1.01	3.35	2.54	0.98
NM_002087	granulins precursor	2.44	2.5	2.22	1.53	3.17	2.66	0.72

## Sheet: Hs_interleukin
symbol	definition	mean	median	lower	min	max	upper	stdev
NM_002187	interleukin-12 subunit beta precursor	-1.76	-2.04	-2.04	-2.04	0.24	-1.69	3.81
NM_000014	alpha-2-macroglobulin precursor	-1.24	-1.21	-1.69	-2.04	0.2	-0.84	1.59
NM_006470	tripartite motif-containing protein 16	-0.96	-0.81	-1.29	-2.04	0.15	-0.56	1.07
NM_016232	interleukin-1 receptor-like 1 isoform 1	-0.8	-0.73	-1.29	-2.04	0.52	-0.26	1.37
NM_144717	interleukin-20 receptor subunit beta precursor	-0.59	-0.5	-0.76	-2.04	0.29	-0.27	0.91
NM_000882	interleukin-12 subunit alpha precursor	-0.55	-0.4	-0.88	-2.04	0.88	-0.14	1.52
NM_000417	interleukin-2 receptor subunit alpha precursor	0.06	0.14	-0.2	-2.04	1.05	0.41	0.99
NM_001190981	interleukin-6 receptor subunit beta isoform 3	0.48	0.51	0.18	-1.21	1.47	0.82	0.94
NM_181359	interleukin-6 receptor subunit alpha isoform 2	0.74	0.76	0.5	-0.61	1.84	1.02	1.3
NM_001039660	interleukin-18-binding protein isoform a	0.84	0.87	0.67	-0.03	1.72	1.06	0.81
NM_000878	interleukin-2 receptor subunit beta precursor	1.17	1.17	0.9	-1.09	2.34	1.48	1.17
NM_005535	interleukin-12 receptor subunit beta-1 isoform 1	1.2	1.26	0.99	-0.2	1.73	1.43	0.64
NM_001168298	C-X-C chemokine receptor type 2	1.28	1.41	0.91	-2.04	2.56	1.77	1.37
NM_001018837	HCLS1-associated protein X-1 isoform b	1.48	1.51	1.32	0.27	2.34	1.7	0.76
NM_000634	C-X-C chemokine receptor type 1	1.88	1.93	1.57	-0.46	3.18	2.21	1.34
NM_000206	cytokine receptor common subunit gamma	2.35	2.36	2.19	1.41	3.04	2.6	0.73

## Sheet: Hs_ribosomal
symbol	definition	group_id	mean	median	lower	min	max	upper	stdev
NM_000987	60S ribosomal protein L26	16957	-0.34	-0.14	-0.56	-2.04	0.87	0.11	1.14
NM_000971	60S ribosomal protein L7	8584	-0.75	-0.56	-1.14	-2.04	0.34	-0.23	1.12
NM_001011	40S ribosomal protein S7	7222	0.06	0.16	0.05	-2.04	0.82	0.35	0.71
NM_001024662	60S ribosomal protein L6	18064	0.06	0.14	-0.03	-2.04	0.74	0.37	0.69
NM_000976	60S ribosomal protein L12	13238	0.22	0.26	0.1	-2.04	1.1	0.46	0.77
NM_001029	40S ribosomal protein S26	18512	0.14	0.29	0.03	-2.04	1.15	0.49	0.85
NM_001031	40S ribosomal protein S28	5925	0.12	0.19	-0.07	-2.04	1.2	0.47	1.04
NM_001018	40S ribosomal protein S15	6163	0.22	0.33	0.13	-2.04	1.26	0.5	0.85
NM_000982	60S ribosomal protein L21	9984	0.26	0.35	0.09	-2.04	1.25	0.59	0.93
NM_001000	60S ribosomal protein L39	14395	0.91	0.88	0.49	-2.04	2.41	1.36	1.76
NM_001030	40S ribosomal protein S27	4078	0.96	0.94	0.71	0.1	1.87	1.24	1.04
NM_000661	60S ribosomal protein L9	7748	0.97	0.99	0.82	-0.02	1.8	1.16	0.71
NM_006013	60S ribosomal protein L10	14694	1.03	1	0.88	0.47	1.56	1.18	0.5
NM_001035006	60S ribosomal protein L17	6370	1.04	1.05	0.89	0.16	1.86	1.25	0.74
NM_002952	40S ribosomal protein S2	12408	1.1	1.07	0.8	0.16	1.97	1.43	0.94
NM_000995	60S ribosomal protein L34	8399	1.1	1.11	0.87	-0.1	1.96	1.31	0.97
NM_001014	40S ribosomal protein S10	15147	1.14	1.18	0.9	-0.11	2.12	1.43	1.08
NM_001007073	60S ribosomal protein L32	10399	1.36	1.31	1.15	0.36	2.32	1.56	1.06
NM_021104	60S ribosomal protein L41	18674	1.54	1.47	1.3	0.88	2.69	1.73	1.46
NM_000986	60S ribosomal protein L24	10401	1.54	1.52	1.37	0.62	2.31	1.73	0.82
NM_000992	60S ribosomal protein L29	10250	1.54	1.55	1.33	0.38	2.55	1.76	0.96
NM_003973	60S ribosomal protein L14	10591	1.67	1.65	1.49	0.61	2.37	1.83	0.73
NM_002948	60S ribosomal protein L15	10859	1.68	1.69	1.48	0.64	2.45	1.93	0.75
NM_000969	60S ribosomal protein L5	4238	1.7	1.71	1.52	0.65	2.54	1.89	0.86
NM_001025	40S ribosomal protein S23	60	1.76	1.78	1.58	0.66	2.57	1.94	0.82
NM_000981	60S ribosomal protein L19	17406	1.82	1.8	1.65	0.76	2.55	2	0.71
NM_000968	60S ribosomal protein L4	14063	1.8	1.8	1.6	0.67	2.63	1.97	0.84
NM_000997	60S ribosomal protein L37	222	1.93	1.9	1.67	0.95	2.89	2.13	1.01
NM_001017	40S ribosomal protein S13	11295	2.03	2.01	1.84	1.02	2.91	2.22	0.91
NM_000977	60S ribosomal protein L13	12704	2.04	2.03	1.87	0.96	2.75	2.23	0.73
NM_001012	40S ribosomal protein S8	4347	2.14	2.11	1.97	1.08	3	2.3	0.8
NM_001028	40S ribosomal protein S25	11505	2.17	2.15	1.95	1.23	3.12	2.38	0.98
NM_007209	60S ribosomal protein L35	13368	2.28	2.27	2.08	1.14	3.09	2.49	0.8
NM_001005	40S ribosomal protein S3	11672	2.29	2.29	2.11	1.12	2.98	2.47	0.71
NM_001009	40S ribosomal protein S5	6204	2.34	2.31	2.16	1.26	3.16	2.53	0.83
NM_005617	40S ribosomal protein S14	31	2.37	2.32	2.19	1.29	3.36	2.54	1.09
NM_001016	40S ribosomal protein S12	16057	2.4	2.35	2.17	1.51	3.67	2.58	1.52
NM_033643	60S ribosomal protein L36	5848	2.4	2.37	2.2	1.35	3.15	2.57	0.76
NM_001013	40S ribosomal protein S9	6232	2.38	2.37	2.23	1.81	2.96	2.53	0.6
NM_001022	40S ribosomal protein S19	6028	2.44	2.43	2.29	1.22	3.04	2.59	0.65
NM_000978	60S ribosomal protein L23	16799	2.43	2.44	2.25	1.37	3.23	2.6	0.89
NM_001024	40S ribosomal protein S21	16314	2.53	2.49	2.31	1.4	3.37	2.73	0.84
NM_001035258	60S ribosomal protein L38	17361	2.57	2.53	2.36	1.72	3.37	2.76	0.89
NM_001010	40S ribosomal protein S6	13075	2.56	2.56	2.39	1.46	3.37	2.75	0.8
NM_000988	60S ribosomal protein L27	17659	2.66	2.63	2.48	1.62	3.54	2.85	0.87
NM_001020	40S ribosomal protein S16	5285	2.73	2.72	2.56	1.8	3.34	2.89	0.66
NM_000979	60S ribosomal protein L18	5455	2.73	2.72	2.55	1.7	3.36	2.89	0.65
NM_033301	60S ribosomal protein L8	8586	2.86	2.84	2.67	2.07	3.55	3.03	0.7
NM_000989	60S ribosomal protein L30	8689	2.95	2.91	2.75	2.02	3.88	3.15	0.96
NM_000975	60S ribosomal protein L11	4293	3.01	3.02	2.83	1.99	3.9	3.2	0.92
NM_001015	40S ribosomal protein S11	6170	3.15	3.07	2.93	2.23	4.17	3.34	1.09
