# Supplementary material for: Interactive transcriptome analysis of malaria patients and infectingPlasmodium falciparum
Source: HighWire-hosted journal article supplement (doi:10.1101/gr.158980.113), 2014-08-04
Supplement: Supplemental_Table_10.xlsx [file Supplemental_Table_10.xlsx]

## Sheet: (A)chloroquine resistance
Symbol	Chromosome	Strand	mRNA length	Definition
MAL7P1.27	Pf3D7_07	+	1275	chloroquine resistance transporter
Genomic_position	Reference genome	Position	SNP	Codon change	Amino acid change	known (1) or novel (0)	No. of patients observed	Patient ID
458990	T	214	A	Tgt/Agt	C/S	1	17	39,43,46,47,50,54,56,58,64,76,93,96,97,101,109,112,116
458991	G	215	C	tGt/tCt	C/S	1	2	40,41
459003	A	227	C	aAa/aCa	K/T	1	28	39,40,41,43,44,45,46,48,50,54,55,56,58,63,64,65,66,69,73,76,81,93,96,97,101,105,109,116
459385	G	430	A	Gcc/Acc	A/T	1	6	4,24,33,37,40,41
459451	A	496	G	Att/Gtt	I/V	0	1	41
459785	G	658	T	Gcc/Tcc	A/S	1	19	39,43,44,46,54,58,63,64,66,76,81,84,93,96,97,105,110,112,116
460739	A	976	G	Aac/Gac	N/D	1	74	4,5,6,16,18,19,20,24,25,26,27,30,33,34,36,37,39,40,41,43,44,45,46,47,48,49,50,54,55,56,58,60,63,64,65,66,67,69,71,73,74,75,76,77,78,80,81,82,84,85,86,88,90,91,92,93,95,96,97,98,100,101,102,105,106,107,108,109,110,112,115,116,117,118
460761	C	998	G	aCc/aGc	T/S	1	23	43,46,54,58,64,65,66,67,69,81,82,86,93,96,97,100,102,105,107,109,112,116,118
460977	A	1066	T	Ata/Tta	I/L	1	69	5,6,8,16,18,19,20,25,26,27,28,29,30,31,34,36,39,43,44,45,46,47,48,49,50,54,55,56,58,63,64,65,66,67,69,71,73,74,76,77,78,81,82,84,85,86,87,88,90,91,92,93,96,97,100,101,102,105,106,107,108,109,110,112,115,116,117,118,119

## Sheet: (B)multidrug resistance
Symbol	Chromosome	Strand	mRNA length	Definition
PFE1150w	Pf3D7_05	+	4260	multidrug resistance protein
Genomic_position	Reference genome	Position	SNP	Codon change	Amino acid change	known (1) or novel (0)	No. of patients observed	Patient ID
958140	A	256	T	Aat/Tat	N/Y	1	6	43,54,93,96,97,112
960764	G	2880	GA	*	*	0	1	97
960942	C	3058	CA	*	*	0	4	39,43,96,97
961008	A	3124	G	Aat/Gat	N/D	1	4	20,34,55,108

## Sheet: (C)calcium-transporting
Symbol	Chromosome	Strand	mRNA length	Definition
PFA0310c	Pf3D7_01	-	3687	calcium-transporting ATPase
Genomic_position	Reference genome	Position	SNP	Codon change	Amino acid change	known (1) or novel (0)	No. of patients observed	Patient ID
266177	G	3093	T	tgC/tgA	C/*	1	3	44,55,56
