# Supplementary material for: Interactive transcriptome analysis of malaria patients and infectingPlasmodium falciparum
Source: HighWire-hosted journal article supplement (doi:10.1101/gr.158980.113), 2014-08-04
Supplement: Supplemental_Table_11.xlsx [file Supplemental_Table_11.xlsx]

## Sheet: Patients
Patient_ID	Patient_Name	%Pf_tags	Age	Temparature	Sex	Infection Date	From
4	malaria1#01	5.147	NA	NA	NA	NA	Manado
5	malaria2#01	5.649	NA	NA	NA	NA	Manado
6	malaria2#04	2.828	NA	NA	NA	NA	Manado
7	malaria3#05	0	NA	NA	NA	NA	Manado
8	malaria3#07	1.013	NA	NA	NA	NA	Manado
9	malaria3#06	0.293	NA	NA	NA	NA	Manado
11	malaria5#02	0.608	27	39	M	4	Manado
12	malaria5#04	0.055	36	38.3	M	3	Manado
13	malaria5#06	0.001	3	37.7	F	11	Manado
14	malaria5#07	3.299	3	37	F	3	Manado
15	malaria5#08	0.499	27	37.4	M	NA	Manado
16	malaria5#1	6.17	13	38.2	M	14	Bitung
17	malaria5#2	0.222	11	NA	F	3	Bitung
18	malaria5#3	4.954	39	39	M	4	Bitung
19	malaria5#5	1.272	10	38	F	4.5	Bitung
20	malaria5#6	1.45	21	39	M	2.5	Bitung
21	malaria5#10	0.001	4	37	M	7	Bitung
22	malaria5#11	0.012	26	38	M	7	Bitung
23	malaria5#13	0.191	24	38	F	3	Bitung
24	malaria5#34	2.104	8	39	M	7	Bitung
25	malaria5#39	6.37	46	39	F	3	Bitung
26	malaria5#40	3.239	56	37	M	3	Bitung
27	malaria5#41	2.965	34	38	F	7	Bitung
28	malaria5#43	0.828	42	NA	F	NA	Bitung
29	malaria5#44	0.149	36	NA	M	NA	Bitung
30	malaria5#46	4.961	5	39	M	7	Bitung
31	malaria5#47	2.399	2.7	38	M	3	Bitung
32	malaria5#49	0.014	8	NA	F	NA	Bitung
33	malaria5#03	4.7	9	38	M	2	Manado
34	malaria5#09	3.248	9	37.8	F	3	Manado
36	malaria5#4	12.933	7	36	M	4	Bitung
37	malaria5#8	33.417	22	36.7	F	7	Bitung
38	malaria6#01	0.409	41	38.3	F	2	Manado
39	malaria6#02	58.147	2.7	37.8	M	7	Manado
40	malaria6#03	16.611	2.7	NA	M	NA	Manado
41	malaria6#04	19.732	20	39.5	F	2	Manado
42	malaria6#07	0.073	11	37.4	F	1	Manado
43	malaria6#08	45.23	5.5	38.5	M	2	Manado
44	malaria6#53	8.222	34	NA	F	7	Bitung
45	malaria6#58	13.162	32	NA	M	NA	Bitung
46	malaria6#59	7.279	19	NA	F	NA	Bitung
47	malaria6#64	4.75	54	NA	F	NA	Bitung
48	malaria6#65	8.861	4	39	M	7	Bitung
49	malaria6#66	3.364	40	38	F	4	Bitung
50	malaria6#67	7.542	6	39.6	M	4	Bitung
51	malaria6#70	0.323	30	41	M	15	Bitung
52	malaria6#71	0.003	30	39	M	4	Bitung
53	malaria7#013	0.645	63	38.1	M	2	Manado
54	malaria7#33	54.242	8	40	F	NA	Bitung
55	malaria7#35	3.792	62	38	M	NA	Bitung
56	malaria7#47	2.693	14	38	F	NA	Bitung
57	malaria7#48	0.041	16	38	F	NA	Bitung
58	malaria7#55	22.062	23	39	M	NA	Bitung
59	malaria7#57	0.801	44	40	M	NA	Bitung
60	malaria7#58	13.453	39	38	F	NA	Bitung
61	malaria7#7	1.241	13	38	F	NA	Bitung
62	malaria7#011	0.208	5.17	38.2	F	2	Manado
63	malaria7#012	18.134	58	37.8	M	4	Manado
64	malaria7#18	16.995	6	40	F	NA	Bitung
65	malaria7#23	15.544	36	38	F	NA	Bitung
66	malaria7#26	25.183	38	41	F	NA	Bitung
67	malaria7#31	6.838	29	39	F	NA	Bitung
68	malaria7#32	0.156	49	39	M	NA	Bitung
69	malaria7#34	7.447	44	38	M	NA	Bitung
70	malaria6#74	0.03	42	NA	M	NA	Bitung
71	malaria6#76	2.614	7	38	M	3	Bitung
72	malaria6#77	0.047	42	39	F	3	Bitung
73	malaria6#78	13.844	13	37	M	4	Bitung
74	malaria6#79	1.189	18	NA	M	NA	Bitung
75	malaria6#80	0.881	15	NA	M	NA	Bitung
76	malaria6#81	19.195	55	38	F	7	Bitung
77	malaria6#83	2.183	20	37	M	6	Bitung
78	malaria6#88	12.53	25	40	M	1	Bitung
79	malaria6#89	0.287	11	NA	NA	NA	Bitung
80	malaria6#90	0.793	32	38	F	3	Bitung
81	malaria6#94	68.74	32	40	M	6	Bitung
82	malaria7#37	9.283	5	40	M	NA	Bitung
83	malaria7#39	0.275	19	39	M	NA	Bitung
84	malaria7#40	3.002	22	39	F	NA	Bitung
85	malaria7#41	1.7	16	38	F	NA	Bitung
86	malaria7#5	20.703	63	40	F	NA	Bitung
87	malaria7#6	7.211	2	39	F	NA	Bitung
88	malaria7#14	22.214	61	38	F	3	Bitung
89	malaria7#15	1.552	46	38	M	5	Bitung
90	malaria7#16	1.356	59	39.5	M	5	Bitung
91	malaria7#17	1.06	11	40	F	7	Bitung
92	malaria7#24	1.031	43	39	M	NA	Bitung
93	malaria7#29	72.95	10	39	F	4	Bitung
94	malaria7#30	0.445	8.3	38	F	NA	Bitung
95	malaria7#36	1.513	35	39	F	NA	Bitung
96	malaria7#42	58.103	33	39	M	NA	Bitung
97	malaria7#44	32.893	19	40	M	NA	Bitung
98	malaria7#50	0.865	47	38	M	NA	Bitung
99	malaria7#51	1.953	11	39	F	NA	Bitung
100	malaria7#60	5.938	18	39	F	NA	Bitung
101	malaria7#62	7.091	44	38	M	NA	Bitung
102	malaria7#9	9.601	39	39	M	NA	Bitung
103	malaria7#11	0.009	45	40	F	NA	Bitung
104	malaria7#12	0.003	28	38	M	7	Bitung
105	malaria7#19	22.667	11	40	F	NA	Bitung
106	malaria7#38	8.112	14	40	M	NA	Bitung
107	malaria7#61	4.938	36	39	M	NA	Bitung
108	malaria7#09	4.909	34	37.7	M	9	Manado
109	malaria7#52	20.544	6	41	F	NA	Bitung
110	malaria7#54	2.433	23	40	M	NA	Bitung
111	malaria7#56	0.002	32	39	F	NA	Bitung
112	malaria7#46	49.254	9	40	M	NA	Bitung
113	malaria7#49	5.96	30	37	M	NA	Bitung
114	malaria7#010	1.19	6.5	37.5	M	3	Manado
115	malaria7#13	7.865	43	39	M	7	Bitung
116	malaria7#20	23.666	9	41	M	NA	Bitung
117	malaria7#21	6.777	8	38	F	NA	Bitung
118	malaria7#25	7.513	46	40	M	NA	Bitung
119	malaria7#28	0.928	36	39	F	NA	Bitung
120	malaria7#45	0.02	17	39	M	NA	Bitung
121	malaria7#53	0.005	4	38	M	NA	Bitung

## Sheet: Infected_with_other_pathogens
Patient_ID	Patient_Name	%Pf_tags	Age	Temparature	Sex	Infection Date	From
301	malaria8#1	0	5	NA	F	NA	NA
302	malaria8#2	0	8	NA	F	NA	NA
303	malaria8#3	0	5	NA	M	NA	NA
304	malaria8#4	0	9	NA	F	NA	NA
305	malaria8#5	0	1.5	NA	F	NA	NA
306	malaria8#6	0	3	NA	M	NA	NA
307	malaria8#7	0	4	NA	M	NA	NA
308	malaria8#8	0	10	NA	M	NA	NA
309	malaria8#9	0	18	NA	M	NA	NA
310	malaria8#10	0	5.2	NA	F	NA	NA
311	malaria8#11	0	3.7	NA	M	NA	NA
312	malaria8#12	0	2	NA	M	NA	NA
313	malaria8#13	0	0.3	NA	F	NA	NA
314	malaria8#14	0	55	NA	F	NA	NA
315	malaria8#15	0	19	NA	F	NA	NA
316	malaria8#16	0	45	NA	M	NA	NA
317	malaria8#17	0	51	NA	M	NA	NA
318	malaria8#18	0	2	NA	M	NA	NA
319	malaria8#19	0	22	NA	M	NA	NA
320	malaria8#20	0	3	NA	F	NA	NA
321	malaria8#21	0	1.5	NA	M	NA	NA
322	malaria8#22	0	24	NA	F	NA	NA
323	malaria8#23	0	2	NA	F	NA	NA
324	malaria8#24	0	1.5	NA	F	NA	NA
325	malaria8#25	0	1	NA	F	NA	NA
326	malaria8#26	0	10	NA	F	NA	NA
327	malaria8#27	0	1	NA	M	NA	NA
328	malaria8#28	0	5	NA	F	NA	NA

## Sheet: Healty_control
Patient_ID	Patient_Name	%Pf_tags	Age	Temparature	Sex	Infection Date	From
401	malaria11#1	0	8	NA	M	NA	NA
402	malaria11#2	0	6	NA	F	NA	NA
403	malaria11#3	0	7	NA	F	NA	NA
404	malaria11#4	0	12	NA	M	NA	NA
405	malaria11#5	0	16	NA	M	NA	NA
406	malaria11#6	0	13	NA	F	NA	NA
407	malaria11#7	0	14	NA	F	NA	NA
408	malaria11#8	0	13	NA	F	NA	NA
409	malaria11#9	0	25	NA	M	NA	NA
410	malaria11#10	0	25	NA	M	NA	NA
411	malaria11#11	0	22	NA	F	NA	NA
412	malaria11#12	0	22	NA	F	NA	NA
413	malaria11#13	0	37	NA	M	NA	NA
414	malaria11#14	0	36	NA	M	NA	NA
415	malaria11#15	0	38	NA	M	NA	NA
416	malaria11#16	0	36	NA	F	NA	NA
417	malaria11#17	0	33	NA	F	NA	NA
418	malaria11#18	0	41	NA	M	NA	NA
419	malaria11#19	0	48	NA	M	NA	NA
420	malaria11#20	0	49	NA	M	NA	NA
421	malaria11#21	0	48	NA	F	NA	NA
422	malaria11#22	0	52	NA	F	NA	NA
423	malaria11#23	0	62	NA	M	NA	NA
424	malaria11#24	0	63	NA	M	NA	NA
425	malaria11#25	0	9	NA	M	NA	NA
