# Supplementary material for: Interactive transcriptome analysis of malaria patients and infectingPlasmodium falciparum
Source: HighWire-hosted journal article supplement (doi:10.1101/gr.158980.113), 2014-08-04
Supplement: Supplemental_Table_12.xlsx [file Supplemental_Table_12.xlsx]

## Sheet: Results
Humans											Parasites
	Sample ID	Ct	rpkm	logCt	logCt (normlized)	logrpkm (normalized)	Correlation					Sample ID	Ct	rpkm	logCt (normlized)	logrpkm (normalized)		Correlation
NM_080387											PF14_0494
	5	32.4668	4.35465	1.51144	0.638953		-0.878118					5	33.1116	22.8439	1.51998	1.35877		-0.408981
	7	32.069		1.50608								7	33.0231	14.6181	1.51882	1.16489
	9	30.6363	11.9468	1.48624	1.07725							9	33.9798	30.8549	1.53122	1.48932
	11	33.6634	4.90025	1.52716	0.690219							11	Failed
	12	30.5498	32.4719	1.48501	1.51151							12	Failed
	13	31.3203	32.3857	1.49583	1.51035							13	32.6069	18.2829	1.51331	1.26205
	14	29.4343	23.194	1.46885	1.36538							14	31.3387	27.285	1.49608	1.43592
	15	31.837	13.3107	1.50293	1.1242							15	30.6387	126.057	1.48627	2.10057
	17	32.0767	8.83401	1.50619	0.946158							17	31.3533	46.3454	1.49628	1.66601
	18	29.2198	85.6946	1.46568	1.93295							18	32.1641	33.6712	1.50737	1.52726
	20	29.7634	34.9843	1.47368	1.54387							20	31.851	34.59	1.50312	1.53895
	21	31.7102	18.2071	1.5012	1.26024							21	33.3255	29.9068	1.52278	1.47577
	23	30.6897	21.445	1.48699	1.33133							23	32.4675	35.4089	1.51145	1.54911
	24	31.0017	21.3776	1.49139	1.32996							24	30.9162	21.7754	1.49019	1.33797
	26	28.0062	103.36	1.44725	2.01435							26	30.7205	94.9453	1.48743	1.97747
	29	30.0997	26.8118	1.47856	1.42833							29	33.0645	29.3673	1.51936	1.46786
	30	30.0775	9.87534	1.47824	0.994552							30	31.7072	12.4686	1.50116	1.09582
	31	29.4837	34.4001	1.46958	1.53656							31	33.0848	57.6222	1.51963	1.76059
	32	32.34	15.3586	1.50974	1.18635							32	Failed	202.878		2.30723
	33	29.2954	17.8343	1.4668	1.25126							33	36.0688	26.0035	1.55713	1.41503
	34	29.4136	57.8	1.46855	1.76193							34	31.1088	101.011	1.49288	2.00437
	35	29.4874	36.4604	1.46964	1.56182							35	30.6613	52.629	1.48659	1.72122
	36	28.849	40.2836	1.46013	1.60513							36	31.5718	17.0588	1.4993	1.23195
	37	31.2657	8.88704	1.49507	0.948757							37	33.5268	84.2942	1.52539	1.9258
	39	30.734	17.8282	1.48762	1.25111							39	30.4658	172.362	1.48381	2.23644
	40	32.8148	8.96675	1.51607	0.952635							40	31.8546	159.953	1.50317	2.20399
	41	33.1372	7.83323	1.52032	0.893941							41	30.4068	87.331	1.48297	1.94117
	42	26.9553	456.869	1.43064	2.65979							42	31.4052	86.8479	1.497	1.93876
	44	30.3532	46.2584	1.4822	1.66519							44	31.7153	70.485	1.50127	1.8481
	47	33.1642	7.51847	1.52067	0.87613							47	31.5996	41.5209	1.49968	1.61827
	48	32.9711	6.31882	1.51813	0.800636							48	Failed
	50	31.7608	23.5169	1.50189	1.37138							50	32.5987	120.786	1.5132	2.08202
	51	29.6883	52.9584	1.47258	1.72394							51	28.4435	157.836	1.45398	2.19821
	52	29.4027	46.9207	1.46839	1.67136							52	30.6904	55.1287	1.487	1.74138
	53	29.8329	40.9024	1.47469	1.61175							53	Failed
	54	30.0929	39.3538	1.47846	1.59499							54	33.8355	65.3948	1.52937	1.81554
	55	27.0083	225.857	1.4315	2.35383							55	30.2673	80.0753	1.48097	1.9035
	56	32.2857	13.488	1.50901	1.12995							56	Failed
	57	30.7919	13.347	1.48844	1.12538							57	32.2522	7.81702	1.50856	0.893041
	58	29.8665	24.0286	1.47518	1.38073							58	31.2069	108.196	1.49425	2.03421
	60	31.9323	5.55822	1.50423	0.744936							60	32.8808	53.2518	1.51694	1.72633
	61	28.8008	68.6493	1.4594	1.83664							61	33.599	18.5902	1.52633	1.26928
	62	31.0729	37.1475	1.49238	1.56993							62	31.7977	56.9186	1.5024	1.75525
	009	29.3303	54.3313	1.46732	1.73505							009	32.7486	23.1786	1.51519	1.36509
	010	30.3261	56.1829	1.48182	1.7496							010	30.7781	24.2683	1.48824	1.38504
	011	31.0251	26.5542	1.49171	1.42413							011	Failed
	012	30.5707	22.2903	1.48531	1.34812							012	31.6121	31.6497	1.49985	1.50037
	013	32.1251	9.76634	1.50684	0.989732							013	30.6223	28.8026	1.48604	1.45943
NM_001024							-0.801244				PFI0340c							-0.573845
	5	27.859	555.349	1.44497	2.74457							5	32.1921	10.2045	1.50775	1.00879
	7	27.3218	610.206	1.43651	2.78548							7	31.7245	405.747	1.5014	2.60825
	9	28.5411	210.921	1.45547	2.32412							9	Failed
	11	28.4611	676.536	1.45425	2.83029							11	Failed
	12	29.3739	351.208	1.46796	2.54556							12	Failed
	13	28.0054	603.424	1.44724	2.78062							13	31.1981	8.24611	1.49413	0.916249
	14	28.7794	317.385	1.45908	2.50159							14	29.9136	18.2666	1.47587	1.26166
	15	29.8096	114.997	1.47436	2.06069							15	30.5208	44.1482	1.4846	1.64491
	17	27.5079	549.502	1.43946	2.73997							17	30.5525	17.4953	1.48505	1.24292
	18	30.1672	169.415	1.47954	2.22895							18	31.931	3.11539	1.50421	0.493513
	20	28.515	302.442	1.45507	2.48064							20	31.7861	7.41331	1.50224	0.870012
	21	28.5848	331.681	1.45614	2.52072							21	Failed
	23	29.0723	199.831	1.46348	2.30066							23	32.5871	5.38798	1.51305	0.731426
	24	29.6828	207.613	1.47251	2.31725							24	30.191	5.48301	1.47988	0.739019
	26	30.0995	114.711	1.47856	2.05961							26	30.2229	21.0175	1.48034	1.32258
	29	27.4748	360.872	1.43894	2.55735							29	31.5109	3.04974	1.49846	0.484262
	30	27.9661	424.826	1.44663	2.62821							30	31.3819	18.0513	1.49668	1.25651
	31	28.606	272.695	1.45646	2.43568							31	32.4753	34.422	1.51155	1.53684
	32	28.3797	454.446	1.45301	2.65748							32	Failed
	33	28.5999	110.49	1.45636	2.04332							33	36.0307	2.87089	1.55667	0.458016
	34	28.9588	157.44	1.46178	2.19712							34	Failed
	35	28.4575	194.003	1.4542	2.28781							35	29.4322	34.4065	1.46882	1.53664
	36	28.4715	201.982	1.45441	2.30531							36	30.2234	4.25655	1.48034	0.629058
	37	27.7738	393.176	1.44364	2.59459							37	Failed
	39	29.2151	166.683	1.46561	2.22189							39	Failed
	40	29.2496	288.611	1.46612	2.46031							40	32.1487	11.0869	1.50716	1.04481
	41	30.2324	149.307	1.48047	2.17408							41	30.8439	4.0773	1.48917	0.610373
	42	29.2871	199.966	1.46668	2.30096							42	30.6882	9.08082	1.48697	0.958125
	44	28.9619	269.771	1.46183	2.431							44	30.621	7.81561	1.48602	0.892963
	47	29.2112	177.171	1.46555	2.24839							47	32.5236	9.07726	1.5122	0.957955
	48	29.1138	227.791	1.4641	2.35754							48	27.5498	201.983	1.44012	2.30531
	50	29.018	261.333	1.46267	2.41719							50	32.4068	99.4848	1.51064	1.99776
	51	28.6046	473.179	1.45644	2.67503							51	27.0011	380.825	1.43138	2.58073
	52	28.0527	307.716	1.44797	2.48815							52	29.7128	12.3317	1.47294	1.09102
	53	29.3999	179.98	1.46835	2.25522							53	Failed
	54	30.1781	117.764	1.47969	2.07101							54	Failed
	55	27.9915	159.332	1.44703	2.2023							55	30.2151	7.32207	1.48022	0.864634
	56	32.7965	24.595	1.51583	1.39085							56	Failed
	57	29.6561	96.9575	1.47211	1.98658							57	32.8732	16.1652	1.51684	1.20858
	58	29.3322	141.926	1.46734	2.15206							58	30.1973	148.906	1.47997	2.17291
	60	28.3785	573.958	1.45299	2.75888							60	32.9901	3.38158	1.51838	0.52912
	61	30.0052	104.378	1.4772	2.01861							61	33.047	3.08761	1.51913	0.489622
	62	28.8974	293.632	1.46086	2.4678							62	32.1561	4.88649	1.50726	0.688997
	009	27.7338	551.352	1.44301	2.74143							009	29.9404	30.7494	1.47626	1.48784
	010	28.3775	1262	1.45297	3.10106							010	29.5858	15.6146	1.47108	1.19353
	011	27.7606	505.645	1.44343	2.70385							011	28.0834	453.592	1.44845	2.65667
	012	28.9639	286.76	1.46186	2.45752							012	30.2951	10.0846	1.48137	1.00366
	013	28.8313	296.047	1.45986	2.47136							013	30.6778	72.9747	1.48682	1.86317
NM_004244							-0.766491				MAL8P1.92							-0.643858
	5	29.8371	44.6359	1.47476	1.64968							5	33.0748	19.6944	1.5195	1.29434
	7	32.6074	1.65526	1.51332	0.218866							7	32.8791	25.0876	1.51692	1.39946
	9	28.8894	86.4618	1.46074	1.93682							9	Failed
	11	31.5975	9.5055	1.49965	0.977975							11	Failed
	12	28.4927	77.1278	1.45473	1.88721							12	Failed
	13	30.563	54.3309	1.4852	1.73505							13	31.4048	7.62561	1.497	0.882274
	14	28.9061	72.2636	1.46099	1.85892							14	32.1154	9.16201	1.50671	0.961991
	16	32.6238	13.1705	1.51353	1.1196							15	31.8975	34.873	1.50376	1.54249
	18	29.2552	53.2644	1.4662	1.72644							17	30.6406	8.6363	1.4863	0.936328
	20	31.9105	27.5148	1.50393	1.43957							18	32.1766	22.1429	1.50754	1.34524
	21	32.7871	15.7632	1.5157	1.19765							20	32.3962	20.1924	1.51049	1.30519
	23	28.1681	63.2744	1.44976	1.80123							21	32.6803	15.1915	1.51429	1.1816
	24	30.6146	10.0315	1.48593	1.00137							23	31.6464	16.4371	1.50032	1.21583
	25	32.2502	31.1064	1.50853	1.49285							24	29.6473	12.9899	1.47199	1.1136
	26	30.8879	22.1531	1.48979	1.34543							26	30.7821	68.4364	1.4883	1.83529
	28	32.6996	18.5948	1.51454	1.26939							29	32.8464	16.6652	1.51649	1.22181
	29	32.2243	9.253	1.50818	0.966282							30	31.2441		1.49477
	30	30.5887	4.9165	1.48556	0.691656							31	32.283	36.4667	1.50897	1.5619
	31	30.2561	14.7365	1.48081	1.1684							32	26.9503	870.306	1.43056	2.93967
	32	33.1972	5.88776	1.5211	0.76995							33	36.17	9.54377	1.55835	0.97972
	34	30.1369	42.0254	1.4791	1.62351							34	Failed
	37	30.7256	15.0905	1.4875	1.1787							35	28.8467	43.6825	1.4601	1.64031
	38	30.5081	30.7118	1.48441	1.48731							36	29.3764	8.5782	1.468	0.933396
	39	29.7704	30.2199	1.47378	1.48029							37	Failed
	40	31.387	10.33	1.49675	1.0141							39	28.6103	98.5431	1.45652	1.99363
	41	30.6124	10.6022	1.4859	1.0254							40	30.3263	90.4832	1.48182	1.95657
	42	30.3508	40.8602	1.48217	1.6113							41	29.5693	57.9824	1.47084	1.7633
	44	29.0614	70.5287	1.46332	1.84837							42	29.7208	46.2342	1.47306	1.66496
	45	31.3837	20.5706	1.4967	1.31325							44	29.6348	56.2512	1.4718	1.75013
	46	30.4754	25.9957	1.48395	1.4149							47	30.2132	20.7709	1.4802	1.31746
	47	30.6203	20.2381	1.48601	1.30617							48	28.8262		1.45979
	48	30.0295	35.4116	1.47755	1.54915							50	30.8858	100.021	1.48976	2.00009
	51	31.9069	7.35908	1.50388	0.866824							51	27.8935	128.907	1.4455	2.11028
	52	30.3183	28.9233	1.4817	1.46125							52	27.6075	52.4905	1.44103	1.72008
	53	27.5868	152.267	1.4407	2.18261							53	Failed
	54	33.116	15.9767	1.52004	1.20349							54	Failed
	55	29.6216	44.2191	1.47161	1.64561							55	28.1976	51.625	1.45021	1.71286
	56	31.4702	24.4312	1.4979	1.38794							56	Failed
	57	28.3602	65.0291	1.45271	1.81311							57	31.6617	4.78816	1.50053	0.680169
	58	31.8855	11.6755	1.50359	1.06727							58	28.988	115.582	1.46222	2.06289
	60	31.0994	9.61833	1.49275	0.9831							60	32.4841	20.0538	1.51167	1.3022
	62	29.3405	57.3178	1.46747	1.75829							61	30.9714	10.6905	1.49096	1.029
	009	30.2792	20.0195	1.48114	1.30145							62	29.3469	30.0203	1.46756	1.47741
	010	34.2252	7.92561	1.53435	0.899033							009	32.2336	7.73029	1.50831	0.888196
	011	34.7163	6.79381	1.54053	0.832114							010	31.8091	16.1859	1.50255	1.20914
	012	27.857	37.8004	1.44493	1.5775							011	29.1055	100.779	1.46398	2.00337
	013	31.6974	14.0728	1.50102	1.14838							012	31.9208	9.89204	1.50407	0.995286
												013	31.0222	6.17857	1.49167	0.790888
NM_170662							-0.627297
	5	31.0165	4.66031	1.49159	0.668414						PF10_0329							-0.955245
	7	29.6832	7.24176	1.47251	0.859844							5	37.3271	7.21363	1.57202	0.858154
	9	33.0894	1.32368	1.51969	0.121784							7	30.3634	456.453	1.48235	2.6594
	11	31.265	7.71591	1.49506	0.887387							9	34.7497	17.283	1.54095	1.23762
	12	32.1216	3.68926	1.5068	0.56694							11	Failed
	13	32.3067	10.1821	1.50929	1.00784							12	Failed
	14	31.5297	2.89923	1.49872	0.462283							13	32.982	37.4674	1.51828	1.57365
	16	33.3399	5.42035	1.52296	0.734027							14	35.8382	0.517026	1.55435	-0.286488
	18	31.5279	4.71728	1.4987	0.673691							16	29.1471	234.216	1.46459	2.36962
	20	32.2846	8.41908	1.509	0.925264							18	Failed
	21	32.3135	7.52924	1.50938	0.876751							20	39.314	0.260711	1.59455	-0.58384
	23	31.2781	4.2784	1.49524	0.631281							21	Failed
	24	30.9228	5.06454	1.49028	0.70454							23	35.7363	1.11564	1.55311	0.047524
	25	32.8692	4.17595	1.51679	0.620755							24	Failed
	26	32.2044	1.89126	1.50791	0.276751							25	35.146	17.9087	1.54588	1.25306
	28	31.3778	8.28892	1.49662	0.918498							26	34.7229	7.6922	1.54062	0.88605
	29	32.1518	4.93872	1.5072	0.693614							28	Failed
	30	28.9194	8.88752	1.46119	0.94878							29	43.5926	0.0851527	1.63941	-1.0698
	31	30.4854	2.33877	1.48409	0.368988							30	29.2683	883.063	1.4664	2.94599
	32	29.5894	12.7831	1.47114	1.10664							31	34.9842	22.993	1.54387	1.3616
	34	30.849	4.98297	1.48924	0.697488							32	24.9476	19468.4	1.39703	4.28933
	37	30.2038	10.8559	1.48006	1.03567							34	33.4239	2.57	1.52406	0.409933
	38	30.5801	8.54032	1.48544	0.931474							37	Failed
	39	30.519	5.48179	1.48457	0.738923							38	36.6208	5.15313	1.56373	0.712071
	40	30.1258	11.15	1.47894	1.04727							39	Failed
	41	30.0177	7.51558	1.47738	0.875963							40	35.5041	3.88941	1.55028	0.589883
	42	32.1856	4.11199	1.50766	0.614052							41	Failed
	44	30.4594	12.7142	1.48372	1.10429							42	Failed
	45	30.8669	7.68826	1.48949	0.885828							44	38.0357	0.0963788	1.58019	-1.01602
	46	30.9377	8.95937	1.49049	0.952277							45	Failed
	47	30.2683	11.6737	1.48099	1.06721							46	40.2978	1.14495	1.60528	0.0587873
	48	31.1042	9.77791	1.49282	0.990246							47	Failed
	51	31.2513	15.3817	1.49487	1.187							48	Failed
	52	31.6228	7.45112	1.5	0.872221							51	25.5271	7210.69	1.407	3.85798
	53	33.0814	4.53197	1.51958	0.656287							52	Failed
	54	32.9206	3.18111	1.51747	0.502579							53	Failed
	55	31.4929	3.00004	1.49821	0.477127							54	Failed
	56	36.7663	0.343125	1.56545	-0.464548							55	37.696	0.467597	1.5763	-0.330129
	57	30.9275	4.41521	1.49034	0.644951							56	Failed
	58	31.5227	4.27868	1.49862	0.631309							57	Failed
	60	29.0393	13.8851	1.46299	1.14255							58	25.0823	11659.9	1.39937	4.0667
	62	31.1818	8.52149	1.4939	0.930516							60		1.64217		0.215418
	009	30.5282	4.48579	1.4847	0.651839							62	Failed
	010	29.616	27.2993	1.47153	1.43615							009	Failed
	011	34.4434	12.2289	1.53711	1.08739							010	29.7547	326.382	1.47356	2.51373
	012	32.5625	1.36183	1.51272	0.134124							011	27.1665	1073.47	1.43403	3.03079
	013	30.715	11.6517	1.48735	1.06639							012	Failed
												013	27.7046	953.999	1.44255	2.97955
											PF08_0136							-0.920668
												5	32.8149	26.9299	1.51607	1.43023
												7	29.0693	508.37	1.46343	2.70618
												9	34.1627	7.58815	1.53355	0.880136
												11	Failed
												12	Failed
												13	30.8447	29.3839	1.48918	1.46811
												14	32.2267	8.90272	1.50822	0.949523
												15	Failed
												16	28.5816	36.1324	1.45609	1.5579
												18	37.1469	0.814923	1.56992	-0.0888834
												20	36.9435	1.49339	1.56754	0.174172
												21	37.2873	1.67192	1.57156	0.223216
												23	34.2154	7.95982	1.53422	0.900903
												24	Failed
												25	33.61	51.1192	1.52647	1.70858
												26	33.4099	18.2791	1.52387	1.26195
												28	Failed
												29	42.1493	0.154795	1.62479	-0.810243
												30	28.2596	243.888	1.45117	2.38719
												31	32.5114	43.756	1.51204	1.64104
												32	Failed
												33	38.9854	8.78257	1.5909	0.943622
												34	Failed
												35	Failed
												36	30.0237	23.0057	1.47746	1.36184
												37	Failed
												38	33.6985	23.5357	1.52761	1.37173
												39	30.9259	107.005	1.49032	2.0294
												40	31.6468	33.2735	1.50033	1.5221
												41	Failed
												42	38.3975	0.6	1.5843	-0.221849
												44	38.2624	0.549259	1.58277	-0.260223
												45	Failed
												46	35.1255	6.55325	1.54562	0.816456
												47	31.4314	28.1921	1.49736	1.45013
												48	Failed
												51	24.584	1861.9	1.39065	3.26996
												52	34.3271	1.03092	1.53564	0.0132235
												53	Failed
												54	37.4857	3.77333	1.57387	0.576725
												55	35.5918	0.890918	1.55135	-0.050162
												56	Failed
												57	Failed
												58	25.1358	3051.37	1.40029	3.48449
												60	Failed
												61	34.2195	4.27734	1.53427	0.631174
												62	33.3548	1.79834	1.52316	0.254871
												009	30.6866	75.5291	1.48695	1.87811
												010	26.5445	492.091	1.42397	2.69205
												011	25.8732	2552.98	1.41285	3.40705
												012	Failed
												013	26.9026	187.768	1.42979	2.27362

## Sheet: Primers
Human	Gene	Gene ID	Forward/Reverse	Primer sequence
	glyceraldehyde-3-phosphate dehydrogenase	NM_002046	F	TGCACCACCAACTGCTTAGC
			R	GGCATGGACTGTGGTCATGAG
	Homo sapiens dual specificity phosphatase 1	NM_004417	F	CTGCCTTGATCAACGTCTCA
			R	TGTCTGCCTTGTGGTTGTCC
	C-type lectin domain family 4 member D	NM_080387	F	CCATTTAACCCACGCAGAGT
			R	TTCCAGGCCCATTTATCTTG
	40S ribosomal protein S21	NM_001024	F	GAAATGCTCCGCTAGCAATC
			R	AACCTGCCTGTGACCTTGTC
	E3 ubiquitin-protein ligase CBL-B	NM_170662	F	TCCTGCAAGGCATAGTCTCA
			R	AGGAACTTGGCCACTTGCTA
	scavenger receptor cysteine-rich type 1 protein	NM_004244	F	CAATGGGGTGGACTTACCTG
			R	GCTTCACTTCAACACGTCCA
Pf
	glyceraldehyde-3-phosphate dehydrogenase	PF14_0598	F	TGGAATTGTTGAAGGTTTAATG
			R	CTGGAATAATGTTGGATAATGC
	small subunit rRNA processing factor putative	PF14_0494	F	CAACCCCCAAGCTAATGTTG
			R	TTTCCCACAAAGGGATATTCTC
	conserved Plasmodium protein, unknown function	PFI0340c	F	CAAACAGAATAAAGCAGGAAAGG
			R	AAATTTTTATTGTCCGGTAGATGC
	ATPase, putative	MAL8P1.92	F	GACCAGAGGATATAGTGGTGCTG
			R	TATCGCGACATTCTTGTAAAGC
	plasmepsin Ⅶ	PF10_0329	F	ATCTGGACTCCCGTGTCAAC
			R	TCCTCCATCATGAAATGCTTC
	hypothetical protein	PF08_0136	F	AGTGAAGGATGATTTTAACGAAGC
			R	ATTTCATTTGTTCCTTATCACACAA
